# Supplementary material for: Cytotoxicity analysis of nanoparticles by association rule mining
Source: Royal Society of Chemistry journal article supplement (doi:10.1039/d0en01240h), 2021-01-01
Supplement: d0en01240h1.xlsx [file d0en01240h1.xlsx]

## Sheet: Viability
No	Year	Material	Type	Shape	Coat/Functional Group	Synthesis_Method	Surface_Charge	Diameter (nm)	Size_in_Water (nm)	Size_in_Medium (nm)	Zeta_in_Water (mV)	Zeta_in_Medium (mV)	Cell_Type	No_of_Cells (cells/well)	Human_Animal	Cell_Source	Cell_Tissue	Cell_Morphology	Cell_Age	Cell Line_Primary Cell	Time (hr)	Concentration (ug/ml)	Test	Test_Indicator	Aspect_Ratio	Cell_Viability (%)	PDI	Article_ID	DOI
1	2015	SiO2	I	Sphere	CTAB	Precipitation	Negative		386.9	90.09	-35.9		PC12	5000	A	Rat	Adrenal Gland	Irregular	Adult	L	12	1.95	MTT	TetrazoliumSalt		113.67		1	10.3109/15376516.2015.1070229
2	2015	SiO2	I	Sphere	CTAB	Precipitation	Negative		386.9	90.09	-35.9		PC12	5000	A	Rat	Adrenal Gland	Irregular	Adult	L	12	3.9	MTT	TetrazoliumSalt		97.265		1	10.3109/15376516.2015.1070229
3	2015	SiO2	I	Sphere	CTAB	Precipitation	Negative		386.9	90.09	-35.9		PC12	5000	A	Rat	Adrenal Gland	Irregular	Adult	L	12	7.8	MTT	TetrazoliumSalt		108.73		1	10.3109/15376516.2015.1070229
4	2015	SiO2	I	Sphere	CTAB	Precipitation	Negative		386.9	90.09	-35.9		PC12	5000	A	Rat	Adrenal Gland	Irregular	Adult	L	12	15.6	MTT	TetrazoliumSalt		98.451		1	10.3109/15376516.2015.1070229
5	2015	SiO2	I	Sphere	CTAB	Precipitation	Negative		386.9	90.09	-35.9		PC12	5000	A	Rat	Adrenal Gland	Irregular	Adult	L	12	31.2	MTT	TetrazoliumSalt		98.056		1	10.3109/15376516.2015.1070229
6	2015	SiO2	I	Sphere	CTAB	Precipitation	Negative		386.9	90.09	-35.9		PC12	5000	A	Rat	Adrenal Gland	Irregular	Adult	L	12	62.5	MTT	TetrazoliumSalt		100.43		1	10.3109/15376516.2015.1070229
7	2015	SiO2	I	Sphere	CTAB	Precipitation	Negative		386.9	90.09	-35.9		PC12	5000	A	Rat	Adrenal Gland	Irregular	Adult	L	12	125	MTT	TetrazoliumSalt		95.881		1	10.3109/15376516.2015.1070229
8	2015	SiO2	I	Sphere	CTAB	Precipitation	Negative		386.9	90.09	-35.9		PC12	5000	A	Rat	Adrenal Gland	Irregular	Adult	L	12	250	MTT	TetrazoliumSalt		79.473		1	10.3109/15376516.2015.1070229
9	2015	SiO2	I	Sphere	CTAB	Precipitation	Negative		386.9	90.09	-35.9		PC12	5000	A	Rat	Adrenal Gland	Irregular	Adult	L	12	500	MTT	TetrazoliumSalt		94.893		1	10.3109/15376516.2015.1070229
10	2015	SiO2	I	Sphere	CTAB	Precipitation	Negative		386.9	90.09	-35.9		PC12	5000	A	Rat	Adrenal Gland	Irregular	Adult	L	12	1000	MTT	TetrazoliumSalt		79.275		1	10.3109/15376516.2015.1070229
11	2015	SiO2	I	Sphere	CTAB	Precipitation	Negative		386.9	90.09	-35.9		PC12	5000	A	Rat	Adrenal Gland	Irregular	Adult	L	24	1.95	MTT	TetrazoliumSalt		105.21		1	10.3109/15376516.2015.1070229
12	2015	SiO2	I	Sphere	CTAB	Precipitation	Negative		386.9	90.09	-35.9		PC12	5000	A	Rat	Adrenal Gland	Irregular	Adult	L	24	3.9	MTT	TetrazoliumSalt		120.85		1	10.3109/15376516.2015.1070229
13	2015	SiO2	I	Sphere	CTAB	Precipitation	Negative		386.9	90.09	-35.9		PC12	5000	A	Rat	Adrenal Gland	Irregular	Adult	L	24	7.8	MTT	TetrazoliumSalt		117.25		1	10.3109/15376516.2015.1070229
14	2015	SiO2	I	Sphere	CTAB	Precipitation	Negative		386.9	90.09	-35.9		PC12	5000	A	Rat	Adrenal Gland	Irregular	Adult	L	24	15.6	MTT	TetrazoliumSalt		106.06		1	10.3109/15376516.2015.1070229
15	2015	SiO2	I	Sphere	CTAB	Precipitation	Negative		386.9	90.09	-35.9		PC12	5000	A	Rat	Adrenal Gland	Irregular	Adult	L	24	31.2	MTT	TetrazoliumSalt		84.93		1	10.3109/15376516.2015.1070229
16	2015	SiO2	I	Sphere	CTAB	Precipitation	Negative		386.9	90.09	-35.9		PC12	5000	A	Rat	Adrenal Gland	Irregular	Adult	L	24	62.5	MTT	TetrazoliumSalt		96.127		1	10.3109/15376516.2015.1070229
17	2015	SiO2	I	Sphere	CTAB	Precipitation	Negative		386.9	90.09	-35.9		PC12	5000	A	Rat	Adrenal Gland	Irregular	Adult	L	24	125	MTT	TetrazoliumSalt		94.225		1	10.3109/15376516.2015.1070229
18	2015	SiO2	I	Sphere	CTAB	Precipitation	Negative		386.9	90.09	-35.9		PC12	5000	A	Rat	Adrenal Gland	Irregular	Adult	L	24	250	MTT	TetrazoliumSalt		103.94		1	10.3109/15376516.2015.1070229
19	2015	SiO2	I	Sphere	CTAB	Precipitation	Negative		386.9	90.09	-35.9		PC12	5000	A	Rat	Adrenal Gland	Irregular	Adult	L	24	500	MTT	TetrazoliumSalt		79.014		1	10.3109/15376516.2015.1070229
20	2015	SiO2	I	Sphere	CTAB	Precipitation	Negative		386.9	90.09	-35.9		PC12	5000	A	Rat	Adrenal Gland	Irregular	Adult	L	24	1000	MTT	TetrazoliumSalt		63.803		1	10.3109/15376516.2015.1070229
21	2015	SiO2	I	Sphere	Ph	Precipitation	Negative		375.4	135.83	-26.8		PC12	5000	A	Rat	Adrenal Gland	Irregular	Adult	L	12	1.95	MTT	TetrazoliumSalt		97.463		1	10.3109/15376516.2015.1070229
22	2015	SiO2	I	Sphere	Ph	Precipitation	Negative		375.4	135.83	-26.8		PC12	5000	A	Rat	Adrenal Gland	Irregular	Adult	L	12	3.9	MTT	TetrazoliumSalt		95.486		1	10.3109/15376516.2015.1070229
23	2015	SiO2	I	Sphere	Ph	Precipitation	Negative		375.4	135.83	-26.8		PC12	5000	A	Rat	Adrenal Gland	Irregular	Adult	L	12	7.8	MTT	TetrazoliumSalt		89.951		1	10.3109/15376516.2015.1070229
24	2015	SiO2	I	Sphere	Ph	Precipitation	Negative		375.4	135.83	-26.8		PC12	5000	A	Rat	Adrenal Gland	Irregular	Adult	L	12	15.6	MTT	TetrazoliumSalt		105.96		1	10.3109/15376516.2015.1070229
25	2015	SiO2	I	Sphere	Ph	Precipitation	Negative		375.4	135.83	-26.8		PC12	5000	A	Rat	Adrenal Gland	Irregular	Adult	L	12	31.2	MTT	TetrazoliumSalt		95.091		1	10.3109/15376516.2015.1070229
26	2015	SiO2	I	Sphere	Ph	Precipitation	Negative		375.4	135.83	-26.8		PC12	5000	A	Rat	Adrenal Gland	Irregular	Adult	L	12	62.5	MTT	TetrazoliumSalt		96.474		1	10.3109/15376516.2015.1070229
27	2015	SiO2	I	Sphere	Ph	Precipitation	Negative		375.4	135.83	-26.8		PC12	5000	A	Rat	Adrenal Gland	Irregular	Adult	L	12	125	MTT	TetrazoliumSalt		94.3		1	10.3109/15376516.2015.1070229
28	2015	SiO2	I	Sphere	Ph	Precipitation	Negative		375.4	135.83	-26.8		PC12	5000	A	Rat	Adrenal Gland	Irregular	Adult	L	12	250	MTT	TetrazoliumSalt		72.356		1	10.3109/15376516.2015.1070229
29	2015	SiO2	I	Sphere	Ph	Precipitation	Negative		375.4	135.83	-26.8		PC12	5000	A	Rat	Adrenal Gland	Irregular	Adult	L	12	500	MTT	TetrazoliumSalt		70.774		1	10.3109/15376516.2015.1070229
30	2015	SiO2	I	Sphere	Ph	Precipitation	Negative		375.4	135.83	-26.8		PC12	5000	A	Rat	Adrenal Gland	Irregular	Adult	L	12	1000	MTT	TetrazoliumSalt		71.763		1	10.3109/15376516.2015.1070229
31	2015	SiO2	I	Sphere	Ph	Precipitation	Negative		375.4	135.83	-26.8		PC12	5000	A	Rat	Adrenal Gland	Irregular	Adult	L	24	1.95	MTT	TetrazoliumSalt		103.52		1	10.3109/15376516.2015.1070229
32	2015	SiO2	I	Sphere	Ph	Precipitation	Negative		375.4	135.83	-26.8		PC12	5000	A	Rat	Adrenal Gland	Irregular	Adult	L	24	3.9	MTT	TetrazoliumSalt		96.761		1	10.3109/15376516.2015.1070229
33	2015	SiO2	I	Sphere	Ph	Precipitation	Negative		375.4	135.83	-26.8		PC12	5000	A	Rat	Adrenal Gland	Irregular	Adult	L	24	7.8	MTT	TetrazoliumSalt		109.86		1	10.3109/15376516.2015.1070229
34	2015	SiO2	I	Sphere	Ph	Precipitation	Negative		375.4	135.83	-26.8		PC12	5000	A	Rat	Adrenal Gland	Irregular	Adult	L	24	15.6	MTT	TetrazoliumSalt		122.75		1	10.3109/15376516.2015.1070229
35	2015	SiO2	I	Sphere	Ph	Precipitation	Negative		375.4	135.83	-26.8		PC12	5000	A	Rat	Adrenal Gland	Irregular	Adult	L	24	31.2	MTT	TetrazoliumSalt		104.58		1	10.3109/15376516.2015.1070229
36	2015	SiO2	I	Sphere	Ph	Precipitation	Negative		375.4	135.83	-26.8		PC12	5000	A	Rat	Adrenal Gland	Irregular	Adult	L	24	62.5	MTT	TetrazoliumSalt		118.73		1	10.3109/15376516.2015.1070229
37	2015	SiO2	I	Sphere	Ph	Precipitation	Negative		375.4	135.83	-26.8		PC12	5000	A	Rat	Adrenal Gland	Irregular	Adult	L	24	125	MTT	TetrazoliumSalt		94.648		1	10.3109/15376516.2015.1070229
38	2015	SiO2	I	Sphere	Ph	Precipitation	Negative		375.4	135.83	-26.8		PC12	5000	A	Rat	Adrenal Gland	Irregular	Adult	L	24	250	MTT	TetrazoliumSalt		103.1		1	10.3109/15376516.2015.1070229
39	2015	SiO2	I	Sphere	Ph	Precipitation	Negative		375.4	135.83	-26.8		PC12	5000	A	Rat	Adrenal Gland	Irregular	Adult	L	24	500	MTT	TetrazoliumSalt		105.63		1	10.3109/15376516.2015.1070229
40	2015	SiO2	I	Sphere	Ph	Precipitation	Negative		375.4	135.83	-26.8		PC12	5000	A	Rat	Adrenal Gland	Irregular	Adult	L	24	1000	MTT	TetrazoliumSalt		80.493		1	10.3109/15376516.2015.1070229
41	2015	SiO2	I	Sphere	NH2	Precipitation	Positive		437	142.11	21.7		PC12	5000	A	Rat	Adrenal Gland	Irregular	Adult	L	12	1.95	MTT	TetrazoliumSalt		120		1	10.3109/15376516.2015.1070229
42	2015	SiO2	I	Sphere	NH2	Precipitation	Positive		437	142.11	21.7		PC12	5000	A	Rat	Adrenal Gland	Irregular	Adult	L	12	3.9	MTT	TetrazoliumSalt		119.41		1	10.3109/15376516.2015.1070229
43	2015	SiO2	I	Sphere	NH2	Precipitation	Positive		437	142.11	21.7		PC12	5000	A	Rat	Adrenal Gland	Irregular	Adult	L	12	7.8	MTT	TetrazoliumSalt		109.52		1	10.3109/15376516.2015.1070229
44	2015	SiO2	I	Sphere	NH2	Precipitation	Positive		437	142.11	21.7		PC12	5000	A	Rat	Adrenal Gland	Irregular	Adult	L	12	15.6	MTT	TetrazoliumSalt		111.3		1	10.3109/15376516.2015.1070229
45	2015	SiO2	I	Sphere	NH2	Precipitation	Positive		437	142.11	21.7		PC12	5000	A	Rat	Adrenal Gland	Irregular	Adult	L	12	31.2	MTT	TetrazoliumSalt		114.86		1	10.3109/15376516.2015.1070229
46	2015	SiO2	I	Sphere	NH2	Precipitation	Positive		437	142.11	21.7		PC12	5000	A	Rat	Adrenal Gland	Irregular	Adult	L	12	62.5	MTT	TetrazoliumSalt		116.05		1	10.3109/15376516.2015.1070229
47	2015	SiO2	I	Sphere	NH2	Precipitation	Positive		437	142.11	21.7		PC12	5000	A	Rat	Adrenal Gland	Irregular	Adult	L	12	125	MTT	TetrazoliumSalt		106.95		1	10.3109/15376516.2015.1070229
48	2015	SiO2	I	Sphere	NH2	Precipitation	Positive		437	142.11	21.7		PC12	5000	A	Rat	Adrenal Gland	Irregular	Adult	L	12	250	MTT	TetrazoliumSalt		73.74		1	10.3109/15376516.2015.1070229
49	2015	SiO2	I	Sphere	NH2	Precipitation	Positive		437	142.11	21.7		PC12	5000	A	Rat	Adrenal Gland	Irregular	Adult	L	12	500	MTT	TetrazoliumSalt		93.904		1	10.3109/15376516.2015.1070229
50	2015	SiO2	I	Sphere	NH2	Precipitation	Positive		437	142.11	21.7		PC12	5000	A	Rat	Adrenal Gland	Irregular	Adult	L	12	1000	MTT	TetrazoliumSalt		76.31		1	10.3109/15376516.2015.1070229
51	2015	SiO2	I	Sphere	NH2	Precipitation	Positive		437	142.11	21.7		PC12	5000	A	Rat	Adrenal Gland	Irregular	Adult	L	24	1.95	MTT	TetrazoliumSalt		104.15		1	10.3109/15376516.2015.1070229
52	2015	SiO2	I	Sphere	NH2	Precipitation	Positive		437	142.11	21.7		PC12	5000	A	Rat	Adrenal Gland	Irregular	Adult	L	24	3.9	MTT	TetrazoliumSalt		102.89		1	10.3109/15376516.2015.1070229
53	2015	SiO2	I	Sphere	NH2	Precipitation	Positive		437	142.11	21.7		PC12	5000	A	Rat	Adrenal Gland	Irregular	Adult	L	24	7.8	MTT	TetrazoliumSalt		102.04		1	10.3109/15376516.2015.1070229
54	2015	SiO2	I	Sphere	NH2	Precipitation	Positive		437	142.11	21.7		PC12	5000	A	Rat	Adrenal Gland	Irregular	Adult	L	24	15.6	MTT	TetrazoliumSalt		94.225		1	10.3109/15376516.2015.1070229
55	2015	SiO2	I	Sphere	NH2	Precipitation	Positive		437	142.11	21.7		PC12	5000	A	Rat	Adrenal Gland	Irregular	Adult	L	24	31.2	MTT	TetrazoliumSalt		90.423		1	10.3109/15376516.2015.1070229
56	2015	SiO2	I	Sphere	NH2	Precipitation	Positive		437	142.11	21.7		PC12	5000	A	Rat	Adrenal Gland	Irregular	Adult	L	24	62.5	MTT	TetrazoliumSalt		91.056		1	10.3109/15376516.2015.1070229
57	2015	SiO2	I	Sphere	NH2	Precipitation	Positive		437	142.11	21.7		PC12	5000	A	Rat	Adrenal Gland	Irregular	Adult	L	24	125	MTT	TetrazoliumSalt		100.77		1	10.3109/15376516.2015.1070229
58	2015	SiO2	I	Sphere	NH2	Precipitation	Positive		437	142.11	21.7		PC12	5000	A	Rat	Adrenal Gland	Irregular	Adult	L	24	250	MTT	TetrazoliumSalt		96.761		1	10.3109/15376516.2015.1070229
59	2015	SiO2	I	Sphere	NH2	Precipitation	Positive		437	142.11	21.7		PC12	5000	A	Rat	Adrenal Gland	Irregular	Adult	L	24	500	MTT	TetrazoliumSalt		103.94		1	10.3109/15376516.2015.1070229
60	2015	SiO2	I	Sphere	NH2	Precipitation	Positive		437	142.11	21.7		PC12	5000	A	Rat	Adrenal Gland	Irregular	Adult	L	24	1000	MTT	TetrazoliumSalt		85.775		1	10.3109/15376516.2015.1070229
61	2012	SiO2	I	Sphere	None	Commercial	Negative	10	7	10	-27		RAW264.7	2600	A	Mouse	Ascites	Monocyte/Macrophage	Adult	L	24	1	CellTiterBlue	AlamarBlue		107.59		2	10.5402/2012/454072
62	2012	SiO2	I	Sphere	None	Commercial	Negative	10	7	10	-27		RAW264.7	2600	A	Mouse	Ascites	Monocyte/Macrophage	Adult	L	24	10	CellTiterBlue	AlamarBlue		100.81		2	10.5402/2012/454072
63	2012	SiO2	I	Sphere	None	Commercial	Negative	10	7	10	-27		RAW264.7	2600	A	Mouse	Ascites	Monocyte/Macrophage	Adult	L	24	100	CellTiterBlue	AlamarBlue		70.11		2	10.5402/2012/454072
64	2012	SiO2	I	Sphere	None	Commercial	Negative	10	7	10	-27		RAW264.7	2600	A	Mouse	Ascites	Monocyte/Macrophage	Adult	L	24	1000	CellTiterBlue	AlamarBlue		22.617		2	10.5402/2012/454072
65	2012	SiO2	I	Sphere	None	Commercial	Negative	10	7	10	-27		RAW264.7	2600	A	Mouse	Ascites	Monocyte/Macrophage	Adult	L	24	1	XTT	TetrazoliumSalt		123.42		2	10.5402/2012/454072
66	2012	SiO2	I	Sphere	None	Commercial	Negative	10	7	10	-27		RAW264.7	2600	A	Mouse	Ascites	Monocyte/Macrophage	Adult	L	24	10	XTT	TetrazoliumSalt		114.38		2	10.5402/2012/454072
67	2012	SiO2	I	Sphere	None	Commercial	Negative	10	7	10	-27		RAW264.7	2600	A	Mouse	Ascites	Monocyte/Macrophage	Adult	L	24	100	XTT	TetrazoliumSalt		82.714		2	10.5402/2012/454072
68	2012	SiO2	I	Sphere	None	Commercial	Negative	10	7	10	-27		RAW264.7	2600	A	Mouse	Ascites	Monocyte/Macrophage	Adult	L	24	1000	XTT	TetrazoliumSalt		25.525		2	10.5402/2012/454072
69	2012	SiO2	I	Sphere	None	Commercial	Negative	10	7	10	-27		RAW264.7	2600	A	Mouse	Ascites	Monocyte/Macrophage	Adult	L	24	1	LDH	LDHrelease		4.5234		2	10.5402/2012/454072
70	2012	SiO2	I	Sphere	None	Commercial	Negative	10	7	10	-27		RAW264.7	2600	A	Mouse	Ascites	Monocyte/Macrophage	Adult	L	24	10	LDH	LDHrelease		6.1389		2	10.5402/2012/454072
71	2012	SiO2	I	Sphere	None	Commercial	Negative	10	7	10	-27		RAW264.7	2600	A	Mouse	Ascites	Monocyte/Macrophage	Adult	L	24	100	LDH	LDHrelease		22.294		2	10.5402/2012/454072
72	2012	SiO2	I	Sphere	None	Commercial	Negative	10	7	10	-27		RAW264.7	2600	A	Mouse	Ascites	Monocyte/Macrophage	Adult	L	24	1000	LDH	LDHrelease		69.467		2	10.5402/2012/454072
73	2012	SiO2	I	Sphere	None	Commercial	Negative	10	7	10	-27		RAW264.7	6000	A	Mouse	Ascites	Monocyte/Macrophage	Adult	L	24	1	Live/Dead	PropidiumIodide		95.315		2	10.5402/2012/454072
74	2012	SiO2	I	Sphere	None	Commercial	Negative	10	7	10	-27		RAW264.7	6000	A	Mouse	Ascites	Monocyte/Macrophage	Adult	L	24	10	Live/Dead	PropidiumIodide		86.268		2	10.5402/2012/454072
75	2012	SiO2	I	Sphere	None	Commercial	Negative	10	7	10	-27		RAW264.7	6000	A	Mouse	Ascites	Monocyte/Macrophage	Adult	L	24	100	Live/Dead	PropidiumIodide		69.467		2	10.5402/2012/454072
76	2012	SiO2	I	Sphere	None	Commercial	Negative	10	7	10	-27		RAW264.7	6000	A	Mouse	Ascites	Monocyte/Macrophage	Adult	L	24	1000	Live/Dead	PropidiumIodide		9.6931		2	10.5402/2012/454072
77	2012	SiO2	I	Sphere	None	Commercial	Negative	10	7	10	-27		RAW264.7	6000	A	Mouse	Ascites	Monocyte/Macrophage	Adult	L	24	1	Live/Dead	CalceinAM		94.023		2	10.5402/2012/454072
78	2012	SiO2	I	Sphere	None	Commercial	Negative	10	7	10	-27		RAW264.7	6000	A	Mouse	Ascites	Monocyte/Macrophage	Adult	L	24	10	Live/Dead	CalceinAM		91.761		2	10.5402/2012/454072
79	2012	SiO2	I	Sphere	None	Commercial	Negative	10	7	10	-27		RAW264.7	6000	A	Mouse	Ascites	Monocyte/Macrophage	Adult	L	24	100	Live/Dead	CalceinAM		71.729		2	10.5402/2012/454072
80	2012	SiO2	I	Sphere	None	Commercial	Negative	10	7	10	-27		RAW264.7	6000	A	Mouse	Ascites	Monocyte/Macrophage	Adult	L	24	1000	Live/Dead	CalceinAM		44.265		2	10.5402/2012/454072
81	2015	QD	I	Sphere	DPA	Precipitation	Neutral	5.4					SVEC4-10		A	Mouse	Axillary Lymph Node	Epithelial	Adult	L	24		MTS	TetrazoliumSalt		105.33		3	10.3762/bjnano.6.28
82	2015	QD	I	Sphere	DPA	Precipitation	Neutral	5.4					SVEC4-10		A	Mouse	Axillary Lymph Node	Epithelial	Adult	L	24		MTS	TetrazoliumSalt		89.73		3	10.3762/bjnano.6.28
83	2015	QD	I	Sphere	DPA	Precipitation	Neutral	5.4					J774A.1		A	Mouse	Ascites	Macrophage	Adult	L	24		MTS	TetrazoliumSalt		109.52		3	10.3762/bjnano.6.28
84	2015	QD	I	Sphere	DPA	Precipitation	Neutral	5.4					J774A.1		A	Mouse	Ascites	Macrophage	Adult	L	24		MTS	TetrazoliumSalt		112.26		3	10.3762/bjnano.6.28
85	2015	QD	I	Sphere	MPA	Precipitation	Negative	5.4					SVEC4-10		A	Mouse	Axillary Lymph Node	Epithelial	Adult	L	24		MTS	TetrazoliumSalt		93.591		3	10.3762/bjnano.6.28
86	2015	QD	I	Sphere	MPA	Precipitation	Negative	5.4					SVEC4-10		A	Mouse	Axillary Lymph Node	Epithelial	Adult	L	24		MTS	TetrazoliumSalt		45.56		3	10.3762/bjnano.6.28
87	2015	QD	I	Sphere	MPA	Precipitation	Negative	5.4					J774A.1		A	Mouse	Ascites	Macrophage	Adult	L	24		MTS	TetrazoliumSalt		111.61		3	10.3762/bjnano.6.28
88	2015	QD	I	Sphere	MPA	Precipitation	Negative	5.4					J774A.1		A	Mouse	Ascites	Macrophage	Adult	L	24		MTS	TetrazoliumSalt		57.419		3	10.3762/bjnano.6.28
89	2015	QD	I	Sphere	CyA	Precipitation	Positive	5.4					SVEC4-10		A	Mouse	Axillary Lymph Node	Epithelial	Adult	L	24		MTS	TetrazoliumSalt		29.961		3	10.3762/bjnano.6.28
90	2015	QD	I	Sphere	CyA	Precipitation	Positive	5.4					SVEC4-10		A	Mouse	Axillary Lymph Node	Epithelial	Adult	L	24		MTS	TetrazoliumSalt		25.019		3	10.3762/bjnano.6.28
91	2015	QD	I	Sphere	CyA	Precipitation	Positive	5.4					J774A.1		A	Mouse	Ascites	Macrophage	Adult	L	24		MTS	TetrazoliumSalt		86.129		3	10.3762/bjnano.6.28
92	2015	QD	I	Sphere	CyA	Precipitation	Positive	5.4					J774A.1		A	Mouse	Ascites	Macrophage	Adult	L	24		MTS	TetrazoliumSalt		22.581		3	10.3762/bjnano.6.28
93	2014	IronOxide	I	Sphere	Dextran	Thermal Decomposition		18	170				VERO	10000	A	Monkey	Kidney	Epithelial	Adult	L	24	100	MTT	TetrazoliumSalt		102		4	10.1002/jbm.b.33068
94	2014	IronOxide	I	Sphere	Dextran	Thermal Decomposition		18	170				VERO	10000	A	Monkey	Kidney	Epithelial	Adult	L	24	200	MTT	TetrazoliumSalt		105.08		4	10.1002/jbm.b.33068
95	2014	IronOxide	I	Sphere	Dextran	Thermal Decomposition		18	170				VERO	10000	A	Monkey	Kidney	Epithelial	Adult	L	24	300	MTT	TetrazoliumSalt		100		4	10.1002/jbm.b.33068
96	2014	IronOxide	I	Sphere	Dextran	Thermal Decomposition		18	170				VERO	10000	A	Monkey	Kidney	Epithelial	Adult	L	24	400	MTT	TetrazoliumSalt		100		4	10.1002/jbm.b.33068
97	2014	IronOxide	I	Sphere	Dextran	Thermal Decomposition		18	170				VERO	10000	A	Monkey	Kidney	Epithelial	Adult	L	24	500	MTT	TetrazoliumSalt		80		4	10.1002/jbm.b.33068
98	2014	IronOxide	I	Sphere	Dextran	Thermal Decomposition		18	170				MDCK	10000	A	Dog	Kidney	Epithelial	Adult	L	24	100	MTT	TetrazoliumSalt		101.97		4	10.1002/jbm.b.33068
99	2014	IronOxide	I	Sphere	Dextran	Thermal Decomposition		18	170				MDCK	10000	A	Dog	Kidney	Epithelial	Adult	L	24	200	MTT	TetrazoliumSalt		115.09		4	10.1002/jbm.b.33068
100	2014	IronOxide	I	Sphere	Dextran	Thermal Decomposition		18	170				MDCK	10000	A	Dog	Kidney	Epithelial	Adult	L	24	300	MTT	TetrazoliumSalt		115.09		4	10.1002/jbm.b.33068
101	2014	IronOxide	I	Sphere	Dextran	Thermal Decomposition		18	170				MDCK	10000	A	Dog	Kidney	Epithelial	Adult	L	24	400	MTT	TetrazoliumSalt		100.1		4	10.1002/jbm.b.33068
102	2014	IronOxide	I	Sphere	Dextran	Thermal Decomposition		18	170				MDCK	10000	A	Dog	Kidney	Epithelial	Adult	L	24	500	MTT	TetrazoliumSalt		118.08		4	10.1002/jbm.b.33068
103	2014	IronOxide	I	Sphere	PEG	Thermal Decomposition		18	120				MDCK	10000	A	Dog	Kidney	Epithelial	Adult	L	24	100	MTT	TetrazoliumSalt		80		4	10.1002/jbm.b.33068
104	2014	IronOxide	I	Sphere	PEG	Thermal Decomposition		18	120				MDCK	10000	A	Dog	Kidney	Epithelial	Adult	L	24	200	MTT	TetrazoliumSalt		75.077		4	10.1002/jbm.b.33068
105	2014	IronOxide	I	Sphere	PEG	Thermal Decomposition		18	120				MDCK	10000	A	Dog	Kidney	Epithelial	Adult	L	24	300	MTT	TetrazoliumSalt		50		4	10.1002/jbm.b.33068
106	2014	IronOxide	I	Sphere	PEG	Thermal Decomposition		18	120				MDCK	10000	A	Dog	Kidney	Epithelial	Adult	L	24	400	MTT	TetrazoliumSalt		38		4	10.1002/jbm.b.33068
107	2014	IronOxide	I	Sphere	PEG	Thermal Decomposition		18	120				MDCK	10000	A	Dog	Kidney	Epithelial	Adult	L	24	500	MTT	TetrazoliumSalt		34.923		4	10.1002/jbm.b.33068
108	2014	IronOxide	I	Sphere	PEG	Thermal Decomposition		18	120				MDCK	10000	A	Dog	Kidney	Epithelial	Adult	L	24	100	MTT	TetrazoliumSalt		89.986		4	10.1002/jbm.b.33068
109	2014	IronOxide	I	Sphere	PEG	Thermal Decomposition		18	120				MDCK	10000	A	Dog	Kidney	Epithelial	Adult	L	24	200	MTT	TetrazoliumSalt		80.245		4	10.1002/jbm.b.33068
110	2014	IronOxide	I	Sphere	PEG	Thermal Decomposition		18	120				MDCK	10000	A	Dog	Kidney	Epithelial	Adult	L	24	300	MTT	TetrazoliumSalt		31.916		4	10.1002/jbm.b.33068
111	2014	IronOxide	I	Sphere	PEG	Thermal Decomposition		18	120				MDCK	10000	A	Dog	Kidney	Epithelial	Adult	L	24	400	MTT	TetrazoliumSalt		30.043		4	10.1002/jbm.b.33068
112	2014	IronOxide	I	Sphere	PEG	Thermal Decomposition		18	120				MDCK	10000	A	Dog	Kidney	Epithelial	Adult	L	24	500	MTT	TetrazoliumSalt		30.043		4	10.1002/jbm.b.33068
113	2012	Bi	I	Sphere	None	Precipitation		20					HeLa	20000	H	Human	Cervix	Epithelial	Adult	L	24		Live/Dead	CalceinAM		97.16		5	10.1007/s10856-012-4716-1
114	2012	Bi	I	Sphere	None	Precipitation		20					HeLa	20000	H	Human	Cervix	Epithelial	Adult	L	24		Live/Dead	CalceinAM		86.296		5	10.1007/s10856-012-4716-1
115	2012	Bi	I	Sphere	None	Precipitation		20					HeLa	20000	H	Human	Cervix	Epithelial	Adult	L	24		Live/Dead	CalceinAM		55.802		5	10.1007/s10856-012-4716-1
116	2012	Bi	I	Sphere	None	Precipitation		20					MG-63	20000	H	Human	Bone	Fibroblast	Adult	L	24		Live/Dead	CalceinAM		99.256		5	10.1007/s10856-012-4716-1
117	2012	Bi	I	Sphere	None	Precipitation		20					MG-63	20000	H	Human	Bone	Fibroblast	Adult	L	24		Live/Dead	CalceinAM		87.593		5	10.1007/s10856-012-4716-1
118	2012	Bi	I	Sphere	None	Precipitation		20					MG-63	20000	H	Human	Bone	Fibroblast	Adult	L	24		Live/Dead	CalceinAM		71.712		5	10.1007/s10856-012-4716-1
119	2012	Bi	I	Sphere	None	Precipitation		20					HeLa	20000	H	Human	Cervix	Epithelial	Adult	L	24		MTT	TetrazoliumSalt		95.11		5	10.1007/s10856-012-4716-1
120	2012	Bi	I	Sphere	None	Precipitation		20					HeLa	20000	H	Human	Cervix	Epithelial	Adult	L	24		MTT	TetrazoliumSalt		87.164		5	10.1007/s10856-012-4716-1
121	2012	Bi	I	Sphere	None	Precipitation		20					HeLa	20000	H	Human	Cervix	Epithelial	Adult	L	24		MTT	TetrazoliumSalt		54.156		5	10.1007/s10856-012-4716-1
122	2012	Bi	I	Sphere	None	Precipitation		20					MG-63	20000	H	Human	Bone	Fibroblast	Adult	L	24		MTT	TetrazoliumSalt		96.429		5	10.1007/s10856-012-4716-1
123	2012	Bi	I	Sphere	None	Precipitation		20					MG-63	20000	H	Human	Bone	Fibroblast	Adult	L	24		MTT	TetrazoliumSalt		92.989		5	10.1007/s10856-012-4716-1
124	2012	Bi	I	Sphere	None	Precipitation		20					MG-63	20000	H	Human	Bone	Fibroblast	Adult	L	24		MTT	TetrazoliumSalt		67.857		5	10.1007/s10856-012-4716-1
125	2012	Bi	I	Sphere	NH2	Precipitation		20					HeLa	20000	H	Human	Cervix	Epithelial	Adult	L	24		Live/Dead	CalceinAM		99.383		5	10.1007/s10856-012-4716-1
126	2012	Bi	I	Sphere	NH2	Precipitation		20					HeLa	20000	H	Human	Cervix	Epithelial	Adult	L	24		Live/Dead	CalceinAM		70		5	10.1007/s10856-012-4716-1
127	2012	Bi	I	Sphere	NH2	Precipitation		20					HeLa	20000	H	Human	Cervix	Epithelial	Adult	L	24		Live/Dead	CalceinAM		48.642		5	10.1007/s10856-012-4716-1
128	2012	Bi	I	Sphere	NH2	Precipitation		20					MG-63	20000	H	Human	Bone	Fibroblast	Adult	L	24		Live/Dead	CalceinAM		99.256		5	10.1007/s10856-012-4716-1
129	2012	Bi	I	Sphere	NH2	Precipitation		20					MG-63	20000	H	Human	Bone	Fibroblast	Adult	L	24		Live/Dead	CalceinAM		82.878		5	10.1007/s10856-012-4716-1
130	2012	Bi	I	Sphere	NH2	Precipitation		20					MG-63	20000	H	Human	Bone	Fibroblast	Adult	L	24		Live/Dead	CalceinAM		77.916		5	10.1007/s10856-012-4716-1
131	2012	Bi	I	Sphere	NH2	Precipitation		20					HeLa	20000	H	Human	Cervix	Epithelial	Adult	L	24		MTT	TetrazoliumSalt		93.521		5	10.1007/s10856-012-4716-1
132	2012	Bi	I	Sphere	NH2	Precipitation		20					HeLa	20000	H	Human	Cervix	Epithelial	Adult	L	24		MTT	TetrazoliumSalt		78.24		5	10.1007/s10856-012-4716-1
133	2012	Bi	I	Sphere	NH2	Precipitation		20					HeLa	20000	H	Human	Cervix	Epithelial	Adult	L	24		MTT	TetrazoliumSalt		48.533		5	10.1007/s10856-012-4716-1
134	2012	Bi	I	Sphere	NH2	Precipitation		20					MG-63	20000	H	Human	Bone	Fibroblast	Adult	L	24		MTT	TetrazoliumSalt		93.651		5	10.1007/s10856-012-4716-1
135	2012	Bi	I	Sphere	NH2	Precipitation		20					MG-63	20000	H	Human	Bone	Fibroblast	Adult	L	24		MTT	TetrazoliumSalt		83.73		5	10.1007/s10856-012-4716-1
136	2012	Bi	I	Sphere	NH2	Precipitation		20					MG-63	20000	H	Human	Bone	Fibroblast	Adult	L	24		MTT	TetrazoliumSalt		71.825		5	10.1007/s10856-012-4716-1
137	2012	Bi	I	Sphere	Silica	Precipitation		20					HeLa	20000	H	Human	Cervix	Epithelial	Adult	L	24		Live/Dead	CalceinAM		99.383		5	10.1007/s10856-012-4716-1
138	2012	Bi	I	Sphere	Silica	Precipitation		20					HeLa	20000	H	Human	Cervix	Epithelial	Adult	L	24		Live/Dead	CalceinAM		83.951		5	10.1007/s10856-012-4716-1
139	2012	Bi	I	Sphere	Silica	Precipitation		20					HeLa	20000	H	Human	Cervix	Epithelial	Adult	L	24		Live/Dead	CalceinAM		59.506		5	10.1007/s10856-012-4716-1
140	2012	Bi	I	Sphere	Silica	Precipitation		20					MG-63	20000	H	Human	Bone	Fibroblast	Adult	L	24		Live/Dead	CalceinAM		98.511		5	10.1007/s10856-012-4716-1
141	2012	Bi	I	Sphere	Silica	Precipitation		20					MG-63	20000	H	Human	Bone	Fibroblast	Adult	L	24		Live/Dead	CalceinAM		94.169		5	10.1007/s10856-012-4716-1
142	2012	Bi	I	Sphere	Silica	Precipitation		20					MG-63	20000	H	Human	Bone	Fibroblast	Adult	L	24		Live/Dead	CalceinAM		77.171		5	10.1007/s10856-012-4716-1
143	2012	Bi	I	Sphere	Silica	Precipitation		20					HeLa	20000	H	Human	Cervix	Epithelial	Adult	L	24		MTT	TetrazoliumSalt		99.389		5	10.1007/s10856-012-4716-1
144	2012	Bi	I	Sphere	Silica	Precipitation		20					HeLa	20000	H	Human	Cervix	Epithelial	Adult	L	24		MTT	TetrazoliumSalt		92.176		5	10.1007/s10856-012-4716-1
145	2012	Bi	I	Sphere	Silica	Precipitation		20					HeLa	20000	H	Human	Cervix	Epithelial	Adult	L	24		MTT	TetrazoliumSalt		63.692		5	10.1007/s10856-012-4716-1
146	2012	Bi	I	Sphere	Silica	Precipitation		20					MG-63	20000	H	Human	Bone	Fibroblast	Adult	L	24		MTT	TetrazoliumSalt		98.28		5	10.1007/s10856-012-4716-1
147	2012	Bi	I	Sphere	Silica	Precipitation		20					MG-63	20000	H	Human	Bone	Fibroblast	Adult	L	24		MTT	TetrazoliumSalt		93.519		5	10.1007/s10856-012-4716-1
148	2012	Bi	I	Sphere	Silica	Precipitation		20					MG-63	20000	H	Human	Bone	Fibroblast	Adult	L	24		MTT	TetrazoliumSalt		75.529		5	10.1007/s10856-012-4716-1
149	2012	Bi	I	Sphere	PEG	Precipitation		20					HeLa	20000	H	Human	Cervix	Epithelial	Adult	L	24		Live/Dead	CalceinAM		98.395		5	10.1007/s10856-012-4716-1
150	2012	Bi	I	Sphere	PEG	Precipitation		20					HeLa	20000	H	Human	Cervix	Epithelial	Adult	L	24		Live/Dead	CalceinAM		87.778		5	10.1007/s10856-012-4716-1
151	2012	Bi	I	Sphere	PEG	Precipitation		20					HeLa	20000	H	Human	Cervix	Epithelial	Adult	L	24		Live/Dead	CalceinAM		66.667		5	10.1007/s10856-012-4716-1
152	2012	Bi	I	Sphere	PEG	Precipitation		20					MG-63	20000	H	Human	Bone	Fibroblast	Adult	L	24		Live/Dead	CalceinAM		98.387		5	10.1007/s10856-012-4716-1
153	2012	Bi	I	Sphere	PEG	Precipitation		20					MG-63	20000	H	Human	Bone	Fibroblast	Adult	L	24		Live/Dead	CalceinAM		91.935		5	10.1007/s10856-012-4716-1
154	2012	Bi	I	Sphere	PEG	Precipitation		20					MG-63	20000	H	Human	Bone	Fibroblast	Adult	L	24		Live/Dead	CalceinAM		78.164		5	10.1007/s10856-012-4716-1
155	2012	Bi	I	Sphere	PEG	Precipitation		20					HeLa	20000	H	Human	Cervix	Epithelial	Adult	L	24		MTT	TetrazoliumSalt		96.21		5	10.1007/s10856-012-4716-1
156	2012	Bi	I	Sphere	PEG	Precipitation		20					HeLa	20000	H	Human	Cervix	Epithelial	Adult	L	24		MTT	TetrazoliumSalt		88.875		5	10.1007/s10856-012-4716-1
157	2012	Bi	I	Sphere	PEG	Precipitation		20					HeLa	20000	H	Human	Cervix	Epithelial	Adult	L	24		MTT	TetrazoliumSalt		72.983		5	10.1007/s10856-012-4716-1
158	2012	Bi	I	Sphere	PEG	Precipitation		20					MG-63	20000	H	Human	Bone	Fibroblast	Adult	L	24		MTT	TetrazoliumSalt		97.354		5	10.1007/s10856-012-4716-1
159	2012	Bi	I	Sphere	PEG	Precipitation		20					MG-63	20000	H	Human	Bone	Fibroblast	Adult	L	24		MTT	TetrazoliumSalt		92.063		5	10.1007/s10856-012-4716-1
160	2012	Bi	I	Sphere	PEG	Precipitation		20					MG-63	20000	H	Human	Bone	Fibroblast	Adult	L	24		MTT	TetrazoliumSalt		78.175		5	10.1007/s10856-012-4716-1
161	2012	Bi	I	Sphere	None	Precipitation		20					HeLa	20000	H	Human	Cervix	Epithelial	Adult	L	12		Live/Dead	CalceinAM		90.617		5	10.1007/s10856-012-4716-1
162	2012	Bi	I	Sphere	None	Precipitation		20					HeLa	20000	H	Human	Cervix	Epithelial	Adult	L	24		Live/Dead	CalceinAM		75.802		5	10.1007/s10856-012-4716-1
163	2012	Bi	I	Sphere	None	Precipitation		20					HeLa	20000	H	Human	Cervix	Epithelial	Adult	L	48		Live/Dead	CalceinAM		55.556		5	10.1007/s10856-012-4716-1
164	2012	Bi	I	Sphere	None	Precipitation		20					HeLa	20000	H	Human	Cervix	Epithelial	Adult	L	72		Live/Dead	CalceinAM		34.568		5	10.1007/s10856-012-4716-1
165	2012	Bi	I	Sphere	None	Precipitation		20					HeLa	20000	H	Human	Cervix	Epithelial	Adult	L	96		Live/Dead	CalceinAM		22.963		5	10.1007/s10856-012-4716-1
166	2012	Bi	I	Sphere	None	Precipitation		20					MG-63	20000	H	Human	Bone	Fibroblast	Adult	L	12		Live/Dead	CalceinAM		93.223		5	10.1007/s10856-012-4716-1
167	2012	Bi	I	Sphere	None	Precipitation		20					MG-63	20000	H	Human	Bone	Fibroblast	Adult	L	24		Live/Dead	CalceinAM		87.414		5	10.1007/s10856-012-4716-1
168	2012	Bi	I	Sphere	None	Precipitation		20					MG-63	20000	H	Human	Bone	Fibroblast	Adult	L	48		Live/Dead	CalceinAM		71.369		5	10.1007/s10856-012-4716-1
169	2012	Bi	I	Sphere	None	Precipitation		20					MG-63	20000	H	Human	Bone	Fibroblast	Adult	L	72		Live/Dead	CalceinAM		54.633		5	10.1007/s10856-012-4716-1
170	2012	Bi	I	Sphere	None	Precipitation		20					MG-63	20000	H	Human	Bone	Fibroblast	Adult	L	96		Live/Dead	CalceinAM		45.92		5	10.1007/s10856-012-4716-1
171	2012	Bi	I	Sphere	NH2	Precipitation		20					HeLa	20000	H	Human	Cervix	Epithelial	Adult	L	12		Live/Dead	CalceinAM		91.111		5	10.1007/s10856-012-4716-1
172	2012	Bi	I	Sphere	NH2	Precipitation		20					HeLa	20000	H	Human	Cervix	Epithelial	Adult	L	24		Live/Dead	CalceinAM		69.63		5	10.1007/s10856-012-4716-1
173	2012	Bi	I	Sphere	NH2	Precipitation		20					HeLa	20000	H	Human	Cervix	Epithelial	Adult	L	48		Live/Dead	CalceinAM		48.519		5	10.1007/s10856-012-4716-1
174	2012	Bi	I	Sphere	NH2	Precipitation		20					HeLa	20000	H	Human	Cervix	Epithelial	Adult	L	72		Live/Dead	CalceinAM		22.346		5	10.1007/s10856-012-4716-1
175	2012	Bi	I	Sphere	NH2	Precipitation		20					HeLa	20000	H	Human	Cervix	Epithelial	Adult	L	96		Live/Dead	CalceinAM		5.8025		5	10.1007/s10856-012-4716-1
176	2012	Bi	I	Sphere	NH2	Precipitation		20					MG-63	20000	H	Human	Bone	Fibroblast	Adult	L	12		Live/Dead	CalceinAM		92.531		5	10.1007/s10856-012-4716-1
177	2012	Bi	I	Sphere	NH2	Precipitation		20					MG-63	20000	H	Human	Bone	Fibroblast	Adult	L	24		Live/Dead	CalceinAM		82.434		5	10.1007/s10856-012-4716-1
178	2012	Bi	I	Sphere	NH2	Precipitation		20					MG-63	20000	H	Human	Bone	Fibroblast	Adult	L	48		Live/Dead	CalceinAM		69.848		5	10.1007/s10856-012-4716-1
179	2012	Bi	I	Sphere	NH2	Precipitation		20					MG-63	20000	H	Human	Bone	Fibroblast	Adult	L	72		Live/Dead	CalceinAM		58.091		5	10.1007/s10856-012-4716-1
180	2012	Bi	I	Sphere	NH2	Precipitation		20					MG-63	20000	H	Human	Bone	Fibroblast	Adult	L	96		Live/Dead	CalceinAM		34.44		5	10.1007/s10856-012-4716-1
181	2012	Bi	I	Sphere	Silica	Precipitation		20					HeLa	20000	H	Human	Cervix	Epithelial	Adult	L	12		Live/Dead	CalceinAM		92.593		5	10.1007/s10856-012-4716-1
182	2012	Bi	I	Sphere	Silica	Precipitation		20					HeLa	20000	H	Human	Cervix	Epithelial	Adult	L	24		Live/Dead	CalceinAM		83.951		5	10.1007/s10856-012-4716-1
183	2012	Bi	I	Sphere	Silica	Precipitation		20					HeLa	20000	H	Human	Cervix	Epithelial	Adult	L	48		Live/Dead	CalceinAM		59.259		5	10.1007/s10856-012-4716-1
184	2012	Bi	I	Sphere	Silica	Precipitation		20					HeLa	20000	H	Human	Cervix	Epithelial	Adult	L	72		Live/Dead	CalceinAM		46.914		5	10.1007/s10856-012-4716-1
185	2012	Bi	I	Sphere	Silica	Precipitation		20					HeLa	20000	H	Human	Cervix	Epithelial	Adult	L	96		Live/Dead	CalceinAM		32.593		5	10.1007/s10856-012-4716-1
186	2012	Bi	I	Sphere	Silica	Precipitation		20					MG-63	20000	H	Human	Bone	Fibroblast	Adult	L	12		Live/Dead	CalceinAM		94.053		5	10.1007/s10856-012-4716-1
187	2012	Bi	I	Sphere	Silica	Precipitation		20					MG-63	20000	H	Human	Bone	Fibroblast	Adult	L	24		Live/Dead	CalceinAM		93.776		5	10.1007/s10856-012-4716-1
188	2012	Bi	I	Sphere	Silica	Precipitation		20					MG-63	20000	H	Human	Bone	Fibroblast	Adult	L	48		Live/Dead	CalceinAM		77.04		5	10.1007/s10856-012-4716-1
189	2012	Bi	I	Sphere	Silica	Precipitation		20					MG-63	20000	H	Human	Bone	Fibroblast	Adult	L	72		Live/Dead	CalceinAM		63.209		5	10.1007/s10856-012-4716-1
190	2012	Bi	I	Sphere	Silica	Precipitation		20					MG-63	20000	H	Human	Bone	Fibroblast	Adult	L	96		Live/Dead	CalceinAM		56.708		5	10.1007/s10856-012-4716-1
191	2012	Bi	I	Sphere	PEG	Precipitation		20					HeLa	20000	H	Human	Cervix	Epithelial	Adult	L	12		Live/Dead	CalceinAM		90.617		5	10.1007/s10856-012-4716-1
192	2012	Bi	I	Sphere	PEG	Precipitation		20					HeLa	20000	H	Human	Cervix	Epithelial	Adult	L	24		Live/Dead	CalceinAM		85.185		5	10.1007/s10856-012-4716-1
193	2012	Bi	I	Sphere	PEG	Precipitation		20					HeLa	20000	H	Human	Cervix	Epithelial	Adult	L	48		Live/Dead	CalceinAM		66.173		5	10.1007/s10856-012-4716-1
194	2012	Bi	I	Sphere	PEG	Precipitation		20					HeLa	20000	H	Human	Cervix	Epithelial	Adult	L	72		Live/Dead	CalceinAM		54.815		5	10.1007/s10856-012-4716-1
195	2012	Bi	I	Sphere	PEG	Precipitation		20					HeLa	20000	H	Human	Cervix	Epithelial	Adult	L	96		Live/Dead	CalceinAM		46.173		5	10.1007/s10856-012-4716-1
196	2012	Bi	I	Sphere	PEG	Precipitation		20					MG-63	20000	H	Human	Bone	Fibroblast	Adult	L	12		Live/Dead	CalceinAM		95.021		5	10.1007/s10856-012-4716-1
197	2012	Bi	I	Sphere	PEG	Precipitation		20					MG-63	20000	H	Human	Bone	Fibroblast	Adult	L	24		Live/Dead	CalceinAM		91.425		5	10.1007/s10856-012-4716-1
198	2012	Bi	I	Sphere	PEG	Precipitation		20					MG-63	20000	H	Human	Bone	Fibroblast	Adult	L	48		Live/Dead	CalceinAM		77.87		5	10.1007/s10856-012-4716-1
199	2012	Bi	I	Sphere	PEG	Precipitation		20					MG-63	20000	H	Human	Bone	Fibroblast	Adult	L	72		Live/Dead	CalceinAM		66.667		5	10.1007/s10856-012-4716-1
200	2012	Bi	I	Sphere	PEG	Precipitation		20					MG-63	20000	H	Human	Bone	Fibroblast	Adult	L	96		Live/Dead	CalceinAM		54.08		5	10.1007/s10856-012-4716-1
201	2010	Au	I	Sphere	None	Chemical Reduction	Positive	2	9.31		24.4		BEC	15000	H	Human	Lung	Epithelial	Adult	P	24		MTS	TetrazoliumSalt		28.349		6	10.1021/nl101140t
202	2010	Au	I	Sphere	None	Chemical Reduction	Positive	2	9.31		24.4		ASM	15000	H	Human	Lung	Spindle	Adult	P	24		MTS	TetrazoliumSalt		54.984		6	10.1021/nl101140t
203	2010	Au	I	Sphere	None	Chemical Reduction	Positive	2	9.31		24.4		BEC	15000	H	Human	Lung	Epithelial	Adult	P	24		MTS	TetrazoliumSalt		24.611		6	10.1021/nl101140t
204	2010	Au	I	Sphere	None	Chemical Reduction	Positive	2	9.31		24.4		ASM	15000	H	Human	Lung	Spindle	Adult	P	24		MTS	TetrazoliumSalt		30.218		6	10.1021/nl101140t
205	2010	Au	I	Sphere	None	Chemical Reduction	Positive	2	9.31		24.4		BEC	15000	H	Human	Lung	Epithelial	Adult	P	24		MTS	TetrazoliumSalt		21.028		6	10.1021/nl101140t
206	2010	Au	I	Sphere	None	Chemical Reduction	Positive	2	9.31		24.4		ASM	15000	H	Human	Lung	Spindle	Adult	P	24		MTS	TetrazoliumSalt		19.938		6	10.1021/nl101140t
207	2012	Ag	I	Sphere	CKK	Precipitation		20					Caco-2	10000	H	Human	Colon	Epithelial	Adult	L	24	5	CellTiterBlue	AlamarBlue		88.421		7	10.1007/s00204-012-0840-4
208	2012	Ag	I	Sphere	CKK	Precipitation		20					Caco-2	10000	H	Human	Colon	Epithelial	Adult	L	30	5	CellTiterBlue	AlamarBlue		78.421		7	10.1007/s00204-012-0840-4
209	2012	Ag	I	Sphere	CKK	Precipitation		20					Caco-2	10000	H	Human	Colon	Epithelial	Adult	L	48	5	CellTiterBlue	AlamarBlue		39.737		7	10.1007/s00204-012-0840-4
210	2012	Ag	I	Sphere	CKK	Precipitation		20					Caco-2	10000	H	Human	Colon	Epithelial	Adult	L	24	10	CellTiterBlue	AlamarBlue		68.158		7	10.1007/s00204-012-0840-4
211	2012	Ag	I	Sphere	CKK	Precipitation		20					Caco-2	10000	H	Human	Colon	Epithelial	Adult	L	30	10	CellTiterBlue	AlamarBlue		49.737		7	10.1007/s00204-012-0840-4
212	2012	Ag	I	Sphere	CKK	Precipitation		20					Caco-2	10000	H	Human	Colon	Epithelial	Adult	L	48	10	CellTiterBlue	AlamarBlue		24.474		7	10.1007/s00204-012-0840-4
213	2012	Ag	I	Sphere	CKK	Precipitation		20					Caco-2	10000	H	Human	Colon	Epithelial	Adult	L	24	25	CellTiterBlue	AlamarBlue		33.947		7	10.1007/s00204-012-0840-4
214	2012	Ag	I	Sphere	CKK	Precipitation		20					Caco-2	10000	H	Human	Colon	Epithelial	Adult	L	30	25	CellTiterBlue	AlamarBlue		5.5263		7	10.1007/s00204-012-0840-4
215	2012	Ag	I	Sphere	CKK	Precipitation		20					Caco-2	10000	H	Human	Colon	Epithelial	Adult	L	48	25	CellTiterBlue	AlamarBlue		4.2105		7	10.1007/s00204-012-0840-4
216	2012	Ag	I	Sphere	CKK	Precipitation		20					Caco-2	10000	H	Human	Colon	Epithelial	Adult	L	24	50	CellTiterBlue	AlamarBlue		20.526		7	10.1007/s00204-012-0840-4
217	2012	Ag	I	Sphere	CKK	Precipitation		20					Caco-2	10000	H	Human	Colon	Epithelial	Adult	L	30	50	CellTiterBlue	AlamarBlue		0.26316		7	10.1007/s00204-012-0840-4
218	2012	Ag	I	Sphere	CKK	Precipitation		20					Caco-2	10000	H	Human	Colon	Epithelial	Adult	L	48	50	CellTiterBlue	AlamarBlue		2.6316		7	10.1007/s00204-012-0840-4
219	2012	Ag	I	Sphere	CKK	Precipitation		20					Caco-2	10000	H	Human	Colon	Epithelial	Adult	L	24	100	CellTiterBlue	AlamarBlue		10.789		7	10.1007/s00204-012-0840-4
220	2012	Ag	I	Sphere	CKK	Precipitation		20					Caco-2	10000	H	Human	Colon	Epithelial	Adult	L	30	100	CellTiterBlue	AlamarBlue		0.26316		7	10.1007/s00204-012-0840-4
221	2012	Ag	I	Sphere	CKK	Precipitation		20					Caco-2	10000	H	Human	Colon	Epithelial	Adult	L	48	100	CellTiterBlue	AlamarBlue		2.3684		7	10.1007/s00204-012-0840-4
222	2012	Ag	I	Sphere	CKK	Precipitation		40					Caco-2	10000	H	Human	Colon	Epithelial	Adult	L	24	5	CellTiterBlue	AlamarBlue		107.42		7	10.1007/s00204-012-0840-4
223	2012	Ag	I	Sphere	CKK	Precipitation		40					Caco-2	10000	H	Human	Colon	Epithelial	Adult	L	30	5	CellTiterBlue	AlamarBlue		98.516		7	10.1007/s00204-012-0840-4
224	2012	Ag	I	Sphere	CKK	Precipitation		40					Caco-2	10000	H	Human	Colon	Epithelial	Adult	L	48	5	CellTiterBlue	AlamarBlue		96.142		7	10.1007/s00204-012-0840-4
225	2012	Ag	I	Sphere	CKK	Precipitation		40					Caco-2	10000	H	Human	Colon	Epithelial	Adult	L	24	10	CellTiterBlue	AlamarBlue		101.09		7	10.1007/s00204-012-0840-4
226	2012	Ag	I	Sphere	CKK	Precipitation		40					Caco-2	10000	H	Human	Colon	Epithelial	Adult	L	30	10	CellTiterBlue	AlamarBlue		90.603		7	10.1007/s00204-012-0840-4
227	2012	Ag	I	Sphere	CKK	Precipitation		40					Caco-2	10000	H	Human	Colon	Epithelial	Adult	L	48	10	CellTiterBlue	AlamarBlue		64.491		7	10.1007/s00204-012-0840-4
228	2012	Ag	I	Sphere	CKK	Precipitation		40					Caco-2	10000	H	Human	Colon	Epithelial	Adult	L	24	25	CellTiterBlue	AlamarBlue		93.966		7	10.1007/s00204-012-0840-4
229	2012	Ag	I	Sphere	CKK	Precipitation		40					Caco-2	10000	H	Human	Colon	Epithelial	Adult	L	30	25	CellTiterBlue	AlamarBlue		80.91		7	10.1007/s00204-012-0840-4
230	2012	Ag	I	Sphere	CKK	Precipitation		40					Caco-2	10000	H	Human	Colon	Epithelial	Adult	L	48	25	CellTiterBlue	AlamarBlue		43.323		7	10.1007/s00204-012-0840-4
231	2012	Ag	I	Sphere	CKK	Precipitation		40					Caco-2	10000	H	Human	Colon	Epithelial	Adult	L	24	50	CellTiterBlue	AlamarBlue		72.601		7	10.1007/s00204-012-0840-4
232	2012	Ag	I	Sphere	CKK	Precipitation		40					Caco-2	10000	H	Human	Colon	Epithelial	Adult	L	30	50	CellTiterBlue	AlamarBlue		54.797		7	10.1007/s00204-012-0840-4
233	2012	Ag	I	Sphere	CKK	Precipitation		40					Caco-2	10000	H	Human	Colon	Epithelial	Adult	L	48	50	CellTiterBlue	AlamarBlue		26.706		7	10.1007/s00204-012-0840-4
234	2012	Ag	I	Sphere	CKK	Precipitation		40					Caco-2	10000	H	Human	Colon	Epithelial	Adult	L	24	100	CellTiterBlue	AlamarBlue		43.323		7	10.1007/s00204-012-0840-4
235	2012	Ag	I	Sphere	CKK	Precipitation		40					Caco-2	10000	H	Human	Colon	Epithelial	Adult	L	30	100	CellTiterBlue	AlamarBlue		26.706		7	10.1007/s00204-012-0840-4
236	2012	Ag	I	Sphere	CKK	Precipitation		40					Caco-2	10000	H	Human	Colon	Epithelial	Adult	L	48	100	CellTiterBlue	AlamarBlue		5.9347		7	10.1007/s00204-012-0840-4
237	2014	IronOxide	I	Sphere	None	Precipitation		22	174				A549	10000	H	Human	Lung	Epithelial	Adult	L	24	10	MTT	TetrazoliumSalt		84		8	10.1016/j.colsurfb.2014.06.064
238	2014	IronOxide	I	Sphere	None	Precipitation		22	174				A549	10000	H	Human	Lung	Epithelial	Adult	L	24	25	MTT	TetrazoliumSalt		72		8	10.1016/j.colsurfb.2014.06.064
239	2014	IronOxide	I	Sphere	None	Precipitation		22	174				A549	10000	H	Human	Lung	Epithelial	Adult	L	24	50	MTT	TetrazoliumSalt		56		8	10.1016/j.colsurfb.2014.06.064
240	2014	IronOxide	I	Sphere	None	Precipitation		22	174				A549	10000	H	Human	Lung	Epithelial	Adult	L	24	10	NRU	NeutralRed		87		8	10.1016/j.colsurfb.2014.06.064
241	2014	IronOxide	I	Sphere	None	Precipitation		22	174				A549	10000	H	Human	Lung	Epithelial	Adult	L	24	25	NRU	NeutralRed		79		8	10.1016/j.colsurfb.2014.06.064
242	2014	IronOxide	I	Sphere	None	Precipitation		22	174				A549	10000	H	Human	Lung	Epithelial	Adult	L	24	50	NRU	NeutralRed		65		8	10.1016/j.colsurfb.2014.06.064
243	2014	Ag	I	Sphere	None	Chemical Reduction	Negative	17	36.4		-23.1		KEC	20000	H	Human	Skin	Epithelial	Adult	P	24	1.35	MTS	TetrazoliumSalt		84.91		9	10.1007/s11051-014-2726-2
244	2014	Ag	I	Sphere	None	Chemical Reduction	Negative	17	36.4		-23.1		KEC	20000	H	Human	Skin	Epithelial	Adult	P	24	2.7	MTS	TetrazoliumSalt		82.481		9	10.1007/s11051-014-2726-2
245	2014	Ag	I	Sphere	None	Chemical Reduction	Negative	17	36.4		-23.1		KEC	20000	H	Human	Skin	Epithelial	Adult	P	24	5.39	MTS	TetrazoliumSalt		77.621		9	10.1007/s11051-014-2726-2
246	2014	Ag	I	Sphere	None	Chemical Reduction	Negative	17	36.4		-23.1		KEC	20000	H	Human	Skin	Epithelial	Adult	P	24	13.48	MTS	TetrazoliumSalt		27.621		9	10.1007/s11051-014-2726-2
247	2014	Ag	I	Sphere	None	Chemical Reduction	Negative	17	36.4		-23.1		KEC	20000	H	Human	Skin	Epithelial	Adult	P	48	1.35	MTS	TetrazoliumSalt		86.189		9	10.1007/s11051-014-2726-2
248	2014	Ag	I	Sphere	None	Chemical Reduction	Negative	17	36.4		-23.1		KEC	20000	H	Human	Skin	Epithelial	Adult	P	48	2.7	MTS	TetrazoliumSalt		85.55		9	10.1007/s11051-014-2726-2
249	2014	Ag	I	Sphere	None	Chemical Reduction	Negative	17	36.4		-23.1		KEC	20000	H	Human	Skin	Epithelial	Adult	P	48	5.39	MTS	TetrazoliumSalt		84.655		9	10.1007/s11051-014-2726-2
250	2014	Ag	I	Sphere	None	Chemical Reduction	Negative	17	36.4		-23.1		KEC	20000	H	Human	Skin	Epithelial	Adult	P	48	13.48	MTS	TetrazoliumSalt		8.0563		9	10.1007/s11051-014-2726-2
251	2014	Ag	I	Sphere	PVP	Chemical Reduction	Negative	17	27.02		-18.4		KEC	20000	H	Human	Skin	Epithelial	Adult	P	24	1.35	MTS	TetrazoliumSalt		102.89		9	10.1007/s11051-014-2726-2
252	2014	Ag	I	Sphere	PVP	Chemical Reduction	Negative	17	27.02		-18.4		KEC	20000	H	Human	Skin	Epithelial	Adult	P	24	2.7	MTS	TetrazoliumSalt		95.921		9	10.1007/s11051-014-2726-2
253	2014	Ag	I	Sphere	PVP	Chemical Reduction	Negative	17	27.02		-18.4		KEC	20000	H	Human	Skin	Epithelial	Adult	P	24	5.39	MTS	TetrazoliumSalt		75.395		9	10.1007/s11051-014-2726-2
254	2014	Ag	I	Sphere	PVP	Chemical Reduction	Negative	17	27.02		-18.4		KEC	20000	H	Human	Skin	Epithelial	Adult	P	24	13.48	MTS	TetrazoliumSalt		17.895		9	10.1007/s11051-014-2726-2
255	2014	Ag	I	Sphere	PVP	Chemical Reduction	Negative	17	27.02		-18.4		KEC	20000	H	Human	Skin	Epithelial	Adult	P	48	1.35	MTS	TetrazoliumSalt		102.89		9	10.1007/s11051-014-2726-2
256	2014	Ag	I	Sphere	PVP	Chemical Reduction	Negative	17	27.02		-18.4		KEC	20000	H	Human	Skin	Epithelial	Adult	P	48	2.7	MTS	TetrazoliumSalt		77.632		9	10.1007/s11051-014-2726-2
257	2014	Ag	I	Sphere	PVP	Chemical Reduction	Negative	17	27.02		-18.4		KEC	20000	H	Human	Skin	Epithelial	Adult	P	48	5.39	MTS	TetrazoliumSalt		32.763		9	10.1007/s11051-014-2726-2
258	2014	Ag	I	Sphere	PVP	Chemical Reduction	Negative	17	27.02		-18.4		KEC	20000	H	Human	Skin	Epithelial	Adult	P	48	13.48	MTS	TetrazoliumSalt		5.3947		9	10.1007/s11051-014-2726-2
259	2011	TiO2	I	Irregular	None	Commercial	Negative	50	124.9	171.4	-17.6	-11.5	A431	10000	H	Human	Skin	Epithelial	Adult	L	6	0.008	MTT	TetrazoliumSalt		99.883		10	10.1016/j.tiv.2010.11.008
260	2011	TiO2	I	Irregular	None	Commercial	Negative	50	124.9	171.4	-17.6	-11.5	A431	10000	H	Human	Skin	Epithelial	Adult	L	6	0.08	MTT	TetrazoliumSalt		98.659		10	10.1016/j.tiv.2010.11.008
261	2011	TiO2	I	Irregular	None	Commercial	Negative	50	124.9	171.4	-17.6	-11.5	A431	10000	H	Human	Skin	Epithelial	Adult	L	6	0.8	MTT	TetrazoliumSalt		96.91		10	10.1016/j.tiv.2010.11.008
262	2011	TiO2	I	Irregular	None	Commercial	Negative	50	124.9	171.4	-17.6	-11.5	A431	10000	H	Human	Skin	Epithelial	Adult	L	6	8	MTT	TetrazoliumSalt		95.335		10	10.1016/j.tiv.2010.11.008
263	2011	TiO2	I	Irregular	None	Commercial	Negative	50	124.9	171.4	-17.6	-11.5	A431	10000	H	Human	Skin	Epithelial	Adult	L	6	80	MTT	TetrazoliumSalt		93.061		10	10.1016/j.tiv.2010.11.008
264	2011	TiO2	I	Irregular	None	Commercial	Negative	50	124.9	171.4	-17.6	-11.5	A431	10000	H	Human	Skin	Epithelial	Adult	L	24	0.008	MTT	TetrazoliumSalt		98.659		10	10.1016/j.tiv.2010.11.008
265	2011	TiO2	I	Irregular	None	Commercial	Negative	50	124.9	171.4	-17.6	-11.5	A431	10000	H	Human	Skin	Epithelial	Adult	L	24	0.08	MTT	TetrazoliumSalt		99.883		10	10.1016/j.tiv.2010.11.008
266	2011	TiO2	I	Irregular	None	Commercial	Negative	50	124.9	171.4	-17.6	-11.5	A431	10000	H	Human	Skin	Epithelial	Adult	L	24	0.8	MTT	TetrazoliumSalt		88.338		10	10.1016/j.tiv.2010.11.008
267	2011	TiO2	I	Irregular	None	Commercial	Negative	50	124.9	171.4	-17.6	-11.5	A431	10000	H	Human	Skin	Epithelial	Adult	L	24	8	MTT	TetrazoliumSalt		83.44		10	10.1016/j.tiv.2010.11.008
268	2011	TiO2	I	Irregular	None	Commercial	Negative	50	124.9	171.4	-17.6	-11.5	A431	10000	H	Human	Skin	Epithelial	Adult	L	24	80	MTT	TetrazoliumSalt		80.466		10	10.1016/j.tiv.2010.11.008
269	2011	TiO2	I	Irregular	None	Commercial	Negative	50	124.9	171.4	-17.6	-11.5	A431	10000	H	Human	Skin	Epithelial	Adult	L	48	0.008	MTT	TetrazoliumSalt		97.609		10	10.1016/j.tiv.2010.11.008
270	2011	TiO2	I	Irregular	None	Commercial	Negative	50	124.9	171.4	-17.6	-11.5	A431	10000	H	Human	Skin	Epithelial	Adult	L	48	0.08	MTT	TetrazoliumSalt		96.385		10	10.1016/j.tiv.2010.11.008
271	2011	TiO2	I	Irregular	None	Commercial	Negative	50	124.9	171.4	-17.6	-11.5	A431	10000	H	Human	Skin	Epithelial	Adult	L	48	0.8	MTT	TetrazoliumSalt		85.015		10	10.1016/j.tiv.2010.11.008
272	2011	TiO2	I	Irregular	None	Commercial	Negative	50	124.9	171.4	-17.6	-11.5	A431	10000	H	Human	Skin	Epithelial	Adult	L	48	8	MTT	TetrazoliumSalt		74.169		10	10.1016/j.tiv.2010.11.008
273	2011	TiO2	I	Irregular	None	Commercial	Negative	50	124.9	171.4	-17.6	-11.5	A431	10000	H	Human	Skin	Epithelial	Adult	L	48	80	MTT	TetrazoliumSalt		68.222		10	10.1016/j.tiv.2010.11.008
274	2011	TiO2	I	Irregular	None	Commercial	Negative	50	124.9	171.4	-17.6	-11.5	A431	10000	H	Human	Skin	Epithelial	Adult	L	6	0.008	NRU	NeutralRed		98.754		10	10.1016/j.tiv.2010.11.008
275	2011	TiO2	I	Irregular	None	Commercial	Negative	50	124.9	171.4	-17.6	-11.5	A431	10000	H	Human	Skin	Epithelial	Adult	L	6	0.08	NRU	NeutralRed		99.344		10	10.1016/j.tiv.2010.11.008
276	2011	TiO2	I	Irregular	None	Commercial	Negative	50	124.9	171.4	-17.6	-11.5	A431	10000	H	Human	Skin	Epithelial	Adult	L	6	0.8	NRU	NeutralRed		92.262		10	10.1016/j.tiv.2010.11.008
277	2011	TiO2	I	Irregular	None	Commercial	Negative	50	124.9	171.4	-17.6	-11.5	A431	10000	H	Human	Skin	Epithelial	Adult	L	6	8	NRU	NeutralRed		91.672		10	10.1016/j.tiv.2010.11.008
278	2011	TiO2	I	Irregular	None	Commercial	Negative	50	124.9	171.4	-17.6	-11.5	A431	10000	H	Human	Skin	Epithelial	Adult	L	6	80	NRU	NeutralRed		90.295		10	10.1016/j.tiv.2010.11.008
279	2011	TiO2	I	Irregular	None	Commercial	Negative	50	124.9	171.4	-17.6	-11.5	A431	10000	H	Human	Skin	Epithelial	Adult	L	24	0.008	NRU	NeutralRed		97.574		10	10.1016/j.tiv.2010.11.008
280	2011	TiO2	I	Irregular	None	Commercial	Negative	50	124.9	171.4	-17.6	-11.5	A431	10000	H	Human	Skin	Epithelial	Adult	L	24	0.08	NRU	NeutralRed		93.836		10	10.1016/j.tiv.2010.11.008
281	2011	TiO2	I	Irregular	None	Commercial	Negative	50	124.9	171.4	-17.6	-11.5	A431	10000	H	Human	Skin	Epithelial	Adult	L	24	0.8	NRU	NeutralRed		88.328		10	10.1016/j.tiv.2010.11.008
282	2011	TiO2	I	Irregular	None	Commercial	Negative	50	124.9	171.4	-17.6	-11.5	A431	10000	H	Human	Skin	Epithelial	Adult	L	24	8	NRU	NeutralRed		85.377		10	10.1016/j.tiv.2010.11.008
283	2011	TiO2	I	Irregular	None	Commercial	Negative	50	124.9	171.4	-17.6	-11.5	A431	10000	H	Human	Skin	Epithelial	Adult	L	24	80	NRU	NeutralRed		77.508		10	10.1016/j.tiv.2010.11.008
284	2011	TiO2	I	Irregular	None	Commercial	Negative	50	124.9	171.4	-17.6	-11.5	A431	10000	H	Human	Skin	Epithelial	Adult	L	48	0.008	NRU	NeutralRed		97.574		10	10.1016/j.tiv.2010.11.008
285	2011	TiO2	I	Irregular	None	Commercial	Negative	50	124.9	171.4	-17.6	-11.5	A431	10000	H	Human	Skin	Epithelial	Adult	L	48	0.08	NRU	NeutralRed		93.049		10	10.1016/j.tiv.2010.11.008
286	2011	TiO2	I	Irregular	None	Commercial	Negative	50	124.9	171.4	-17.6	-11.5	A431	10000	H	Human	Skin	Epithelial	Adult	L	48	0.8	NRU	NeutralRed		85.77		10	10.1016/j.tiv.2010.11.008
287	2011	TiO2	I	Irregular	None	Commercial	Negative	50	124.9	171.4	-17.6	-11.5	A431	10000	H	Human	Skin	Epithelial	Adult	L	48	8	NRU	NeutralRed		74.951		10	10.1016/j.tiv.2010.11.008
288	2011	TiO2	I	Irregular	None	Commercial	Negative	50	124.9	171.4	-17.6	-11.5	A431	10000	H	Human	Skin	Epithelial	Adult	L	48	80	NRU	NeutralRed		65.311		10	10.1016/j.tiv.2010.11.008
289	2014	Au	I	Sphere	PEG	Chemical Reduction	Negative	4.6	21.7		-7.6		PC12	50000	A	Rat	Adrenal Gland	Irregular	Adult	L	24		MTT	TetrazoliumSalt		96.951		11	10.1002/ppsc.201300357
290	2014	Au	I	Sphere	PEG	Chemical Reduction	Negative	4.6	21.7		-7.6		PC12	50000	A	Rat	Adrenal Gland	Irregular	Adult	L	24		MTT	TetrazoliumSalt		95.654		11	10.1002/ppsc.201300357
291	2014	Au	I	Sphere	PEG	Chemical Reduction	Negative	4.6	21.7		-7.6		PC12	50000	A	Rat	Adrenal Gland	Irregular	Adult	L	24		MTT	TetrazoliumSalt		94.214		11	10.1002/ppsc.201300357
292	2014	Au	I	Sphere	PEG	Chemical Reduction	Negative	4.6	21.7		-7.6		PC12	50000	A	Rat	Adrenal Gland	Irregular	Adult	L	24		MTT	TetrazoliumSalt		92.053		11	10.1002/ppsc.201300357
293	2014	Au	I	Sphere	PEG	Chemical Reduction	Negative	4.6	21.7		-7.6		PC12	50000	A	Rat	Adrenal Gland	Irregular	Adult	L	24		MTT	TetrazoliumSalt		94.934		11	10.1002/ppsc.201300357
294	2014	Au	I	Sphere	PEG	Chemical Reduction	Negative	4.6	21.7		-7.6		PC12	50000	A	Rat	Adrenal Gland	Irregular	Adult	L	24		MTT	TetrazoliumSalt		84.706		11	10.1002/ppsc.201300357
295	2014	Au	I	Sphere	PEG	Chemical Reduction	Negative	4.6	21.7		-7.6		PC12	50000	A	Rat	Adrenal Gland	Irregular	Adult	L	24		MTT	TetrazoliumSalt		77.647		11	10.1002/ppsc.201300357
296	2014	Au	I	Sphere	PEG	Chemical Reduction	Negative	4.6	21.7		-7.6		HUVEC	50000	H	Human	Umbilical Vein	Endothelial	Embryonic	P	24		MTT	TetrazoliumSalt		94.934		11	10.1002/ppsc.201300357
297	2014	Au	I	Sphere	PEG	Chemical Reduction	Negative	4.6	21.7		-7.6		HUVEC	50000	H	Human	Umbilical Vein	Endothelial	Embryonic	P	24		MTT	TetrazoliumSalt		96.807		11	10.1002/ppsc.201300357
298	2014	Au	I	Sphere	PEG	Chemical Reduction	Negative	4.6	21.7		-7.6		HUVEC	50000	H	Human	Umbilical Vein	Endothelial	Embryonic	P	24		MTT	TetrazoliumSalt		94.646		11	10.1002/ppsc.201300357
299	2014	Au	I	Sphere	PEG	Chemical Reduction	Negative	4.6	21.7		-7.6		HUVEC	50000	H	Human	Umbilical Vein	Endothelial	Embryonic	P	24		MTT	TetrazoliumSalt		91.909		11	10.1002/ppsc.201300357
300	2014	Au	I	Sphere	PEG	Chemical Reduction	Negative	4.6	21.7		-7.6		HUVEC	50000	H	Human	Umbilical Vein	Endothelial	Embryonic	P	24		MTT	TetrazoliumSalt		86.002		11	10.1002/ppsc.201300357
301	2014	Au	I	Sphere	PEG	Chemical Reduction	Negative	4.6	21.7		-7.6		HUVEC	50000	H	Human	Umbilical Vein	Endothelial	Embryonic	P	24		MTT	TetrazoliumSalt		72.029		11	10.1002/ppsc.201300357
302	2014	Au	I	Sphere	PEG	Chemical Reduction	Negative	4.6	21.7		-7.6		HUVEC	50000	H	Human	Umbilical Vein	Endothelial	Embryonic	P	24		MTT	TetrazoliumSalt		53.733		11	10.1002/ppsc.201300357
303	2014	Au	I	Sphere	PEG	Chemical Reduction	Negative	4.6	21.7		-7.6		C17.2	50000	A	Mouse	Cerebellum	Neuronal	Adult	L	24		MTT	TetrazoliumSalt		91.477		11	10.1002/ppsc.201300357
304	2014	Au	I	Sphere	PEG	Chemical Reduction	Negative	4.6	21.7		-7.6		C17.2	50000	A	Mouse	Cerebellum	Neuronal	Adult	L	24		MTT	TetrazoliumSalt		93.637		11	10.1002/ppsc.201300357
305	2014	Au	I	Sphere	PEG	Chemical Reduction	Negative	4.6	21.7		-7.6		C17.2	50000	A	Mouse	Cerebellum	Neuronal	Adult	L	24		MTT	TetrazoliumSalt		95.51		11	10.1002/ppsc.201300357
306	2014	Au	I	Sphere	PEG	Chemical Reduction	Negative	4.6	21.7		-7.6		C17.2	50000	A	Mouse	Cerebellum	Neuronal	Adult	L	24		MTT	TetrazoliumSalt		92.341		11	10.1002/ppsc.201300357
307	2014	Au	I	Sphere	PEG	Chemical Reduction	Negative	4.6	21.7		-7.6		C17.2	50000	A	Mouse	Cerebellum	Neuronal	Adult	L	24		MTT	TetrazoliumSalt		88.739		11	10.1002/ppsc.201300357
308	2014	Au	I	Sphere	PEG	Chemical Reduction	Negative	4.6	21.7		-7.6		C17.2	50000	A	Mouse	Cerebellum	Neuronal	Adult	L	24		MTT	TetrazoliumSalt		82.545		11	10.1002/ppsc.201300357
309	2014	Au	I	Sphere	PEG	Chemical Reduction	Negative	4.6	21.7		-7.6		C17.2	50000	A	Mouse	Cerebellum	Neuronal	Adult	L	24		MTT	TetrazoliumSalt		71.597		11	10.1002/ppsc.201300357
310	2010	Dendrimer	O	Sphere	None	Commercial	Positive			1.9	16		HeLa		H	Human	Cervix	Epithelial	Adult	L	1	0.3	Live/Dead	PropidiumIodide		98		12	10.1021/mp9002464
311	2010	Dendrimer	O	Sphere	None	Commercial	Positive			1.9	16		HeLa		H	Human	Cervix	Epithelial	Adult	L	1	1.7	Live/Dead	PropidiumIodide		97.3		12	10.1021/mp9002464
312	2010	Dendrimer	O	Sphere	None	Commercial	Positive			1.9	16		HeLa		H	Human	Cervix	Epithelial	Adult	L	1	5	Live/Dead	PropidiumIodide		97.2		12	10.1021/mp9002464
313	2010	Dendrimer	O	Sphere	None	Commercial	Positive			2.5	64		HeLa		H	Human	Cervix	Epithelial	Adult	L	1	1.4	Live/Dead	PropidiumIodide		98		12	10.1021/mp9002464
314	2010	Dendrimer	O	Sphere	None	Commercial	Positive			2.5	64		HeLa		H	Human	Cervix	Epithelial	Adult	L	1	7.1	Live/Dead	PropidiumIodide		97.2		12	10.1021/mp9002464
315	2010	Dendrimer	O	Sphere	None	Commercial	Positive			2.5	64		HeLa		H	Human	Cervix	Epithelial	Adult	L	1	21.3	Live/Dead	PropidiumIodide		95.7		12	10.1021/mp9002464
316	2010	Dendrimer	O	Sphere	None	Commercial	Positive			3.8	256		HeLa		H	Human	Cervix	Epithelial	Adult	L	1	5.8	Live/Dead	PropidiumIodide		97.6		12	10.1021/mp9002464
317	2010	Dendrimer	O	Sphere	None	Commercial	Positive			3.8	256		HeLa		H	Human	Cervix	Epithelial	Adult	L	1	29	Live/Dead	PropidiumIodide		88.4		12	10.1021/mp9002464
318	2010	Dendrimer	O	Sphere	None	Commercial	Positive			3.8	256		HeLa		H	Human	Cervix	Epithelial	Adult	L	1	87	Live/Dead	PropidiumIodide		67		12	10.1021/mp9002464
319	2010	Dendrimer	O	Sphere	Ac	Commercial	Positive			4	150		HeLa		H	Human	Cervix	Epithelial	Adult	L	1	6.1	Live/Dead	PropidiumIodide		97.8		12	10.1021/mp9002464
320	2010	Dendrimer	O	Sphere	Ac	Commercial	Positive			4	150		HeLa		H	Human	Cervix	Epithelial	Adult	L	1	3.01	Live/Dead	PropidiumIodide		95.5		12	10.1021/mp9002464
321	2010	Dendrimer	O	Sphere	Ac	Commercial	Positive			4	150		HeLa		H	Human	Cervix	Epithelial	Adult	L	1	92	Live/Dead	PropidiumIodide		94.2		12	10.1021/mp9002464
322	2010	Dendrimer	O	Sphere	C12	Commercial	Neutral			2.5			HeLa		H	Human	Cervix	Epithelial	Adult	L	1	2	Live/Dead	PropidiumIodide		97		12	10.1021/mp9002464
323	2010	Dendrimer	O	Sphere	C12	Commercial	Neutral			2.5			HeLa		H	Human	Cervix	Epithelial	Adult	L	1	10.1	Live/Dead	PropidiumIodide		90.1		12	10.1021/mp9002464
324	2010	Dendrimer	O	Sphere	C12	Commercial	Neutral			2.5			HeLa		H	Human	Cervix	Epithelial	Adult	L	1	30.2	Live/Dead	PropidiumIodide		86.9		12	10.1021/mp9002464
325	2010	Dendrimer	O	Sphere	Ac	Commercial	Neutral			2.9			HeLa		H	Human	Cervix	Epithelial	Adult	L	1	1.7	Live/Dead	PropidiumIodide		99		12	10.1021/mp9002464
326	2010	Dendrimer	O	Sphere	Ac	Commercial	Neutral			2.9			HeLa		H	Human	Cervix	Epithelial	Adult	L	1	8.5	Live/Dead	PropidiumIodide		97.2		12	10.1021/mp9002464
327	2010	Dendrimer	O	Sphere	Ac	Commercial	Neutral			2.9			HeLa		H	Human	Cervix	Epithelial	Adult	L	1	25.3	Live/Dead	PropidiumIodide		97		12	10.1021/mp9002464
328	2012	Dendrimer	O	Sphere	None	Commercial	Positive		3.9		9		Neuron		A	Mouse	Cortex	Neuronal	Adult	P	24		Live/Dead	PropidiumIodide		100		13	10.1021/mp300391v
329	2012	Dendrimer	O	Sphere	None	Commercial	Positive		3.9		9		Neuron		A	Mouse	Cortex	Neuronal	Adult	P	24		Live/Dead	PropidiumIodide		86.29		13	10.1021/mp300391v
330	2012	Dendrimer	O	Sphere	None	Commercial	Positive		3.9		9		Neuron		A	Mouse	Cortex	Neuronal	Adult	P	24		Live/Dead	PropidiumIodide		73.226		13	10.1021/mp300391v
331	2012	Dendrimer	O	Sphere	C12	Commercial	Positive		4		5.8		Neuron		A	Mouse	Cortex	Neuronal	Adult	P	24		Live/Dead	PropidiumIodide		96.774		13	10.1021/mp300391v
332	2012	Dendrimer	O	Sphere	C12	Commercial	Positive		4		5.8		Neuron		A	Mouse	Cortex	Neuronal	Adult	P	24		Live/Dead	PropidiumIodide		90.645		13	10.1021/mp300391v
333	2012	Dendrimer	O	Sphere	C12	Commercial	Positive		4		5.8		Neuron		A	Mouse	Cortex	Neuronal	Adult	P	24		Live/Dead	PropidiumIodide		37.419		13	10.1021/mp300391v
334	2016	Dendrimer	O	Sphere	None	Commercial	Positive						HaCat	10000	H	Human	Skin	Keratinocyte	Adult	L	6	2.27424	AlamarBlue	AlamarBlue		97.012		14	10.1007/s00216-016-9623-8
335	2016	Dendrimer	O	Sphere	None	Commercial	Positive						HaCat	10000	H	Human	Skin	Keratinocyte	Adult	L	6	4.54848	AlamarBlue	AlamarBlue		96.084		14	10.1007/s00216-016-9623-8
336	2016	Dendrimer	O	Sphere	None	Commercial	Positive						HaCat	10000	H	Human	Skin	Keratinocyte	Adult	L	6	9.2391	AlamarBlue	AlamarBlue		95.024		14	10.1007/s00216-016-9623-8
337	2016	Dendrimer	O	Sphere	None	Commercial	Positive						HaCat	10000	H	Human	Skin	Keratinocyte	Adult	L	6	18.4782	AlamarBlue	AlamarBlue		93.169		14	10.1007/s00216-016-9623-8
338	2016	Dendrimer	O	Sphere	None	Commercial	Positive						HaCat	10000	H	Human	Skin	Keratinocyte	Adult	L	6	36.9564	AlamarBlue	AlamarBlue		94.229		14	10.1007/s00216-016-9623-8
339	2016	Dendrimer	O	Sphere	None	Commercial	Positive						HaCat	10000	H	Human	Skin	Keratinocyte	Adult	L	6	73.9128	AlamarBlue	AlamarBlue		92.904		14	10.1007/s00216-016-9623-8
340	2016	Dendrimer	O	Sphere	None	Commercial	Positive						HaCat	10000	H	Human	Skin	Keratinocyte	Adult	L	6	110.869	AlamarBlue	AlamarBlue		93.699		14	10.1007/s00216-016-9623-8
341	2016	Dendrimer	O	Sphere	None	Commercial	Positive						HaCat	10000	H	Human	Skin	Keratinocyte	Adult	L	6	147.826	AlamarBlue	AlamarBlue		96.482		14	10.1007/s00216-016-9623-8
342	2016	Dendrimer	O	Sphere	None	Commercial	Positive						HaCat	10000	H	Human	Skin	Keratinocyte	Adult	L	12	2.27424	AlamarBlue	AlamarBlue		91.976		14	10.1007/s00216-016-9623-8
343	2016	Dendrimer	O	Sphere	None	Commercial	Positive						HaCat	10000	H	Human	Skin	Keratinocyte	Adult	L	12	4.54848	AlamarBlue	AlamarBlue		91.711		14	10.1007/s00216-016-9623-8
344	2016	Dendrimer	O	Sphere	None	Commercial	Positive						HaCat	10000	H	Human	Skin	Keratinocyte	Adult	L	12	9.2391	AlamarBlue	AlamarBlue		89.855		14	10.1007/s00216-016-9623-8
345	2016	Dendrimer	O	Sphere	None	Commercial	Positive						HaCat	10000	H	Human	Skin	Keratinocyte	Adult	L	12	18.4782	AlamarBlue	AlamarBlue		87.735		14	10.1007/s00216-016-9623-8
346	2016	Dendrimer	O	Sphere	None	Commercial	Positive						HaCat	10000	H	Human	Skin	Keratinocyte	Adult	L	12	36.9564	AlamarBlue	AlamarBlue		86.41		14	10.1007/s00216-016-9623-8
347	2016	Dendrimer	O	Sphere	None	Commercial	Positive						HaCat	10000	H	Human	Skin	Keratinocyte	Adult	L	12	73.9128	AlamarBlue	AlamarBlue		84.952		14	10.1007/s00216-016-9623-8
348	2016	Dendrimer	O	Sphere	None	Commercial	Positive						HaCat	10000	H	Human	Skin	Keratinocyte	Adult	L	12	110.869	AlamarBlue	AlamarBlue		84.952		14	10.1007/s00216-016-9623-8
349	2016	Dendrimer	O	Sphere	None	Commercial	Positive						HaCat	10000	H	Human	Skin	Keratinocyte	Adult	L	12	147.826	AlamarBlue	AlamarBlue		90.916		14	10.1007/s00216-016-9623-8
350	2016	Dendrimer	O	Sphere	None	Commercial	Positive						HaCat	10000	H	Human	Skin	Keratinocyte	Adult	L	24	2.27424	AlamarBlue	AlamarBlue		94.759		14	10.1007/s00216-016-9623-8
351	2016	Dendrimer	O	Sphere	None	Commercial	Positive						HaCat	10000	H	Human	Skin	Keratinocyte	Adult	L	24	4.54848	AlamarBlue	AlamarBlue		92.904		14	10.1007/s00216-016-9623-8
352	2016	Dendrimer	O	Sphere	None	Commercial	Positive						HaCat	10000	H	Human	Skin	Keratinocyte	Adult	L	24	9.2391	AlamarBlue	AlamarBlue		91.048		14	10.1007/s00216-016-9623-8
353	2016	Dendrimer	O	Sphere	None	Commercial	Positive						HaCat	10000	H	Human	Skin	Keratinocyte	Adult	L	24	18.4782	AlamarBlue	AlamarBlue		89.325		14	10.1007/s00216-016-9623-8
354	2016	Dendrimer	O	Sphere	None	Commercial	Positive						HaCat	10000	H	Human	Skin	Keratinocyte	Adult	L	24	36.9564	AlamarBlue	AlamarBlue		87.072		14	10.1007/s00216-016-9623-8
355	2016	Dendrimer	O	Sphere	None	Commercial	Positive						HaCat	10000	H	Human	Skin	Keratinocyte	Adult	L	24	73.9128	AlamarBlue	AlamarBlue		87.735		14	10.1007/s00216-016-9623-8
356	2016	Dendrimer	O	Sphere	None	Commercial	Positive						HaCat	10000	H	Human	Skin	Keratinocyte	Adult	L	24	110.869	AlamarBlue	AlamarBlue		88.398		14	10.1007/s00216-016-9623-8
357	2016	Dendrimer	O	Sphere	None	Commercial	Positive						HaCat	10000	H	Human	Skin	Keratinocyte	Adult	L	24	147.826	AlamarBlue	AlamarBlue		89.325		14	10.1007/s00216-016-9623-8
358	2016	Dendrimer	O	Sphere	None	Commercial	Positive						HaCat	10000	H	Human	Skin	Keratinocyte	Adult	L	48	2.27424	AlamarBlue	AlamarBlue		96.084		14	10.1007/s00216-016-9623-8
359	2016	Dendrimer	O	Sphere	None	Commercial	Positive						HaCat	10000	H	Human	Skin	Keratinocyte	Adult	L	48	4.54848	AlamarBlue	AlamarBlue		93.434		14	10.1007/s00216-016-9623-8
360	2016	Dendrimer	O	Sphere	None	Commercial	Positive						HaCat	10000	H	Human	Skin	Keratinocyte	Adult	L	48	9.2391	AlamarBlue	AlamarBlue		91.181		14	10.1007/s00216-016-9623-8
361	2016	Dendrimer	O	Sphere	None	Commercial	Positive						HaCat	10000	H	Human	Skin	Keratinocyte	Adult	L	48	18.4782	AlamarBlue	AlamarBlue		88.928		14	10.1007/s00216-016-9623-8
362	2016	Dendrimer	O	Sphere	None	Commercial	Positive						HaCat	10000	H	Human	Skin	Keratinocyte	Adult	L	48	36.9564	AlamarBlue	AlamarBlue		81.108		14	10.1007/s00216-016-9623-8
363	2016	Dendrimer	O	Sphere	None	Commercial	Positive						HaCat	10000	H	Human	Skin	Keratinocyte	Adult	L	48	73.9128	AlamarBlue	AlamarBlue		73.157		14	10.1007/s00216-016-9623-8
364	2016	Dendrimer	O	Sphere	None	Commercial	Positive						HaCat	10000	H	Human	Skin	Keratinocyte	Adult	L	48	110.869	AlamarBlue	AlamarBlue		67.59		14	10.1007/s00216-016-9623-8
365	2016	Dendrimer	O	Sphere	None	Commercial	Positive						HaCat	10000	H	Human	Skin	Keratinocyte	Adult	L	48	147.826	AlamarBlue	AlamarBlue		55.265		14	10.1007/s00216-016-9623-8
366	2016	Dendrimer	O	Sphere	None	Commercial	Positive						HaCat	10000	H	Human	Skin	Keratinocyte	Adult	L	72	2.27424	AlamarBlue	AlamarBlue		100.86		14	10.1007/s00216-016-9623-8
367	2016	Dendrimer	O	Sphere	None	Commercial	Positive						HaCat	10000	H	Human	Skin	Keratinocyte	Adult	L	72	4.54848	AlamarBlue	AlamarBlue		101.52		14	10.1007/s00216-016-9623-8
368	2016	Dendrimer	O	Sphere	None	Commercial	Positive						HaCat	10000	H	Human	Skin	Keratinocyte	Adult	L	72	9.2391	AlamarBlue	AlamarBlue		99.265		14	10.1007/s00216-016-9623-8
369	2016	Dendrimer	O	Sphere	None	Commercial	Positive						HaCat	10000	H	Human	Skin	Keratinocyte	Adult	L	72	18.4782	AlamarBlue	AlamarBlue		99.265		14	10.1007/s00216-016-9623-8
370	2016	Dendrimer	O	Sphere	None	Commercial	Positive						HaCat	10000	H	Human	Skin	Keratinocyte	Adult	L	72	36.9564	AlamarBlue	AlamarBlue		97.542		14	10.1007/s00216-016-9623-8
371	2016	Dendrimer	O	Sphere	None	Commercial	Positive						HaCat	10000	H	Human	Skin	Keratinocyte	Adult	L	72	73.9128	AlamarBlue	AlamarBlue		58.976		14	10.1007/s00216-016-9623-8
372	2016	Dendrimer	O	Sphere	None	Commercial	Positive						HaCat	10000	H	Human	Skin	Keratinocyte	Adult	L	72	110.869	AlamarBlue	AlamarBlue		36.048		14	10.1007/s00216-016-9623-8
373	2016	Dendrimer	O	Sphere	None	Commercial	Positive						HaCat	10000	H	Human	Skin	Keratinocyte	Adult	L	72	147.826	AlamarBlue	AlamarBlue		30.084		14	10.1007/s00216-016-9623-8
374	2016	Dendrimer	O	Sphere	None	Commercial	Positive						HaCat	10000	H	Human	Skin	Keratinocyte	Adult	L	6	2.27424	MTT	TetrazoliumSalt		92.157		14	10.1007/s00216-016-9623-8
375	2016	Dendrimer	O	Sphere	None	Commercial	Positive						HaCat	10000	H	Human	Skin	Keratinocyte	Adult	L	6	4.54848	MTT	TetrazoliumSalt		88.235		14	10.1007/s00216-016-9623-8
376	2016	Dendrimer	O	Sphere	None	Commercial	Positive						HaCat	10000	H	Human	Skin	Keratinocyte	Adult	L	6	9.2391	MTT	TetrazoliumSalt		88.235		14	10.1007/s00216-016-9623-8
377	2016	Dendrimer	O	Sphere	None	Commercial	Positive						HaCat	10000	H	Human	Skin	Keratinocyte	Adult	L	6	18.4782	MTT	TetrazoliumSalt		81.232		14	10.1007/s00216-016-9623-8
378	2016	Dendrimer	O	Sphere	None	Commercial	Positive						HaCat	10000	H	Human	Skin	Keratinocyte	Adult	L	6	36.9564	MTT	TetrazoliumSalt		80.112		14	10.1007/s00216-016-9623-8
379	2016	Dendrimer	O	Sphere	None	Commercial	Positive						HaCat	10000	H	Human	Skin	Keratinocyte	Adult	L	6	73.9128	MTT	TetrazoliumSalt		75.91		14	10.1007/s00216-016-9623-8
380	2016	Dendrimer	O	Sphere	None	Commercial	Positive						HaCat	10000	H	Human	Skin	Keratinocyte	Adult	L	6	110.869	MTT	TetrazoliumSalt		76.19		14	10.1007/s00216-016-9623-8
381	2016	Dendrimer	O	Sphere	None	Commercial	Positive						HaCat	10000	H	Human	Skin	Keratinocyte	Adult	L	6	147.826	MTT	TetrazoliumSalt		76.19		14	10.1007/s00216-016-9623-8
382	2016	Dendrimer	O	Sphere	None	Commercial	Positive						HaCat	10000	H	Human	Skin	Keratinocyte	Adult	L	12	2.27424	MTT	TetrazoliumSalt		97.199		14	10.1007/s00216-016-9623-8
383	2016	Dendrimer	O	Sphere	None	Commercial	Positive						HaCat	10000	H	Human	Skin	Keratinocyte	Adult	L	12	4.54848	MTT	TetrazoliumSalt		94.398		14	10.1007/s00216-016-9623-8
384	2016	Dendrimer	O	Sphere	None	Commercial	Positive						HaCat	10000	H	Human	Skin	Keratinocyte	Adult	L	12	9.2391	MTT	TetrazoliumSalt		96.359		14	10.1007/s00216-016-9623-8
385	2016	Dendrimer	O	Sphere	None	Commercial	Positive						HaCat	10000	H	Human	Skin	Keratinocyte	Adult	L	12	18.4782	MTT	TetrazoliumSalt		93.277		14	10.1007/s00216-016-9623-8
386	2016	Dendrimer	O	Sphere	None	Commercial	Positive						HaCat	10000	H	Human	Skin	Keratinocyte	Adult	L	12	36.9564	MTT	TetrazoliumSalt		88.235		14	10.1007/s00216-016-9623-8
387	2016	Dendrimer	O	Sphere	None	Commercial	Positive						HaCat	10000	H	Human	Skin	Keratinocyte	Adult	L	12	73.9128	MTT	TetrazoliumSalt		78.151		14	10.1007/s00216-016-9623-8
388	2016	Dendrimer	O	Sphere	None	Commercial	Positive						HaCat	10000	H	Human	Skin	Keratinocyte	Adult	L	12	110.869	MTT	TetrazoliumSalt		77.031		14	10.1007/s00216-016-9623-8
389	2016	Dendrimer	O	Sphere	None	Commercial	Positive						HaCat	10000	H	Human	Skin	Keratinocyte	Adult	L	12	147.826	MTT	TetrazoliumSalt		68.347		14	10.1007/s00216-016-9623-8
390	2016	Dendrimer	O	Sphere	None	Commercial	Positive						HaCat	10000	H	Human	Skin	Keratinocyte	Adult	L	24	2.27424	MTT	TetrazoliumSalt		102.52		14	10.1007/s00216-016-9623-8
391	2016	Dendrimer	O	Sphere	None	Commercial	Positive						HaCat	10000	H	Human	Skin	Keratinocyte	Adult	L	24	4.54848	MTT	TetrazoliumSalt		99.44		14	10.1007/s00216-016-9623-8
392	2016	Dendrimer	O	Sphere	None	Commercial	Positive						HaCat	10000	H	Human	Skin	Keratinocyte	Adult	L	24	9.2391	MTT	TetrazoliumSalt		105.32		14	10.1007/s00216-016-9623-8
393	2016	Dendrimer	O	Sphere	None	Commercial	Positive						HaCat	10000	H	Human	Skin	Keratinocyte	Adult	L	24	18.4782	MTT	TetrazoliumSalt		106.72		14	10.1007/s00216-016-9623-8
394	2016	Dendrimer	O	Sphere	None	Commercial	Positive						HaCat	10000	H	Human	Skin	Keratinocyte	Adult	L	24	36.9564	MTT	TetrazoliumSalt		103.36		14	10.1007/s00216-016-9623-8
395	2016	Dendrimer	O	Sphere	None	Commercial	Positive						HaCat	10000	H	Human	Skin	Keratinocyte	Adult	L	24	73.9128	MTT	TetrazoliumSalt		86.555		14	10.1007/s00216-016-9623-8
396	2016	Dendrimer	O	Sphere	None	Commercial	Positive						HaCat	10000	H	Human	Skin	Keratinocyte	Adult	L	24	110.869	MTT	TetrazoliumSalt		74.51		14	10.1007/s00216-016-9623-8
397	2016	Dendrimer	O	Sphere	None	Commercial	Positive						HaCat	10000	H	Human	Skin	Keratinocyte	Adult	L	24	147.826	MTT	TetrazoliumSalt		43.697		14	10.1007/s00216-016-9623-8
398	2016	Dendrimer	O	Sphere	None	Commercial	Positive						HaCat	10000	H	Human	Skin	Keratinocyte	Adult	L	48	2.27424	MTT	TetrazoliumSalt		112.89		14	10.1007/s00216-016-9623-8
399	2016	Dendrimer	O	Sphere	None	Commercial	Positive						HaCat	10000	H	Human	Skin	Keratinocyte	Adult	L	48	4.54848	MTT	TetrazoliumSalt		149.3		14	10.1007/s00216-016-9623-8
400	2016	Dendrimer	O	Sphere	None	Commercial	Positive						HaCat	10000	H	Human	Skin	Keratinocyte	Adult	L	48	9.2391	MTT	TetrazoliumSalt		173.95		14	10.1007/s00216-016-9623-8
401	2016	Dendrimer	O	Sphere	None	Commercial	Positive						HaCat	10000	H	Human	Skin	Keratinocyte	Adult	L	48	18.4782	MTT	TetrazoliumSalt		180.67		14	10.1007/s00216-016-9623-8
402	2016	Dendrimer	O	Sphere	None	Commercial	Positive						HaCat	10000	H	Human	Skin	Keratinocyte	Adult	L	48	36.9564	MTT	TetrazoliumSalt		169.47		14	10.1007/s00216-016-9623-8
403	2016	Dendrimer	O	Sphere	None	Commercial	Positive						HaCat	10000	H	Human	Skin	Keratinocyte	Adult	L	48	73.9128	MTT	TetrazoliumSalt		103.64		14	10.1007/s00216-016-9623-8
404	2016	Dendrimer	O	Sphere	None	Commercial	Positive						HaCat	10000	H	Human	Skin	Keratinocyte	Adult	L	48	110.869	MTT	TetrazoliumSalt		69.468		14	10.1007/s00216-016-9623-8
405	2016	Dendrimer	O	Sphere	None	Commercial	Positive						HaCat	10000	H	Human	Skin	Keratinocyte	Adult	L	48	147.826	MTT	TetrazoliumSalt		28.011		14	10.1007/s00216-016-9623-8
406	2016	Dendrimer	O	Sphere	None	Commercial	Positive						HaCat	10000	H	Human	Skin	Keratinocyte	Adult	L	72	2.27424	MTT	TetrazoliumSalt		89.076		14	10.1007/s00216-016-9623-8
407	2016	Dendrimer	O	Sphere	None	Commercial	Positive						HaCat	10000	H	Human	Skin	Keratinocyte	Adult	L	72	4.54848	MTT	TetrazoliumSalt		92.997		14	10.1007/s00216-016-9623-8
408	2016	Dendrimer	O	Sphere	None	Commercial	Positive						HaCat	10000	H	Human	Skin	Keratinocyte	Adult	L	72	9.2391	MTT	TetrazoliumSalt		115.41		14	10.1007/s00216-016-9623-8
409	2016	Dendrimer	O	Sphere	None	Commercial	Positive						HaCat	10000	H	Human	Skin	Keratinocyte	Adult	L	72	18.4782	MTT	TetrazoliumSalt		109.8		14	10.1007/s00216-016-9623-8
410	2016	Dendrimer	O	Sphere	None	Commercial	Positive						HaCat	10000	H	Human	Skin	Keratinocyte	Adult	L	72	36.9564	MTT	TetrazoliumSalt		128.29		14	10.1007/s00216-016-9623-8
411	2016	Dendrimer	O	Sphere	None	Commercial	Positive						HaCat	10000	H	Human	Skin	Keratinocyte	Adult	L	72	73.9128	MTT	TetrazoliumSalt		59.384		14	10.1007/s00216-016-9623-8
412	2016	Dendrimer	O	Sphere	None	Commercial	Positive						HaCat	10000	H	Human	Skin	Keratinocyte	Adult	L	72	110.869	MTT	TetrazoliumSalt		25.21		14	10.1007/s00216-016-9623-8
413	2016	Dendrimer	O	Sphere	None	Commercial	Positive						HaCat	10000	H	Human	Skin	Keratinocyte	Adult	L	72	147.826	MTT	TetrazoliumSalt		21.569		14	10.1007/s00216-016-9623-8
414	2016	Dendrimer	O	Sphere	NH2	Commercial	Negative	1.5		390.3	-13.06	-0.21	hNPC	100000	H	Human	Brain	Neuronal	Embryonic	P	24	5	MTT	TetrazoliumSalt		101.21		15	10.2131/jts.41.351
415	2016	Dendrimer	O	Sphere	NH2	Commercial	Neutral	2.2		221.7	0.01	-0.87	hNPC	100000	H	Human	Brain	Neuronal	Embryonic	P	24	5	MTT	TetrazoliumSalt		100.47		15	10.2131/jts.41.351
416	2016	Dendrimer	O	Sphere	NH2	Commercial	Positive	2.9		38.3	6.77	0.44	hNPC	100000	H	Human	Brain	Neuronal	Embryonic	P	24	5	MTT	TetrazoliumSalt		109.95		15	10.2131/jts.41.351
417	2016	Dendrimer	O	Sphere	NH2	Commercial	Positive	3.6		31.2	5.8	0.553	hNPC	100000	H	Human	Brain	Neuronal	Embryonic	P	24	5	MTT	TetrazoliumSalt		102.33		15	10.2131/jts.41.351
418	2016	Dendrimer	O	Sphere	NH2	Commercial	Positive	4.5		28.6	21.81	0.33	hNPC	100000	H	Human	Brain	Neuronal	Embryonic	P	24	5	MTT	TetrazoliumSalt		94.14		15	10.2131/jts.41.351
419	2016	Dendrimer	O	Sphere	NH2	Commercial	Positive	5.4		40.4	50.03	0.47	hNPC	100000	H	Human	Brain	Neuronal	Embryonic	P	24	5	MTT	TetrazoliumSalt		99.163		15	10.2131/jts.41.351
420	2016	Dendrimer	O	Sphere	NH2	Commercial	Positive	6.7		35.8	7.2	1.503	hNPC	100000	H	Human	Brain	Neuronal	Embryonic	P	24	5	MTT	TetrazoliumSalt		87.07		15	10.2131/jts.41.351
421	2016	Dendrimer	O	Sphere	NH2	Commercial	Positive	8.1		11	7.6	2.253	hNPC	100000	H	Human	Brain	Neuronal	Embryonic	P	24	5	MTT	TetrazoliumSalt		68.279		15	10.2131/jts.41.351
422	2016	Dendrimer	O	Sphere	None	Commercial	Negative	1.5		390.3	-13.06	-0.21	hNPC	100000	H	Human	Brain	Neuronal	Embryonic	P	24	10	MTT	TetrazoliumSalt		101.21		15	10.2131/jts.41.351
423	2016	Dendrimer	O	Sphere	None	Commercial	Neutral	2.2		221.7	0.01	-0.87	hNPC	100000	H	Human	Brain	Neuronal	Embryonic	P	24	10	MTT	TetrazoliumSalt		105.67		15	10.2131/jts.41.351
424	2016	Dendrimer	O	Sphere	None	Commercial	Positive	2.9		38.3	6.77	0.44	hNPC	100000	H	Human	Brain	Neuronal	Embryonic	P	24	10	MTT	TetrazoliumSalt		102.7		15	10.2131/jts.41.351
425	2016	Dendrimer	O	Sphere	None	Commercial	Positive	3.6		31.2	5.8	0.553	hNPC	100000	H	Human	Brain	Neuronal	Embryonic	P	24	10	MTT	TetrazoliumSalt		94.512		15	10.2131/jts.41.351
426	2016	Dendrimer	O	Sphere	None	Commercial	Positive	4.5		28.6	21.81	0.33	hNPC	100000	H	Human	Brain	Neuronal	Embryonic	P	24	10	MTT	TetrazoliumSalt		71.628		15	10.2131/jts.41.351
427	2016	Dendrimer	O	Sphere	None	Commercial	Positive	5.4		40.4	50.03	0.47	hNPC	100000	H	Human	Brain	Neuronal	Embryonic	P	24	10	MTT	TetrazoliumSalt		55.442		15	10.2131/jts.41.351
428	2016	Dendrimer	O	Sphere	None	Commercial	Positive	6.7		35.8	7.2	1.503	hNPC	100000	H	Human	Brain	Neuronal	Embryonic	P	24	10	MTT	TetrazoliumSalt		64.372		15	10.2131/jts.41.351
429	2016	Dendrimer	O	Sphere	None	Commercial	Positive	8.1		11	7.6	2.253	hNPC	100000	H	Human	Brain	Neuronal	Embryonic	P	24	10	MTT	TetrazoliumSalt		56.744		15	10.2131/jts.41.351
430	2016	Dendrimer	O	Sphere	None	Commercial	Negative	1.5		390.3	-13.06	-0.21	hNPC	100000	H	Human	Brain	Neuronal	Embryonic	P	24	100	MTT	TetrazoliumSalt		93.767		15	10.2131/jts.41.351
431	2016	Dendrimer	O	Sphere	None	Commercial	Neutral	2.2		221.7	0.01	-0.87	hNPC	100000	H	Human	Brain	Neuronal	Embryonic	P	24	100	MTT	TetrazoliumSalt		96.558		15	10.2131/jts.41.351
432	2016	Dendrimer	O	Sphere	None	Commercial	Positive	2.9		38.3	6.77	0.44	hNPC	100000	H	Human	Brain	Neuronal	Embryonic	P	24	100	MTT	TetrazoliumSalt		78.884		15	10.2131/jts.41.351
433	2016	Dendrimer	O	Sphere	None	Commercial	Positive	3.6		31.2	5.8	0.553	hNPC	100000	H	Human	Brain	Neuronal	Embryonic	P	24	100	MTT	TetrazoliumSalt		17.302		15	10.2131/jts.41.351
434	2016	Dendrimer	O	Sphere	None	Commercial	Positive	4.5		28.6	21.81	0.33	hNPC	100000	H	Human	Brain	Neuronal	Embryonic	P	24	100	MTT	TetrazoliumSalt		11.535		15	10.2131/jts.41.351
435	2016	Dendrimer	O	Sphere	None	Commercial	Positive	5.4		40.4	50.03	0.47	hNPC	100000	H	Human	Brain	Neuronal	Embryonic	P	24	100	MTT	TetrazoliumSalt		11.535		15	10.2131/jts.41.351
436	2016	Dendrimer	O	Sphere	None	Commercial	Positive	6.7		35.8	7.2	1.503	hNPC	100000	H	Human	Brain	Neuronal	Embryonic	P	24	100	MTT	TetrazoliumSalt		9.8605		15	10.2131/jts.41.351
437	2016	Dendrimer	O	Sphere	None	Commercial	Positive	8.1		11	7.6	2.253	hNPC	100000	H	Human	Brain	Neuronal	Embryonic	P	24	100	MTT	TetrazoliumSalt		5.5814		15	10.2131/jts.41.351
438	2016	Dendrimer	O	Sphere	None	Commercial	Negative	1.5		390.3	-13.06	-0.21	hNPC	100000	H	Human	Brain	Neuronal	Embryonic	P	72	5	MTT	TetrazoliumSalt		103.19		15	10.2131/jts.41.351
439	2016	Dendrimer	O	Sphere	None	Commercial	Neutral	2.2		221.7	0.01	-0.87	hNPC	100000	H	Human	Brain	Neuronal	Embryonic	P	72	5	MTT	TetrazoliumSalt		92.89		15	10.2131/jts.41.351
440	2016	Dendrimer	O	Sphere	None	Commercial	Positive	2.9		38.3	6.77	0.44	hNPC	100000	H	Human	Brain	Neuronal	Embryonic	P	72	5	MTT	TetrazoliumSalt		104.24		15	10.2131/jts.41.351
441	2016	Dendrimer	O	Sphere	None	Commercial	Positive	3.6		31.2	5.8	0.553	hNPC	100000	H	Human	Brain	Neuronal	Embryonic	P	72	5	MTT	TetrazoliumSalt		101.09		15	10.2131/jts.41.351
442	2016	Dendrimer	O	Sphere	None	Commercial	Positive	4.5		28.6	21.81	0.33	hNPC	100000	H	Human	Brain	Neuronal	Embryonic	P	72	5	MTT	TetrazoliumSalt		76.077		15	10.2131/jts.41.351
443	2016	Dendrimer	O	Sphere	None	Commercial	Positive	5.4		40.4	50.03	0.47	hNPC	100000	H	Human	Brain	Neuronal	Embryonic	P	72	5	MTT	TetrazoliumSalt		73.135		15	10.2131/jts.41.351
444	2016	Dendrimer	O	Sphere	None	Commercial	Positive	6.7		35.8	7.2	1.503	hNPC	100000	H	Human	Brain	Neuronal	Embryonic	P	72	5	MTT	TetrazoliumSalt		73.765		15	10.2131/jts.41.351
445	2016	Dendrimer	O	Sphere	None	Commercial	Positive	8.1		11	7.6	2.253	hNPC	100000	H	Human	Brain	Neuronal	Embryonic	P	72	5	MTT	TetrazoliumSalt		70.823		15	10.2131/jts.41.351
446	2016	Dendrimer	O	Sphere	None	Commercial	Negative	1.5		390.3	-13.06	-0.21	hNPC	100000	H	Human	Brain	Neuronal	Embryonic	P	72	10	MTT	TetrazoliumSalt		101.51		15	10.2131/jts.41.351
447	2016	Dendrimer	O	Sphere	None	Commercial	Neutral	2.2		221.7	0.01	-0.87	hNPC	100000	H	Human	Brain	Neuronal	Embryonic	P	72	10	MTT	TetrazoliumSalt		97.093		15	10.2131/jts.41.351
448	2016	Dendrimer	O	Sphere	None	Commercial	Positive	2.9		38.3	6.77	0.44	hNPC	100000	H	Human	Brain	Neuronal	Embryonic	P	72	10	MTT	TetrazoliumSalt		107.18		15	10.2131/jts.41.351
449	2016	Dendrimer	O	Sphere	None	Commercial	Positive	3.6		31.2	5.8	0.553	hNPC	100000	H	Human	Brain	Neuronal	Embryonic	P	72	10	MTT	TetrazoliumSalt		41.611		15	10.2131/jts.41.351
450	2016	Dendrimer	O	Sphere	None	Commercial	Positive	4.5		28.6	21.81	0.33	hNPC	100000	H	Human	Brain	Neuronal	Embryonic	P	72	10	MTT	TetrazoliumSalt		27.11		15	10.2131/jts.41.351
451	2016	Dendrimer	O	Sphere	None	Commercial	Positive	5.4		40.4	50.03	0.47	hNPC	100000	H	Human	Brain	Neuronal	Embryonic	P	72	10	MTT	TetrazoliumSalt		28.371		15	10.2131/jts.41.351
452	2016	Dendrimer	O	Sphere	None	Commercial	Positive	6.7		35.8	7.2	1.503	hNPC	100000	H	Human	Brain	Neuronal	Embryonic	P	72	10	MTT	TetrazoliumSalt		38.249		15	10.2131/jts.41.351
453	2016	Dendrimer	O	Sphere	None	Commercial	Positive	8.1		11	7.6	2.253	hNPC	100000	H	Human	Brain	Neuronal	Embryonic	P	72	10	MTT	TetrazoliumSalt		45.814		15	10.2131/jts.41.351
454	2016	Dendrimer	O	Sphere	None	Commercial	Negative	1.5		390.3	-13.06	-0.21	hNPC	100000	H	Human	Brain	Neuronal	Embryonic	P	72	100	MTT	TetrazoliumSalt		95.412		15	10.2131/jts.41.351
455	2016	Dendrimer	O	Sphere	None	Commercial	Neutral	2.2		221.7	0.01	-0.87	hNPC	100000	H	Human	Brain	Neuronal	Embryonic	P	72	100	MTT	TetrazoliumSalt		99.615		15	10.2131/jts.41.351
456	2016	Dendrimer	O	Sphere	None	Commercial	Positive	2.9		38.3	6.77	0.44	hNPC	100000	H	Human	Brain	Neuronal	Embryonic	P	72	100	MTT	TetrazoliumSalt		103.61		15	10.2131/jts.41.351
457	2016	Dendrimer	O	Sphere	None	Commercial	Positive	3.6		31.2	5.8	0.553	hNPC	100000	H	Human	Brain	Neuronal	Embryonic	P	72	100	MTT	TetrazoliumSalt		13.24		15	10.2131/jts.41.351
458	2016	Dendrimer	O	Sphere	None	Commercial	Positive	4.5		28.6	21.81	0.33	hNPC	100000	H	Human	Brain	Neuronal	Embryonic	P	72	100	MTT	TetrazoliumSalt		11.979		15	10.2131/jts.41.351
459	2016	Dendrimer	O	Sphere	None	Commercial	Positive	5.4		40.4	50.03	0.47	hNPC	100000	H	Human	Brain	Neuronal	Embryonic	P	72	100	MTT	TetrazoliumSalt		11.559		15	10.2131/jts.41.351
460	2016	Dendrimer	O	Sphere	None	Commercial	Positive	6.7		35.8	7.2	1.503	hNPC	100000	H	Human	Brain	Neuronal	Embryonic	P	72	100	MTT	TetrazoliumSalt		9.8774		15	10.2131/jts.41.351
461	2016	Dendrimer	O	Sphere	None	Commercial	Positive	8.1		11	7.6	2.253	hNPC	100000	H	Human	Brain	Neuronal	Embryonic	P	72	100	MTT	TetrazoliumSalt		9.2469		15	10.2131/jts.41.351
462	2016	Dendrimer	O	Sphere	OH	Commercial	Positive	4.5		8.4	9	0.13	hNPC	100000	H	Human	Brain	Neuronal	Embryonic	P	72	1	MTT	TetrazoliumSalt		107.16		15	10.2131/jts.41.351
463	2016	Dendrimer	O	Sphere	OS	Commercial	Positive	4.5		377.6	19.57	-2.967	hNPC	100000	H	Human	Brain	Neuronal	Embryonic	P	72	1	MTT	TetrazoliumSalt		91.852		15	10.2131/jts.41.351
464	2016	Dendrimer	O	Sphere	SC	Commercial	Negative	4.5		70.2	-23.98	-3.323	hNPC	100000	H	Human	Brain	Neuronal	Embryonic	P	72	1	MTT	TetrazoliumSalt		113.09		15	10.2131/jts.41.351
465	2016	Dendrimer	O	Sphere	C12	Commercial	Positive	4.5		984.4	54.47	-8.76	hNPC	100000	H	Human	Brain	Neuronal	Embryonic	P	72	1	MTT	TetrazoliumSalt		110.62		15	10.2131/jts.41.351
466	2016	Dendrimer	O	Sphere	OH	Commercial	Positive	4.5		8.4	9	0.13	hNPC	100000	H	Human	Brain	Neuronal	Embryonic	P	72	10	MTT	TetrazoliumSalt		119.26		15	10.2131/jts.41.351
467	2016	Dendrimer	O	Sphere	OS	Commercial	Positive	4.5		377.6	19.57	-2.967	hNPC	100000	H	Human	Brain	Neuronal	Embryonic	P	72	10	MTT	TetrazoliumSalt		84.938		15	10.2131/jts.41.351
468	2016	Dendrimer	O	Sphere	SC	Commercial	Negative	4.5		70.2	-23.98	-3.323	hNPC	100000	H	Human	Brain	Neuronal	Embryonic	P	72	10	MTT	TetrazoliumSalt		114.32		15	10.2131/jts.41.351
469	2016	Dendrimer	O	Sphere	C12	Commercial	Positive	4.5		984.4	54.47	-8.76	hNPC	100000	H	Human	Brain	Neuronal	Embryonic	P	72	10	MTT	TetrazoliumSalt		39.012		15	10.2131/jts.41.351
470	2016	Dendrimer	O	Sphere	OH	Commercial	Positive	4.5		8.4	9	0.13	hNPC	100000	H	Human	Brain	Neuronal	Embryonic	P	72	100	MTT	TetrazoliumSalt		110.86		15	10.2131/jts.41.351
471	2016	Dendrimer	O	Sphere	OS	Commercial	Positive	4.5		377.6	19.57	-2.967	hNPC	100000	H	Human	Brain	Neuronal	Embryonic	P	72	100	MTT	TetrazoliumSalt		92.346		15	10.2131/jts.41.351
472	2016	Dendrimer	O	Sphere	SC	Commercial	Negative	4.5		70.2	-23.98	-3.323	hNPC	100000	H	Human	Brain	Neuronal	Embryonic	P	72	100	MTT	TetrazoliumSalt		118.02		15	10.2131/jts.41.351
473	2016	Dendrimer	O	Sphere	C12	Commercial	Positive	4.5		984.4	54.47	-8.76	hNPC	100000	H	Human	Brain	Neuronal	Embryonic	P	72	100	MTT	TetrazoliumSalt		13.086		15	10.2131/jts.41.351
474	2015	PLGA	O	Sphere	None	Emulsion-Solvent Evaporation	Negative		120		-11		MDBK	10000	A	Cow	Kidney	Epithelial	Adult	L	24	312	MTS	TetrazoliumSalt		99.597	0.109	16	10.1002/jbm.a.35498
475	2015	PLGA	O	Sphere	None	Emulsion-Solvent Evaporation	Negative		120		-11		MDBK	10000	A	Cow	Kidney	Epithelial	Adult	L	24	625	MTS	TetrazoliumSalt		97.935	0.109	16	10.1002/jbm.a.35498
476	2015	PLGA	O	Sphere	None	Emulsion-Solvent Evaporation	Negative		120		-11		MDBK	10000	A	Cow	Kidney	Epithelial	Adult	L	24	1250	MTS	TetrazoliumSalt		97.33	0.109	16	10.1002/jbm.a.35498
477	2015	PLGA	O	Sphere	None	Emulsion-Solvent Evaporation	Negative		120		-11		MDBK	10000	A	Cow	Kidney	Epithelial	Adult	L	24	2500	MTS	TetrazoliumSalt		95.365	0.109	16	10.1002/jbm.a.35498
478	2015	PLGA	O	Sphere	None	Emulsion-Solvent Evaporation	Negative		120		-11		MDBK	10000	A	Cow	Kidney	Epithelial	Adult	L	24	5000	MTS	TetrazoliumSalt		73.602	0.109	16	10.1002/jbm.a.35498
479	2015	PLGA	O	Sphere	Chitosan	Emulsion-Solvent Evaporation	Positive		204		10		MDBK	10000	A	Cow	Kidney	Epithelial	Adult	L	24	312	MTS	TetrazoliumSalt		97.632	0.233	16	10.1002/jbm.a.35498
480	2015	PLGA	O	Sphere	Chitosan	Emulsion-Solvent Evaporation	Positive		204		10		MDBK	10000	A	Cow	Kidney	Epithelial	Adult	L	24	625	MTS	TetrazoliumSalt		96.121	0.233	16	10.1002/jbm.a.35498
481	2015	PLGA	O	Sphere	Chitosan	Emulsion-Solvent Evaporation	Positive		204		10		MDBK	10000	A	Cow	Kidney	Epithelial	Adult	L	24	1250	MTS	TetrazoliumSalt		95.365	0.233	16	10.1002/jbm.a.35498
482	2015	PLGA	O	Sphere	Chitosan	Emulsion-Solvent Evaporation	Positive		204		10		MDBK	10000	A	Cow	Kidney	Epithelial	Adult	L	24	2500	MTS	TetrazoliumSalt		87.506	0.233	16	10.1002/jbm.a.35498
483	2015	PLGA	O	Sphere	Chitosan	Emulsion-Solvent Evaporation	Positive		204		10		MDBK	10000	A	Cow	Kidney	Epithelial	Adult	L	24	5000	MTS	TetrazoliumSalt		72.544	0.233	16	10.1002/jbm.a.35498
484	2015	PLGA	O	Sphere	None	Emulsion-Solvent Evaporation	Negative		120		-11		Colo_205	10000	H	Human	Colon	Epithelial	Adult	L	24	312	MTS	TetrazoliumSalt		98.674	0.109	16	10.1002/jbm.a.35498
485	2015	PLGA	O	Sphere	None	Emulsion-Solvent Evaporation	Negative		120		-11		Colo_205	10000	H	Human	Colon	Epithelial	Adult	L	24	625	MTS	TetrazoliumSalt		97.082	0.109	16	10.1002/jbm.a.35498
486	2015	PLGA	O	Sphere	None	Emulsion-Solvent Evaporation	Negative		120		-11		Colo_205	10000	H	Human	Colon	Epithelial	Adult	L	24	1250	MTS	TetrazoliumSalt		95.491	0.109	16	10.1002/jbm.a.35498
487	2015	PLGA	O	Sphere	None	Emulsion-Solvent Evaporation	Negative		120		-11		Colo_205	10000	H	Human	Colon	Epithelial	Adult	L	24	2500	MTS	TetrazoliumSalt		87.851	0.109	16	10.1002/jbm.a.35498
488	2015	PLGA	O	Sphere	None	Emulsion-Solvent Evaporation	Negative		120		-11		Colo_205	10000	H	Human	Colon	Epithelial	Adult	L	24	5000	MTS	TetrazoliumSalt		83.077	0.109	16	10.1002/jbm.a.35498
489	2015	PLGA	O	Sphere	Chitosan	Emulsion-Solvent Evaporation	Positive		204		10		Colo_205	10000	H	Human	Colon	Epithelial	Adult	L	24	312	MTS	TetrazoliumSalt		99.31	0.233	16	10.1002/jbm.a.35498
490	2015	PLGA	O	Sphere	Chitosan	Emulsion-Solvent Evaporation	Positive		204		10		Colo_205	10000	H	Human	Colon	Epithelial	Adult	L	24	625	MTS	TetrazoliumSalt		96.923	0.233	16	10.1002/jbm.a.35498
491	2015	PLGA	O	Sphere	Chitosan	Emulsion-Solvent Evaporation	Positive		204		10		Colo_205	10000	H	Human	Colon	Epithelial	Adult	L	24	1250	MTS	TetrazoliumSalt		92.944	0.233	16	10.1002/jbm.a.35498
492	2015	PLGA	O	Sphere	Chitosan	Emulsion-Solvent Evaporation	Positive		204		10		Colo_205	10000	H	Human	Colon	Epithelial	Adult	L	24	2500	MTS	TetrazoliumSalt		90.716	0.233	16	10.1002/jbm.a.35498
493	2015	PLGA	O	Sphere	Chitosan	Emulsion-Solvent Evaporation	Positive		204		10		Colo_205	10000	H	Human	Colon	Epithelial	Adult	L	24	5000	MTS	TetrazoliumSalt		86.897	0.233	16	10.1002/jbm.a.35498
494	2011	PLGA	O	Sphere	Chitosan	Emulsion-Solvent Evaporation	Positive	230	225	216	32	8	Calu-3	25000	H	Human	Lung	Epithelial	Adult	L	72	300	MTT	TetrazoliumSalt		89.009	0.2	17	10.2147/IJN.S24552
495	2011	PLGA	O	Sphere	Chitosan	Emulsion-Solvent Evaporation	Positive	230	225	216	32	8	Calu-3	25000	H	Human	Lung	Epithelial	Adult	L	72	1000	MTT	TetrazoliumSalt		82.358	0.2	17	10.2147/IJN.S24552
496	2011	PLGA	O	Sphere	Chitosan	Emulsion-Solvent Evaporation	Positive	230	225	216	32	8	Calu-3	25000	H	Human	Lung	Epithelial	Adult	L	72	1500	MTT	TetrazoliumSalt		76.274	0.2	17	10.2147/IJN.S24552
497	2011	PLGA	O	Sphere	Chitosan	Emulsion-Solvent Evaporation	Positive	230	225	216	32	8	Calu-3	25000	H	Human	Lung	Epithelial	Adult	L	72	3000	MTT	TetrazoliumSalt		74.151	0.2	17	10.2147/IJN.S24552
498	2011	PLGA	O	Sphere	Poloxamer	Emulsion-Solvent Evaporation	Negative	105	103	128	-24	-18	Calu-3	25000	H	Human	Lung	Epithelial	Adult	L	72	5000	MTT	TetrazoliumSalt		74.575	0.13	17	10.2147/IJN.S24552
499	2011	PLGA	O	Sphere	Poloxamer	Emulsion-Solvent Evaporation	Negative	105	103	128	-24	-18	Calu-3	25000	H	Human	Lung	Epithelial	Adult	L	72	300	MTT	TetrazoliumSalt		85.613	0.13	17	10.2147/IJN.S24552
500	2011	PLGA	O	Sphere	Poloxamer	Emulsion-Solvent Evaporation	Negative	105	103	128	-24	-18	Calu-3	25000	H	Human	Lung	Epithelial	Adult	L	72	1000	MTT	TetrazoliumSalt		73.726	0.13	17	10.2147/IJN.S24552
501	2011	PLGA	O	Sphere	Poloxamer	Emulsion-Solvent Evaporation	Negative	105	103	128	-24	-18	Calu-3	25000	H	Human	Lung	Epithelial	Adult	L	72	1500	MTT	TetrazoliumSalt		72.453	0.13	17	10.2147/IJN.S24552
502	2011	PLGA	O	Sphere	Poloxamer	Emulsion-Solvent Evaporation	Negative	105	103	128	-24	-18	Calu-3	25000	H	Human	Lung	Epithelial	Adult	L	72	3000	MTT	TetrazoliumSalt		63.255	0.13	17	10.2147/IJN.S24552
503	2011	PLGA	O	Sphere	Poloxamer	Emulsion-Solvent Evaporation	Negative	105	103	128	-24	-18	Calu-3	25000	H	Human	Lung	Epithelial	Adult	L	72	5000	MTT	TetrazoliumSalt		57.877	0.13	17	10.2147/IJN.S24552
504	2011	PLGA	O	Sphere	PVA	Emulsion-Solvent Evaporation	Negative	230	201	156	-5	-2	Calu-3	25000	H	Human	Lung	Epithelial	Adult	L	72	300	MTT	TetrazoliumSalt		85.896	0.12	17	10.2147/IJN.S24552
505	2011	PLGA	O	Sphere	PVA	Emulsion-Solvent Evaporation	Negative	230	201	156	-5	-2	Calu-3	25000	H	Human	Lung	Epithelial	Adult	L	72	1000	MTT	TetrazoliumSalt		65.236	0.12	17	10.2147/IJN.S24552
506	2011	PLGA	O	Sphere	PVA	Emulsion-Solvent Evaporation	Negative	230	201	156	-5	-2	Calu-3	25000	H	Human	Lung	Epithelial	Adult	L	72	1500	MTT	TetrazoliumSalt		63.821	0.12	17	10.2147/IJN.S24552
507	2011	PLGA	O	Sphere	PVA	Emulsion-Solvent Evaporation	Negative	230	201	156	-5	-2	Calu-3	25000	H	Human	Lung	Epithelial	Adult	L	72	3000	MTT	TetrazoliumSalt		63.538	0.12	17	10.2147/IJN.S24552
508	2011	PLGA	O	Sphere	PVA	Emulsion-Solvent Evaporation	Negative	230	201	156	-5	-2	Calu-3	25000	H	Human	Lung	Epithelial	Adult	L	72	5000	MTT	TetrazoliumSalt		65.236	0.12	17	10.2147/IJN.S24552
509	2011	PLGA	O	Sphere	Chitosan	Emulsion-Solvent Evaporation	Positive	230	218	217	32	8	Calu-3	25000	H	Human	Lung	Epithelial	Adult	L	4	200	MTT	TetrazoliumSalt		102.57	0.2	17	10.2147/IJN.S24552
510	2011	PLGA	O	Sphere	Chitosan	Emulsion-Solvent Evaporation	Positive	230	218	217	32	8	Calu-3	25000	H	Human	Lung	Epithelial	Adult	L	4	500	MTT	TetrazoliumSalt		101.47	0.2	17	10.2147/IJN.S24552
511	2011	PLGA	O	Sphere	Chitosan	Emulsion-Solvent Evaporation	Positive	230	218	217	32	8	Calu-3	25000	H	Human	Lung	Epithelial	Adult	L	4	1000	MTT	TetrazoliumSalt		101.32	0.2	17	10.2147/IJN.S24552
512	2011	PLGA	O	Sphere	Chitosan	Emulsion-Solvent Evaporation	Positive	230	218	217	32	8	Calu-3	25000	H	Human	Lung	Epithelial	Adult	L	4	3000	MTT	TetrazoliumSalt		98.78	0.2	17	10.2147/IJN.S24552
513	2011	PLGA	O	Sphere	Chitosan	Emulsion-Solvent Evaporation	Positive	230	218	217	32	8	Calu-3	25000	H	Human	Lung	Epithelial	Adult	L	4	5000	MTT	TetrazoliumSalt		95.641	0.2	17	10.2147/IJN.S24552
514	2011	PLGA	O	Sphere	Chitosan	Emulsion-Solvent Evaporation	Positive	230	227	166	32	8	Calu-3	25000	H	Human	Lung	Epithelial	Adult	L	24	200	MTT	TetrazoliumSalt		100.12	0.2	17	10.2147/IJN.S24552
515	2011	PLGA	O	Sphere	Chitosan	Emulsion-Solvent Evaporation	Positive	230	227	166	32	8	Calu-3	25000	H	Human	Lung	Epithelial	Adult	L	24	500	MTT	TetrazoliumSalt		98.63	0.2	17	10.2147/IJN.S24552
516	2011	PLGA	O	Sphere	Chitosan	Emulsion-Solvent Evaporation	Positive	230	227	166	32	8	Calu-3	25000	H	Human	Lung	Epithelial	Adult	L	24	1000	MTT	TetrazoliumSalt		97.285	0.2	17	10.2147/IJN.S24552
517	2011	PLGA	O	Sphere	Chitosan	Emulsion-Solvent Evaporation	Positive	230	227	166	32	8	Calu-3	25000	H	Human	Lung	Epithelial	Adult	L	24	3000	MTT	TetrazoliumSalt		90.859	0.2	17	10.2147/IJN.S24552
518	2011	PLGA	O	Sphere	Chitosan	Emulsion-Solvent Evaporation	Positive	230	227	166	32	8	Calu-3	25000	H	Human	Lung	Epithelial	Adult	L	24	5000	MTT	TetrazoliumSalt		88.02	0.2	17	10.2147/IJN.S24552
519	2011	PLGA	O	Sphere	Poloxamer	Emulsion-Solvent Evaporation	Negative	105	102	113	-24	-18	Calu-3	25000	H	Human	Lung	Epithelial	Adult	L	4	200	MTT	TetrazoliumSalt		113.08	0.13	17	10.2147/IJN.S24552
520	2011	PLGA	O	Sphere	Poloxamer	Emulsion-Solvent Evaporation	Negative	105	102	113	-24	-18	Calu-3	25000	H	Human	Lung	Epithelial	Adult	L	4	500	MTT	TetrazoliumSalt		119.95	0.13	17	10.2147/IJN.S24552
521	2011	PLGA	O	Sphere	Poloxamer	Emulsion-Solvent Evaporation	Negative	105	102	113	-24	-18	Calu-3	25000	H	Human	Lung	Epithelial	Adult	L	4	1000	MTT	TetrazoliumSalt		126.63	0.13	17	10.2147/IJN.S24552
522	2011	PLGA	O	Sphere	Poloxamer	Emulsion-Solvent Evaporation	Negative	105	102	113	-24	-18	Calu-3	25000	H	Human	Lung	Epithelial	Adult	L	4	3000	MTT	TetrazoliumSalt		113.45	0.13	17	10.2147/IJN.S24552
523	2011	PLGA	O	Sphere	Poloxamer	Emulsion-Solvent Evaporation	Negative	105	102	113	-24	-18	Calu-3	25000	H	Human	Lung	Epithelial	Adult	L	4	5000	MTT	TetrazoliumSalt		103.33	0.13	17	10.2147/IJN.S24552
524	2011	PLGA	O	Sphere	Poloxamer	Emulsion-Solvent Evaporation	Negative	105	101	123	-24	-18	Calu-3	25000	H	Human	Lung	Epithelial	Adult	L	24	200	MTT	TetrazoliumSalt		102.97	0.13	17	10.2147/IJN.S24552
525	2011	PLGA	O	Sphere	Poloxamer	Emulsion-Solvent Evaporation	Negative	105	101	123	-24	-18	Calu-3	25000	H	Human	Lung	Epithelial	Adult	L	24	500	MTT	TetrazoliumSalt		100.26	0.13	17	10.2147/IJN.S24552
526	2011	PLGA	O	Sphere	Poloxamer	Emulsion-Solvent Evaporation	Negative	105	101	123	-24	-18	Calu-3	25000	H	Human	Lung	Epithelial	Adult	L	24	1000	MTT	TetrazoliumSalt		96.465	0.13	17	10.2147/IJN.S24552
527	2011	PLGA	O	Sphere	Poloxamer	Emulsion-Solvent Evaporation	Negative	105	101	123	-24	-18	Calu-3	25000	H	Human	Lung	Epithelial	Adult	L	24	3000	MTT	TetrazoliumSalt		87.432	0.13	17	10.2147/IJN.S24552
528	2011	PLGA	O	Sphere	Poloxamer	Emulsion-Solvent Evaporation	Negative	105	101	123	-24	-18	Calu-3	25000	H	Human	Lung	Epithelial	Adult	L	24	5000	MTT	TetrazoliumSalt		89.239	0.13	17	10.2147/IJN.S24552
529	2011	PLGA	O	Sphere	PVA	Emulsion-Solvent Evaporation	Negative	230	205	159	-5	-2	Calu-3	25000	H	Human	Lung	Epithelial	Adult	L	4	200	MTT	TetrazoliumSalt		98.143	0.12	17	10.2147/IJN.S24552
530	2011	PLGA	O	Sphere	PVA	Emulsion-Solvent Evaporation	Negative	230	205	159	-5	-2	Calu-3	25000	H	Human	Lung	Epithelial	Adult	L	4	500	MTT	TetrazoliumSalt		94.286	0.12	17	10.2147/IJN.S24552
531	2011	PLGA	O	Sphere	PVA	Emulsion-Solvent Evaporation	Negative	230	205	159	-5	-2	Calu-3	25000	H	Human	Lung	Epithelial	Adult	L	4	1000	MTT	TetrazoliumSalt		98.857	0.12	17	10.2147/IJN.S24552
532	2011	PLGA	O	Sphere	PVA	Emulsion-Solvent Evaporation	Negative	230	205	159	-5	-2	Calu-3	25000	H	Human	Lung	Epithelial	Adult	L	4	3000	MTT	TetrazoliumSalt		95.143	0.12	17	10.2147/IJN.S24552
533	2011	PLGA	O	Sphere	PVA	Emulsion-Solvent Evaporation	Negative	230	205	159	-5	-2	Calu-3	25000	H	Human	Lung	Epithelial	Adult	L	4	5000	MTT	TetrazoliumSalt		91.857	0.12	17	10.2147/IJN.S24552
534	2011	PLGA	O	Sphere	PVA	Emulsion-Solvent Evaporation	Negative	230	203	141	-5	-2	Calu-3	25000	H	Human	Lung	Epithelial	Adult	L	24	200	MTT	TetrazoliumSalt		95.714	0.12	17	10.2147/IJN.S24552
535	2011	PLGA	O	Sphere	PVA	Emulsion-Solvent Evaporation	Negative	230	203	141	-5	-2	Calu-3	25000	H	Human	Lung	Epithelial	Adult	L	24	500	MTT	TetrazoliumSalt		90.143	0.12	17	10.2147/IJN.S24552
536	2011	PLGA	O	Sphere	PVA	Emulsion-Solvent Evaporation	Negative	230	203	141	-5	-2	Calu-3	25000	H	Human	Lung	Epithelial	Adult	L	24	1000	MTT	TetrazoliumSalt		86.857	0.12	17	10.2147/IJN.S24552
537	2011	PLGA	O	Sphere	PVA	Emulsion-Solvent Evaporation	Negative	230	203	141	-5	-2	Calu-3	25000	H	Human	Lung	Epithelial	Adult	L	24	3000	MTT	TetrazoliumSalt		82.571	0.12	17	10.2147/IJN.S24552
538	2011	PLGA	O	Sphere	PVA	Emulsion-Solvent Evaporation	Negative	230	203	141	-5	-2	Calu-3	25000	H	Human	Lung	Epithelial	Adult	L	24	5000	MTT	TetrazoliumSalt		80.143	0.12	17	10.2147/IJN.S24552
539	2019	Alginate	O	Sphere	PEA	Chemical Modification			425.3				Caco-2	30000	H	Human	Colon	Epithelial	Adult	L	48	50	MTT	TetrazoliumSalt		96.842		18	10.3390/molecules24030555
540	2019	Alginate	O	Sphere	PEA	Chemical Modification			425.3				Caco-2	30000	H	Human	Colon	Epithelial	Adult	L	48	250	MTT	TetrazoliumSalt		96.561		18	10.3390/molecules24030555
541	2019	Alginate	O	Sphere	PEA	Chemical Modification			425.3				Caco-2	30000	H	Human	Colon	Epithelial	Adult	L	48	500	MTT	TetrazoliumSalt		95.579		18	10.3390/molecules24030555
542	2019	Alginate	O	Sphere	PEA	Chemical Modification			425.3				Caco-2	30000	H	Human	Colon	Epithelial	Adult	L	48	1000	MTT	TetrazoliumSalt		92.491		18	10.3390/molecules24030555
543	2019	Alginate	O	Sphere	PEA	Chemical Modification			275				Caco-2	30000	H	Human	Colon	Epithelial	Adult	L	48	50	MTT	TetrazoliumSalt		95.86		18	10.3390/molecules24030555
544	2019	Alginate	O	Sphere	PEA	Chemical Modification			275				Caco-2	30000	H	Human	Colon	Epithelial	Adult	L	48	250	MTT	TetrazoliumSalt		93.614		18	10.3390/molecules24030555
545	2019	Alginate	O	Sphere	PEA	Chemical Modification			275				Caco-2	30000	H	Human	Colon	Epithelial	Adult	L	48	500	MTT	TetrazoliumSalt		94.877		18	10.3390/molecules24030555
546	2019	Alginate	O	Sphere	PEA	Chemical Modification			275				Caco-2	30000	H	Human	Colon	Epithelial	Adult	L	48	1000	MTT	TetrazoliumSalt		91.93		18	10.3390/molecules24030555
547	2019	Alginate	O	Sphere	PEA	Chemical Modification			226.7				Caco-2	30000	H	Human	Colon	Epithelial	Adult	L	48	50	MTT	TetrazoliumSalt		95.298		18	10.3390/molecules24030555
548	2019	Alginate	O	Sphere	PEA	Chemical Modification			226.7				Caco-2	30000	H	Human	Colon	Epithelial	Adult	L	48	250	MTT	TetrazoliumSalt		93.053		18	10.3390/molecules24030555
549	2019	Alginate	O	Sphere	PEA	Chemical Modification			226.7				Caco-2	30000	H	Human	Colon	Epithelial	Adult	L	48	500	MTT	TetrazoliumSalt		93.754		18	10.3390/molecules24030555
550	2019	Alginate	O	Sphere	PEA	Chemical Modification			226.7				Caco-2	30000	H	Human	Colon	Epithelial	Adult	L	48	1000	MTT	TetrazoliumSalt		89.544		18	10.3390/molecules24030555
551	2018	PTFE-PMMA	O	Irregular	None	Free Radical Polymerization	Negative		544.5	691.6	-8.6	-7.5	HepG2	10000	H	Human	Liver	Epithelial	Adult	L	24	10	AlamarBlue	AlamarBlue		100.26		19	10.1016/j.jes.2017.10.014
552	2018	PTFE-PMMA	O	Irregular	None	Free Radical Polymerization	Negative		544.5	691.6	-8.6	-7.5	HepG2	10000	H	Human	Liver	Epithelial	Adult	L	24	20	AlamarBlue	AlamarBlue		100.02		19	10.1016/j.jes.2017.10.014
553	2018	PTFE-PMMA	O	Irregular	None	Free Radical Polymerization	Negative		544.5	691.6	-8.6	-7.5	HepG2	10000	H	Human	Liver	Epithelial	Adult	L	24	50	AlamarBlue	AlamarBlue		97.408		19	10.1016/j.jes.2017.10.014
554	2018	PTFE-PMMA	O	Irregular	None	Free Radical Polymerization	Negative		544.5	691.6	-8.6	-7.5	HepG2	10000	H	Human	Liver	Epithelial	Adult	L	24	100	AlamarBlue	AlamarBlue		90.756		19	10.1016/j.jes.2017.10.014
555	2018	PTFE-PMMA	O	Irregular	None	Free Radical Polymerization	Negative		544.5	691.6	-8.6	-7.5	HepG2	10000	H	Human	Liver	Epithelial	Adult	L	24	200	AlamarBlue	AlamarBlue		77.095		19	10.1016/j.jes.2017.10.014
556	2018	PTFE-PMMA	O	Irregular	None	Free Radical Polymerization	Negative		544.5	691.6	-8.6	-7.5	HepG2	10000	H	Human	Liver	Epithelial	Adult	L	24	400	AlamarBlue	AlamarBlue		35.162		19	10.1016/j.jes.2017.10.014
557	2018	PTFE-PMMA	O	Irregular	None	Free Radical Polymerization	Negative		715.3	730.8	-4.5	-8	HepG2	10000	H	Human	Liver	Epithelial	Adult	L	24	10	AlamarBlue	AlamarBlue		97.527		19	10.1016/j.jes.2017.10.014
558	2018	PTFE-PMMA	O	Irregular	None	Free Radical Polymerization	Negative		715.3	730.8	-4.5	-8	HepG2	10000	H	Human	Liver	Epithelial	Adult	L	24	20	AlamarBlue	AlamarBlue		96.577		19	10.1016/j.jes.2017.10.014
559	2018	PTFE-PMMA	O	Irregular	None	Free Radical Polymerization	Negative		715.3	730.8	-4.5	-8	HepG2	10000	H	Human	Liver	Epithelial	Adult	L	24	50	AlamarBlue	AlamarBlue		89.924		19	10.1016/j.jes.2017.10.014
560	2018	PTFE-PMMA	O	Irregular	None	Free Radical Polymerization	Negative		715.3	730.8	-4.5	-8	HepG2	10000	H	Human	Liver	Epithelial	Adult	L	24	100	AlamarBlue	AlamarBlue		82.322		19	10.1016/j.jes.2017.10.014
561	2018	PTFE-PMMA	O	Irregular	None	Free Radical Polymerization	Negative		715.3	730.8	-4.5	-8	HepG2	10000	H	Human	Liver	Epithelial	Adult	L	24	200	AlamarBlue	AlamarBlue		67.592		19	10.1016/j.jes.2017.10.014
562	2018	PTFE-PMMA	O	Irregular	None	Free Radical Polymerization	Negative		715.3	730.8	-4.5	-8	HepG2	10000	H	Human	Liver	Epithelial	Adult	L	24	400	AlamarBlue	AlamarBlue		34.093		19	10.1016/j.jes.2017.10.014
563	2018	PTFE-PMMA	O	Irregular	None	Free Radical Polymerization	Negative		744.7	957.4	-2.2	-8.3	HepG2	10000	H	Human	Liver	Epithelial	Adult	L	24	10	AlamarBlue	AlamarBlue		95.27		19	10.1016/j.jes.2017.10.014
564	2018	PTFE-PMMA	O	Irregular	None	Free Radical Polymerization	Negative		744.7	957.4	-2.2	-8.3	HepG2	10000	H	Human	Liver	Epithelial	Adult	L	24	20	AlamarBlue	AlamarBlue		94.557		19	10.1016/j.jes.2017.10.014
565	2018	PTFE-PMMA	O	Irregular	None	Free Radical Polymerization	Negative		744.7	957.4	-2.2	-8.3	HepG2	10000	H	Human	Liver	Epithelial	Adult	L	24	50	AlamarBlue	AlamarBlue		88.024		19	10.1016/j.jes.2017.10.014
566	2018	PTFE-PMMA	O	Irregular	None	Free Radical Polymerization	Negative		744.7	957.4	-2.2	-8.3	HepG2	10000	H	Human	Liver	Epithelial	Adult	L	24	100	AlamarBlue	AlamarBlue		80.778		19	10.1016/j.jes.2017.10.014
567	2018	PTFE-PMMA	O	Irregular	None	Free Radical Polymerization	Negative		744.7	957.4	-2.2	-8.3	HepG2	10000	H	Human	Liver	Epithelial	Adult	L	24	200	AlamarBlue	AlamarBlue		66.523		19	10.1016/j.jes.2017.10.014
568	2018	PTFE-PMMA	O	Irregular	None	Free Radical Polymerization	Negative		744.7	957.4	-2.2	-8.3	HepG2	10000	H	Human	Liver	Epithelial	Adult	L	24	400	AlamarBlue	AlamarBlue		31.955		19	10.1016/j.jes.2017.10.014
569	2018	PTFE-PMMA	O	Irregular	None	Free Radical Polymerization	Negative		544.5	691.6	-8.6	-7.5	J774A.1	10000	A	Mouse	Ascites	Macrophage	Adult	L	24	10	AlamarBlue	AlamarBlue		99.691		19	10.1016/j.jes.2017.10.014
570	2018	PTFE-PMMA	O	Irregular	None	Free Radical Polymerization	Negative		544.5	691.6	-8.6	-7.5	J774A.1	10000	A	Mouse	Ascites	Macrophage	Adult	L	24	20	AlamarBlue	AlamarBlue		96.411		19	10.1016/j.jes.2017.10.014
571	2018	PTFE-PMMA	O	Irregular	None	Free Radical Polymerization	Negative		544.5	691.6	-8.6	-7.5	J774A.1	10000	A	Mouse	Ascites	Macrophage	Adult	L	24	50	AlamarBlue	AlamarBlue		96.411		19	10.1016/j.jes.2017.10.014
572	2018	PTFE-PMMA	O	Irregular	None	Free Radical Polymerization	Negative		544.5	691.6	-8.6	-7.5	J774A.1	10000	A	Mouse	Ascites	Macrophage	Adult	L	24	100	AlamarBlue	AlamarBlue		98.52		19	10.1016/j.jes.2017.10.014
573	2018	PTFE-PMMA	O	Irregular	None	Free Radical Polymerization	Negative		544.5	691.6	-8.6	-7.5	J774A.1	10000	A	Mouse	Ascites	Macrophage	Adult	L	24	200	AlamarBlue	AlamarBlue		87.274		19	10.1016/j.jes.2017.10.014
574	2018	PTFE-PMMA	O	Irregular	None	Free Radical Polymerization	Negative		544.5	691.6	-8.6	-7.5	J774A.1	10000	A	Mouse	Ascites	Macrophage	Adult	L	24	400	AlamarBlue	AlamarBlue		52.364		19	10.1016/j.jes.2017.10.014
575	2018	PTFE-PMMA	O	Irregular	None	Free Radical Polymerization	Negative		715.3	730.8	-4.5	-8	J774A.1	10000	A	Mouse	Ascites	Macrophage	Adult	L	24	10	AlamarBlue	AlamarBlue		99.925		19	10.1016/j.jes.2017.10.014
576	2018	PTFE-PMMA	O	Irregular	None	Free Radical Polymerization	Negative		715.3	730.8	-4.5	-8	J774A.1	10000	A	Mouse	Ascites	Macrophage	Adult	L	24	20	AlamarBlue	AlamarBlue		99.925		19	10.1016/j.jes.2017.10.014
577	2018	PTFE-PMMA	O	Irregular	None	Free Radical Polymerization	Negative		715.3	730.8	-4.5	-8	J774A.1	10000	A	Mouse	Ascites	Macrophage	Adult	L	24	50	AlamarBlue	AlamarBlue		99.925		19	10.1016/j.jes.2017.10.014
578	2018	PTFE-PMMA	O	Irregular	None	Free Radical Polymerization	Negative		715.3	730.8	-4.5	-8	J774A.1	10000	A	Mouse	Ascites	Macrophage	Adult	L	24	100	AlamarBlue	AlamarBlue		99.925		19	10.1016/j.jes.2017.10.014
579	2018	PTFE-PMMA	O	Irregular	None	Free Radical Polymerization	Negative		715.3	730.8	-4.5	-8	J774A.1	10000	A	Mouse	Ascites	Macrophage	Adult	L	24	200	AlamarBlue	AlamarBlue		81.065		19	10.1016/j.jes.2017.10.014
580	2018	PTFE-PMMA	O	Irregular	None	Free Radical Polymerization	Negative		715.3	730.8	-4.5	-8	J774A.1	10000	A	Mouse	Ascites	Macrophage	Adult	L	24	400	AlamarBlue	AlamarBlue		49.553		19	10.1016/j.jes.2017.10.014
581	2018	PTFE-PMMA	O	Irregular	None	Free Radical Polymerization	Negative		744.7	957.4	-2.2	-8.3	J774A.1	10000	A	Mouse	Ascites	Macrophage	Adult	L	24	10	AlamarBlue	AlamarBlue		99.925		19	10.1016/j.jes.2017.10.014
582	2018	PTFE-PMMA	O	Irregular	None	Free Radical Polymerization	Negative		744.7	957.4	-2.2	-8.3	J774A.1	10000	A	Mouse	Ascites	Macrophage	Adult	L	24	20	AlamarBlue	AlamarBlue		98.988		19	10.1016/j.jes.2017.10.014
583	2018	PTFE-PMMA	O	Irregular	None	Free Radical Polymerization	Negative		744.7	957.4	-2.2	-8.3	J774A.1	10000	A	Mouse	Ascites	Macrophage	Adult	L	24	50	AlamarBlue	AlamarBlue		97.817		19	10.1016/j.jes.2017.10.014
584	2018	PTFE-PMMA	O	Irregular	None	Free Radical Polymerization	Negative		744.7	957.4	-2.2	-8.3	J774A.1	10000	A	Mouse	Ascites	Macrophage	Adult	L	24	100	AlamarBlue	AlamarBlue		93.131		19	10.1016/j.jes.2017.10.014
585	2018	PTFE-PMMA	O	Irregular	None	Free Radical Polymerization	Negative		744.7	957.4	-2.2	-8.3	J774A.1	10000	A	Mouse	Ascites	Macrophage	Adult	L	24	200	AlamarBlue	AlamarBlue		73.216		19	10.1016/j.jes.2017.10.014
586	2018	PTFE-PMMA	O	Irregular	None	Free Radical Polymerization	Negative		744.7	957.4	-2.2	-8.3	J774A.1	10000	A	Mouse	Ascites	Macrophage	Adult	L	24	400	AlamarBlue	AlamarBlue		42.758		19	10.1016/j.jes.2017.10.014
587	2020	Au	I	Sphere	None	Chemical Reduction		38	44				MG-63	50000	H	Human	Bone	Fibroblast	Adult	L	24	0.2	MTT	TetrazoliumSalt		98.827		20	10.1016/j.jphotobiol.2020.111778
588	2020	Au	I	Sphere	None	Chemical Reduction		38	44				MG-63	50000	H	Human	Bone	Fibroblast	Adult	L	24	0.4	MTT	TetrazoliumSalt		91.134		20	10.1016/j.jphotobiol.2020.111778
589	2020	Au	I	Sphere	None	Chemical Reduction		38	44				MG-63	50000	H	Human	Bone	Fibroblast	Adult	L	24	0.8	MTT	TetrazoliumSalt		79.531		20	10.1016/j.jphotobiol.2020.111778
590	2020	Au	I	Sphere	None	Chemical Reduction		46	48				MG-63	50000	H	Human	Bone	Fibroblast	Adult	L	24	0.2	MTT	TetrazoliumSalt		91.134		20	10.1016/j.jphotobiol.2020.111778
591	2020	Au	I	Sphere	None	Chemical Reduction		46	48				MG-63	50000	H	Human	Bone	Fibroblast	Adult	L	24	0.4	MTT	TetrazoliumSalt		87.223		20	10.1016/j.jphotobiol.2020.111778
592	2020	Au	I	Sphere	None	Chemical Reduction		46	48				MG-63	50000	H	Human	Bone	Fibroblast	Adult	L	24	0.8	MTT	TetrazoliumSalt		47.849		20	10.1016/j.jphotobiol.2020.111778
593	2020	Au	I	Sphere	None	Chemical Reduction		60	64				MG-63	50000	H	Human	Bone	Fibroblast	Adult	L	24	0.2	MTT	TetrazoliumSalt		91.134		20	10.1016/j.jphotobiol.2020.111778
594	2020	Au	I	Sphere	None	Chemical Reduction		60	64				MG-63	50000	H	Human	Bone	Fibroblast	Adult	L	24	0.4	MTT	TetrazoliumSalt		87.353		20	10.1016/j.jphotobiol.2020.111778
595	2020	Au	I	Sphere	None	Chemical Reduction		60	64				MG-63	50000	H	Human	Bone	Fibroblast	Adult	L	24	0.8	MTT	TetrazoliumSalt		56.845		20	10.1016/j.jphotobiol.2020.111778
596	2020	TiO2	I	Lentil	None	Commercial		5					SHSY5Y	160000	H	Human	BoneMarrow	Epithelial	Adult	L	24	5	MTT	TetrazoliumSalt		99.234		21	10.1016/j.jtemb.2019.126413
597	2020	TiO2	I	Lentil	None	Commercial		5					SHSY5Y	160000	H	Human	BoneMarrow	Epithelial	Adult	L	24	10	MTT	TetrazoliumSalt		104.44		21	10.1016/j.jtemb.2019.126413
598	2020	TiO2	I	Lentil	None	Commercial		5					SHSY5Y	160000	H	Human	BoneMarrow	Epithelial	Adult	L	24	50	MTT	TetrazoliumSalt		136.91		21	10.1016/j.jtemb.2019.126413
599	2020	TiO2	I	Lentil	None	Commercial		5					SHSY5Y	160000	H	Human	BoneMarrow	Epithelial	Adult	L	24	100	MTT	TetrazoliumSalt		162.02		21	10.1016/j.jtemb.2019.126413
600	2019	TiO2	I	Sphere	None	Sol-Gel Method	Negative	60	239.1		-51.9		THP-1		H	Human	Blood	Monocyte	Adult	L	24	1	MTT	TetrazoliumSalt		87.472	0.217	22	10.1016/j.procbio.2019.08.004
601	2019	TiO2	I	Sphere	None	Sol-Gel Method	Negative	60	239.1		-51.9		THP-1		H	Human	Blood	Monocyte	Adult	L	24	10	MTT	TetrazoliumSalt		61.197	0.217	22	10.1016/j.procbio.2019.08.004
602	2019	TiO2	I	Sphere	None	Sol-Gel Method	Negative	60	239.1		-51.9		THP-1		H	Human	Blood	Monocyte	Adult	L	24	20	MTT	TetrazoliumSalt		51.774	0.217	22	10.1016/j.procbio.2019.08.004
603	2019	TiO2	I	Sphere	None	Sol-Gel Method	Negative	60	239.1		-51.9		THP-1		H	Human	Blood	Monocyte	Adult	L	24	50	MTT	TetrazoliumSalt		44.9	0.217	22	10.1016/j.procbio.2019.08.004
604	2014	ZnO	I	Sph/Tri/Hex	None	Biosynthesis		75	97.5				Lymphocyte	100000	H	Human	Blood	Lymphoblast	Adult	P	3	125	MTT	TetrazoliumSalt		95.027		23	10.1007/s00449-013-0982-7
605	2014	ZnO	I	Sph/Tri/Hex	None	Biosynthesis		75	97.5				Lymphocyte	100000	H	Human	Blood	Lymphoblast	Adult	P	3	250	MTT	TetrazoliumSalt		106.05		23	10.1007/s00449-013-0982-7
606	2014	ZnO	I	Sph/Tri/Hex	None	Biosynthesis		75	97.5				Lymphocyte	100000	H	Human	Blood	Lymphoblast	Adult	P	3	500	MTT	TetrazoliumSalt		74.757		23	10.1007/s00449-013-0982-7
607	2014	ZnO	I	Sph/Tri/Hex	None	Biosynthesis		75	97.5				Lymphocyte	100000	H	Human	Blood	Lymphoblast	Adult	P	3	1000	MTT	TetrazoliumSalt		49.297		23	10.1007/s00449-013-0982-7
608	2014	ZnO	I	Sph/Tri/Hex	None	Biosynthesis		75	97.5				Lymphocyte	100000	H	Human	Blood	Lymphoblast	Adult	P	3	125	Live/Dead	TrypanBlue		91.304		23	10.1007/s00449-013-0982-7
609	2014	ZnO	I	Sph/Tri/Hex	None	Biosynthesis		75	97.5				Lymphocyte	100000	H	Human	Blood	Lymphoblast	Adult	P	3	250	Live/Dead	TrypanBlue		90.261		23	10.1007/s00449-013-0982-7
610	2014	ZnO	I	Sph/Tri/Hex	None	Biosynthesis		75	97.5				Lymphocyte	100000	H	Human	Blood	Lymphoblast	Adult	P	3	500	Live/Dead	TrypanBlue		78.957		23	10.1007/s00449-013-0982-7
611	2014	ZnO	I	Sph/Tri/Hex	None	Biosynthesis		75	97.5				Lymphocyte	100000	H	Human	Blood	Lymphoblast	Adult	P	3	1000	Live/Dead	TrypanBlue		65.565		23	10.1007/s00449-013-0982-7
612	2014	IronOxide	I	Sphere	PEG	Solvothermal Process		18.4					SKOV-3	100000	H	Human	Ovary	Epithelial	Adult	L	24	0.5	MTT	TetrazoliumSalt		88.907		24	10.1016/j.nano.2014.01.006
613	2014	IronOxide	I	Sphere	PEG	Solvothermal Process		18.4					SKOV-3	100000	H	Human	Ovary	Epithelial	Adult	L	24	1	MTT	TetrazoliumSalt		89.723		24	10.1016/j.nano.2014.01.006
614	2014	IronOxide	I	Sphere	PEG	Solvothermal Process		18.4					SKOV-3	100000	H	Human	Ovary	Epithelial	Adult	L	24	5	MTT	TetrazoliumSalt		93.312		24	10.1016/j.nano.2014.01.006
615	2014	IronOxide	I	Sphere	PEG	Solvothermal Process		18.4					SKOV-3	100000	H	Human	Ovary	Epithelial	Adult	L	24	10	MTT	TetrazoliumSalt		91.517		24	10.1016/j.nano.2014.01.006
616	2014	IronOxide	I	Sphere	PEG	Solvothermal Process		18.4					SKOV-3	100000	H	Human	Ovary	Epithelial	Adult	L	24	50	MTT	TetrazoliumSalt		80.914		24	10.1016/j.nano.2014.01.006
617	2014	IronOxide	I	Sphere	PEG	Solvothermal Process		18.4					SKOV-3	100000	H	Human	Ovary	Epithelial	Adult	L	24	100	MTT	TetrazoliumSalt		74.388		24	10.1016/j.nano.2014.01.006
618	2014	IronOxide	I	Sphere	PEG-FA	Solvothermal Process	Negative		326.5	362.8	-23.5	-9.4	SKOV-3	100000	H	Human	Ovary	Epithelial	Adult	L	24	0.5	MTT	TetrazoliumSalt		88.699	0.8	24	10.1016/j.nano.2014.01.006
619	2014	IronOxide	I	Sphere	PEG-FA	Solvothermal Process	Negative		326.5	362.8	-23.5	-9.4	SKOV-3	100000	H	Human	Ovary	Epithelial	Adult	L	24	1	MTT	TetrazoliumSalt		87.158	0.8	24	10.1016/j.nano.2014.01.006
620	2014	IronOxide	I	Sphere	PEG-FA	Solvothermal Process	Negative		326.5	362.8	-23.5	-9.4	SKOV-3	100000	H	Human	Ovary	Epithelial	Adult	L	24	5	MTT	TetrazoliumSalt		86.473	0.8	24	10.1016/j.nano.2014.01.006
621	2014	IronOxide	I	Sphere	PEG-FA	Solvothermal Process	Negative		326.5	362.8	-23.5	-9.4	SKOV-3	100000	H	Human	Ovary	Epithelial	Adult	L	24	10	MTT	TetrazoliumSalt		90.925	0.8	24	10.1016/j.nano.2014.01.006
622	2014	IronOxide	I	Sphere	PEG-FA	Solvothermal Process	Negative		326.5	362.8	-23.5	-9.4	SKOV-3	100000	H	Human	Ovary	Epithelial	Adult	L	24	50	MTT	TetrazoliumSalt		88.014	0.8	24	10.1016/j.nano.2014.01.006
623	2014	IronOxide	I	Sphere	PEG-FA	Solvothermal Process	Negative		326.5	362.8	-23.5	-9.4	SKOV-3	100000	H	Human	Ovary	Epithelial	Adult	L	24	100	MTT	TetrazoliumSalt		85.616	0.8	24	10.1016/j.nano.2014.01.006
624	2014	IronOxide	I	Sphere	Silica-FA	Solvothermal Process	Negative		274.1	567.3	-27.7	-7.6	SKOV-3	100000	H	Human	Ovary	Epithelial	Adult	L	24	0.5	MTT	TetrazoliumSalt		87.873	0.7	24	10.1016/j.nano.2014.01.006
625	2014	IronOxide	I	Sphere	Silica-FA	Solvothermal Process	Negative		274.1	567.3	-27.7	-7.6	SKOV-3	100000	H	Human	Ovary	Epithelial	Adult	L	24	1	MTT	TetrazoliumSalt		86.455	0.7	24	10.1016/j.nano.2014.01.006
626	2014	IronOxide	I	Sphere	Silica-FA	Solvothermal Process	Negative		274.1	567.3	-27.7	-7.6	SKOV-3	100000	H	Human	Ovary	Epithelial	Adult	L	24	5	MTT	TetrazoliumSalt		83.445	0.7	24	10.1016/j.nano.2014.01.006
627	2014	IronOxide	I	Sphere	Silica-FA	Solvothermal Process	Negative		274.1	567.3	-27.7	-7.6	SKOV-3	100000	H	Human	Ovary	Epithelial	Adult	L	24	10	MTT	TetrazoliumSalt		91.639	0.7	24	10.1016/j.nano.2014.01.006
628	2014	IronOxide	I	Sphere	Silica-FA	Solvothermal Process	Negative		274.1	567.3	-27.7	-7.6	SKOV-3	100000	H	Human	Ovary	Epithelial	Adult	L	24	50	MTT	TetrazoliumSalt		85.786	0.7	24	10.1016/j.nano.2014.01.006
629	2014	IronOxide	I	Sphere	Silica-FA	Solvothermal Process	Negative		274.1	567.3	-27.7	-7.6	SKOV-3	100000	H	Human	Ovary	Epithelial	Adult	L	24	100	MTT	TetrazoliumSalt		84.114	0.7	24	10.1016/j.nano.2014.01.006
630	2014	IronOxide	I	Sphere	PEG	Solvothermal Process		18.4					SKOV-3	100000	H	Human	Ovary	Epithelial	Adult	L	48	0.5	MTT	TetrazoliumSalt		105.22		24	10.1016/j.nano.2014.01.006
631	2014	IronOxide	I	Sphere	PEG	Solvothermal Process		18.4					SKOV-3	100000	H	Human	Ovary	Epithelial	Adult	L	48	1	MTT	TetrazoliumSalt		96.9		24	10.1016/j.nano.2014.01.006
632	2014	IronOxide	I	Sphere	PEG	Solvothermal Process		18.4					SKOV-3	100000	H	Human	Ovary	Epithelial	Adult	L	48	5	MTT	TetrazoliumSalt		94.29		24	10.1016/j.nano.2014.01.006
633	2014	IronOxide	I	Sphere	PEG	Solvothermal Process		18.4					SKOV-3	100000	H	Human	Ovary	Epithelial	Adult	L	48	10	MTT	TetrazoliumSalt		89.886		24	10.1016/j.nano.2014.01.006
634	2014	IronOxide	I	Sphere	PEG	Solvothermal Process		18.4					SKOV-3	100000	H	Human	Ovary	Epithelial	Adult	L	48	50	MTT	TetrazoliumSalt		86.949		24	10.1016/j.nano.2014.01.006
635	2014	IronOxide	I	Sphere	PEG	Solvothermal Process		18.4					SKOV-3	100000	H	Human	Ovary	Epithelial	Adult	L	48	100	MTT	TetrazoliumSalt		82.545		24	10.1016/j.nano.2014.01.006
636	2014	IronOxide	I	Sphere	PEG-FA	Solvothermal Process	Negative		326.5	362.8	-23.5	-9.4	SKOV-3	100000	H	Human	Ovary	Epithelial	Adult	L	48	0.5	MTT	TetrazoliumSalt		98.288	0.8	24	10.1016/j.nano.2014.01.006
637	2014	IronOxide	I	Sphere	PEG-FA	Solvothermal Process	Negative		326.5	362.8	-23.5	-9.4	SKOV-3	100000	H	Human	Ovary	Epithelial	Adult	L	48	1	MTT	TetrazoliumSalt		99.144	0.8	24	10.1016/j.nano.2014.01.006
638	2014	IronOxide	I	Sphere	PEG-FA	Solvothermal Process	Negative		326.5	362.8	-23.5	-9.4	SKOV-3	100000	H	Human	Ovary	Epithelial	Adult	L	48	5	MTT	TetrazoliumSalt		93.151	0.8	24	10.1016/j.nano.2014.01.006
639	2014	IronOxide	I	Sphere	PEG-FA	Solvothermal Process	Negative		326.5	362.8	-23.5	-9.4	SKOV-3	100000	H	Human	Ovary	Epithelial	Adult	L	48	10	MTT	TetrazoliumSalt		92.979	0.8	24	10.1016/j.nano.2014.01.006
640	2014	IronOxide	I	Sphere	PEG-FA	Solvothermal Process	Negative		326.5	362.8	-23.5	-9.4	SKOV-3	100000	H	Human	Ovary	Epithelial	Adult	L	48	50	MTT	TetrazoliumSalt		88.87	0.8	24	10.1016/j.nano.2014.01.006
641	2014	IronOxide	I	Sphere	PEG-FA	Solvothermal Process	Negative		326.5	362.8	-23.5	-9.4	SKOV-3	100000	H	Human	Ovary	Epithelial	Adult	L	48	100	MTT	TetrazoliumSalt		86.473	0.8	24	10.1016/j.nano.2014.01.006
642	2014	IronOxide	I	Sphere	Silica-FA	Solvothermal Process	Negative		274.1	567.3	-27.7	-7.6	SKOV-3	100000	H	Human	Ovary	Epithelial	Adult	L	48	0.5	MTT	TetrazoliumSalt		93.144	0.7	24	10.1016/j.nano.2014.01.006
643	2014	IronOxide	I	Sphere	Silica-FA	Solvothermal Process	Negative		274.1	567.3	-27.7	-7.6	SKOV-3	100000	H	Human	Ovary	Epithelial	Adult	L	48	1	MTT	TetrazoliumSalt		87.793	0.7	24	10.1016/j.nano.2014.01.006
644	2014	IronOxide	I	Sphere	Silica-FA	Solvothermal Process	Negative		274.1	567.3	-27.7	-7.6	SKOV-3	100000	H	Human	Ovary	Epithelial	Adult	L	48	5	MTT	TetrazoliumSalt		88.629	0.7	24	10.1016/j.nano.2014.01.006
645	2014	IronOxide	I	Sphere	Silica-FA	Solvothermal Process	Negative		274.1	567.3	-27.7	-7.6	SKOV-3	100000	H	Human	Ovary	Epithelial	Adult	L	48	10	MTT	TetrazoliumSalt		90.301	0.7	24	10.1016/j.nano.2014.01.006
646	2014	IronOxide	I	Sphere	Silica-FA	Solvothermal Process	Negative		274.1	567.3	-27.7	-7.6	SKOV-3	100000	H	Human	Ovary	Epithelial	Adult	L	48	50	MTT	TetrazoliumSalt		85.786	0.7	24	10.1016/j.nano.2014.01.006
647	2014	IronOxide	I	Sphere	Silica-FA	Solvothermal Process	Negative		274.1	567.3	-27.7	-7.6	SKOV-3	100000	H	Human	Ovary	Epithelial	Adult	L	48	100	MTT	TetrazoliumSalt		83.445	0.7	24	10.1016/j.nano.2014.01.006
648	2014	IronOxide	I	Sphere	PEG-FA	Solvothermal Process	Negative		326.5	362.8	-23.5	-9.4	SKOV-3	100000	H	Human	Ovary	Epithelial	Adult	L	24	0.5	LDH	LDHrelease		96.743	0.8	24	10.1016/j.nano.2014.01.006
649	2014	IronOxide	I	Sphere	PEG-FA	Solvothermal Process	Negative		326.5	362.8	-23.5	-9.4	SKOV-3	100000	H	Human	Ovary	Epithelial	Adult	L	24	1	LDH	LDHrelease		83.225	0.8	24	10.1016/j.nano.2014.01.006
650	2014	IronOxide	I	Sphere	PEG-FA	Solvothermal Process	Negative		326.5	362.8	-23.5	-9.4	SKOV-3	100000	H	Human	Ovary	Epithelial	Adult	L	24	5	LDH	LDHrelease		82.573	0.8	24	10.1016/j.nano.2014.01.006
651	2014	IronOxide	I	Sphere	PEG-FA	Solvothermal Process	Negative		326.5	362.8	-23.5	-9.4	SKOV-3	100000	H	Human	Ovary	Epithelial	Adult	L	24	10	LDH	LDHrelease		80.945	0.8	24	10.1016/j.nano.2014.01.006
652	2014	IronOxide	I	Sphere	PEG-FA	Solvothermal Process	Negative		326.5	362.8	-23.5	-9.4	SKOV-3	100000	H	Human	Ovary	Epithelial	Adult	L	24	50	LDH	LDHrelease		80.945	0.8	24	10.1016/j.nano.2014.01.006
653	2014	IronOxide	I	Sphere	PEG-FA	Solvothermal Process	Negative		326.5	362.8	-23.5	-9.4	SKOV-3	100000	H	Human	Ovary	Epithelial	Adult	L	24	100	LDH	LDHrelease		79.316	0.8	24	10.1016/j.nano.2014.01.006
654	2014	IronOxide	I	Sphere	Silica-FA	Solvothermal Process	Negative		274.1	567.3	-27.7	-7.6	SKOV-3	100000	H	Human	Ovary	Epithelial	Adult	L	24	0.5	LDH	LDHrelease		96.743	0.7	24	10.1016/j.nano.2014.01.006
655	2014	IronOxide	I	Sphere	Silica-FA	Solvothermal Process	Negative		274.1	567.3	-27.7	-7.6	SKOV-3	100000	H	Human	Ovary	Epithelial	Adult	L	24	1	LDH	LDHrelease		82.573	0.7	24	10.1016/j.nano.2014.01.006
656	2014	IronOxide	I	Sphere	Silica-FA	Solvothermal Process	Negative		274.1	567.3	-27.7	-7.6	SKOV-3	100000	H	Human	Ovary	Epithelial	Adult	L	24	5	LDH	LDHrelease		76.873	0.7	24	10.1016/j.nano.2014.01.006
657	2014	IronOxide	I	Sphere	Silica-FA	Solvothermal Process	Negative		274.1	567.3	-27.7	-7.6	SKOV-3	100000	H	Human	Ovary	Epithelial	Adult	L	24	10	LDH	LDHrelease		76.873	0.7	24	10.1016/j.nano.2014.01.006
658	2014	IronOxide	I	Sphere	Silica-FA	Solvothermal Process	Negative		274.1	567.3	-27.7	-7.6	SKOV-3	100000	H	Human	Ovary	Epithelial	Adult	L	24	50	LDH	LDHrelease		91.205	0.7	24	10.1016/j.nano.2014.01.006
659	2014	IronOxide	I	Sphere	Silica-FA	Solvothermal Process	Negative		274.1	567.3	-27.7	-7.6	SKOV-3	100000	H	Human	Ovary	Epithelial	Adult	L	24	100	LDH	LDHrelease		91.205	0.7	24	10.1016/j.nano.2014.01.006
660	2014	Au	I	Rod	None	Commercial							NIH3T3	3000	A	Mouse	Embryo	Fibroblast	Embryonic	L	72	0.036	MTS	TetrazoliumSalt		80.385		25	10.1016/j.jhazmat.2013.11.031
661	2014	Au	I	Rod	None	Commercial							NIH3T3	3000	A	Mouse	Embryo	Fibroblast	Embryonic	L	72	0.072	MTS	TetrazoliumSalt		72.957		25	10.1016/j.jhazmat.2013.11.031
662	2014	Au	I	Rod	None	Commercial							NIH3T3	3000	A	Mouse	Embryo	Fibroblast	Embryonic	L	72	0.18	MTS	TetrazoliumSalt		56.616		25	10.1016/j.jhazmat.2013.11.031
663	2014	Au	I	Rod	None	Commercial							NIH3T3	3000	A	Mouse	Embryo	Fibroblast	Embryonic	L	72	0.36	MTS	TetrazoliumSalt		49.684		25	10.1016/j.jhazmat.2013.11.031
664	2014	Au	I	Rod	None	Commercial							NIH3T3	3000	A	Mouse	Embryo	Fibroblast	Embryonic	L	72	0.72	MTS	TetrazoliumSalt		42.256		25	10.1016/j.jhazmat.2013.11.031
665	2014	Au	I	Rod	None	Commercial							NIH3T3	3000	A	Mouse	Embryo	Fibroblast	Embryonic	L	72	1	MTS	TetrazoliumSalt		42.586		25	10.1016/j.jhazmat.2013.11.031
666	2014	Au	I	Rod	None	Commercial							PK-15	3000	A	Porcine	Kidney	Epithelial	Adult	L	72	0.036	MTS	TetrazoliumSalt		108.98		25	10.1016/j.jhazmat.2013.11.031
667	2014	Au	I	Rod	None	Commercial							PK-15	3000	A	Porcine	Kidney	Epithelial	Adult	L	72	0.072	MTS	TetrazoliumSalt		106.23		25	10.1016/j.jhazmat.2013.11.031
668	2014	Au	I	Rod	None	Commercial							PK-15	3000	A	Porcine	Kidney	Epithelial	Adult	L	72	0.18	MTS	TetrazoliumSalt		102.5		25	10.1016/j.jhazmat.2013.11.031
669	2014	Au	I	Rod	None	Commercial							PK-15	3000	A	Porcine	Kidney	Epithelial	Adult	L	72	0.36	MTS	TetrazoliumSalt		90.126		25	10.1016/j.jhazmat.2013.11.031
670	2014	Au	I	Rod	None	Commercial							PK-15	3000	A	Porcine	Kidney	Epithelial	Adult	L	72	0.72	MTS	TetrazoliumSalt		63.619		25	10.1016/j.jhazmat.2013.11.031
671	2014	Au	I	Rod	None	Commercial							PK-15	3000	A	Porcine	Kidney	Epithelial	Adult	L	72	1	MTS	TetrazoliumSalt		47.518		25	10.1016/j.jhazmat.2013.11.031
672	2014	Au	I	Rod	None	Commercial							VERO	3000	A	Monkey	Kidney	Epithelial	Adult	L	72	0.036	MTS	TetrazoliumSalt		101.35		25	10.1016/j.jhazmat.2013.11.031
673	2014	Au	I	Rod	None	Commercial							VERO	3000	A	Monkey	Kidney	Epithelial	Adult	L	72	0.072	MTS	TetrazoliumSalt		91.689		25	10.1016/j.jhazmat.2013.11.031
674	2014	Au	I	Rod	None	Commercial							VERO	3000	A	Monkey	Kidney	Epithelial	Adult	L	72	0.18	MTS	TetrazoliumSalt		67.636		25	10.1016/j.jhazmat.2013.11.031
675	2014	Au	I	Rod	None	Commercial							VERO	3000	A	Monkey	Kidney	Epithelial	Adult	L	72	0.36	MTS	TetrazoliumSalt		41.527		25	10.1016/j.jhazmat.2013.11.031
676	2014	Au	I	Rod	None	Commercial							VERO	3000	A	Monkey	Kidney	Epithelial	Adult	L	72	0.72	MTS	TetrazoliumSalt		27.959		25	10.1016/j.jhazmat.2013.11.031
677	2014	Au	I	Rod	None	Commercial							VERO	3000	A	Monkey	Kidney	Epithelial	Adult	L	72	1	MTS	TetrazoliumSalt		28.37		25	10.1016/j.jhazmat.2013.11.031
678	2013	SiO2	I	Sphere	None	Commercial	Negative	15	128	96	-25	-28	A431	10000	H	Human	Skin	Epithelial	Adult	L	72	25	MTT	TetrazoliumSalt		88.973		26	10.1177/0960327112459206
679	2013	SiO2	I	Sphere	None	Commercial	Negative	15	128	96	-25	-28	A431	10000	H	Human	Skin	Epithelial	Adult	L	72	50	MTT	TetrazoliumSalt		76.933		26	10.1177/0960327112459206
680	2013	SiO2	I	Sphere	None	Commercial	Negative	15	128	96	-25	-28	A431	10000	H	Human	Skin	Epithelial	Adult	L	72	100	MTT	TetrazoliumSalt		59.949		26	10.1177/0960327112459206
681	2013	SiO2	I	Sphere	None	Commercial	Negative	15	128	96	-25	-28	A431	10000	H	Human	Skin	Epithelial	Adult	L	72	200	MTT	TetrazoliumSalt		48.923		26	10.1177/0960327112459206
682	2013	SiO2	I	Sphere	None	Commercial	Negative	15	128	96	-25	-28	A549	10000	H	Human	Lung	Epithelial	Adult	L	72	25	MTT	TetrazoliumSalt		87.072		26	10.1177/0960327112459206
683	2013	SiO2	I	Sphere	None	Commercial	Negative	15	128	96	-25	-28	A549	10000	H	Human	Lung	Epithelial	Adult	L	72	50	MTT	TetrazoliumSalt		74.018		26	10.1177/0960327112459206
684	2013	SiO2	I	Sphere	None	Commercial	Negative	15	128	96	-25	-28	A549	10000	H	Human	Lung	Epithelial	Adult	L	72	100	MTT	TetrazoliumSalt		58.048		26	10.1177/0960327112459206
685	2013	SiO2	I	Sphere	None	Commercial	Negative	15	128	96	-25	-28	A549	10000	H	Human	Lung	Epithelial	Adult	L	72	200	MTT	TetrazoliumSalt		44.994		26	10.1177/0960327112459206
686	2012	SiO2	I	Sphere	None	Commercial	Negative	14.23	128	96	-25	-28	HepG2	10000	H	Human	Liver	Epithelial	Adult	L	72	1	MTT	TetrazoliumSalt		96.842		27	10.1016/j.taap.2011.12.020
687	2012	SiO2	I	Sphere	None	Commercial	Negative	14.23	128	96	-25	-28	HepG2	10000	H	Human	Liver	Epithelial	Adult	L	72	5	MTT	TetrazoliumSalt		95		27	10.1016/j.taap.2011.12.020
688	2012	SiO2	I	Sphere	None	Commercial	Negative	14.23	128	96	-25	-28	HepG2	10000	H	Human	Liver	Epithelial	Adult	L	72	10	MTT	TetrazoliumSalt		91.184		27	10.1016/j.taap.2011.12.020
689	2012	SiO2	I	Sphere	None	Commercial	Negative	14.23	128	96	-25	-28	HepG2	10000	H	Human	Liver	Epithelial	Adult	L	72	25	MTT	TetrazoliumSalt		79.342		27	10.1016/j.taap.2011.12.020
690	2012	SiO2	I	Sphere	None	Commercial	Negative	14.23	128	96	-25	-28	HepG2	10000	H	Human	Liver	Epithelial	Adult	L	72	50	MTT	TetrazoliumSalt		71.316		27	10.1016/j.taap.2011.12.020
691	2012	SiO2	I	Sphere	None	Commercial	Negative	14.23	128	96	-25	-28	HepG2	10000	H	Human	Liver	Epithelial	Adult	L	72	100	MTT	TetrazoliumSalt		63.816		27	10.1016/j.taap.2011.12.020
692	2012	SiO2	I	Sphere	None	Commercial	Negative	14.23	128	96	-25	-28	HepG2	10000	H	Human	Liver	Epithelial	Adult	L	72	200	MTT	TetrazoliumSalt		55.263		27	10.1016/j.taap.2011.12.020
693	2012	SiO2	I	Sphere	None	Commercial	Negative	14.23	128	96	-25	-28	HepG2	10000	H	Human	Liver	Epithelial	Adult	L	72	1	NRU	NeutralRed		96.708		27	10.1016/j.taap.2011.12.020
694	2012	SiO2	I	Sphere	None	Commercial	Negative	14.23	128	96	-25	-28	HepG2	10000	H	Human	Liver	Epithelial	Adult	L	72	5	NRU	NeutralRed		95.61		27	10.1016/j.taap.2011.12.020
695	2012	SiO2	I	Sphere	None	Commercial	Negative	14.23	128	96	-25	-28	HepG2	10000	H	Human	Liver	Epithelial	Adult	L	72	10	NRU	NeutralRed		92.455		27	10.1016/j.taap.2011.12.020
696	2012	SiO2	I	Sphere	None	Commercial	Negative	14.23	128	96	-25	-28	HepG2	10000	H	Human	Liver	Epithelial	Adult	L	72	25	NRU	NeutralRed		78.326		27	10.1016/j.taap.2011.12.020
697	2012	SiO2	I	Sphere	None	Commercial	Negative	14.23	128	96	-25	-28	HepG2	10000	H	Human	Liver	Epithelial	Adult	L	72	50	NRU	NeutralRed		71.605		27	10.1016/j.taap.2011.12.020
698	2012	SiO2	I	Sphere	None	Commercial	Negative	14.23	128	96	-25	-28	HepG2	10000	H	Human	Liver	Epithelial	Adult	L	72	100	NRU	NeutralRed		65.021		27	10.1016/j.taap.2011.12.020
699	2012	SiO2	I	Sphere	None	Commercial	Negative	14.23	128	96	-25	-28	HepG2	10000	H	Human	Liver	Epithelial	Adult	L	72	200	NRU	NeutralRed		58.848		27	10.1016/j.taap.2011.12.020
700	2019	SiO2	I	Sphere	None	Hydrolysis	Negative		289.76		-28		Caco-2	5000	H	Human	Colon	Epithelial	Adult	L	24	50	AlamarBlue	AlamarBlue		91.683	0.25	28	10.3390/nano9081081
701	2019	SiO2	I	Sphere	None	Hydrolysis	Negative		289.76		-28		Caco-2	5000	H	Human	Colon	Epithelial	Adult	L	24	100	AlamarBlue	AlamarBlue		117.41	0.25	28	10.3390/nano9081081
702	2019	SiO2	I	Sphere	None	Hydrolysis	Negative		289.76		-28		Caco-2	5000	H	Human	Colon	Epithelial	Adult	L	24	200	AlamarBlue	AlamarBlue		113.35	0.25	28	10.3390/nano9081081
703	2019	SiO2	I	Sphere	None	Hydrolysis	Negative		289.76		-28		Caco-2	5000	H	Human	Colon	Epithelial	Adult	L	24	500	AlamarBlue	AlamarBlue		128.05	0.25	28	10.3390/nano9081081
704	2019	SiO2	I	Sphere	Chitosan	Hydrolysis	Positive		578.27		8		Caco-2	5000	H	Human	Colon	Epithelial	Adult	L	24	50	AlamarBlue	AlamarBlue		94.523	0.32	28	10.3390/nano9081081
705	2019	SiO2	I	Sphere	Chitosan	Hydrolysis	Positive		578.27		8		Caco-2	5000	H	Human	Colon	Epithelial	Adult	L	24	100	AlamarBlue	AlamarBlue		69.258	0.32	28	10.3390/nano9081081
706	2019	SiO2	I	Sphere	Chitosan	Hydrolysis	Positive		578.27		8		Caco-2	5000	H	Human	Colon	Epithelial	Adult	L	24	200	AlamarBlue	AlamarBlue		42.933	0.32	28	10.3390/nano9081081
707	2019	SiO2	I	Sphere	Chitosan	Hydrolysis	Positive		578.27		8		Caco-2	5000	H	Human	Colon	Epithelial	Adult	L	24	500	AlamarBlue	AlamarBlue		40.636	0.32	28	10.3390/nano9081081
708	2019	SiO2	I	Sphere	SodiumAlginate	Hydrolysis	Negative		345.2		-13		Caco-2	5000	H	Human	Colon	Epithelial	Adult	L	24	50	AlamarBlue	AlamarBlue		88.508	0.37	28	10.3390/nano9081081
709	2019	SiO2	I	Sphere	SodiumAlginate	Hydrolysis	Negative		345.2		-13		Caco-2	5000	H	Human	Colon	Epithelial	Adult	L	24	100	AlamarBlue	AlamarBlue		36.878	0.37	28	10.3390/nano9081081
710	2019	SiO2	I	Sphere	SodiumAlginate	Hydrolysis	Negative		345.2		-13		Caco-2	5000	H	Human	Colon	Epithelial	Adult	L	24	200	AlamarBlue	AlamarBlue		34.305	0.37	28	10.3390/nano9081081
711	2019	SiO2	I	Sphere	SodiumAlginate	Hydrolysis	Negative		345.2		-13		Caco-2	5000	H	Human	Colon	Epithelial	Adult	L	24	500	AlamarBlue	AlamarBlue		28.473	0.37	28	10.3390/nano9081081
712	2019	SiO2	I	Sphere	None	Hydrolysis	Negative		289.76		-28		Caco-2	5000	H	Human	Colon	Epithelial	Adult	L	48	50	AlamarBlue	AlamarBlue		97.485	0.25	28	10.3390/nano9081081
713	2019	SiO2	I	Sphere	None	Hydrolysis	Negative		289.76		-28		Caco-2	5000	H	Human	Colon	Epithelial	Adult	L	48	100	AlamarBlue	AlamarBlue		110.44	0.25	28	10.3390/nano9081081
714	2019	SiO2	I	Sphere	None	Hydrolysis	Negative		289.76		-28		Caco-2	5000	H	Human	Colon	Epithelial	Adult	L	48	200	AlamarBlue	AlamarBlue		108.12	0.25	28	10.3390/nano9081081
715	2019	SiO2	I	Sphere	None	Hydrolysis	Negative		289.76		-28		Caco-2	5000	H	Human	Colon	Epithelial	Adult	L	48	500	AlamarBlue	AlamarBlue		107.74	0.25	28	10.3390/nano9081081
716	2019	SiO2	I	Sphere	Chitosan	Hydrolysis	Positive		578.27		8		Caco-2	5000	H	Human	Colon	Epithelial	Adult	L	48	50	AlamarBlue	AlamarBlue		96.82	0.32	28	10.3390/nano9081081
717	2019	SiO2	I	Sphere	Chitosan	Hydrolysis	Positive		578.27		8		Caco-2	5000	H	Human	Colon	Epithelial	Adult	L	48	100	AlamarBlue	AlamarBlue		93.64	0.32	28	10.3390/nano9081081
718	2019	SiO2	I	Sphere	Chitosan	Hydrolysis	Positive		578.27		8		Caco-2	5000	H	Human	Colon	Epithelial	Adult	L	48	200	AlamarBlue	AlamarBlue		82.862	0.32	28	10.3390/nano9081081
719	2019	SiO2	I	Sphere	Chitosan	Hydrolysis	Positive		578.27		8		Caco-2	5000	H	Human	Colon	Epithelial	Adult	L	48	500	AlamarBlue	AlamarBlue		76.678	0.32	28	10.3390/nano9081081
720	2019	SiO2	I	Sphere	SodiumAlginate	Hydrolysis	Negative		345.2		-13		Caco-2	5000	H	Human	Colon	Epithelial	Adult	L	48	50	AlamarBlue	AlamarBlue		98.113	0.37	28	10.3390/nano9081081
721	2019	SiO2	I	Sphere	SodiumAlginate	Hydrolysis	Negative		345.2		-13		Caco-2	5000	H	Human	Colon	Epithelial	Adult	L	48	100	AlamarBlue	AlamarBlue		81.475	0.37	28	10.3390/nano9081081
722	2019	SiO2	I	Sphere	SodiumAlginate	Hydrolysis	Negative		345.2		-13		Caco-2	5000	H	Human	Colon	Epithelial	Adult	L	48	200	AlamarBlue	AlamarBlue		82.676	0.37	28	10.3390/nano9081081
723	2019	SiO2	I	Sphere	SodiumAlginate	Hydrolysis	Negative		345.2		-13		Caco-2	5000	H	Human	Colon	Epithelial	Adult	L	48	500	AlamarBlue	AlamarBlue		79.417	0.37	28	10.3390/nano9081081
724	2019	SiO2	I	Sphere	None	Hydrolysis	Negative		289.76		-28		HepG2	5000	H	Human	Liver	Epithelial	Adult	L	24	50	AlamarBlue	AlamarBlue		88.516	0.25	28	10.3390/nano9081081
725	2019	SiO2	I	Sphere	None	Hydrolysis	Negative		289.76		-28		HepG2	5000	H	Human	Liver	Epithelial	Adult	L	24	100	AlamarBlue	AlamarBlue		83.569	0.25	28	10.3390/nano9081081
726	2019	SiO2	I	Sphere	None	Hydrolysis	Negative		289.76		-28		HepG2	5000	H	Human	Liver	Epithelial	Adult	L	24	200	AlamarBlue	AlamarBlue		81.625	0.25	28	10.3390/nano9081081
727	2019	SiO2	I	Sphere	None	Hydrolysis	Negative		289.76		-28		HepG2	5000	H	Human	Liver	Epithelial	Adult	L	24	500	AlamarBlue	AlamarBlue		93.11	0.25	28	10.3390/nano9081081
728	2019	SiO2	I	Sphere	Chitosan	Hydrolysis	Positive		578.27		8		HepG2	5000	H	Human	Liver	Epithelial	Adult	L	24	50	AlamarBlue	AlamarBlue		99.824	0.32	28	10.3390/nano9081081
729	2019	SiO2	I	Sphere	Chitosan	Hydrolysis	Positive		578.27		8		HepG2	5000	H	Human	Liver	Epithelial	Adult	L	24	100	AlamarBlue	AlamarBlue		63.269	0.32	28	10.3390/nano9081081
730	2019	SiO2	I	Sphere	Chitosan	Hydrolysis	Positive		578.27		8		HepG2	5000	H	Human	Liver	Epithelial	Adult	L	24	200	AlamarBlue	AlamarBlue		52.9	0.32	28	10.3390/nano9081081
731	2019	SiO2	I	Sphere	Chitosan	Hydrolysis	Positive		578.27		8		HepG2	5000	H	Human	Liver	Epithelial	Adult	L	24	500	AlamarBlue	AlamarBlue		78.383	0.32	28	10.3390/nano9081081
732	2019	SiO2	I	Sphere	SodiumAlginate	Hydrolysis	Negative		345.2		-13		HepG2	5000	H	Human	Liver	Epithelial	Adult	L	24	50	AlamarBlue	AlamarBlue		103.09	0.37	28	10.3390/nano9081081
733	2019	SiO2	I	Sphere	SodiumAlginate	Hydrolysis	Negative		345.2		-13		HepG2	5000	H	Human	Liver	Epithelial	Adult	L	24	100	AlamarBlue	AlamarBlue		86.942	0.37	28	10.3390/nano9081081
734	2019	SiO2	I	Sphere	SodiumAlginate	Hydrolysis	Negative		345.2		-13		HepG2	5000	H	Human	Liver	Epithelial	Adult	L	24	200	AlamarBlue	AlamarBlue		90.722	0.37	28	10.3390/nano9081081
735	2019	SiO2	I	Sphere	SodiumAlginate	Hydrolysis	Negative		345.2		-13		HepG2	5000	H	Human	Liver	Epithelial	Adult	L	24	500	AlamarBlue	AlamarBlue		77.32	0.37	28	10.3390/nano9081081
736	2019	SiO2	I	Sphere	None	Hydrolysis	Negative		289.76		-28		HepG2	5000	H	Human	Liver	Epithelial	Adult	L	48	50	AlamarBlue	AlamarBlue		92.403	0.25	28	10.3390/nano9081081
737	2019	SiO2	I	Sphere	None	Hydrolysis	Negative		289.76		-28		HepG2	5000	H	Human	Liver	Epithelial	Adult	L	48	100	AlamarBlue	AlamarBlue		98.057	0.25	28	10.3390/nano9081081
738	2019	SiO2	I	Sphere	None	Hydrolysis	Negative		289.76		-28		HepG2	5000	H	Human	Liver	Epithelial	Adult	L	48	200	AlamarBlue	AlamarBlue		101.59	0.25	28	10.3390/nano9081081
739	2019	SiO2	I	Sphere	None	Hydrolysis	Negative		289.76		-28		HepG2	5000	H	Human	Liver	Epithelial	Adult	L	48	500	AlamarBlue	AlamarBlue		100.35	0.25	28	10.3390/nano9081081
740	2019	SiO2	I	Sphere	Chitosan	Hydrolysis	Positive		578.27		8		HepG2	5000	H	Human	Liver	Epithelial	Adult	L	48	50	AlamarBlue	AlamarBlue		99.473	0.32	28	10.3390/nano9081081
741	2019	SiO2	I	Sphere	Chitosan	Hydrolysis	Positive		578.27		8		HepG2	5000	H	Human	Liver	Epithelial	Adult	L	48	100	AlamarBlue	AlamarBlue		89.455	0.32	28	10.3390/nano9081081
742	2019	SiO2	I	Sphere	Chitosan	Hydrolysis	Positive		578.27		8		HepG2	5000	H	Human	Liver	Epithelial	Adult	L	48	200	AlamarBlue	AlamarBlue		85.764	0.32	28	10.3390/nano9081081
743	2019	SiO2	I	Sphere	Chitosan	Hydrolysis	Positive		578.27		8		HepG2	5000	H	Human	Liver	Epithelial	Adult	L	48	500	AlamarBlue	AlamarBlue		92.794	0.32	28	10.3390/nano9081081
744	2019	SiO2	I	Sphere	SodiumAlginate	Hydrolysis	Negative		345.2		-13		HepG2	5000	H	Human	Liver	Epithelial	Adult	L	48	50	AlamarBlue	AlamarBlue		97.938	0.37	28	10.3390/nano9081081
745	2019	SiO2	I	Sphere	SodiumAlginate	Hydrolysis	Negative		345.2		-13		HepG2	5000	H	Human	Liver	Epithelial	Adult	L	48	100	AlamarBlue	AlamarBlue		95.876	0.37	28	10.3390/nano9081081
746	2019	SiO2	I	Sphere	SodiumAlginate	Hydrolysis	Negative		345.2		-13		HepG2	5000	H	Human	Liver	Epithelial	Adult	L	48	200	AlamarBlue	AlamarBlue		95.361	0.37	28	10.3390/nano9081081
747	2019	SiO2	I	Sphere	SodiumAlginate	Hydrolysis	Negative		345.2		-13		HepG2	5000	H	Human	Liver	Epithelial	Adult	L	48	500	AlamarBlue	AlamarBlue		90.893	0.37	28	10.3390/nano9081081
748	2015	SiO2	I	Sphere	None	Sol-Gel Method	Negative	21.06	37.82		-24.5		A549	50000	H	Human	Lung	Epithelial	Adult	L	24	10	MTT	TetrazoliumSalt		76.923		29	10.1016/j.nano.2015.03.004
749	2015	SiO2	I	Sphere	None	Sol-Gel Method	Negative	21.06	37.82		-24.5		A549	50000	H	Human	Lung	Epithelial	Adult	L	24	50	MTT	TetrazoliumSalt		67.494		29	10.1016/j.nano.2015.03.004
750	2015	SiO2	I	Sphere	None	Sol-Gel Method	Negative	21.06	37.82		-24.5		A549	50000	H	Human	Lung	Epithelial	Adult	L	24	100	MTT	TetrazoliumSalt		61.29		29	10.1016/j.nano.2015.03.004
751	2015	SiO2	I	Sphere	None	Sol-Gel Method	Negative	21.06	37.82		-24.5		A549	50000	H	Human	Lung	Epithelial	Adult	L	24	200	MTT	TetrazoliumSalt		62.283		29	10.1016/j.nano.2015.03.004
752	2015	SiO2	I	Sphere	None	Sol-Gel Method	Negative	21.06	37.82		-24.5		A549	50000	H	Human	Lung	Epithelial	Adult	L	24	500	MTT	TetrazoliumSalt		63.275		29	10.1016/j.nano.2015.03.004
753	2015	SiO2	I	Sphere	None	Sol-Gel Method	Negative	59.72	70.12		-38.1		A549	50000	H	Human	Lung	Epithelial	Adult	L	24	10	MTT	TetrazoliumSalt		100.99		29	10.1016/j.nano.2015.03.004
754	2015	SiO2	I	Sphere	None	Sol-Gel Method	Negative	59.72	70.12		-38.1		A549	50000	H	Human	Lung	Epithelial	Adult	L	24	50	MTT	TetrazoliumSalt		72.705		29	10.1016/j.nano.2015.03.004
755	2015	SiO2	I	Sphere	None	Sol-Gel Method	Negative	59.72	70.12		-38.1		A549	50000	H	Human	Lung	Epithelial	Adult	L	24	100	MTT	TetrazoliumSalt		70.471		29	10.1016/j.nano.2015.03.004
756	2015	SiO2	I	Sphere	None	Sol-Gel Method	Negative	59.72	70.12		-38.1		A549	50000	H	Human	Lung	Epithelial	Adult	L	24	200	MTT	TetrazoliumSalt		64.02		29	10.1016/j.nano.2015.03.004
757	2015	SiO2	I	Sphere	None	Sol-Gel Method	Negative	59.72	70.12		-38.1		A549	50000	H	Human	Lung	Epithelial	Adult	L	24	500	MTT	TetrazoliumSalt		62.283		29	10.1016/j.nano.2015.03.004
758	2015	SiO2	I	Sphere	None	Sol-Gel Method	Negative	100.33	105.5		-31.7		A549	50000	H	Human	Lung	Epithelial	Adult	L	24	10	MTT	TetrazoliumSalt		89.826		29	10.1016/j.nano.2015.03.004
759	2015	SiO2	I	Sphere	None	Sol-Gel Method	Negative	100.33	105.5		-31.7		A549	50000	H	Human	Lung	Epithelial	Adult	L	24	50	MTT	TetrazoliumSalt		70.471		29	10.1016/j.nano.2015.03.004
760	2015	SiO2	I	Sphere	None	Sol-Gel Method	Negative	100.33	105.5		-31.7		A549	50000	H	Human	Lung	Epithelial	Adult	L	24	100	MTT	TetrazoliumSalt		71.464		29	10.1016/j.nano.2015.03.004
761	2015	SiO2	I	Sphere	None	Sol-Gel Method	Negative	100.33	105.5		-31.7		A549	50000	H	Human	Lung	Epithelial	Adult	L	24	200	MTT	TetrazoliumSalt		65.757		29	10.1016/j.nano.2015.03.004
762	2015	SiO2	I	Sphere	None	Sol-Gel Method	Negative	100.33	105.5		-31.7		A549	50000	H	Human	Lung	Epithelial	Adult	L	24	500	MTT	TetrazoliumSalt		72.705		29	10.1016/j.nano.2015.03.004
763	2015	SiO2	I	Sphere	None	Sol-Gel Method	Negative	199.89	203.3		-36.3		A549	50000	H	Human	Lung	Epithelial	Adult	L	24	10	MTT	TetrazoliumSalt		75.186		29	10.1016/j.nano.2015.03.004
764	2015	SiO2	I	Sphere	None	Sol-Gel Method	Negative	199.89	203.3		-36.3		A549	50000	H	Human	Lung	Epithelial	Adult	L	24	50	MTT	TetrazoliumSalt		63.027		29	10.1016/j.nano.2015.03.004
765	2015	SiO2	I	Sphere	None	Sol-Gel Method	Negative	199.89	203.3		-36.3		A549	50000	H	Human	Lung	Epithelial	Adult	L	24	100	MTT	TetrazoliumSalt		62.283		29	10.1016/j.nano.2015.03.004
766	2015	SiO2	I	Sphere	None	Sol-Gel Method	Negative	199.89	203.3		-36.3		A549	50000	H	Human	Lung	Epithelial	Adult	L	24	200	MTT	TetrazoliumSalt		62.779		29	10.1016/j.nano.2015.03.004
767	2015	SiO2	I	Sphere	None	Sol-Gel Method	Negative	199.89	203.3		-36.3		A549	50000	H	Human	Lung	Epithelial	Adult	L	24	500	MTT	TetrazoliumSalt		61.042		29	10.1016/j.nano.2015.03.004
768	2015	SiO2	I	Sphere	None	Sol-Gel Method	Negative	21.06	37.82		-24.5		A549	50000	H	Human	Lung	Epithelial	Adult	L	72	10	MTT	TetrazoliumSalt		58.542		29	10.1016/j.nano.2015.03.004
769	2015	SiO2	I	Sphere	None	Sol-Gel Method	Negative	21.06	37.82		-24.5		A549	50000	H	Human	Lung	Epithelial	Adult	L	72	50	MTT	TetrazoliumSalt		50.797		29	10.1016/j.nano.2015.03.004
770	2015	SiO2	I	Sphere	None	Sol-Gel Method	Negative	21.06	37.82		-24.5		A549	50000	H	Human	Lung	Epithelial	Adult	L	72	100	MTT	TetrazoliumSalt		49.886		29	10.1016/j.nano.2015.03.004
771	2015	SiO2	I	Sphere	None	Sol-Gel Method	Negative	21.06	37.82		-24.5		A549	50000	H	Human	Lung	Epithelial	Adult	L	72	200	MTT	TetrazoliumSalt		50.569		29	10.1016/j.nano.2015.03.004
772	2015	SiO2	I	Sphere	None	Sol-Gel Method	Negative	21.06	37.82		-24.5		A549	50000	H	Human	Lung	Epithelial	Adult	L	72	500	MTT	TetrazoliumSalt		44.647		29	10.1016/j.nano.2015.03.004
773	2015	SiO2	I	Sphere	None	Sol-Gel Method	Negative	59.72	70.12		-38.1		A549	50000	H	Human	Lung	Epithelial	Adult	L	72	10	MTT	TetrazoliumSalt		96.583		29	10.1016/j.nano.2015.03.004
774	2015	SiO2	I	Sphere	None	Sol-Gel Method	Negative	59.72	70.12		-38.1		A549	50000	H	Human	Lung	Epithelial	Adult	L	72	50	MTT	TetrazoliumSalt		53.303		29	10.1016/j.nano.2015.03.004
775	2015	SiO2	I	Sphere	None	Sol-Gel Method	Negative	59.72	70.12		-38.1		A549	50000	H	Human	Lung	Epithelial	Adult	L	72	100	MTT	TetrazoliumSalt		49.886		29	10.1016/j.nano.2015.03.004
776	2015	SiO2	I	Sphere	None	Sol-Gel Method	Negative	59.72	70.12		-38.1		A549	50000	H	Human	Lung	Epithelial	Adult	L	72	200	MTT	TetrazoliumSalt		31.435		29	10.1016/j.nano.2015.03.004
777	2015	SiO2	I	Sphere	None	Sol-Gel Method	Negative	59.72	70.12		-38.1		A549	50000	H	Human	Lung	Epithelial	Adult	L	72	500	MTT	TetrazoliumSalt		15.718		29	10.1016/j.nano.2015.03.004
778	2015	SiO2	I	Sphere	None	Sol-Gel Method	Negative	100.33	105.5		-31.7		A549	50000	H	Human	Lung	Epithelial	Adult	L	72	10	MTT	TetrazoliumSalt		68.337		29	10.1016/j.nano.2015.03.004
779	2015	SiO2	I	Sphere	None	Sol-Gel Method	Negative	100.33	105.5		-31.7		A549	50000	H	Human	Lung	Epithelial	Adult	L	72	50	MTT	TetrazoliumSalt		54.214		29	10.1016/j.nano.2015.03.004
780	2015	SiO2	I	Sphere	None	Sol-Gel Method	Negative	100.33	105.5		-31.7		A549	50000	H	Human	Lung	Epithelial	Adult	L	72	100	MTT	TetrazoliumSalt		51.708		29	10.1016/j.nano.2015.03.004
781	2015	SiO2	I	Sphere	None	Sol-Gel Method	Negative	100.33	105.5		-31.7		A549	50000	H	Human	Lung	Epithelial	Adult	L	72	200	MTT	TetrazoliumSalt		55.353		29	10.1016/j.nano.2015.03.004
782	2015	SiO2	I	Sphere	None	Sol-Gel Method	Negative	100.33	105.5		-31.7		A549	50000	H	Human	Lung	Epithelial	Adult	L	72	500	MTT	TetrazoliumSalt		53.531		29	10.1016/j.nano.2015.03.004
783	2015	SiO2	I	Sphere	None	Sol-Gel Method	Negative	199.89	203.3		-36.3		A549	50000	H	Human	Lung	Epithelial	Adult	L	72	10	MTT	TetrazoliumSalt		66.287		29	10.1016/j.nano.2015.03.004
784	2015	SiO2	I	Sphere	None	Sol-Gel Method	Negative	199.89	203.3		-36.3		A549	50000	H	Human	Lung	Epithelial	Adult	L	72	50	MTT	TetrazoliumSalt		50.569		29	10.1016/j.nano.2015.03.004
785	2015	SiO2	I	Sphere	None	Sol-Gel Method	Negative	199.89	203.3		-36.3		A549	50000	H	Human	Lung	Epithelial	Adult	L	72	100	MTT	TetrazoliumSalt		50.114		29	10.1016/j.nano.2015.03.004
786	2015	SiO2	I	Sphere	None	Sol-Gel Method	Negative	199.89	203.3		-36.3		A549	50000	H	Human	Lung	Epithelial	Adult	L	72	200	MTT	TetrazoliumSalt		50.797		29	10.1016/j.nano.2015.03.004
787	2015	SiO2	I	Sphere	None	Sol-Gel Method	Negative	199.89	203.3		-36.3		A549	50000	H	Human	Lung	Epithelial	Adult	L	72	500	MTT	TetrazoliumSalt		45.33		29	10.1016/j.nano.2015.03.004
788	2015	SiO2	I	Sphere	None	Sol-Gel Method	Negative	21.06	37.82		-24.5		NIH3T3	50000	A	Mouse	Embryo	Fibroblast	Embryonic	L	24	10	MTT	TetrazoliumSalt		65.366		29	10.1016/j.nano.2015.03.004
789	2015	SiO2	I	Sphere	None	Sol-Gel Method	Negative	21.06	37.82		-24.5		NIH3T3	50000	A	Mouse	Embryo	Fibroblast	Embryonic	L	24	50	MTT	TetrazoliumSalt		50		29	10.1016/j.nano.2015.03.004
790	2015	SiO2	I	Sphere	None	Sol-Gel Method	Negative	21.06	37.82		-24.5		NIH3T3	50000	A	Mouse	Embryo	Fibroblast	Embryonic	L	24	100	MTT	TetrazoliumSalt		44.39		29	10.1016/j.nano.2015.03.004
791	2015	SiO2	I	Sphere	None	Sol-Gel Method	Negative	21.06	37.82		-24.5		NIH3T3	50000	A	Mouse	Embryo	Fibroblast	Embryonic	L	24	200	MTT	TetrazoliumSalt		38.049		29	10.1016/j.nano.2015.03.004
792	2015	SiO2	I	Sphere	None	Sol-Gel Method	Negative	21.06	37.82		-24.5		NIH3T3	50000	A	Mouse	Embryo	Fibroblast	Embryonic	L	24	500	MTT	TetrazoliumSalt		34.146		29	10.1016/j.nano.2015.03.004
793	2015	SiO2	I	Sphere	None	Sol-Gel Method	Negative	59.72	70.12		-38.1		NIH3T3	50000	A	Mouse	Embryo	Fibroblast	Embryonic	L	24	10	MTT	TetrazoliumSalt		108.05		29	10.1016/j.nano.2015.03.004
794	2015	SiO2	I	Sphere	None	Sol-Gel Method	Negative	59.72	70.12		-38.1		NIH3T3	50000	A	Mouse	Embryo	Fibroblast	Embryonic	L	24	50	MTT	TetrazoliumSalt		54.146		29	10.1016/j.nano.2015.03.004
795	2015	SiO2	I	Sphere	None	Sol-Gel Method	Negative	59.72	70.12		-38.1		NIH3T3	50000	A	Mouse	Embryo	Fibroblast	Embryonic	L	24	100	MTT	TetrazoliumSalt		49.512		29	10.1016/j.nano.2015.03.004
796	2015	SiO2	I	Sphere	None	Sol-Gel Method	Negative	59.72	70.12		-38.1		NIH3T3	50000	A	Mouse	Embryo	Fibroblast	Embryonic	L	24	200	MTT	TetrazoliumSalt		42.683		29	10.1016/j.nano.2015.03.004
797	2015	SiO2	I	Sphere	None	Sol-Gel Method	Negative	59.72	70.12		-38.1		NIH3T3	50000	A	Mouse	Embryo	Fibroblast	Embryonic	L	24	500	MTT	TetrazoliumSalt		5.122		29	10.1016/j.nano.2015.03.004
798	2015	SiO2	I	Sphere	None	Sol-Gel Method	Negative	100.33	105.5		-31.7		NIH3T3	50000	A	Mouse	Embryo	Fibroblast	Embryonic	L	24	10	MTT	TetrazoliumSalt		53.902		29	10.1016/j.nano.2015.03.004
799	2015	SiO2	I	Sphere	None	Sol-Gel Method	Negative	100.33	105.5		-31.7		NIH3T3	50000	A	Mouse	Embryo	Fibroblast	Embryonic	L	24	50	MTT	TetrazoliumSalt		44.878		29	10.1016/j.nano.2015.03.004
800	2015	SiO2	I	Sphere	None	Sol-Gel Method	Negative	100.33	105.5		-31.7		NIH3T3	50000	A	Mouse	Embryo	Fibroblast	Embryonic	L	24	100	MTT	TetrazoliumSalt		34.878		29	10.1016/j.nano.2015.03.004
801	2015	SiO2	I	Sphere	None	Sol-Gel Method	Negative	100.33	105.5		-31.7		NIH3T3	50000	A	Mouse	Embryo	Fibroblast	Embryonic	L	24	200	MTT	TetrazoliumSalt		30.244		29	10.1016/j.nano.2015.03.004
802	2015	SiO2	I	Sphere	None	Sol-Gel Method	Negative	100.33	105.5		-31.7		NIH3T3	50000	A	Mouse	Embryo	Fibroblast	Embryonic	L	24	500	MTT	TetrazoliumSalt		29.024		29	10.1016/j.nano.2015.03.004
803	2015	SiO2	I	Sphere	None	Sol-Gel Method	Negative	199.89	203.3		-36.3		NIH3T3	50000	A	Mouse	Embryo	Fibroblast	Embryonic	L	24	10	MTT	TetrazoliumSalt		50		29	10.1016/j.nano.2015.03.004
804	2015	SiO2	I	Sphere	None	Sol-Gel Method	Negative	199.89	203.3		-36.3		NIH3T3	50000	A	Mouse	Embryo	Fibroblast	Embryonic	L	24	50	MTT	TetrazoliumSalt		40.732		29	10.1016/j.nano.2015.03.004
805	2015	SiO2	I	Sphere	None	Sol-Gel Method	Negative	199.89	203.3		-36.3		NIH3T3	50000	A	Mouse	Embryo	Fibroblast	Embryonic	L	24	100	MTT	TetrazoliumSalt		32.683		29	10.1016/j.nano.2015.03.004
806	2015	SiO2	I	Sphere	None	Sol-Gel Method	Negative	199.89	203.3		-36.3		NIH3T3	50000	A	Mouse	Embryo	Fibroblast	Embryonic	L	24	200	MTT	TetrazoliumSalt		24.878		29	10.1016/j.nano.2015.03.004
807	2015	SiO2	I	Sphere	None	Sol-Gel Method	Negative	199.89	203.3		-36.3		NIH3T3	50000	A	Mouse	Embryo	Fibroblast	Embryonic	L	24	500	MTT	TetrazoliumSalt		24.878		29	10.1016/j.nano.2015.03.004
808	2015	SiO2	I	Sphere	None	Sol-Gel Method	Negative	21.06	37.82		-24.5		NIH3T3	50000	A	Mouse	Embryo	Fibroblast	Embryonic	L	72	10	MTT	TetrazoliumSalt		45.578		29	10.1016/j.nano.2015.03.004
809	2015	SiO2	I	Sphere	None	Sol-Gel Method	Negative	21.06	37.82		-24.5		NIH3T3	50000	A	Mouse	Embryo	Fibroblast	Embryonic	L	72	50	MTT	TetrazoliumSalt		38.095		29	10.1016/j.nano.2015.03.004
810	2015	SiO2	I	Sphere	None	Sol-Gel Method	Negative	21.06	37.82		-24.5		NIH3T3	50000	A	Mouse	Embryo	Fibroblast	Embryonic	L	72	100	MTT	TetrazoliumSalt		34.921		29	10.1016/j.nano.2015.03.004
811	2015	SiO2	I	Sphere	None	Sol-Gel Method	Negative	21.06	37.82		-24.5		NIH3T3	50000	A	Mouse	Embryo	Fibroblast	Embryonic	L	72	200	MTT	TetrazoliumSalt		27.891		29	10.1016/j.nano.2015.03.004
812	2015	SiO2	I	Sphere	None	Sol-Gel Method	Negative	21.06	37.82		-24.5		NIH3T3	50000	A	Mouse	Embryo	Fibroblast	Embryonic	L	72	500	MTT	TetrazoliumSalt		17.007		29	10.1016/j.nano.2015.03.004
813	2015	SiO2	I	Sphere	None	Sol-Gel Method	Negative	59.72	70.12		-38.1		NIH3T3	50000	A	Mouse	Embryo	Fibroblast	Embryonic	L	72	10	MTT	TetrazoliumSalt		87.528		29	10.1016/j.nano.2015.03.004
814	2015	SiO2	I	Sphere	None	Sol-Gel Method	Negative	59.72	70.12		-38.1		NIH3T3	50000	A	Mouse	Embryo	Fibroblast	Embryonic	L	72	50	MTT	TetrazoliumSalt		32.2		29	10.1016/j.nano.2015.03.004
815	2015	SiO2	I	Sphere	None	Sol-Gel Method	Negative	59.72	70.12		-38.1		NIH3T3	50000	A	Mouse	Embryo	Fibroblast	Embryonic	L	72	100	MTT	TetrazoliumSalt		30.839		29	10.1016/j.nano.2015.03.004
816	2015	SiO2	I	Sphere	None	Sol-Gel Method	Negative	59.72	70.12		-38.1		NIH3T3	50000	A	Mouse	Embryo	Fibroblast	Embryonic	L	72	200	MTT	TetrazoliumSalt		23.356		29	10.1016/j.nano.2015.03.004
817	2015	SiO2	I	Sphere	None	Sol-Gel Method	Negative	59.72	70.12		-38.1		NIH3T3	50000	A	Mouse	Embryo	Fibroblast	Embryonic	L	72	500	MTT	TetrazoliumSalt		1.1338		29	10.1016/j.nano.2015.03.004
818	2015	SiO2	I	Sphere	None	Sol-Gel Method	Negative	100.33	105.5		-31.7		NIH3T3	50000	A	Mouse	Embryo	Fibroblast	Embryonic	L	72	10	MTT	TetrazoliumSalt		42.63		29	10.1016/j.nano.2015.03.004
819	2015	SiO2	I	Sphere	None	Sol-Gel Method	Negative	100.33	105.5		-31.7		NIH3T3	50000	A	Mouse	Embryo	Fibroblast	Embryonic	L	72	50	MTT	TetrazoliumSalt		34.467		29	10.1016/j.nano.2015.03.004
820	2015	SiO2	I	Sphere	None	Sol-Gel Method	Negative	100.33	105.5		-31.7		NIH3T3	50000	A	Mouse	Embryo	Fibroblast	Embryonic	L	72	100	MTT	TetrazoliumSalt		31.973		29	10.1016/j.nano.2015.03.004
821	2015	SiO2	I	Sphere	None	Sol-Gel Method	Negative	100.33	105.5		-31.7		NIH3T3	50000	A	Mouse	Embryo	Fibroblast	Embryonic	L	72	200	MTT	TetrazoliumSalt		27.891		29	10.1016/j.nano.2015.03.004
822	2015	SiO2	I	Sphere	None	Sol-Gel Method	Negative	100.33	105.5		-31.7		NIH3T3	50000	A	Mouse	Embryo	Fibroblast	Embryonic	L	72	500	MTT	TetrazoliumSalt		17.234		29	10.1016/j.nano.2015.03.004
823	2015	SiO2	I	Sphere	None	Sol-Gel Method	Negative	199.89	203.3		-36.3		NIH3T3	50000	A	Mouse	Embryo	Fibroblast	Embryonic	L	72	10	MTT	TetrazoliumSalt		42.177		29	10.1016/j.nano.2015.03.004
824	2015	SiO2	I	Sphere	None	Sol-Gel Method	Negative	199.89	203.3		-36.3		NIH3T3	50000	A	Mouse	Embryo	Fibroblast	Embryonic	L	72	50	MTT	TetrazoliumSalt		29.252		29	10.1016/j.nano.2015.03.004
825	2015	SiO2	I	Sphere	None	Sol-Gel Method	Negative	199.89	203.3		-36.3		NIH3T3	50000	A	Mouse	Embryo	Fibroblast	Embryonic	L	72	100	MTT	TetrazoliumSalt		24.943		29	10.1016/j.nano.2015.03.004
826	2015	SiO2	I	Sphere	None	Sol-Gel Method	Negative	199.89	203.3		-36.3		NIH3T3	50000	A	Mouse	Embryo	Fibroblast	Embryonic	L	72	200	MTT	TetrazoliumSalt		22.676		29	10.1016/j.nano.2015.03.004
827	2015	SiO2	I	Sphere	None	Sol-Gel Method	Negative	199.89	203.3		-36.3		NIH3T3	50000	A	Mouse	Embryo	Fibroblast	Embryonic	L	72	500	MTT	TetrazoliumSalt		12.245		29	10.1016/j.nano.2015.03.004
828	2015	SiO2	I	Sphere	None	Sol-Gel Method	Negative	21.06	37.82		-24.5		HepG2	50000	H	Human	Liver	Epithelial	Adult	L	24	10	MTT	TetrazoliumSalt		68.856		29	10.1016/j.nano.2015.03.004
829	2015	SiO2	I	Sphere	None	Sol-Gel Method	Negative	21.06	37.82		-24.5		HepG2	50000	H	Human	Liver	Epithelial	Adult	L	24	50	MTT	TetrazoliumSalt		61.071		29	10.1016/j.nano.2015.03.004
830	2015	SiO2	I	Sphere	None	Sol-Gel Method	Negative	21.06	37.82		-24.5		HepG2	50000	H	Human	Liver	Epithelial	Adult	L	24	100	MTT	TetrazoliumSalt		59.611		29	10.1016/j.nano.2015.03.004
831	2015	SiO2	I	Sphere	None	Sol-Gel Method	Negative	21.06	37.82		-24.5		HepG2	50000	H	Human	Liver	Epithelial	Adult	L	24	200	MTT	TetrazoliumSalt		59.124		29	10.1016/j.nano.2015.03.004
832	2015	SiO2	I	Sphere	None	Sol-Gel Method	Negative	21.06	37.82		-24.5		HepG2	50000	H	Human	Liver	Epithelial	Adult	L	24	500	MTT	TetrazoliumSalt		58.151		29	10.1016/j.nano.2015.03.004
833	2015	SiO2	I	Sphere	None	Sol-Gel Method	Negative	59.72	70.12		-38.1		HepG2	50000	H	Human	Liver	Epithelial	Adult	L	24	10	MTT	TetrazoliumSalt		99.757		29	10.1016/j.nano.2015.03.004
834	2015	SiO2	I	Sphere	None	Sol-Gel Method	Negative	59.72	70.12		-38.1		HepG2	50000	H	Human	Liver	Epithelial	Adult	L	24	50	MTT	TetrazoliumSalt		67.397		29	10.1016/j.nano.2015.03.004
835	2015	SiO2	I	Sphere	None	Sol-Gel Method	Negative	59.72	70.12		-38.1		HepG2	50000	H	Human	Liver	Epithelial	Adult	L	24	100	MTT	TetrazoliumSalt		66.423		29	10.1016/j.nano.2015.03.004
836	2015	SiO2	I	Sphere	None	Sol-Gel Method	Negative	59.72	70.12		-38.1		HepG2	50000	H	Human	Liver	Epithelial	Adult	L	24	200	MTT	TetrazoliumSalt		62.774		29	10.1016/j.nano.2015.03.004
837	2015	SiO2	I	Sphere	None	Sol-Gel Method	Negative	59.72	70.12		-38.1		HepG2	50000	H	Human	Liver	Epithelial	Adult	L	24	500	MTT	TetrazoliumSalt		53.041		29	10.1016/j.nano.2015.03.004
838	2015	SiO2	I	Sphere	None	Sol-Gel Method	Negative	100.33	105.5		-31.7		HepG2	50000	H	Human	Liver	Epithelial	Adult	L	24	10	MTT	TetrazoliumSalt		68.613		29	10.1016/j.nano.2015.03.004
839	2015	SiO2	I	Sphere	None	Sol-Gel Method	Negative	100.33	105.5		-31.7		HepG2	50000	H	Human	Liver	Epithelial	Adult	L	24	50	MTT	TetrazoliumSalt		66.423		29	10.1016/j.nano.2015.03.004
840	2015	SiO2	I	Sphere	None	Sol-Gel Method	Negative	100.33	105.5		-31.7		HepG2	50000	H	Human	Liver	Epithelial	Adult	L	24	100	MTT	TetrazoliumSalt		65.207		29	10.1016/j.nano.2015.03.004
841	2015	SiO2	I	Sphere	None	Sol-Gel Method	Negative	100.33	105.5		-31.7		HepG2	50000	H	Human	Liver	Epithelial	Adult	L	24	200	MTT	TetrazoliumSalt		63.99		29	10.1016/j.nano.2015.03.004
842	2015	SiO2	I	Sphere	None	Sol-Gel Method	Negative	100.33	105.5		-31.7		HepG2	50000	H	Human	Liver	Epithelial	Adult	L	24	500	MTT	TetrazoliumSalt		64.477		29	10.1016/j.nano.2015.03.004
843	2015	SiO2	I	Sphere	None	Sol-Gel Method	Negative	199.89	203.3		-36.3		HepG2	50000	H	Human	Liver	Epithelial	Adult	L	24	10	MTT	TetrazoliumSalt		68.856		29	10.1016/j.nano.2015.03.004
844	2015	SiO2	I	Sphere	None	Sol-Gel Method	Negative	199.89	203.3		-36.3		HepG2	50000	H	Human	Liver	Epithelial	Adult	L	24	50	MTT	TetrazoliumSalt		63.504		29	10.1016/j.nano.2015.03.004
845	2015	SiO2	I	Sphere	None	Sol-Gel Method	Negative	199.89	203.3		-36.3		HepG2	50000	H	Human	Liver	Epithelial	Adult	L	24	100	MTT	TetrazoliumSalt		62.287		29	10.1016/j.nano.2015.03.004
846	2015	SiO2	I	Sphere	None	Sol-Gel Method	Negative	199.89	203.3		-36.3		HepG2	50000	H	Human	Liver	Epithelial	Adult	L	24	200	MTT	TetrazoliumSalt		60.584		29	10.1016/j.nano.2015.03.004
847	2015	SiO2	I	Sphere	None	Sol-Gel Method	Negative	199.89	203.3		-36.3		HepG2	50000	H	Human	Liver	Epithelial	Adult	L	24	500	MTT	TetrazoliumSalt		58.151		29	10.1016/j.nano.2015.03.004
848	2015	SiO2	I	Sphere	None	Sol-Gel Method	Negative	21.06	37.82		-24.5		HepG2	50000	H	Human	Liver	Epithelial	Adult	L	72	10	MTT	TetrazoliumSalt		57.011		29	10.1016/j.nano.2015.03.004
849	2015	SiO2	I	Sphere	None	Sol-Gel Method	Negative	21.06	37.82		-24.5		HepG2	50000	H	Human	Liver	Epithelial	Adult	L	72	50	MTT	TetrazoliumSalt		55.172		29	10.1016/j.nano.2015.03.004
850	2015	SiO2	I	Sphere	None	Sol-Gel Method	Negative	21.06	37.82		-24.5		HepG2	50000	H	Human	Liver	Epithelial	Adult	L	72	100	MTT	TetrazoliumSalt		55.172		29	10.1016/j.nano.2015.03.004
851	2015	SiO2	I	Sphere	None	Sol-Gel Method	Negative	21.06	37.82		-24.5		HepG2	50000	H	Human	Liver	Epithelial	Adult	L	72	200	MTT	TetrazoliumSalt		49.425		29	10.1016/j.nano.2015.03.004
852	2015	SiO2	I	Sphere	None	Sol-Gel Method	Negative	21.06	37.82		-24.5		HepG2	50000	H	Human	Liver	Epithelial	Adult	L	72	500	MTT	TetrazoliumSalt		46.437		29	10.1016/j.nano.2015.03.004
853	2015	SiO2	I	Sphere	None	Sol-Gel Method	Negative	59.72	70.12		-38.1		HepG2	50000	H	Human	Liver	Epithelial	Adult	L	72	10	MTT	TetrazoliumSalt		95.172		29	10.1016/j.nano.2015.03.004
854	2015	SiO2	I	Sphere	None	Sol-Gel Method	Negative	59.72	70.12		-38.1		HepG2	50000	H	Human	Liver	Epithelial	Adult	L	72	50	MTT	TetrazoliumSalt		65.747		29	10.1016/j.nano.2015.03.004
855	2015	SiO2	I	Sphere	None	Sol-Gel Method	Negative	59.72	70.12		-38.1		HepG2	50000	H	Human	Liver	Epithelial	Adult	L	72	100	MTT	TetrazoliumSalt		60.92		29	10.1016/j.nano.2015.03.004
856	2015	SiO2	I	Sphere	None	Sol-Gel Method	Negative	59.72	70.12		-38.1		HepG2	50000	H	Human	Liver	Epithelial	Adult	L	72	200	MTT	TetrazoliumSalt		54.713		29	10.1016/j.nano.2015.03.004
857	2015	SiO2	I	Sphere	None	Sol-Gel Method	Negative	59.72	70.12		-38.1		HepG2	50000	H	Human	Liver	Epithelial	Adult	L	72	500	MTT	TetrazoliumSalt		42.299		29	10.1016/j.nano.2015.03.004
858	2015	SiO2	I	Sphere	None	Sol-Gel Method	Negative	100.33	105.5		-31.7		HepG2	50000	H	Human	Liver	Epithelial	Adult	L	72	10	MTT	TetrazoliumSalt		66.437		29	10.1016/j.nano.2015.03.004
859	2015	SiO2	I	Sphere	None	Sol-Gel Method	Negative	100.33	105.5		-31.7		HepG2	50000	H	Human	Liver	Epithelial	Adult	L	72	50	MTT	TetrazoliumSalt		58.161		29	10.1016/j.nano.2015.03.004
860	2015	SiO2	I	Sphere	None	Sol-Gel Method	Negative	100.33	105.5		-31.7		HepG2	50000	H	Human	Liver	Epithelial	Adult	L	72	100	MTT	TetrazoliumSalt		56.322		29	10.1016/j.nano.2015.03.004
861	2015	SiO2	I	Sphere	None	Sol-Gel Method	Negative	100.33	105.5		-31.7		HepG2	50000	H	Human	Liver	Epithelial	Adult	L	72	200	MTT	TetrazoliumSalt		56.322		29	10.1016/j.nano.2015.03.004
862	2015	SiO2	I	Sphere	None	Sol-Gel Method	Negative	100.33	105.5		-31.7		HepG2	50000	H	Human	Liver	Epithelial	Adult	L	72	500	MTT	TetrazoliumSalt		55.862		29	10.1016/j.nano.2015.03.004
863	2015	SiO2	I	Sphere	None	Sol-Gel Method	Negative	199.89	203.3		-36.3		HepG2	50000	H	Human	Liver	Epithelial	Adult	L	72	10	MTT	TetrazoliumSalt		64.138		29	10.1016/j.nano.2015.03.004
864	2015	SiO2	I	Sphere	None	Sol-Gel Method	Negative	199.89	203.3		-36.3		HepG2	50000	H	Human	Liver	Epithelial	Adult	L	72	50	MTT	TetrazoliumSalt		55.172		29	10.1016/j.nano.2015.03.004
865	2015	SiO2	I	Sphere	None	Sol-Gel Method	Negative	199.89	203.3		-36.3		HepG2	50000	H	Human	Liver	Epithelial	Adult	L	72	100	MTT	TetrazoliumSalt		54.023		29	10.1016/j.nano.2015.03.004
866	2015	SiO2	I	Sphere	None	Sol-Gel Method	Negative	199.89	203.3		-36.3		HepG2	50000	H	Human	Liver	Epithelial	Adult	L	72	200	MTT	TetrazoliumSalt		51.264		29	10.1016/j.nano.2015.03.004
867	2015	SiO2	I	Sphere	None	Sol-Gel Method	Negative	199.89	203.3		-36.3		HepG2	50000	H	Human	Liver	Epithelial	Adult	L	72	500	MTT	TetrazoliumSalt		51.034		29	10.1016/j.nano.2015.03.004
868	2018	Pt	I	Sphere	None	Green Synthesis	Negative	24.6	160		-11		HEK293	10000	H	Human	Kidney	Epithelial	Embryonic	L	6	20	MTS	TetrazoliumSalt		99.06		30	10.1177/1559325818807382
869	2018	Pt	I	Sphere	None	Green Synthesis	Negative	24.6	160		-11		HEK293	10000	H	Human	Kidney	Epithelial	Embryonic	L	6	60	MTS	TetrazoliumSalt		96.9		30	10.1177/1559325818807382
870	2018	Pt	I	Sphere	None	Green Synthesis	Negative	24.6	160		-11		HEK293	10000	H	Human	Kidney	Epithelial	Embryonic	L	6	180	MTS	TetrazoliumSalt		98.5		30	10.1177/1559325818807382
871	2018	Pt	I	Sphere	None	Green Synthesis	Negative	24.6	160		-11		HEK293	10000	H	Human	Kidney	Epithelial	Embryonic	L	6	360	MTS	TetrazoliumSalt		88.5		30	10.1177/1559325818807382
872	2018	Pt	I	Sphere	None	Green Synthesis	Negative	24.6	160		-11		HEK293	10000	H	Human	Kidney	Epithelial	Embryonic	L	24	20	MTS	TetrazoliumSalt		95		30	10.1177/1559325818807382
873	2018	Pt	I	Sphere	None	Green Synthesis	Negative	24.6	160		-11		HEK293	10000	H	Human	Kidney	Epithelial	Embryonic	L	24	60	MTS	TetrazoliumSalt		91		30	10.1177/1559325818807382
874	2018	Pt	I	Sphere	None	Green Synthesis	Negative	24.6	160		-11		HEK293	10000	H	Human	Kidney	Epithelial	Embryonic	L	24	180	MTS	TetrazoliumSalt		83.9		30	10.1177/1559325818807382
875	2018	Pt	I	Sphere	None	Green Synthesis	Negative	24.6	160		-11		HEK293	10000	H	Human	Kidney	Epithelial	Embryonic	L	24	360	MTS	TetrazoliumSalt		70.5		30	10.1177/1559325818807382
876	2018	Pt	I	Sphere	None	Green Synthesis	Negative	24.6	160		-11		HEK293	10000	H	Human	Kidney	Epithelial	Embryonic	L	48	20	MTS	TetrazoliumSalt		90		30	10.1177/1559325818807382
877	2018	Pt	I	Sphere	None	Green Synthesis	Negative	24.6	160		-11		HEK293	10000	H	Human	Kidney	Epithelial	Embryonic	L	48	60	MTS	TetrazoliumSalt		86		30	10.1177/1559325818807382
878	2018	Pt	I	Sphere	None	Green Synthesis	Negative	24.6	160		-11		HEK293	10000	H	Human	Kidney	Epithelial	Embryonic	L	48	180	MTS	TetrazoliumSalt		68.25		30	10.1177/1559325818807382
879	2018	Pt	I	Sphere	None	Green Synthesis	Negative	24.6	160		-11		HEK293	10000	H	Human	Kidney	Epithelial	Embryonic	L	48	360	MTS	TetrazoliumSalt		54.15		30	10.1177/1559325818807382
880	2018	Pt	I	Sphere	None	Green Synthesis	Negative	24.6	160		-11		HEK293	10000	H	Human	Kidney	Epithelial	Embryonic	L	6	20	NRU	NeutralRed		97.666		30	10.1177/1559325818807382
881	2018	Pt	I	Sphere	None	Green Synthesis	Negative	24.6	160		-11		HEK293	10000	H	Human	Kidney	Epithelial	Embryonic	L	6	60	NRU	NeutralRed		98.423		30	10.1177/1559325818807382
882	2018	Pt	I	Sphere	None	Green Synthesis	Negative	24.6	160		-11		HEK293	10000	H	Human	Kidney	Epithelial	Embryonic	L	6	180	NRU	NeutralRed		93.205		30	10.1177/1559325818807382
883	2018	Pt	I	Sphere	None	Green Synthesis	Negative	24.6	160		-11		HEK293	10000	H	Human	Kidney	Epithelial	Embryonic	L	6	360	NRU	NeutralRed		90.852		30	10.1177/1559325818807382
884	2018	Pt	I	Sphere	None	Green Synthesis	Negative	24.6	160		-11		HEK293	10000	H	Human	Kidney	Epithelial	Embryonic	L	24	20	NRU	NeutralRed		91.798		30	10.1177/1559325818807382
885	2018	Pt	I	Sphere	None	Green Synthesis	Negative	24.6	160		-11		HEK293	10000	H	Human	Kidney	Epithelial	Embryonic	L	24	60	NRU	NeutralRed		89.148		30	10.1177/1559325818807382
886	2018	Pt	I	Sphere	None	Green Synthesis	Negative	24.6	160		-11		HEK293	10000	H	Human	Kidney	Epithelial	Embryonic	L	24	180	NRU	NeutralRed		86.877		30	10.1177/1559325818807382
887	2018	Pt	I	Sphere	None	Green Synthesis	Negative	24.6	160		-11		HEK293	10000	H	Human	Kidney	Epithelial	Embryonic	L	24	360	NRU	NeutralRed		78.17		30	10.1177/1559325818807382
888	2018	Pt	I	Sphere	None	Green Synthesis	Negative	24.6	160		-11		HEK293	10000	H	Human	Kidney	Epithelial	Embryonic	L	48	20	NRU	NeutralRed		93.691		30	10.1177/1559325818807382
889	2018	Pt	I	Sphere	None	Green Synthesis	Negative	24.6	160		-11		HEK293	10000	H	Human	Kidney	Epithelial	Embryonic	L	48	60	NRU	NeutralRed		80.631		30	10.1177/1559325818807382
890	2018	Pt	I	Sphere	None	Green Synthesis	Negative	24.6	160		-11		HEK293	10000	H	Human	Kidney	Epithelial	Embryonic	L	48	180	NRU	NeutralRed		73.628		30	10.1177/1559325818807382
891	2018	Pt	I	Sphere	None	Green Synthesis	Negative	24.6	160		-11		HEK293	10000	H	Human	Kidney	Epithelial	Embryonic	L	48	360	NRU	NeutralRed		58.297		30	10.1177/1559325818807382
892	2018	Pt	I	Sphere	None	Green Synthesis		20.12					MCF-7	50000	H	Human	Breast	Epithelial	Adult	L	24	2.5	MTT	TetrazoliumSalt		95		31	10.1016/j.colsurfb.2017.12.042
893	2018	Pt	I	Sphere	None	Green Synthesis		20.12					MCF-7	50000	H	Human	Breast	Epithelial	Adult	L	24	5	MTT	TetrazoliumSalt		78.548		31	10.1016/j.colsurfb.2017.12.042
894	2018	Pt	I	Sphere	None	Green Synthesis		20.12					MCF-7	50000	H	Human	Breast	Epithelial	Adult	L	24	10	MTT	TetrazoliumSalt		60.645		31	10.1016/j.colsurfb.2017.12.042
895	2018	Pt	I	Sphere	None	Green Synthesis		20.12					MCF-7	50000	H	Human	Breast	Epithelial	Adult	L	24	20	MTT	TetrazoliumSalt		37.903		31	10.1016/j.colsurfb.2017.12.042
896	2018	Pt	I	Sphere	None	Green Synthesis		20.12					MCF-7	50000	H	Human	Breast	Epithelial	Adult	L	24	40	MTT	TetrazoliumSalt		35.968		31	10.1016/j.colsurfb.2017.12.042
897	2018	Pt	I	Sphere	None	Green Synthesis		20.12					MCF-7	50000	H	Human	Breast	Epithelial	Adult	L	24	50	MTT	TetrazoliumSalt		30.968		31	10.1016/j.colsurfb.2017.12.042
898	2018	Pt	I	Sphere	None	Green Synthesis		20.12					MCF-7	50000	H	Human	Breast	Epithelial	Adult	L	48	2.5	MTT	TetrazoliumSalt		90		31	10.1016/j.colsurfb.2017.12.042
899	2018	Pt	I	Sphere	None	Green Synthesis		20.12					MCF-7	50000	H	Human	Breast	Epithelial	Adult	L	48	5	MTT	TetrazoliumSalt		70		31	10.1016/j.colsurfb.2017.12.042
900	2018	Pt	I	Sphere	None	Green Synthesis		20.12					MCF-7	50000	H	Human	Breast	Epithelial	Adult	L	48	10	MTT	TetrazoliumSalt		49.194		31	10.1016/j.colsurfb.2017.12.042
901	2018	Pt	I	Sphere	None	Green Synthesis		20.12					MCF-7	50000	H	Human	Breast	Epithelial	Adult	L	48	20	MTT	TetrazoliumSalt		36.29		31	10.1016/j.colsurfb.2017.12.042
902	2018	Pt	I	Sphere	None	Green Synthesis		20.12					MCF-7	50000	H	Human	Breast	Epithelial	Adult	L	48	40	MTT	TetrazoliumSalt		26.935		31	10.1016/j.colsurfb.2017.12.042
903	2018	Pt	I	Sphere	None	Green Synthesis		20.12					MCF-7	50000	H	Human	Breast	Epithelial	Adult	L	48	50	MTT	TetrazoliumSalt		24.032		31	10.1016/j.colsurfb.2017.12.042
904	2018	Pt	I	Sphere	None	Green Synthesis		20.12					MCF-7	50000	H	Human	Breast	Epithelial	Adult	L	72	2.5	MTT	TetrazoliumSalt		83.871		31	10.1016/j.colsurfb.2017.12.042
905	2018	Pt	I	Sphere	None	Green Synthesis		20.12					MCF-7	50000	H	Human	Breast	Epithelial	Adult	L	72	5	MTT	TetrazoliumSalt		67.581		31	10.1016/j.colsurfb.2017.12.042
906	2018	Pt	I	Sphere	None	Green Synthesis		20.12					MCF-7	50000	H	Human	Breast	Epithelial	Adult	L	72	10	MTT	TetrazoliumSalt		48.226		31	10.1016/j.colsurfb.2017.12.042
907	2018	Pt	I	Sphere	None	Green Synthesis		20.12					MCF-7	50000	H	Human	Breast	Epithelial	Adult	L	72	20	MTT	TetrazoliumSalt		25.806		31	10.1016/j.colsurfb.2017.12.042
908	2018	Pt	I	Sphere	None	Green Synthesis		20.12					MCF-7	50000	H	Human	Breast	Epithelial	Adult	L	72	40	MTT	TetrazoliumSalt		21.452		31	10.1016/j.colsurfb.2017.12.042
909	2018	Pt	I	Sphere	None	Green Synthesis		20.12					MCF-7	50000	H	Human	Breast	Epithelial	Adult	L	72	50	MTT	TetrazoliumSalt		15.484		31	10.1016/j.colsurfb.2017.12.042
910	2019	Pt	I	Sphere	None	Biosynthesis		1.5	2				THP-1	100000	H	Human	Blood	Monocyte	Adult	L	24	25	CCK-8	TetrazoliumSalt		100		32	10.3390/cells8050444
911	2019	Pt	I	Sphere	None	Biosynthesis		1.5	2				THP-1	100000	H	Human	Blood	Monocyte	Adult	L	24	50	CCK-8	TetrazoliumSalt		80.027		32	10.3390/cells8050444
912	2019	Pt	I	Sphere	None	Biosynthesis		1.5	2				THP-1	100000	H	Human	Blood	Monocyte	Adult	L	24	75	CCK-8	TetrazoliumSalt		59.783		32	10.3390/cells8050444
913	2019	Pt	I	Sphere	None	Biosynthesis		1.5	2				THP-1	100000	H	Human	Blood	Monocyte	Adult	L	24	100	CCK-8	TetrazoliumSalt		40.082		32	10.3390/cells8050444
914	2019	Pt	I	Sphere	None	Biosynthesis		1.5	2				THP-1	100000	H	Human	Blood	Monocyte	Adult	L	24	125	CCK-8	TetrazoliumSalt		19.973		32	10.3390/cells8050444
915	2019	Pt	I	Sphere	None	Biosynthesis		1.5	2				THP-1	100000	H	Human	Blood	Monocyte	Adult	L	24	150	CCK-8	TetrazoliumSalt		10.054		32	10.3390/cells8050444
916	2018	Pt	I	Sphere	Citrate	Commercial	Negative	68.3	85.9	112.4	-40.6	-12.2	HepG2	30000	H	Human	Liver	Epithelial	Adult	L	24	5	MTS	TetrazoliumSalt		100	0.158	33	10.1155/2018/1367801
917	2018	Pt	I	Sphere	Citrate	Commercial	Negative	68.3	85.9	112.4	-40.6	-12.2	HepG2	30000	H	Human	Liver	Epithelial	Adult	L	24	25	MTS	TetrazoliumSalt		94.475	0.158	33	10.1155/2018/1367801
918	2018	Pt	I	Sphere	Citrate	Commercial	Negative	68.3	85.9	112.4	-40.6	-12.2	HepG2	30000	H	Human	Liver	Epithelial	Adult	L	24	100	MTS	TetrazoliumSalt		68.646	0.158	33	10.1155/2018/1367801
919	2013	CuO	I	Sphere	None	Commercial	Negative	55.8		68.5		-32.8	HaCat	10000	H	Human	Skin	Keratinocyte	Adult	L	24	5	MTT	TetrazoliumSalt		96.2		34	10.1177/1091581813487563
920	2013	CuO	I	Sphere	None	Commercial	Negative	55.8		68.5		-32.8	HaCat	10000	H	Human	Skin	Keratinocyte	Adult	L	24	10	MTT	TetrazoliumSalt		86.01		34	10.1177/1091581813487563
921	2013	CuO	I	Sphere	None	Commercial	Negative	55.8		68.5		-32.8	HaCat	10000	H	Human	Skin	Keratinocyte	Adult	L	24	20	MTT	TetrazoliumSalt		70		34	10.1177/1091581813487563
922	2013	CuO	I	Sphere	None	Commercial	Negative	55.8		68.5		-32.8	HaCat	10000	H	Human	Skin	Keratinocyte	Adult	L	24	30	MTT	TetrazoliumSalt		49.7		34	10.1177/1091581813487563
923	2013	CuO	I	Sphere	None	Commercial	Negative	55.8		68.5		-32.8	HaCat	10000	H	Human	Skin	Keratinocyte	Adult	L	48	5	MTT	TetrazoliumSalt		92.96		34	10.1177/1091581813487563
924	2013	CuO	I	Sphere	None	Commercial	Negative	55.8		68.5		-32.8	HaCat	10000	H	Human	Skin	Keratinocyte	Adult	L	48	10	MTT	TetrazoliumSalt		79.9		34	10.1177/1091581813487563
925	2013	CuO	I	Sphere	None	Commercial	Negative	55.8		68.5		-32.8	HaCat	10000	H	Human	Skin	Keratinocyte	Adult	L	48	20	MTT	TetrazoliumSalt		58.43		34	10.1177/1091581813487563
926	2013	CuO	I	Sphere	None	Commercial	Negative	55.8		68.5		-32.8	HaCat	10000	H	Human	Skin	Keratinocyte	Adult	L	48	30	MTT	TetrazoliumSalt		30.4		34	10.1177/1091581813487563
927	2019	TiO2	I	Sphere	None	Commercial		6		780			SIRC	60000	A	Rabbit	Cornea	Fibroblast	Adult	L	24	1	MTT	TetrazoliumSalt		98.308		35	10.5487/TR.2019.35.3.287
928	2019	TiO2	I	Sphere	None	Commercial		6		780			SIRC	60000	A	Rabbit	Cornea	Fibroblast	Adult	L	24	10	MTT	TetrazoliumSalt		94.416		35	10.5487/TR.2019.35.3.287
929	2019	TiO2	I	Sphere	None	Commercial		6		780			SIRC	60000	A	Rabbit	Cornea	Fibroblast	Adult	L	24	12.5	MTT	TetrazoliumSalt		93.232		35	10.5487/TR.2019.35.3.287
930	2019	TiO2	I	Sphere	None	Commercial		6		780			SIRC	60000	A	Rabbit	Cornea	Fibroblast	Adult	L	24	25	MTT	TetrazoliumSalt		92.047		35	10.5487/TR.2019.35.3.287
931	2019	TiO2	I	Sphere	None	Commercial		6		780			SIRC	60000	A	Rabbit	Cornea	Fibroblast	Adult	L	24	50	MTT	TetrazoliumSalt		89.34		35	10.5487/TR.2019.35.3.287
932	2019	TiO2	I	Sphere	None	Commercial		6		780			SIRC	60000	A	Rabbit	Cornea	Fibroblast	Adult	L	24	100	MTT	TetrazoliumSalt		87.31		35	10.5487/TR.2019.35.3.287
933	2019	ZnO	I	Sphere	None	Commercial		141		404			SIRC	60000	A	Rabbit	Cornea	Fibroblast	Adult	L	24	1	MTT	TetrazoliumSalt		93.57		35	10.5487/TR.2019.35.3.287
934	2019	ZnO	I	Sphere	None	Commercial		141		404			SIRC	60000	A	Rabbit	Cornea	Fibroblast	Adult	L	24	10	MTT	TetrazoliumSalt		85.448		35	10.5487/TR.2019.35.3.287
935	2019	ZnO	I	Sphere	None	Commercial		141		404			SIRC	60000	A	Rabbit	Cornea	Fibroblast	Adult	L	24	12.5	MTT	TetrazoliumSalt		61.083		35	10.5487/TR.2019.35.3.287
936	2019	ZnO	I	Sphere	None	Commercial		141		404			SIRC	60000	A	Rabbit	Cornea	Fibroblast	Adult	L	24	25	MTT	TetrazoliumSalt		15.736		35	10.5487/TR.2019.35.3.287
937	2019	ZnO	I	Sphere	None	Commercial		141		404			SIRC	60000	A	Rabbit	Cornea	Fibroblast	Adult	L	24	50	MTT	TetrazoliumSalt		9.6447		35	10.5487/TR.2019.35.3.287
938	2019	ZnO	I	Sphere	None	Commercial		141		404			SIRC	60000	A	Rabbit	Cornea	Fibroblast	Adult	L	24	100	MTT	TetrazoliumSalt		5.9222		35	10.5487/TR.2019.35.3.287
939	2019	SiO2	I	Sphere	None	Commercial		18.3		224			SIRC	60000	A	Rabbit	Cornea	Fibroblast	Adult	L	24	1	MTT	TetrazoliumSalt		96.277		35	10.5487/TR.2019.35.3.287
940	2019	SiO2	I	Sphere	None	Commercial		18.3		224			SIRC	60000	A	Rabbit	Cornea	Fibroblast	Adult	L	24	10	MTT	TetrazoliumSalt		94.247		35	10.5487/TR.2019.35.3.287
941	2019	SiO2	I	Sphere	None	Commercial		18.3		224			SIRC	60000	A	Rabbit	Cornea	Fibroblast	Adult	L	24	12.5	MTT	TetrazoliumSalt		95.601		35	10.5487/TR.2019.35.3.287
942	2019	SiO2	I	Sphere	None	Commercial		18.3		224			SIRC	60000	A	Rabbit	Cornea	Fibroblast	Adult	L	24	25	MTT	TetrazoliumSalt		97.293		35	10.5487/TR.2019.35.3.287
943	2019	SiO2	I	Sphere	None	Commercial		18.3		224			SIRC	60000	A	Rabbit	Cornea	Fibroblast	Adult	L	24	50	MTT	TetrazoliumSalt		96.447		35	10.5487/TR.2019.35.3.287
944	2019	SiO2	I	Sphere	None	Commercial		18.3		224			SIRC	60000	A	Rabbit	Cornea	Fibroblast	Adult	L	24	100	MTT	TetrazoliumSalt		93.57		35	10.5487/TR.2019.35.3.287
945	2019	CeO2	I	Sphere	None	Commercial		33		299			SIRC	60000	A	Rabbit	Cornea	Fibroblast	Adult	L	24	1	MTT	TetrazoliumSalt		97.8		35	10.5487/TR.2019.35.3.287
946	2019	CeO2	I	Sphere	None	Commercial		33		299			SIRC	60000	A	Rabbit	Cornea	Fibroblast	Adult	L	24	10	MTT	TetrazoliumSalt		97.8		35	10.5487/TR.2019.35.3.287
947	2019	CeO2	I	Sphere	None	Commercial		33		299			SIRC	60000	A	Rabbit	Cornea	Fibroblast	Adult	L	24	12.5	MTT	TetrazoliumSalt		95.77		35	10.5487/TR.2019.35.3.287
948	2019	CeO2	I	Sphere	None	Commercial		33		299			SIRC	60000	A	Rabbit	Cornea	Fibroblast	Adult	L	24	25	MTT	TetrazoliumSalt		95.77		35	10.5487/TR.2019.35.3.287
949	2019	CeO2	I	Sphere	None	Commercial		33		299			SIRC	60000	A	Rabbit	Cornea	Fibroblast	Adult	L	24	50	MTT	TetrazoliumSalt		95.601		35	10.5487/TR.2019.35.3.287
950	2019	CeO2	I	Sphere	None	Commercial		33		299			SIRC	60000	A	Rabbit	Cornea	Fibroblast	Adult	L	24	100	MTT	TetrazoliumSalt		92.555		35	10.5487/TR.2019.35.3.287
951	2019	Ag	I	Sphere	None	Commercial		16.7		129.7			SIRC	60000	A	Rabbit	Cornea	Fibroblast	Adult	L	24	1	MTT	TetrazoliumSalt		95.601		35	10.5487/TR.2019.35.3.287
952	2019	Ag	I	Sphere	None	Commercial		16.7		129.7			SIRC	60000	A	Rabbit	Cornea	Fibroblast	Adult	L	24	10	MTT	TetrazoliumSalt		93.232		35	10.5487/TR.2019.35.3.287
953	2019	Ag	I	Sphere	None	Commercial		16.7		129.7			SIRC	60000	A	Rabbit	Cornea	Fibroblast	Adult	L	24	12.5	MTT	TetrazoliumSalt		92.047		35	10.5487/TR.2019.35.3.287
954	2019	Ag	I	Sphere	None	Commercial		16.7		129.7			SIRC	60000	A	Rabbit	Cornea	Fibroblast	Adult	L	24	25	MTT	TetrazoliumSalt		91.709		35	10.5487/TR.2019.35.3.287
955	2019	Ag	I	Sphere	None	Commercial		16.7		129.7			SIRC	60000	A	Rabbit	Cornea	Fibroblast	Adult	L	24	50	MTT	TetrazoliumSalt		87.817		35	10.5487/TR.2019.35.3.287
956	2019	Ag	I	Sphere	None	Commercial		16.7		129.7			SIRC	60000	A	Rabbit	Cornea	Fibroblast	Adult	L	24	100	MTT	TetrazoliumSalt		72.927		35	10.5487/TR.2019.35.3.287
957	2019	ZnO	I	Sphere	None	Commercial		141		404			SIRC	60000	A	Rabbit	Cornea	Fibroblast	Adult	L	3	1	MTT	TetrazoliumSalt		97.504		35	10.5487/TR.2019.35.3.287
958	2019	ZnO	I	Sphere	None	Commercial		141		404			SIRC	60000	A	Rabbit	Cornea	Fibroblast	Adult	L	3	10	MTT	TetrazoliumSalt		94.54		35	10.5487/TR.2019.35.3.287
959	2019	ZnO	I	Sphere	None	Commercial		141		404			SIRC	60000	A	Rabbit	Cornea	Fibroblast	Adult	L	3	12.5	MTT	TetrazoliumSalt		89.392		35	10.5487/TR.2019.35.3.287
960	2019	ZnO	I	Sphere	None	Commercial		141		404			SIRC	60000	A	Rabbit	Cornea	Fibroblast	Adult	L	3	25	MTT	TetrazoliumSalt		87.52		35	10.5487/TR.2019.35.3.287
961	2019	ZnO	I	Sphere	None	Commercial		141		404			SIRC	60000	A	Rabbit	Cornea	Fibroblast	Adult	L	3	50	MTT	TetrazoliumSalt		80.187		35	10.5487/TR.2019.35.3.287
962	2019	ZnO	I	Sphere	None	Commercial		141		404			SIRC	60000	A	Rabbit	Cornea	Fibroblast	Adult	L	3	100	MTT	TetrazoliumSalt		72.075		35	10.5487/TR.2019.35.3.287
963	2019	ZnO	I	Sphere	None	Commercial		141		404			SIRC	60000	A	Rabbit	Cornea	Fibroblast	Adult	L	6	1	MTT	TetrazoliumSalt		96.568		35	10.5487/TR.2019.35.3.287
964	2019	ZnO	I	Sphere	None	Commercial		141		404			SIRC	60000	A	Rabbit	Cornea	Fibroblast	Adult	L	6	10	MTT	TetrazoliumSalt		92.356		35	10.5487/TR.2019.35.3.287
965	2019	ZnO	I	Sphere	None	Commercial		141		404			SIRC	60000	A	Rabbit	Cornea	Fibroblast	Adult	L	6	12.5	MTT	TetrazoliumSalt		87.207		35	10.5487/TR.2019.35.3.287
966	2019	ZnO	I	Sphere	None	Commercial		141		404			SIRC	60000	A	Rabbit	Cornea	Fibroblast	Adult	L	6	25	MTT	TetrazoliumSalt		83.151		35	10.5487/TR.2019.35.3.287
967	2019	ZnO	I	Sphere	None	Commercial		141		404			SIRC	60000	A	Rabbit	Cornea	Fibroblast	Adult	L	6	50	MTT	TetrazoliumSalt		66.615		35	10.5487/TR.2019.35.3.287
968	2019	ZnO	I	Sphere	None	Commercial		141		404			SIRC	60000	A	Rabbit	Cornea	Fibroblast	Adult	L	6	100	MTT	TetrazoliumSalt		61.622		35	10.5487/TR.2019.35.3.287
969	2019	ZnO	I	Sphere	None	Commercial		141		404			SIRC	60000	A	Rabbit	Cornea	Fibroblast	Adult	L	9	1	MTT	TetrazoliumSalt		96.1		35	10.5487/TR.2019.35.3.287
970	2019	ZnO	I	Sphere	None	Commercial		141		404			SIRC	60000	A	Rabbit	Cornea	Fibroblast	Adult	L	9	10	MTT	TetrazoliumSalt		88.456		35	10.5487/TR.2019.35.3.287
971	2019	ZnO	I	Sphere	None	Commercial		141		404			SIRC	60000	A	Rabbit	Cornea	Fibroblast	Adult	L	9	12.5	MTT	TetrazoliumSalt		80.655		35	10.5487/TR.2019.35.3.287
972	2019	ZnO	I	Sphere	None	Commercial		141		404			SIRC	60000	A	Rabbit	Cornea	Fibroblast	Adult	L	9	25	MTT	TetrazoliumSalt		70.671		35	10.5487/TR.2019.35.3.287
973	2019	ZnO	I	Sphere	None	Commercial		141		404			SIRC	60000	A	Rabbit	Cornea	Fibroblast	Adult	L	9	50	MTT	TetrazoliumSalt		49.922		35	10.5487/TR.2019.35.3.287
974	2019	ZnO	I	Sphere	None	Commercial		141		404			SIRC	60000	A	Rabbit	Cornea	Fibroblast	Adult	L	9	100	MTT	TetrazoliumSalt		39.938		35	10.5487/TR.2019.35.3.287
975	2019	ZnO	I	Sphere	None	Commercial		141		404			SIRC	60000	A	Rabbit	Cornea	Fibroblast	Adult	L	12	1	MTT	TetrazoliumSalt		91.888		35	10.5487/TR.2019.35.3.287
976	2019	ZnO	I	Sphere	None	Commercial		141		404			SIRC	60000	A	Rabbit	Cornea	Fibroblast	Adult	L	12	10	MTT	TetrazoliumSalt		84.867		35	10.5487/TR.2019.35.3.287
977	2019	ZnO	I	Sphere	None	Commercial		141		404			SIRC	60000	A	Rabbit	Cornea	Fibroblast	Adult	L	12	12.5	MTT	TetrazoliumSalt		61.154		35	10.5487/TR.2019.35.3.287
978	2019	ZnO	I	Sphere	None	Commercial		141		404			SIRC	60000	A	Rabbit	Cornea	Fibroblast	Adult	L	12	25	MTT	TetrazoliumSalt		42.122		35	10.5487/TR.2019.35.3.287
979	2019	ZnO	I	Sphere	None	Commercial		141		404			SIRC	60000	A	Rabbit	Cornea	Fibroblast	Adult	L	12	50	MTT	TetrazoliumSalt		27.613		35	10.5487/TR.2019.35.3.287
980	2019	ZnO	I	Sphere	None	Commercial		141		404			SIRC	60000	A	Rabbit	Cornea	Fibroblast	Adult	L	12	100	MTT	TetrazoliumSalt		22.153		35	10.5487/TR.2019.35.3.287
981	2015	Au	I	Sphere	None	Commercial		30	46.7	70.4			NHDF	50000	H	Human	Skin	Fibroblast	Adult	L	24	1	MTT	TetrazoliumSalt		98.604		36	10.1080/17458080.2015.1014934
982	2015	Au	I	Sphere	None	Commercial		30	46.7	70.4			NHDF	50000	H	Human	Skin	Fibroblast	Adult	L	24	5	MTT	TetrazoliumSalt		81.98		36	10.1080/17458080.2015.1014934
983	2015	Au	I	Sphere	None	Commercial		30	46.7	70.4			NHDF	50000	H	Human	Skin	Fibroblast	Adult	L	24	10	MTT	TetrazoliumSalt		77.919		36	10.1080/17458080.2015.1014934
984	2015	Au	I	Sphere	None	Commercial		30	46.7	70.4			NHDF	50000	H	Human	Skin	Fibroblast	Adult	L	24	15	MTT	TetrazoliumSalt		68.655		36	10.1080/17458080.2015.1014934
985	2015	Au	I	Sphere	None	Commercial		30	46.7	70.4			NHDF	50000	H	Human	Skin	Fibroblast	Adult	L	24	25	MTT	TetrazoliumSalt		6.599		36	10.1080/17458080.2015.1014934
986	2015	Au	I	Sphere	None	Commercial		50	53.3	96.3			NHDF	50000	H	Human	Skin	Fibroblast	Adult	L	24	1	MTT	TetrazoliumSalt		98.858		36	10.1080/17458080.2015.1014934
987	2015	Au	I	Sphere	None	Commercial		50	53.3	96.3			NHDF	50000	H	Human	Skin	Fibroblast	Adult	L	24	5	MTT	TetrazoliumSalt		84.264		36	10.1080/17458080.2015.1014934
988	2015	Au	I	Sphere	None	Commercial		50	53.3	96.3			NHDF	50000	H	Human	Skin	Fibroblast	Adult	L	24	10	MTT	TetrazoliumSalt		80.457		36	10.1080/17458080.2015.1014934
989	2015	Au	I	Sphere	None	Commercial		50	53.3	96.3			NHDF	50000	H	Human	Skin	Fibroblast	Adult	L	24	15	MTT	TetrazoliumSalt		68.782		36	10.1080/17458080.2015.1014934
990	2015	Au	I	Sphere	None	Commercial		50	53.3	96.3			NHDF	50000	H	Human	Skin	Fibroblast	Adult	L	24	25	MTT	TetrazoliumSalt		7.2335		36	10.1080/17458080.2015.1014934
991	2015	Au	I	Sphere	None	Commercial		90	90.6	125.1			NHDF	50000	H	Human	Skin	Fibroblast	Adult	L	24	1	MTT	TetrazoliumSalt		99.629		36	10.1080/17458080.2015.1014934
992	2015	Au	I	Sphere	None	Commercial		90	90.6	125.1			NHDF	50000	H	Human	Skin	Fibroblast	Adult	L	24	5	MTT	TetrazoliumSalt		90.853		36	10.1080/17458080.2015.1014934
993	2015	Au	I	Sphere	None	Commercial		90	90.6	125.1			NHDF	50000	H	Human	Skin	Fibroblast	Adult	L	24	10	MTT	TetrazoliumSalt		87.639		36	10.1080/17458080.2015.1014934
994	2015	Au	I	Sphere	None	Commercial		90	90.6	125.1			NHDF	50000	H	Human	Skin	Fibroblast	Adult	L	24	15	MTT	TetrazoliumSalt		72.93		36	10.1080/17458080.2015.1014934
995	2015	Au	I	Sphere	None	Commercial		90	90.6	125.1			NHDF	50000	H	Human	Skin	Fibroblast	Adult	L	24	25	MTT	TetrazoliumSalt		19.778		36	10.1080/17458080.2015.1014934
996	2015	Au	I	Sphere	None	Commercial		30	46.7	70.4			NHDF	50000	H	Human	Skin	Fibroblast	Adult	L	48	1	MTT	TetrazoliumSalt		96.701		36	10.1080/17458080.2015.1014934
997	2015	Au	I	Sphere	None	Commercial		30	46.7	70.4			NHDF	50000	H	Human	Skin	Fibroblast	Adult	L	48	5	MTT	TetrazoliumSalt		80.584		36	10.1080/17458080.2015.1014934
998	2015	Au	I	Sphere	None	Commercial		30	46.7	70.4			NHDF	50000	H	Human	Skin	Fibroblast	Adult	L	48	10	MTT	TetrazoliumSalt		77.284		36	10.1080/17458080.2015.1014934
999	2015	Au	I	Sphere	None	Commercial		30	46.7	70.4			NHDF	50000	H	Human	Skin	Fibroblast	Adult	L	48	15	MTT	TetrazoliumSalt		67.386		36	10.1080/17458080.2015.1014934
1000	2015	Au	I	Sphere	None	Commercial		30	46.7	70.4			NHDF	50000	H	Human	Skin	Fibroblast	Adult	L	48	25	MTT	TetrazoliumSalt		5.7107		36	10.1080/17458080.2015.1014934
1001	2015	Au	I	Sphere	None	Commercial		50	53.3	96.3			NHDF	50000	H	Human	Skin	Fibroblast	Adult	L	48	1	MTT	TetrazoliumSalt		97.462		36	10.1080/17458080.2015.1014934
1002	2015	Au	I	Sphere	None	Commercial		50	53.3	96.3			NHDF	50000	H	Human	Skin	Fibroblast	Adult	L	48	5	MTT	TetrazoliumSalt		83.122		36	10.1080/17458080.2015.1014934
1003	2015	Au	I	Sphere	None	Commercial		50	53.3	96.3			NHDF	50000	H	Human	Skin	Fibroblast	Adult	L	48	10	MTT	TetrazoliumSalt		77.284		36	10.1080/17458080.2015.1014934
1004	2015	Au	I	Sphere	None	Commercial		50	53.3	96.3			NHDF	50000	H	Human	Skin	Fibroblast	Adult	L	48	15	MTT	TetrazoliumSalt		68.401		36	10.1080/17458080.2015.1014934
1005	2015	Au	I	Sphere	None	Commercial		50	53.3	96.3			NHDF	50000	H	Human	Skin	Fibroblast	Adult	L	48	25	MTT	TetrazoliumSalt		7.1066		36	10.1080/17458080.2015.1014934
1006	2015	Au	I	Sphere	None	Commercial		90	90.6	125.1			NHDF	50000	H	Human	Skin	Fibroblast	Adult	L	48	1	MTT	TetrazoliumSalt		99.135		36	10.1080/17458080.2015.1014934
1007	2015	Au	I	Sphere	None	Commercial		90	90.6	125.1			NHDF	50000	H	Human	Skin	Fibroblast	Adult	L	48	5	MTT	TetrazoliumSalt		85.909		36	10.1080/17458080.2015.1014934
1008	2015	Au	I	Sphere	None	Commercial		90	90.6	125.1			NHDF	50000	H	Human	Skin	Fibroblast	Adult	L	48	10	MTT	TetrazoliumSalt		81.459		36	10.1080/17458080.2015.1014934
1009	2015	Au	I	Sphere	None	Commercial		90	90.6	125.1			NHDF	50000	H	Human	Skin	Fibroblast	Adult	L	48	15	MTT	TetrazoliumSalt		71.199		36	10.1080/17458080.2015.1014934
1010	2015	Au	I	Sphere	None	Commercial		90	90.6	125.1			NHDF	50000	H	Human	Skin	Fibroblast	Adult	L	48	25	MTT	TetrazoliumSalt		13.226		36	10.1080/17458080.2015.1014934
1011	2015	Au	I	Sphere	None	Commercial		30	46.7	70.4			NHDF	50000	H	Human	Skin	Fibroblast	Adult	L	72	1	MTT	TetrazoliumSalt		96.193		36	10.1080/17458080.2015.1014934
1012	2015	Au	I	Sphere	None	Commercial		30	46.7	70.4			NHDF	50000	H	Human	Skin	Fibroblast	Adult	L	72	5	MTT	TetrazoliumSalt		80.584		36	10.1080/17458080.2015.1014934
1013	2015	Au	I	Sphere	None	Commercial		30	46.7	70.4			NHDF	50000	H	Human	Skin	Fibroblast	Adult	L	72	10	MTT	TetrazoliumSalt		74.112		36	10.1080/17458080.2015.1014934
1014	2015	Au	I	Sphere	None	Commercial		30	46.7	70.4			NHDF	50000	H	Human	Skin	Fibroblast	Adult	L	72	15	MTT	TetrazoliumSalt		65.609		36	10.1080/17458080.2015.1014934
1015	2015	Au	I	Sphere	None	Commercial		30	46.7	70.4			NHDF	50000	H	Human	Skin	Fibroblast	Adult	L	72	25	MTT	TetrazoliumSalt		5.4569		36	10.1080/17458080.2015.1014934
1016	2015	Au	I	Sphere	None	Commercial		50	53.3	96.3			NHDF	50000	H	Human	Skin	Fibroblast	Adult	L	72	1	MTT	TetrazoliumSalt		96.701		36	10.1080/17458080.2015.1014934
1017	2015	Au	I	Sphere	None	Commercial		50	53.3	96.3			NHDF	50000	H	Human	Skin	Fibroblast	Adult	L	72	5	MTT	TetrazoliumSalt		82.487		36	10.1080/17458080.2015.1014934
1018	2015	Au	I	Sphere	None	Commercial		50	53.3	96.3			NHDF	50000	H	Human	Skin	Fibroblast	Adult	L	72	10	MTT	TetrazoliumSalt		77.03		36	10.1080/17458080.2015.1014934
1019	2015	Au	I	Sphere	None	Commercial		50	53.3	96.3			NHDF	50000	H	Human	Skin	Fibroblast	Adult	L	72	15	MTT	TetrazoliumSalt		66.117		36	10.1080/17458080.2015.1014934
1020	2015	Au	I	Sphere	None	Commercial		50	53.3	96.3			NHDF	50000	H	Human	Skin	Fibroblast	Adult	L	72	25	MTT	TetrazoliumSalt		7.1066		36	10.1080/17458080.2015.1014934
1021	2015	Au	I	Sphere	None	Commercial		90	90.6	125.1			NHDF	50000	H	Human	Skin	Fibroblast	Adult	L	72	1	MTT	TetrazoliumSalt		97.775		36	10.1080/17458080.2015.1014934
1022	2015	Au	I	Sphere	None	Commercial		90	90.6	125.1			NHDF	50000	H	Human	Skin	Fibroblast	Adult	L	72	5	MTT	TetrazoliumSalt		84.92		36	10.1080/17458080.2015.1014934
1023	2015	Au	I	Sphere	None	Commercial		90	90.6	125.1			NHDF	50000	H	Human	Skin	Fibroblast	Adult	L	72	10	MTT	TetrazoliumSalt		81.459		36	10.1080/17458080.2015.1014934
1024	2015	Au	I	Sphere	None	Commercial		90	90.6	125.1			NHDF	50000	H	Human	Skin	Fibroblast	Adult	L	72	15	MTT	TetrazoliumSalt		68.356		36	10.1080/17458080.2015.1014934
1025	2015	Au	I	Sphere	None	Commercial		90	90.6	125.1			NHDF	50000	H	Human	Skin	Fibroblast	Adult	L	72	25	MTT	TetrazoliumSalt		13.226		36	10.1080/17458080.2015.1014934
1026	2019	Au	I	Sphere	Chitosan	Green Synthesis	Positive	8.7	190.7		42.28		AGS	5000	H	Human	Stomach	Epithelial	Adult	L	24		MTT	TetrazoliumSalt		79.57		37	10.1186/s11671-019-2967-1
1027	2019	Au	I	Sphere	Chitosan	Green Synthesis	Positive	8.7	190.7		42.28		AGS	5000	H	Human	Stomach	Epithelial	Adult	L	24		MTT	TetrazoliumSalt		80.645		37	10.1186/s11671-019-2967-1
1028	2019	Au	I	Sphere	Chitosan	Green Synthesis	Positive	8.7	190.7		42.28		AGS	5000	H	Human	Stomach	Epithelial	Adult	L	24		MTT	TetrazoliumSalt		82.437		37	10.1186/s11671-019-2967-1
1029	2019	Au	I	Sphere	Chitosan	Green Synthesis	Positive	8.7	190.7		42.28		AGS	5000	H	Human	Stomach	Epithelial	Adult	L	24		MTT	TetrazoliumSalt		82.079		37	10.1186/s11671-019-2967-1
1030	2019	Au	I	Sphere	Chitosan	Green Synthesis	Positive	8.7	190.7		42.28		AGS	5000	H	Human	Stomach	Epithelial	Adult	L	24		MTT	TetrazoliumSalt		70.968		37	10.1186/s11671-019-2967-1
1031	2019	Au	I	Star	Chitosan	Green Synthesis	Positive	99	123.9		47.44		AGS	5000	H	Human	Stomach	Epithelial	Adult	L	24		MTT	TetrazoliumSalt		88.53		37	10.1186/s11671-019-2967-1
1032	2019	Au	I	Star	Chitosan	Green Synthesis	Positive	99	123.9		47.44		AGS	5000	H	Human	Stomach	Epithelial	Adult	L	24		MTT	TetrazoliumSalt		89.068		37	10.1186/s11671-019-2967-1
1033	2019	Au	I	Star	Chitosan	Green Synthesis	Positive	99	123.9		47.44		AGS	5000	H	Human	Stomach	Epithelial	Adult	L	24		MTT	TetrazoliumSalt		85.484		37	10.1186/s11671-019-2967-1
1034	2019	Au	I	Star	Chitosan	Green Synthesis	Positive	99	123.9		47.44		AGS	5000	H	Human	Stomach	Epithelial	Adult	L	24		MTT	TetrazoliumSalt		78.495		37	10.1186/s11671-019-2967-1
1035	2019	Au	I	Star	Chitosan	Green Synthesis	Positive	99	123.9		47.44		AGS	5000	H	Human	Stomach	Epithelial	Adult	L	24		MTT	TetrazoliumSalt		48.746		37	10.1186/s11671-019-2967-1
1036	2019	Au	I	Rod	Chitosan	Seed-Mediated Growth Method	Positive				33.23		AGS	5000	H	Human	Stomach	Epithelial	Adult	L	24		MTT	TetrazoliumSalt	3.7	17.921		37	10.1186/s11671-019-2967-1
1037	2019	Au	I	Rod	Chitosan	Seed-Mediated Growth Method	Positive				33.23		AGS	5000	H	Human	Stomach	Epithelial	Adult	L	24		MTT	TetrazoliumSalt	3.7	19.176		37	10.1186/s11671-019-2967-1
1038	2019	Au	I	Rod	Chitosan	Seed-Mediated Growth Method	Positive				33.23		AGS	5000	H	Human	Stomach	Epithelial	Adult	L	24		MTT	TetrazoliumSalt	3.7	19.534		37	10.1186/s11671-019-2967-1
1039	2019	Au	I	Rod	Chitosan	Seed-Mediated Growth Method	Positive				33.23		AGS	5000	H	Human	Stomach	Epithelial	Adult	L	24		MTT	TetrazoliumSalt	3.7	21.326		37	10.1186/s11671-019-2967-1
1040	2019	Au	I	Rod	Chitosan	Seed-Mediated Growth Method	Positive				33.23		AGS	5000	H	Human	Stomach	Epithelial	Adult	L	24		MTT	TetrazoliumSalt	3.7	3.7634		37	10.1186/s11671-019-2967-1
1041	2019	Au	I	Sphere	Chitosan	Green Synthesis	Positive	8.7	190.7		42.28		HeLa	5000	H	Human	Cervix	Epithelial	Adult	L	24		MTT	TetrazoliumSalt		107.26		37	10.1186/s11671-019-2967-1
1042	2019	Au	I	Sphere	Chitosan	Green Synthesis	Positive	8.7	190.7		42.28		HeLa	5000	H	Human	Cervix	Epithelial	Adult	L	24		MTT	TetrazoliumSalt		101.59		37	10.1186/s11671-019-2967-1
1043	2019	Au	I	Sphere	Chitosan	Green Synthesis	Positive	8.7	190.7		42.28		HeLa	5000	H	Human	Cervix	Epithelial	Adult	L	24		MTT	TetrazoliumSalt		98.761		37	10.1186/s11671-019-2967-1
1044	2019	Au	I	Sphere	Chitosan	Green Synthesis	Positive	8.7	190.7		42.28		HeLa	5000	H	Human	Cervix	Epithelial	Adult	L	24		MTT	TetrazoliumSalt		85.664		37	10.1186/s11671-019-2967-1
1045	2019	Au	I	Sphere	Chitosan	Green Synthesis	Positive	8.7	190.7		42.28		HeLa	5000	H	Human	Cervix	Epithelial	Adult	L	24		MTT	TetrazoliumSalt		67.257		37	10.1186/s11671-019-2967-1
1046	2019	Au	I	Star	Chitosan	Green Synthesis	Positive	99	123.9		47.44		HeLa	5000	H	Human	Cervix	Epithelial	Adult	L	24		MTT	TetrazoliumSalt		84.779		37	10.1186/s11671-019-2967-1
1047	2019	Au	I	Star	Chitosan	Green Synthesis	Positive	99	123.9		47.44		HeLa	5000	H	Human	Cervix	Epithelial	Adult	L	24		MTT	TetrazoliumSalt		83.54		37	10.1186/s11671-019-2967-1
1048	2019	Au	I	Star	Chitosan	Green Synthesis	Positive	99	123.9		47.44		HeLa	5000	H	Human	Cervix	Epithelial	Adult	L	24		MTT	TetrazoliumSalt		76.637		37	10.1186/s11671-019-2967-1
1049	2019	Au	I	Star	Chitosan	Green Synthesis	Positive	99	123.9		47.44		HeLa	5000	H	Human	Cervix	Epithelial	Adult	L	24		MTT	TetrazoliumSalt		60.885		37	10.1186/s11671-019-2967-1
1050	2019	Au	I	Star	Chitosan	Green Synthesis	Positive	99	123.9		47.44		HeLa	5000	H	Human	Cervix	Epithelial	Adult	L	24		MTT	TetrazoliumSalt		34.69		37	10.1186/s11671-019-2967-1
1051	2019	Au	I	Rod	Chitosan	Seed-Mediated Growth Method	Positive				33.23		HeLa	5000	H	Human	Cervix	Epithelial	Adult	L	24		MTT	TetrazoliumSalt	3.7	5.4867		37	10.1186/s11671-019-2967-1
1052	2019	Au	I	Rod	Chitosan	Seed-Mediated Growth Method	Positive				33.23		HeLa	5000	H	Human	Cervix	Epithelial	Adult	L	24		MTT	TetrazoliumSalt	3.7	5.4867		37	10.1186/s11671-019-2967-1
1053	2019	Au	I	Rod	Chitosan	Seed-Mediated Growth Method	Positive				33.23		HeLa	5000	H	Human	Cervix	Epithelial	Adult	L	24		MTT	TetrazoliumSalt	3.7	5.4867		37	10.1186/s11671-019-2967-1
1054	2019	Au	I	Rod	Chitosan	Seed-Mediated Growth Method	Positive				33.23		HeLa	5000	H	Human	Cervix	Epithelial	Adult	L	24		MTT	TetrazoliumSalt	3.7	4.2478		37	10.1186/s11671-019-2967-1
1055	2019	Au	I	Rod	Chitosan	Seed-Mediated Growth Method	Positive				33.23		HeLa	5000	H	Human	Cervix	Epithelial	Adult	L	24		MTT	TetrazoliumSalt	3.7	4.2478		37	10.1186/s11671-019-2967-1
1056	2019	Au	I	Sphere	Chitosan	Green Synthesis	Positive	8.7	190.7		42.28		HepG2	5000	H	Human	Liver	Epithelial	Adult	L	24		MTT	TetrazoliumSalt		71.45		37	10.1186/s11671-019-2967-1
1057	2019	Au	I	Sphere	Chitosan	Green Synthesis	Positive	8.7	190.7		42.28		HepG2	5000	H	Human	Liver	Epithelial	Adult	L	24		MTT	TetrazoliumSalt		63.976		37	10.1186/s11671-019-2967-1
1058	2019	Au	I	Sphere	Chitosan	Green Synthesis	Positive	8.7	190.7		42.28		HepG2	5000	H	Human	Liver	Epithelial	Adult	L	24		MTT	TetrazoliumSalt		50.673		37	10.1186/s11671-019-2967-1
1059	2019	Au	I	Sphere	Chitosan	Green Synthesis	Positive	8.7	190.7		42.28		HepG2	5000	H	Human	Liver	Epithelial	Adult	L	24		MTT	TetrazoliumSalt		46.637		37	10.1186/s11671-019-2967-1
1060	2019	Au	I	Sphere	Chitosan	Green Synthesis	Positive	8.7	190.7		42.28		HepG2	5000	H	Human	Liver	Epithelial	Adult	L	24		MTT	TetrazoliumSalt		36.921		37	10.1186/s11671-019-2967-1
1061	2019	Au	I	Star	Chitosan	Green Synthesis	Positive	99	123.9		47.44		HepG2	5000	H	Human	Liver	Epithelial	Adult	L	24		MTT	TetrazoliumSalt		60.538		37	10.1186/s11671-019-2967-1
1062	2019	Au	I	Star	Chitosan	Green Synthesis	Positive	99	123.9		47.44		HepG2	5000	H	Human	Liver	Epithelial	Adult	L	24		MTT	TetrazoliumSalt		59.791		37	10.1186/s11671-019-2967-1
1063	2019	Au	I	Star	Chitosan	Green Synthesis	Positive	99	123.9		47.44		HepG2	5000	H	Human	Liver	Epithelial	Adult	L	24		MTT	TetrazoliumSalt		31.54		37	10.1186/s11671-019-2967-1
1064	2019	Au	I	Star	Chitosan	Green Synthesis	Positive	99	123.9		47.44		HepG2	5000	H	Human	Liver	Epithelial	Adult	L	24		MTT	TetrazoliumSalt		1.9432		37	10.1186/s11671-019-2967-1
1065	2019	Au	I	Star	Chitosan	Green Synthesis	Positive	99	123.9		47.44		HepG2	5000	H	Human	Liver	Epithelial	Adult	L	24		MTT	TetrazoliumSalt		3.5874		37	10.1186/s11671-019-2967-1
1066	2019	Au	I	Rod	Chitosan	Seed-Mediated Growth Method	Positive				33.23		HepG2	5000	H	Human	Liver	Epithelial	Adult	L	24		MTT	TetrazoliumSalt	3.7	4.6338		37	10.1186/s11671-019-2967-1
1067	2019	Au	I	Rod	Chitosan	Seed-Mediated Growth Method	Positive				33.23		HepG2	5000	H	Human	Liver	Epithelial	Adult	L	24		MTT	TetrazoliumSalt	3.7	4.0359		37	10.1186/s11671-019-2967-1
1068	2019	Au	I	Rod	Chitosan	Seed-Mediated Growth Method	Positive				33.23		HepG2	5000	H	Human	Liver	Epithelial	Adult	L	24		MTT	TetrazoliumSalt	3.7	2.9895		37	10.1186/s11671-019-2967-1
1069	2019	Au	I	Rod	Chitosan	Seed-Mediated Growth Method	Positive				33.23		HepG2	5000	H	Human	Liver	Epithelial	Adult	L	24		MTT	TetrazoliumSalt	3.7	1.3453		37	10.1186/s11671-019-2967-1
1070	2019	Au	I	Rod	Chitosan	Seed-Mediated Growth Method	Positive				33.23		HepG2	5000	H	Human	Liver	Epithelial	Adult	L	24		MTT	TetrazoliumSalt	3.7	1.1958		37	10.1186/s11671-019-2967-1
1071	2019	Au	I	Sphere	Chitosan	Green Synthesis	Positive	8.7	190.7		42.28		HT29	5000	H	Human	Colon	Epithelial	Adult	L	24		MTT	TetrazoliumSalt		97.369		37	10.1186/s11671-019-2967-1
1072	2019	Au	I	Sphere	Chitosan	Green Synthesis	Positive	8.7	190.7		42.28		HT29	5000	H	Human	Colon	Epithelial	Adult	L	24		MTT	TetrazoliumSalt		95.658		37	10.1186/s11671-019-2967-1
1073	2019	Au	I	Sphere	Chitosan	Green Synthesis	Positive	8.7	190.7		42.28		HT29	5000	H	Human	Colon	Epithelial	Adult	L	24		MTT	TetrazoliumSalt		93.756		37	10.1186/s11671-019-2967-1
1074	2019	Au	I	Sphere	Chitosan	Green Synthesis	Positive	8.7	190.7		42.28		HT29	5000	H	Human	Colon	Epithelial	Adult	L	24		MTT	TetrazoliumSalt		92.805		37	10.1186/s11671-019-2967-1
1075	2019	Au	I	Sphere	Chitosan	Green Synthesis	Positive	8.7	190.7		42.28		HT29	5000	H	Human	Colon	Epithelial	Adult	L	24		MTT	TetrazoliumSalt		75.689		37	10.1186/s11671-019-2967-1
1076	2019	Au	I	Star	Chitosan	Green Synthesis	Positive	99	123.9		47.44		HT29	5000	H	Human	Colon	Epithelial	Adult	L	24		MTT	TetrazoliumSalt		99.271		37	10.1186/s11671-019-2967-1
1077	2019	Au	I	Star	Chitosan	Green Synthesis	Positive	99	123.9		47.44		HT29	5000	H	Human	Colon	Epithelial	Adult	L	24		MTT	TetrazoliumSalt		96.038		37	10.1186/s11671-019-2967-1
1078	2019	Au	I	Star	Chitosan	Green Synthesis	Positive	99	123.9		47.44		HT29	5000	H	Human	Colon	Epithelial	Adult	L	24		MTT	TetrazoliumSalt		89.952		37	10.1186/s11671-019-2967-1
1079	2019	Au	I	Star	Chitosan	Green Synthesis	Positive	99	123.9		47.44		HT29	5000	H	Human	Colon	Epithelial	Adult	L	24		MTT	TetrazoliumSalt		82.536		37	10.1186/s11671-019-2967-1
1080	2019	Au	I	Star	Chitosan	Green Synthesis	Positive	99	123.9		47.44		HT29	5000	H	Human	Colon	Epithelial	Adult	L	24		MTT	TetrazoliumSalt		48.875		37	10.1186/s11671-019-2967-1
1081	2019	Au	I	Rod	Chitosan	Seed-Mediated Growth Method	Positive				33.23		HT29	5000	H	Human	Colon	Epithelial	Adult	L	24		MTT	TetrazoliumSalt	3.7	3.4231		37	10.1186/s11671-019-2967-1
1082	2019	Au	I	Rod	Chitosan	Seed-Mediated Growth Method	Positive				33.23		HT29	5000	H	Human	Colon	Epithelial	Adult	L	24		MTT	TetrazoliumSalt	3.7	3.4231		37	10.1186/s11671-019-2967-1
1083	2019	Au	I	Rod	Chitosan	Seed-Mediated Growth Method	Positive				33.23		HT29	5000	H	Human	Colon	Epithelial	Adult	L	24		MTT	TetrazoliumSalt	3.7	3.0428		37	10.1186/s11671-019-2967-1
1084	2019	Au	I	Rod	Chitosan	Seed-Mediated Growth Method	Positive				33.23		HT29	5000	H	Human	Colon	Epithelial	Adult	L	24		MTT	TetrazoliumSalt	3.7	1.9017		37	10.1186/s11671-019-2967-1
1085	2019	Au	I	Rod	Chitosan	Seed-Mediated Growth Method	Positive				33.23		HT29	5000	H	Human	Colon	Epithelial	Adult	L	24		MTT	TetrazoliumSalt	3.7	2.2821		37	10.1186/s11671-019-2967-1
1086	2019	Au	I	Rod	Chitosan	Seed-Mediated Growth Method	Positive				33.23		HepG2	5000	H	Human	Liver	Epithelial	Adult	L	24		MTT	TetrazoliumSalt	3.7	93.237		37	10.1186/s11671-019-2967-1
1087	2019	Au	I	Rod	Chitosan	Seed-Mediated Growth Method	Positive				33.23		HepG2	5000	H	Human	Liver	Epithelial	Adult	L	24		MTT	TetrazoliumSalt	3.7	74.101		37	10.1186/s11671-019-2967-1
1088	2019	Au	I	Rod	Chitosan	Seed-Mediated Growth Method	Positive				33.23		HepG2	5000	H	Human	Liver	Epithelial	Adult	L	24		MTT	TetrazoliumSalt	3.7	20.144		37	10.1186/s11671-019-2967-1
1089	2019	Au	I	Rod	Chitosan	Seed-Mediated Growth Method	Positive				33.23		HepG2	5000	H	Human	Liver	Epithelial	Adult	L	24		MTT	TetrazoliumSalt	3.7	21.295		37	10.1186/s11671-019-2967-1
1090	2019	Au	I	Rod	Chitosan	Seed-Mediated Growth Method	Positive				33.23		HepG2	5000	H	Human	Liver	Epithelial	Adult	L	24		MTT	TetrazoliumSalt	3.7	15.108		37	10.1186/s11671-019-2967-1
1091	2015	Au	I	Rod	None	Commercial		25					A549	5000	H	Human	Lung	Epithelial	Adult	L	4	2.5	CCK-8	TetrazoliumSalt	2.1	96.783		38	10.1016/j.etap.2015.02.003
1092	2015	Au	I	Rod	None	Commercial		25					A549	5000	H	Human	Lung	Epithelial	Adult	L	4	5	CCK-8	TetrazoliumSalt	2.1	69.437		38	10.1016/j.etap.2015.02.003
1093	2015	Au	I	Rod	None	Commercial		25					A549	5000	H	Human	Lung	Epithelial	Adult	L	4	7.5	CCK-8	TetrazoliumSalt	2.1	21.716		38	10.1016/j.etap.2015.02.003
1094	2015	Au	I	Rod	None	Commercial		25					A549	5000	H	Human	Lung	Epithelial	Adult	L	4	10	CCK-8	TetrazoliumSalt	2.1	15.013		38	10.1016/j.etap.2015.02.003
1095	2015	Au	I	Rod	None	Commercial		25					A549	5000	H	Human	Lung	Epithelial	Adult	L	4	12.5	CCK-8	TetrazoliumSalt	2.1	7.7748		38	10.1016/j.etap.2015.02.003
1096	2015	Au	I	Rod	None	Commercial		25					A549	5000	H	Human	Lung	Epithelial	Adult	L	4	15	CCK-8	TetrazoliumSalt	2.1	6.9705		38	10.1016/j.etap.2015.02.003
1097	2014	Ag	I	Sphere	None	Commercial		90					Caco-2	10000	H	Human	Colon	Epithelial	Adult	L	24	10	CCK-8	TetrazoliumSalt		79.17		39	10.1016/j.mrfmmm.2014.08.001
1098	2014	Ag	I	Sphere	None	Commercial		90					Caco-2	10000	H	Human	Colon	Epithelial	Adult	L	24	25	CCK-8	TetrazoliumSalt		63.44		39	10.1016/j.mrfmmm.2014.08.001
1099	2014	Ag	I	Sphere	None	Commercial		90					Caco-2	10000	H	Human	Colon	Epithelial	Adult	L	24	50	CCK-8	TetrazoliumSalt		66.41		39	10.1016/j.mrfmmm.2014.08.001
1100	2014	Ag	I	Sphere	None	Commercial		90					Caco-2	10000	H	Human	Colon	Epithelial	Adult	L	24	100	CCK-8	TetrazoliumSalt		68.69		39	10.1016/j.mrfmmm.2014.08.001
1101	2014	Ag	I	Sphere	None	Commercial		90					Caco-2	10000	H	Human	Colon	Epithelial	Adult	L	24	200	CCK-8	TetrazoliumSalt		63.25		39	10.1016/j.mrfmmm.2014.08.001
1102	2014	ZnO	I	Sphere	None	Commercial		90					Caco-2	10000	H	Human	Colon	Epithelial	Adult	L	24	10	CCK-8	TetrazoliumSalt		27.99		39	10.1016/j.mrfmmm.2014.08.001
1103	2014	ZnO	I	Sphere	None	Commercial		90					Caco-2	10000	H	Human	Colon	Epithelial	Adult	L	24	25	CCK-8	TetrazoliumSalt		25.73		39	10.1016/j.mrfmmm.2014.08.001
1104	2014	ZnO	I	Sphere	None	Commercial		90					Caco-2	10000	H	Human	Colon	Epithelial	Adult	L	24	50	CCK-8	TetrazoliumSalt		18.21		39	10.1016/j.mrfmmm.2014.08.001
1105	2014	ZnO	I	Sphere	None	Commercial		90					Caco-2	10000	H	Human	Colon	Epithelial	Adult	L	24	100	CCK-8	TetrazoliumSalt		17.87		39	10.1016/j.mrfmmm.2014.08.001
1106	2014	ZnO	I	Sphere	None	Commercial		90					Caco-2	10000	H	Human	Colon	Epithelial	Adult	L	24	200	CCK-8	TetrazoliumSalt		14.34		39	10.1016/j.mrfmmm.2014.08.001
1107	2018	Ag	I	Sphere	None	Chemical Reduction	Negative	14.3	21.14	79.15	-26.5	-7.9	THP-1	10000	H	Human	Blood	Monocyte	Adult	L	24	0.3	AlamarBlue	AlamarBlue		85.833	0.23	40	10.1002/jat.3566
1108	2018	Ag	I	Sphere	None	Chemical Reduction	Negative	14.3	21.14	79.15	-26.5	-7.9	THP-1	10000	H	Human	Blood	Monocyte	Adult	L	24	0.625	AlamarBlue	AlamarBlue		88.333	0.23	40	10.1002/jat.3566
1109	2018	Ag	I	Sphere	None	Chemical Reduction	Negative	14.3	21.14	79.15	-26.5	-7.9	THP-1	10000	H	Human	Blood	Monocyte	Adult	L	24	1.25	AlamarBlue	AlamarBlue		87.222	0.23	40	10.1002/jat.3566
1110	2018	Ag	I	Sphere	None	Chemical Reduction	Negative	14.3	21.14	79.15	-26.5	-7.9	THP-1	10000	H	Human	Blood	Monocyte	Adult	L	24	2.5	AlamarBlue	AlamarBlue		88.611	0.23	40	10.1002/jat.3566
1111	2018	Ag	I	Sphere	None	Chemical Reduction	Negative	14.3	21.14	79.15	-26.5	-7.9	THP-1	10000	H	Human	Blood	Monocyte	Adult	L	24	5	AlamarBlue	AlamarBlue		44.167	0.23	40	10.1002/jat.3566
1112	2018	Ag	I	Sphere	Liposome	Chemical Reduction	Negative	82.73	140.1	138.9	-31.9	-0.61	THP-1	10000	H	Human	Blood	Monocyte	Adult	L	24	0.3	AlamarBlue	AlamarBlue		100.56	0.105	40	10.1002/jat.3566
1113	2018	Ag	I	Sphere	Liposome	Chemical Reduction	Negative	82.73	140.1	138.9	-31.9	-0.61	THP-1	10000	H	Human	Blood	Monocyte	Adult	L	24	0.625	AlamarBlue	AlamarBlue		100.83	0.105	40	10.1002/jat.3566
1114	2018	Ag	I	Sphere	Liposome	Chemical Reduction	Negative	82.73	140.1	138.9	-31.9	-0.61	THP-1	10000	H	Human	Blood	Monocyte	Adult	L	24	1.25	AlamarBlue	AlamarBlue		96.944	0.105	40	10.1002/jat.3566
1115	2018	Ag	I	Sphere	Liposome	Chemical Reduction	Negative	82.73	140.1	138.9	-31.9	-0.61	THP-1	10000	H	Human	Blood	Monocyte	Adult	L	24	2.5	AlamarBlue	AlamarBlue		73.889	0.105	40	10.1002/jat.3566
1116	2018	Ag	I	Sphere	Liposome	Chemical Reduction	Negative	82.73	140.1	138.9	-31.9	-0.61	THP-1	10000	H	Human	Blood	Monocyte	Adult	L	24	5	AlamarBlue	AlamarBlue		33.889	0.105	40	10.1002/jat.3566
1117	2018	Ag	I	Sphere	None	Chemical Reduction	Negative	14.3	21.14	79.15	-26.5	-7.9	THP-1	10000	H	Human	Blood	Monocyte	Adult	L	48	0.3	AlamarBlue	AlamarBlue		86.28	0.23	40	10.1002/jat.3566
1118	2018	Ag	I	Sphere	None	Chemical Reduction	Negative	14.3	21.14	79.15	-26.5	-7.9	THP-1	10000	H	Human	Blood	Monocyte	Adult	L	48	0.625	AlamarBlue	AlamarBlue		82.85	0.23	40	10.1002/jat.3566
1119	2018	Ag	I	Sphere	None	Chemical Reduction	Negative	14.3	21.14	79.15	-26.5	-7.9	THP-1	10000	H	Human	Blood	Monocyte	Adult	L	48	1.25	AlamarBlue	AlamarBlue		81.794	0.23	40	10.1002/jat.3566
1120	2018	Ag	I	Sphere	None	Chemical Reduction	Negative	14.3	21.14	79.15	-26.5	-7.9	THP-1	10000	H	Human	Blood	Monocyte	Adult	L	48	2.5	AlamarBlue	AlamarBlue		77.045	0.23	40	10.1002/jat.3566
1121	2018	Ag	I	Sphere	None	Chemical Reduction	Negative	14.3	21.14	79.15	-26.5	-7.9	THP-1	10000	H	Human	Blood	Monocyte	Adult	L	48	5	AlamarBlue	AlamarBlue		22.691	0.23	40	10.1002/jat.3566
1122	2018	Ag	I	Sphere	Liposome	Chemical Reduction	Negative	82.73	140.1	138.9	-31.9	-0.61	THP-1	10000	H	Human	Blood	Monocyte	Adult	L	48	0.3	AlamarBlue	AlamarBlue		85.752	0.105	40	10.1002/jat.3566
1123	2018	Ag	I	Sphere	Liposome	Chemical Reduction	Negative	82.73	140.1	138.9	-31.9	-0.61	THP-1	10000	H	Human	Blood	Monocyte	Adult	L	48	0.625	AlamarBlue	AlamarBlue		85.752	0.105	40	10.1002/jat.3566
1124	2018	Ag	I	Sphere	Liposome	Chemical Reduction	Negative	82.73	140.1	138.9	-31.9	-0.61	THP-1	10000	H	Human	Blood	Monocyte	Adult	L	48	1.25	AlamarBlue	AlamarBlue		82.586	0.105	40	10.1002/jat.3566
1125	2018	Ag	I	Sphere	Liposome	Chemical Reduction	Negative	82.73	140.1	138.9	-31.9	-0.61	THP-1	10000	H	Human	Blood	Monocyte	Adult	L	48	2.5	AlamarBlue	AlamarBlue		30.343	0.105	40	10.1002/jat.3566
1126	2018	Ag	I	Sphere	Liposome	Chemical Reduction	Negative	82.73	140.1	138.9	-31.9	-0.61	THP-1	10000	H	Human	Blood	Monocyte	Adult	L	48	5	AlamarBlue	AlamarBlue		13.984	0.105	40	10.1002/jat.3566
1127	2016	IronOxide	I	Sphere	Silica	Reverse Microemulsion	Negative	10	93.3	111.1	-31.8	-10.3	SHSY5Y	30000	H	Human	BoneMarrow	Epithelial	Adult	L	3	5	MTT	TetrazoliumSalt		99.752		41	10.1002/jat.3213
1128	2016	IronOxide	I	Sphere	Silica	Reverse Microemulsion	Negative	10	93.3	111.1	-31.8	-10.3	SHSY5Y	30000	H	Human	BoneMarrow	Epithelial	Adult	L	3	10	MTT	TetrazoliumSalt		103.22		41	10.1002/jat.3213
1129	2016	IronOxide	I	Sphere	Silica	Reverse Microemulsion	Negative	10	93.3	111.1	-31.8	-10.3	SHSY5Y	30000	H	Human	BoneMarrow	Epithelial	Adult	L	3	25	MTT	TetrazoliumSalt		99.257		41	10.1002/jat.3213
1130	2016	IronOxide	I	Sphere	Silica	Reverse Microemulsion	Negative	10	93.3	111.1	-31.8	-10.3	SHSY5Y	30000	H	Human	BoneMarrow	Epithelial	Adult	L	3	50	MTT	TetrazoliumSalt		100.25		41	10.1002/jat.3213
1131	2016	IronOxide	I	Sphere	Silica	Reverse Microemulsion	Negative	10	93.3	111.1	-31.8	-10.3	SHSY5Y	30000	H	Human	BoneMarrow	Epithelial	Adult	L	3	75	MTT	TetrazoliumSalt		97.525		41	10.1002/jat.3213
1132	2016	IronOxide	I	Sphere	Silica	Reverse Microemulsion	Negative	10	93.3	111.1	-31.8	-10.3	SHSY5Y	30000	H	Human	BoneMarrow	Epithelial	Adult	L	3	100	MTT	TetrazoliumSalt		98.267		41	10.1002/jat.3213
1133	2016	IronOxide	I	Sphere	Silica	Reverse Microemulsion	Negative	10	93.3	111.1	-31.8	-10.3	SHSY5Y	30000	H	Human	BoneMarrow	Epithelial	Adult	L	3	150	MTT	TetrazoliumSalt		99.01		41	10.1002/jat.3213
1134	2016	IronOxide	I	Sphere	Silica	Reverse Microemulsion	Negative	10	93.3	111.1	-31.8	-10.3	SHSY5Y	30000	H	Human	BoneMarrow	Epithelial	Adult	L	3	175	MTT	TetrazoliumSalt		98.267		41	10.1002/jat.3213
1135	2016	IronOxide	I	Sphere	Silica	Reverse Microemulsion	Negative	10	93.3	111.1	-31.8	-10.3	SHSY5Y	30000	H	Human	BoneMarrow	Epithelial	Adult	L	3	200	MTT	TetrazoliumSalt		96.535		41	10.1002/jat.3213
1136	2016	IronOxide	I	Sphere	Silica	Reverse Microemulsion	Negative	10	93.3	111.1	-31.8	-10.3	SHSY5Y	30000	H	Human	BoneMarrow	Epithelial	Adult	L	3	300	MTT	TetrazoliumSalt		97.277		41	10.1002/jat.3213
1137	2016	IronOxide	I	Sphere	OleicAcid	Reverse Microemulsion	Negative	10.9	164.5	202.7	-45.4	-11.6	SHSY5Y	30000	H	Human	BoneMarrow	Epithelial	Adult	L	3	5	MTT	TetrazoliumSalt		96.923		41	10.1002/jat.3213
1138	2016	IronOxide	I	Sphere	OleicAcid	Reverse Microemulsion	Negative	10.9	164.5	202.7	-45.4	-11.6	SHSY5Y	30000	H	Human	BoneMarrow	Epithelial	Adult	L	3	10	MTT	TetrazoliumSalt		97.788		41	10.1002/jat.3213
1139	2016	IronOxide	I	Sphere	OleicAcid	Reverse Microemulsion	Negative	10.9	164.5	202.7	-45.4	-11.6	SHSY5Y	30000	H	Human	BoneMarrow	Epithelial	Adult	L	3	25	MTT	TetrazoliumSalt		100.1		41	10.1002/jat.3213
1140	2016	IronOxide	I	Sphere	OleicAcid	Reverse Microemulsion	Negative	10.9	164.5	202.7	-45.4	-11.6	SHSY5Y	30000	H	Human	BoneMarrow	Epithelial	Adult	L	3	50	MTT	TetrazoliumSalt		93.173		41	10.1002/jat.3213
1141	2016	IronOxide	I	Sphere	OleicAcid	Reverse Microemulsion	Negative	10.9	164.5	202.7	-45.4	-11.6	SHSY5Y	30000	H	Human	BoneMarrow	Epithelial	Adult	L	3	75	MTT	TetrazoliumSalt		94.615		41	10.1002/jat.3213
1142	2016	IronOxide	I	Sphere	OleicAcid	Reverse Microemulsion	Negative	10.9	164.5	202.7	-45.4	-11.6	SHSY5Y	30000	H	Human	BoneMarrow	Epithelial	Adult	L	3	100	MTT	TetrazoliumSalt		96.346		41	10.1002/jat.3213
1143	2016	IronOxide	I	Sphere	OleicAcid	Reverse Microemulsion	Negative	10.9	164.5	202.7	-45.4	-11.6	SHSY5Y	30000	H	Human	BoneMarrow	Epithelial	Adult	L	3	150	MTT	TetrazoliumSalt		91.442		41	10.1002/jat.3213
1144	2016	IronOxide	I	Sphere	OleicAcid	Reverse Microemulsion	Negative	10.9	164.5	202.7	-45.4	-11.6	SHSY5Y	30000	H	Human	BoneMarrow	Epithelial	Adult	L	3	175	MTT	TetrazoliumSalt		93.173		41	10.1002/jat.3213
1145	2016	IronOxide	I	Sphere	OleicAcid	Reverse Microemulsion	Negative	10.9	164.5	202.7	-45.4	-11.6	SHSY5Y	30000	H	Human	BoneMarrow	Epithelial	Adult	L	3	200	MTT	TetrazoliumSalt		94.615		41	10.1002/jat.3213
1146	2016	IronOxide	I	Sphere	OleicAcid	Reverse Microemulsion	Negative	10.9	164.5	202.7	-45.4	-11.6	SHSY5Y	30000	H	Human	BoneMarrow	Epithelial	Adult	L	3	300	MTT	TetrazoliumSalt		96.346		41	10.1002/jat.3213
1147	2016	IronOxide	I	Sphere	Silica	Reverse Microemulsion	Negative	10	93.3	111.1	-31.8	-10.3	SHSY5Y	30000	H	Human	BoneMarrow	Epithelial	Adult	L	6	5	MTT	TetrazoliumSalt		94.554		41	10.1002/jat.3213
1148	2016	IronOxide	I	Sphere	Silica	Reverse Microemulsion	Negative	10	93.3	111.1	-31.8	-10.3	SHSY5Y	30000	H	Human	BoneMarrow	Epithelial	Adult	L	6	10	MTT	TetrazoliumSalt		101.73		41	10.1002/jat.3213
1149	2016	IronOxide	I	Sphere	Silica	Reverse Microemulsion	Negative	10	93.3	111.1	-31.8	-10.3	SHSY5Y	30000	H	Human	BoneMarrow	Epithelial	Adult	L	6	25	MTT	TetrazoliumSalt		100.5		41	10.1002/jat.3213
1150	2016	IronOxide	I	Sphere	Silica	Reverse Microemulsion	Negative	10	93.3	111.1	-31.8	-10.3	SHSY5Y	30000	H	Human	BoneMarrow	Epithelial	Adult	L	6	50	MTT	TetrazoliumSalt		96.287		41	10.1002/jat.3213
1151	2016	IronOxide	I	Sphere	Silica	Reverse Microemulsion	Negative	10	93.3	111.1	-31.8	-10.3	SHSY5Y	30000	H	Human	BoneMarrow	Epithelial	Adult	L	6	75	MTT	TetrazoliumSalt		95.05		41	10.1002/jat.3213
1152	2016	IronOxide	I	Sphere	Silica	Reverse Microemulsion	Negative	10	93.3	111.1	-31.8	-10.3	SHSY5Y	30000	H	Human	BoneMarrow	Epithelial	Adult	L	6	100	MTT	TetrazoliumSalt		100.99		41	10.1002/jat.3213
1153	2016	IronOxide	I	Sphere	Silica	Reverse Microemulsion	Negative	10	93.3	111.1	-31.8	-10.3	SHSY5Y	30000	H	Human	BoneMarrow	Epithelial	Adult	L	6	150	MTT	TetrazoliumSalt		96.535		41	10.1002/jat.3213
1154	2016	IronOxide	I	Sphere	Silica	Reverse Microemulsion	Negative	10	93.3	111.1	-31.8	-10.3	SHSY5Y	30000	H	Human	BoneMarrow	Epithelial	Adult	L	6	175	MTT	TetrazoliumSalt		95.792		41	10.1002/jat.3213
1155	2016	IronOxide	I	Sphere	Silica	Reverse Microemulsion	Negative	10	93.3	111.1	-31.8	-10.3	SHSY5Y	30000	H	Human	BoneMarrow	Epithelial	Adult	L	6	200	MTT	TetrazoliumSalt		96.04		41	10.1002/jat.3213
1156	2016	IronOxide	I	Sphere	Silica	Reverse Microemulsion	Negative	10	93.3	111.1	-31.8	-10.3	SHSY5Y	30000	H	Human	BoneMarrow	Epithelial	Adult	L	6	300	MTT	TetrazoliumSalt		96.04		41	10.1002/jat.3213
1157	2016	IronOxide	I	Sphere	OleicAcid	Reverse Microemulsion	Negative	10.9	164.5	202.7	-45.4	-11.6	SHSY5Y	30000	H	Human	BoneMarrow	Epithelial	Adult	L	6	5	MTT	TetrazoliumSalt		100.38		41	10.1002/jat.3213
1158	2016	IronOxide	I	Sphere	OleicAcid	Reverse Microemulsion	Negative	10.9	164.5	202.7	-45.4	-11.6	SHSY5Y	30000	H	Human	BoneMarrow	Epithelial	Adult	L	6	10	MTT	TetrazoliumSalt		96.923		41	10.1002/jat.3213
1159	2016	IronOxide	I	Sphere	OleicAcid	Reverse Microemulsion	Negative	10.9	164.5	202.7	-45.4	-11.6	SHSY5Y	30000	H	Human	BoneMarrow	Epithelial	Adult	L	6	25	MTT	TetrazoliumSalt		101.54		41	10.1002/jat.3213
1160	2016	IronOxide	I	Sphere	OleicAcid	Reverse Microemulsion	Negative	10.9	164.5	202.7	-45.4	-11.6	SHSY5Y	30000	H	Human	BoneMarrow	Epithelial	Adult	L	6	50	MTT	TetrazoliumSalt		96.346		41	10.1002/jat.3213
1161	2016	IronOxide	I	Sphere	OleicAcid	Reverse Microemulsion	Negative	10.9	164.5	202.7	-45.4	-11.6	SHSY5Y	30000	H	Human	BoneMarrow	Epithelial	Adult	L	6	75	MTT	TetrazoliumSalt		100.1		41	10.1002/jat.3213
1162	2016	IronOxide	I	Sphere	OleicAcid	Reverse Microemulsion	Negative	10.9	164.5	202.7	-45.4	-11.6	SHSY5Y	30000	H	Human	BoneMarrow	Epithelial	Adult	L	6	100	MTT	TetrazoliumSalt		100.38		41	10.1002/jat.3213
1163	2016	IronOxide	I	Sphere	OleicAcid	Reverse Microemulsion	Negative	10.9	164.5	202.7	-45.4	-11.6	SHSY5Y	30000	H	Human	BoneMarrow	Epithelial	Adult	L	6	150	MTT	TetrazoliumSalt		101.54		41	10.1002/jat.3213
1164	2016	IronOxide	I	Sphere	OleicAcid	Reverse Microemulsion	Negative	10.9	164.5	202.7	-45.4	-11.6	SHSY5Y	30000	H	Human	BoneMarrow	Epithelial	Adult	L	6	175	MTT	TetrazoliumSalt		98.654		41	10.1002/jat.3213
1165	2016	IronOxide	I	Sphere	OleicAcid	Reverse Microemulsion	Negative	10.9	164.5	202.7	-45.4	-11.6	SHSY5Y	30000	H	Human	BoneMarrow	Epithelial	Adult	L	6	200	MTT	TetrazoliumSalt		101.25		41	10.1002/jat.3213
1166	2016	IronOxide	I	Sphere	OleicAcid	Reverse Microemulsion	Negative	10.9	164.5	202.7	-45.4	-11.6	SHSY5Y	30000	H	Human	BoneMarrow	Epithelial	Adult	L	6	300	MTT	TetrazoliumSalt		100.1		41	10.1002/jat.3213
1167	2016	IronOxide	I	Sphere	Silica	Reverse Microemulsion	Negative	10	93.3	111.1	-31.8	-10.3	SHSY5Y	30000	H	Human	BoneMarrow	Epithelial	Adult	L	24	5	MTT	TetrazoliumSalt		96.535		41	10.1002/jat.3213
1168	2016	IronOxide	I	Sphere	Silica	Reverse Microemulsion	Negative	10	93.3	111.1	-31.8	-10.3	SHSY5Y	30000	H	Human	BoneMarrow	Epithelial	Adult	L	24	10	MTT	TetrazoliumSalt		89.109		41	10.1002/jat.3213
1169	2016	IronOxide	I	Sphere	Silica	Reverse Microemulsion	Negative	10	93.3	111.1	-31.8	-10.3	SHSY5Y	30000	H	Human	BoneMarrow	Epithelial	Adult	L	24	25	MTT	TetrazoliumSalt		99.257		41	10.1002/jat.3213
1170	2016	IronOxide	I	Sphere	Silica	Reverse Microemulsion	Negative	10	93.3	111.1	-31.8	-10.3	SHSY5Y	30000	H	Human	BoneMarrow	Epithelial	Adult	L	24	50	MTT	TetrazoliumSalt		93.069		41	10.1002/jat.3213
1171	2016	IronOxide	I	Sphere	Silica	Reverse Microemulsion	Negative	10	93.3	111.1	-31.8	-10.3	SHSY5Y	30000	H	Human	BoneMarrow	Epithelial	Adult	L	24	75	MTT	TetrazoliumSalt		99.01		41	10.1002/jat.3213
1172	2016	IronOxide	I	Sphere	Silica	Reverse Microemulsion	Negative	10	93.3	111.1	-31.8	-10.3	SHSY5Y	30000	H	Human	BoneMarrow	Epithelial	Adult	L	24	100	MTT	TetrazoliumSalt		103.22		41	10.1002/jat.3213
1173	2016	IronOxide	I	Sphere	Silica	Reverse Microemulsion	Negative	10	93.3	111.1	-31.8	-10.3	SHSY5Y	30000	H	Human	BoneMarrow	Epithelial	Adult	L	24	150	MTT	TetrazoliumSalt		107.67		41	10.1002/jat.3213
1174	2016	IronOxide	I	Sphere	Silica	Reverse Microemulsion	Negative	10	93.3	111.1	-31.8	-10.3	SHSY5Y	30000	H	Human	BoneMarrow	Epithelial	Adult	L	24	175	MTT	TetrazoliumSalt		107.18		41	10.1002/jat.3213
1175	2016	IronOxide	I	Sphere	Silica	Reverse Microemulsion	Negative	10	93.3	111.1	-31.8	-10.3	SHSY5Y	30000	H	Human	BoneMarrow	Epithelial	Adult	L	24	200	MTT	TetrazoliumSalt		106.19		41	10.1002/jat.3213
1176	2016	IronOxide	I	Sphere	Silica	Reverse Microemulsion	Negative	10	93.3	111.1	-31.8	-10.3	SHSY5Y	30000	H	Human	BoneMarrow	Epithelial	Adult	L	24	300	MTT	TetrazoliumSalt		96.04		41	10.1002/jat.3213
1177	2016	IronOxide	I	Sphere	OleicAcid	Reverse Microemulsion	Negative	10.9	164.5	202.7	-45.4	-11.6	SHSY5Y	30000	H	Human	BoneMarrow	Epithelial	Adult	L	24	5	MTT	TetrazoliumSalt		96.058		41	10.1002/jat.3213
1178	2016	IronOxide	I	Sphere	OleicAcid	Reverse Microemulsion	Negative	10.9	164.5	202.7	-45.4	-11.6	SHSY5Y	30000	H	Human	BoneMarrow	Epithelial	Adult	L	24	10	MTT	TetrazoliumSalt		88.558		41	10.1002/jat.3213
1179	2016	IronOxide	I	Sphere	OleicAcid	Reverse Microemulsion	Negative	10.9	164.5	202.7	-45.4	-11.6	SHSY5Y	30000	H	Human	BoneMarrow	Epithelial	Adult	L	24	25	MTT	TetrazoliumSalt		98.654		41	10.1002/jat.3213
1180	2016	IronOxide	I	Sphere	OleicAcid	Reverse Microemulsion	Negative	10.9	164.5	202.7	-45.4	-11.6	SHSY5Y	30000	H	Human	BoneMarrow	Epithelial	Adult	L	24	50	MTT	TetrazoliumSalt		92.596		41	10.1002/jat.3213
1181	2016	IronOxide	I	Sphere	OleicAcid	Reverse Microemulsion	Negative	10.9	164.5	202.7	-45.4	-11.6	SHSY5Y	30000	H	Human	BoneMarrow	Epithelial	Adult	L	24	75	MTT	TetrazoliumSalt		98.654		41	10.1002/jat.3213
1182	2016	IronOxide	I	Sphere	OleicAcid	Reverse Microemulsion	Negative	10.9	164.5	202.7	-45.4	-11.6	SHSY5Y	30000	H	Human	BoneMarrow	Epithelial	Adult	L	24	100	MTT	TetrazoliumSalt		102.69		41	10.1002/jat.3213
1183	2016	IronOxide	I	Sphere	OleicAcid	Reverse Microemulsion	Negative	10.9	164.5	202.7	-45.4	-11.6	SHSY5Y	30000	H	Human	BoneMarrow	Epithelial	Adult	L	24	150	MTT	TetrazoliumSalt		107.31		41	10.1002/jat.3213
1184	2016	IronOxide	I	Sphere	OleicAcid	Reverse Microemulsion	Negative	10.9	164.5	202.7	-45.4	-11.6	SHSY5Y	30000	H	Human	BoneMarrow	Epithelial	Adult	L	24	175	MTT	TetrazoliumSalt		106.44		41	10.1002/jat.3213
1185	2016	IronOxide	I	Sphere	OleicAcid	Reverse Microemulsion	Negative	10.9	164.5	202.7	-45.4	-11.6	SHSY5Y	30000	H	Human	BoneMarrow	Epithelial	Adult	L	24	200	MTT	TetrazoliumSalt		105.87		41	10.1002/jat.3213
1186	2016	IronOxide	I	Sphere	OleicAcid	Reverse Microemulsion	Negative	10.9	164.5	202.7	-45.4	-11.6	SHSY5Y	30000	H	Human	BoneMarrow	Epithelial	Adult	L	24	300	MTT	TetrazoliumSalt		95.481		41	10.1002/jat.3213
1187	2016	IronOxide	I	Sphere	Silica	Reverse Microemulsion	Negative	10	93.3	111.1	-31.8	-10.3	SHSY5Y	30000	H	Human	BoneMarrow	Epithelial	Adult	L	3	5	NRU	NeutralRed		108.02		41	10.1002/jat.3213
1188	2016	IronOxide	I	Sphere	Silica	Reverse Microemulsion	Negative	10	93.3	111.1	-31.8	-10.3	SHSY5Y	30000	H	Human	BoneMarrow	Epithelial	Adult	L	3	10	NRU	NeutralRed		99.543		41	10.1002/jat.3213
1189	2016	IronOxide	I	Sphere	Silica	Reverse Microemulsion	Negative	10	93.3	111.1	-31.8	-10.3	SHSY5Y	30000	H	Human	BoneMarrow	Epithelial	Adult	L	3	25	NRU	NeutralRed		102.54		41	10.1002/jat.3213
1190	2016	IronOxide	I	Sphere	Silica	Reverse Microemulsion	Negative	10	93.3	111.1	-31.8	-10.3	SHSY5Y	30000	H	Human	BoneMarrow	Epithelial	Adult	L	3	50	NRU	NeutralRed		111.02		41	10.1002/jat.3213
1191	2016	IronOxide	I	Sphere	Silica	Reverse Microemulsion	Negative	10	93.3	111.1	-31.8	-10.3	SHSY5Y	30000	H	Human	BoneMarrow	Epithelial	Adult	L	3	75	NRU	NeutralRed		101.79		41	10.1002/jat.3213
1192	2016	IronOxide	I	Sphere	Silica	Reverse Microemulsion	Negative	10	93.3	111.1	-31.8	-10.3	SHSY5Y	30000	H	Human	BoneMarrow	Epithelial	Adult	L	3	100	NRU	NeutralRed		106.78		41	10.1002/jat.3213
1193	2016	IronOxide	I	Sphere	Silica	Reverse Microemulsion	Negative	10	93.3	111.1	-31.8	-10.3	SHSY5Y	30000	H	Human	BoneMarrow	Epithelial	Adult	L	3	150	NRU	NeutralRed		106.78		41	10.1002/jat.3213
1194	2016	IronOxide	I	Sphere	Silica	Reverse Microemulsion	Negative	10	93.3	111.1	-31.8	-10.3	SHSY5Y	30000	H	Human	BoneMarrow	Epithelial	Adult	L	3	175	NRU	NeutralRed		103.78		41	10.1002/jat.3213
1195	2016	IronOxide	I	Sphere	Silica	Reverse Microemulsion	Negative	10	93.3	111.1	-31.8	-10.3	SHSY5Y	30000	H	Human	BoneMarrow	Epithelial	Adult	L	3	200	NRU	NeutralRed		111.52		41	10.1002/jat.3213
1196	2016	IronOxide	I	Sphere	Silica	Reverse Microemulsion	Negative	10	93.3	111.1	-31.8	-10.3	SHSY5Y	30000	H	Human	BoneMarrow	Epithelial	Adult	L	3	300	NRU	NeutralRed		101.79		41	10.1002/jat.3213
1197	2016	IronOxide	I	Sphere	OleicAcid	Reverse Microemulsion	Negative	10.9	164.5	202.7	-45.4	-11.6	SHSY5Y	30000	H	Human	BoneMarrow	Epithelial	Adult	L	3	5	NRU	NeutralRed		102.39		41	10.1002/jat.3213
1198	2016	IronOxide	I	Sphere	OleicAcid	Reverse Microemulsion	Negative	10.9	164.5	202.7	-45.4	-11.6	SHSY5Y	30000	H	Human	BoneMarrow	Epithelial	Adult	L	3	10	NRU	NeutralRed		103.76		41	10.1002/jat.3213
1199	2016	IronOxide	I	Sphere	OleicAcid	Reverse Microemulsion	Negative	10.9	164.5	202.7	-45.4	-11.6	SHSY5Y	30000	H	Human	BoneMarrow	Epithelial	Adult	L	3	25	NRU	NeutralRed		108.99		41	10.1002/jat.3213
1200	2016	IronOxide	I	Sphere	OleicAcid	Reverse Microemulsion	Negative	10.9	164.5	202.7	-45.4	-11.6	SHSY5Y	30000	H	Human	BoneMarrow	Epithelial	Adult	L	3	50	NRU	NeutralRed		107.61		41	10.1002/jat.3213
1201	2016	IronOxide	I	Sphere	OleicAcid	Reverse Microemulsion	Negative	10.9	164.5	202.7	-45.4	-11.6	SHSY5Y	30000	H	Human	BoneMarrow	Epithelial	Adult	L	3	75	NRU	NeutralRed		112.02		41	10.1002/jat.3213
1202	2016	IronOxide	I	Sphere	OleicAcid	Reverse Microemulsion	Negative	10.9	164.5	202.7	-45.4	-11.6	SHSY5Y	30000	H	Human	BoneMarrow	Epithelial	Adult	L	3	100	NRU	NeutralRed		109.82		41	10.1002/jat.3213
1203	2016	IronOxide	I	Sphere	OleicAcid	Reverse Microemulsion	Negative	10.9	164.5	202.7	-45.4	-11.6	SHSY5Y	30000	H	Human	BoneMarrow	Epithelial	Adult	L	3	150	NRU	NeutralRed		81.743		41	10.1002/jat.3213
1204	2016	IronOxide	I	Sphere	OleicAcid	Reverse Microemulsion	Negative	10.9	164.5	202.7	-45.4	-11.6	SHSY5Y	30000	H	Human	BoneMarrow	Epithelial	Adult	L	3	175	NRU	NeutralRed		111.74		41	10.1002/jat.3213
1205	2016	IronOxide	I	Sphere	OleicAcid	Reverse Microemulsion	Negative	10.9	164.5	202.7	-45.4	-11.6	SHSY5Y	30000	H	Human	BoneMarrow	Epithelial	Adult	L	3	200	NRU	NeutralRed		108.44		41	10.1002/jat.3213
1206	2016	IronOxide	I	Sphere	OleicAcid	Reverse Microemulsion	Negative	10.9	164.5	202.7	-45.4	-11.6	SHSY5Y	30000	H	Human	BoneMarrow	Epithelial	Adult	L	3	300	NRU	NeutralRed		115.87		41	10.1002/jat.3213
1207	2016	IronOxide	I	Sphere	Silica	Reverse Microemulsion	Negative	10	93.3	111.1	-31.8	-10.3	SHSY5Y	30000	H	Human	BoneMarrow	Epithelial	Adult	L	6	5	NRU	NeutralRed		93.555		41	10.1002/jat.3213
1208	2016	IronOxide	I	Sphere	Silica	Reverse Microemulsion	Negative	10	93.3	111.1	-31.8	-10.3	SHSY5Y	30000	H	Human	BoneMarrow	Epithelial	Adult	L	6	10	NRU	NeutralRed		101.29		41	10.1002/jat.3213
1209	2016	IronOxide	I	Sphere	Silica	Reverse Microemulsion	Negative	10	93.3	111.1	-31.8	-10.3	SHSY5Y	30000	H	Human	BoneMarrow	Epithelial	Adult	L	6	25	NRU	NeutralRed		100.04		41	10.1002/jat.3213
1210	2016	IronOxide	I	Sphere	Silica	Reverse Microemulsion	Negative	10	93.3	111.1	-31.8	-10.3	SHSY5Y	30000	H	Human	BoneMarrow	Epithelial	Adult	L	6	50	NRU	NeutralRed		98.295		41	10.1002/jat.3213
1211	2016	IronOxide	I	Sphere	Silica	Reverse Microemulsion	Negative	10	93.3	111.1	-31.8	-10.3	SHSY5Y	30000	H	Human	BoneMarrow	Epithelial	Adult	L	6	75	NRU	NeutralRed		100.04		41	10.1002/jat.3213
1212	2016	IronOxide	I	Sphere	Silica	Reverse Microemulsion	Negative	10	93.3	111.1	-31.8	-10.3	SHSY5Y	30000	H	Human	BoneMarrow	Epithelial	Adult	L	6	100	NRU	NeutralRed		95.8		41	10.1002/jat.3213
1213	2016	IronOxide	I	Sphere	Silica	Reverse Microemulsion	Negative	10	93.3	111.1	-31.8	-10.3	SHSY5Y	30000	H	Human	BoneMarrow	Epithelial	Adult	L	6	150	NRU	NeutralRed		100.04		41	10.1002/jat.3213
1214	2016	IronOxide	I	Sphere	Silica	Reverse Microemulsion	Negative	10	93.3	111.1	-31.8	-10.3	SHSY5Y	30000	H	Human	BoneMarrow	Epithelial	Adult	L	6	175	NRU	NeutralRed		102.54		41	10.1002/jat.3213
1215	2016	IronOxide	I	Sphere	Silica	Reverse Microemulsion	Negative	10	93.3	111.1	-31.8	-10.3	SHSY5Y	30000	H	Human	BoneMarrow	Epithelial	Adult	L	6	200	NRU	NeutralRed		98.046		41	10.1002/jat.3213
1216	2016	IronOxide	I	Sphere	Silica	Reverse Microemulsion	Negative	10	93.3	111.1	-31.8	-10.3	SHSY5Y	30000	H	Human	BoneMarrow	Epithelial	Adult	L	6	300	NRU	NeutralRed		94.553		41	10.1002/jat.3213
1217	2016	IronOxide	I	Sphere	OleicAcid	Reverse Microemulsion	Negative	10.9	164.5	202.7	-45.4	-11.6	SHSY5Y	30000	H	Human	BoneMarrow	Epithelial	Adult	L	6	5	NRU	NeutralRed		96.881		41	10.1002/jat.3213
1218	2016	IronOxide	I	Sphere	OleicAcid	Reverse Microemulsion	Negative	10.9	164.5	202.7	-45.4	-11.6	SHSY5Y	30000	H	Human	BoneMarrow	Epithelial	Adult	L	6	10	NRU	NeutralRed		101.01		41	10.1002/jat.3213
1219	2016	IronOxide	I	Sphere	OleicAcid	Reverse Microemulsion	Negative	10.9	164.5	202.7	-45.4	-11.6	SHSY5Y	30000	H	Human	BoneMarrow	Epithelial	Adult	L	6	25	NRU	NeutralRed		104.59		41	10.1002/jat.3213
1220	2016	IronOxide	I	Sphere	OleicAcid	Reverse Microemulsion	Negative	10.9	164.5	202.7	-45.4	-11.6	SHSY5Y	30000	H	Human	BoneMarrow	Epithelial	Adult	L	6	50	NRU	NeutralRed		99.633		41	10.1002/jat.3213
1221	2016	IronOxide	I	Sphere	OleicAcid	Reverse Microemulsion	Negative	10.9	164.5	202.7	-45.4	-11.6	SHSY5Y	30000	H	Human	BoneMarrow	Epithelial	Adult	L	6	75	NRU	NeutralRed		101.56		41	10.1002/jat.3213
1222	2016	IronOxide	I	Sphere	OleicAcid	Reverse Microemulsion	Negative	10.9	164.5	202.7	-45.4	-11.6	SHSY5Y	30000	H	Human	BoneMarrow	Epithelial	Adult	L	6	100	NRU	NeutralRed		94.679		41	10.1002/jat.3213
1223	2016	IronOxide	I	Sphere	OleicAcid	Reverse Microemulsion	Negative	10.9	164.5	202.7	-45.4	-11.6	SHSY5Y	30000	H	Human	BoneMarrow	Epithelial	Adult	L	6	150	NRU	NeutralRed		104.04		41	10.1002/jat.3213
1224	2016	IronOxide	I	Sphere	OleicAcid	Reverse Microemulsion	Negative	10.9	164.5	202.7	-45.4	-11.6	SHSY5Y	30000	H	Human	BoneMarrow	Epithelial	Adult	L	6	175	NRU	NeutralRed		103.76		41	10.1002/jat.3213
1225	2016	IronOxide	I	Sphere	OleicAcid	Reverse Microemulsion	Negative	10.9	164.5	202.7	-45.4	-11.6	SHSY5Y	30000	H	Human	BoneMarrow	Epithelial	Adult	L	6	200	NRU	NeutralRed		107.34		41	10.1002/jat.3213
1226	2016	IronOxide	I	Sphere	OleicAcid	Reverse Microemulsion	Negative	10.9	164.5	202.7	-45.4	-11.6	SHSY5Y	30000	H	Human	BoneMarrow	Epithelial	Adult	L	6	300	NRU	NeutralRed		97.982		41	10.1002/jat.3213
1227	2016	IronOxide	I	Sphere	Silica	Reverse Microemulsion	Negative	10	93.3	111.1	-31.8	-10.3	SHSY5Y	30000	H	Human	BoneMarrow	Epithelial	Adult	L	24	5	NRU	NeutralRed		108.52		41	10.1002/jat.3213
1228	2016	IronOxide	I	Sphere	Silica	Reverse Microemulsion	Negative	10	93.3	111.1	-31.8	-10.3	SHSY5Y	30000	H	Human	BoneMarrow	Epithelial	Adult	L	24	10	NRU	NeutralRed		108.02		41	10.1002/jat.3213
1229	2016	IronOxide	I	Sphere	Silica	Reverse Microemulsion	Negative	10	93.3	111.1	-31.8	-10.3	SHSY5Y	30000	H	Human	BoneMarrow	Epithelial	Adult	L	24	25	NRU	NeutralRed		107.28		41	10.1002/jat.3213
1230	2016	IronOxide	I	Sphere	Silica	Reverse Microemulsion	Negative	10	93.3	111.1	-31.8	-10.3	SHSY5Y	30000	H	Human	BoneMarrow	Epithelial	Adult	L	24	50	NRU	NeutralRed		105.53		41	10.1002/jat.3213
1231	2016	IronOxide	I	Sphere	Silica	Reverse Microemulsion	Negative	10	93.3	111.1	-31.8	-10.3	SHSY5Y	30000	H	Human	BoneMarrow	Epithelial	Adult	L	24	75	NRU	NeutralRed		112.77		41	10.1002/jat.3213
1232	2016	IronOxide	I	Sphere	Silica	Reverse Microemulsion	Negative	10	93.3	111.1	-31.8	-10.3	SHSY5Y	30000	H	Human	BoneMarrow	Epithelial	Adult	L	24	100	NRU	NeutralRed		107.28		41	10.1002/jat.3213
1233	2016	IronOxide	I	Sphere	Silica	Reverse Microemulsion	Negative	10	93.3	111.1	-31.8	-10.3	SHSY5Y	30000	H	Human	BoneMarrow	Epithelial	Adult	L	24	150	NRU	NeutralRed		104.28		41	10.1002/jat.3213
1234	2016	IronOxide	I	Sphere	Silica	Reverse Microemulsion	Negative	10	93.3	111.1	-31.8	-10.3	SHSY5Y	30000	H	Human	BoneMarrow	Epithelial	Adult	L	24	175	NRU	NeutralRed		98.046		41	10.1002/jat.3213
1235	2016	IronOxide	I	Sphere	Silica	Reverse Microemulsion	Negative	10	93.3	111.1	-31.8	-10.3	SHSY5Y	30000	H	Human	BoneMarrow	Epithelial	Adult	L	24	200	NRU	NeutralRed		96.05		41	10.1002/jat.3213
1236	2016	IronOxide	I	Sphere	Silica	Reverse Microemulsion	Negative	10	93.3	111.1	-31.8	-10.3	SHSY5Y	30000	H	Human	BoneMarrow	Epithelial	Adult	L	24	300	NRU	NeutralRed		88.316		41	10.1002/jat.3213
1237	2016	IronOxide	I	Sphere	OleicAcid	Reverse Microemulsion	Negative	10.9	164.5	202.7	-45.4	-11.6	SHSY5Y	30000	H	Human	BoneMarrow	Epithelial	Adult	L	24	5	NRU	NeutralRed		96.881		41	10.1002/jat.3213
1238	2016	IronOxide	I	Sphere	OleicAcid	Reverse Microemulsion	Negative	10.9	164.5	202.7	-45.4	-11.6	SHSY5Y	30000	H	Human	BoneMarrow	Epithelial	Adult	L	24	10	NRU	NeutralRed		105.96		41	10.1002/jat.3213
1239	2016	IronOxide	I	Sphere	OleicAcid	Reverse Microemulsion	Negative	10.9	164.5	202.7	-45.4	-11.6	SHSY5Y	30000	H	Human	BoneMarrow	Epithelial	Adult	L	24	25	NRU	NeutralRed		104.59		41	10.1002/jat.3213
1240	2016	IronOxide	I	Sphere	OleicAcid	Reverse Microemulsion	Negative	10.9	164.5	202.7	-45.4	-11.6	SHSY5Y	30000	H	Human	BoneMarrow	Epithelial	Adult	L	24	50	NRU	NeutralRed		104.04		41	10.1002/jat.3213
1241	2016	IronOxide	I	Sphere	OleicAcid	Reverse Microemulsion	Negative	10.9	164.5	202.7	-45.4	-11.6	SHSY5Y	30000	H	Human	BoneMarrow	Epithelial	Adult	L	24	75	NRU	NeutralRed		107.06		41	10.1002/jat.3213
1242	2016	IronOxide	I	Sphere	OleicAcid	Reverse Microemulsion	Negative	10.9	164.5	202.7	-45.4	-11.6	SHSY5Y	30000	H	Human	BoneMarrow	Epithelial	Adult	L	24	100	NRU	NeutralRed		105.69		41	10.1002/jat.3213
1243	2016	IronOxide	I	Sphere	OleicAcid	Reverse Microemulsion	Negative	10.9	164.5	202.7	-45.4	-11.6	SHSY5Y	30000	H	Human	BoneMarrow	Epithelial	Adult	L	24	150	NRU	NeutralRed		104.31		41	10.1002/jat.3213
1244	2016	IronOxide	I	Sphere	OleicAcid	Reverse Microemulsion	Negative	10.9	164.5	202.7	-45.4	-11.6	SHSY5Y	30000	H	Human	BoneMarrow	Epithelial	Adult	L	24	175	NRU	NeutralRed		102.39		41	10.1002/jat.3213
1245	2016	IronOxide	I	Sphere	OleicAcid	Reverse Microemulsion	Negative	10.9	164.5	202.7	-45.4	-11.6	SHSY5Y	30000	H	Human	BoneMarrow	Epithelial	Adult	L	24	200	NRU	NeutralRed		96.33		41	10.1002/jat.3213
1246	2016	IronOxide	I	Sphere	OleicAcid	Reverse Microemulsion	Negative	10.9	164.5	202.7	-45.4	-11.6	SHSY5Y	30000	H	Human	BoneMarrow	Epithelial	Adult	L	24	300	NRU	NeutralRed		97.431		41	10.1002/jat.3213
1247	2013	ZnO	I	Sphere	None	Commercial	Negative	100	243.7	273.4	-8.23	-11.7	SHSY5Y	350000	H	Human	BoneMarrow	Epithelial	Adult	L	3	10	MTT	TetrazoliumSalt		97.431		42	10.1016/j.envint.2013.02.013
1248	2013	ZnO	I	Sphere	None	Commercial	Negative	100	243.7	273.4	-8.23	-11.7	SHSY5Y	350000	H	Human	BoneMarrow	Epithelial	Adult	L	3	15	MTT	TetrazoliumSalt		90.711		42	10.1016/j.envint.2013.02.013
1249	2013	ZnO	I	Sphere	None	Commercial	Negative	100	243.7	273.4	-8.23	-11.7	SHSY5Y	350000	H	Human	BoneMarrow	Epithelial	Adult	L	3	20	MTT	TetrazoliumSalt		89.526		42	10.1016/j.envint.2013.02.013
1250	2013	ZnO	I	Sphere	None	Commercial	Negative	100	243.7	273.4	-8.23	-11.7	SHSY5Y	350000	H	Human	BoneMarrow	Epithelial	Adult	L	3	25	MTT	TetrazoliumSalt		76.877		42	10.1016/j.envint.2013.02.013
1251	2013	ZnO	I	Sphere	None	Commercial	Negative	100	243.7	273.4	-8.23	-11.7	SHSY5Y	350000	H	Human	BoneMarrow	Epithelial	Adult	L	3	30	MTT	TetrazoliumSalt		71.146		42	10.1016/j.envint.2013.02.013
1252	2013	ZnO	I	Sphere	None	Commercial	Negative	100	243.7	273.4	-8.23	-11.7	SHSY5Y	350000	H	Human	BoneMarrow	Epithelial	Adult	L	3	35	MTT	TetrazoliumSalt		64.822		42	10.1016/j.envint.2013.02.013
1253	2013	ZnO	I	Sphere	None	Commercial	Negative	100	243.7	273.4	-8.23	-11.7	SHSY5Y	350000	H	Human	BoneMarrow	Epithelial	Adult	L	3	40	MTT	TetrazoliumSalt		61.66		42	10.1016/j.envint.2013.02.013
1254	2013	ZnO	I	Sphere	None	Commercial	Negative	100	243.7	273.4	-8.23	-11.7	SHSY5Y	350000	H	Human	BoneMarrow	Epithelial	Adult	L	3	80	MTT	TetrazoliumSalt		48.419		42	10.1016/j.envint.2013.02.013
1255	2013	ZnO	I	Sphere	None	Commercial	Negative	100	243.7	273.4	-8.23	-11.7	SHSY5Y	350000	H	Human	BoneMarrow	Epithelial	Adult	L	6	10	MTT	TetrazoliumSalt		95.85		42	10.1016/j.envint.2013.02.013
1256	2013	ZnO	I	Sphere	None	Commercial	Negative	100	243.7	273.4	-8.23	-11.7	SHSY5Y	350000	H	Human	BoneMarrow	Epithelial	Adult	L	6	15	MTT	TetrazoliumSalt		86.759		42	10.1016/j.envint.2013.02.013
1257	2013	ZnO	I	Sphere	None	Commercial	Negative	100	243.7	273.4	-8.23	-11.7	SHSY5Y	350000	H	Human	BoneMarrow	Epithelial	Adult	L	6	20	MTT	TetrazoliumSalt		81.225		42	10.1016/j.envint.2013.02.013
1258	2013	ZnO	I	Sphere	None	Commercial	Negative	100	243.7	273.4	-8.23	-11.7	SHSY5Y	350000	H	Human	BoneMarrow	Epithelial	Adult	L	6	25	MTT	TetrazoliumSalt		72.53		42	10.1016/j.envint.2013.02.013
1259	2013	ZnO	I	Sphere	None	Commercial	Negative	100	243.7	273.4	-8.23	-11.7	SHSY5Y	350000	H	Human	BoneMarrow	Epithelial	Adult	L	6	30	MTT	TetrazoliumSalt		68.577		42	10.1016/j.envint.2013.02.013
1260	2013	ZnO	I	Sphere	None	Commercial	Negative	100	243.7	273.4	-8.23	-11.7	SHSY5Y	350000	H	Human	BoneMarrow	Epithelial	Adult	L	6	35	MTT	TetrazoliumSalt		61.067		42	10.1016/j.envint.2013.02.013
1261	2013	ZnO	I	Sphere	None	Commercial	Negative	100	243.7	273.4	-8.23	-11.7	SHSY5Y	350000	H	Human	BoneMarrow	Epithelial	Adult	L	6	40	MTT	TetrazoliumSalt		57.115		42	10.1016/j.envint.2013.02.013
1262	2013	ZnO	I	Sphere	None	Commercial	Negative	100	243.7	273.4	-8.23	-11.7	SHSY5Y	350000	H	Human	BoneMarrow	Epithelial	Adult	L	6	80	MTT	TetrazoliumSalt		30.435		42	10.1016/j.envint.2013.02.013
1263	2013	ZnO	I	Sphere	None	Commercial	Negative	100	243.7	273.4	-8.23	-11.7	SHSY5Y	350000	H	Human	BoneMarrow	Epithelial	Adult	L	24	10	MTT	TetrazoliumSalt		79.249		42	10.1016/j.envint.2013.02.013
1264	2013	ZnO	I	Sphere	None	Commercial	Negative	100	243.7	273.4	-8.23	-11.7	SHSY5Y	350000	H	Human	BoneMarrow	Epithelial	Adult	L	24	15	MTT	TetrazoliumSalt		80.237		42	10.1016/j.envint.2013.02.013
1265	2013	ZnO	I	Sphere	None	Commercial	Negative	100	243.7	273.4	-8.23	-11.7	SHSY5Y	350000	H	Human	BoneMarrow	Epithelial	Adult	L	24	20	MTT	TetrazoliumSalt		72.134		42	10.1016/j.envint.2013.02.013
1266	2013	ZnO	I	Sphere	None	Commercial	Negative	100	243.7	273.4	-8.23	-11.7	SHSY5Y	350000	H	Human	BoneMarrow	Epithelial	Adult	L	24	25	MTT	TetrazoliumSalt		14.625		42	10.1016/j.envint.2013.02.013
1267	2013	ZnO	I	Sphere	None	Commercial	Negative	100	243.7	273.4	-8.23	-11.7	SHSY5Y	350000	H	Human	BoneMarrow	Epithelial	Adult	L	24	30	MTT	TetrazoliumSalt		11.858		42	10.1016/j.envint.2013.02.013
1268	2013	ZnO	I	Sphere	None	Commercial	Negative	100	243.7	273.4	-8.23	-11.7	SHSY5Y	350000	H	Human	BoneMarrow	Epithelial	Adult	L	24	35	MTT	TetrazoliumSalt		9.6838		42	10.1016/j.envint.2013.02.013
1269	2013	ZnO	I	Sphere	None	Commercial	Negative	100	243.7	273.4	-8.23	-11.7	SHSY5Y	350000	H	Human	BoneMarrow	Epithelial	Adult	L	24	40	MTT	TetrazoliumSalt		9.2885		42	10.1016/j.envint.2013.02.013
1270	2013	ZnO	I	Sphere	None	Commercial	Negative	100	243.7	273.4	-8.23	-11.7	SHSY5Y	350000	H	Human	BoneMarrow	Epithelial	Adult	L	24	80	MTT	TetrazoliumSalt		-3.5573		42	10.1016/j.envint.2013.02.013
1271	2013	ZnO	I	Sphere	None	Commercial	Negative	100	243.7	273.4	-8.23	-11.7	SHSY5Y	350000	H	Human	BoneMarrow	Epithelial	Adult	L	48	10	MTT	TetrazoliumSalt		77.273		42	10.1016/j.envint.2013.02.013
1272	2013	ZnO	I	Sphere	None	Commercial	Negative	100	243.7	273.4	-8.23	-11.7	SHSY5Y	350000	H	Human	BoneMarrow	Epithelial	Adult	L	48	15	MTT	TetrazoliumSalt		72.134		42	10.1016/j.envint.2013.02.013
1273	2013	ZnO	I	Sphere	None	Commercial	Negative	100	243.7	273.4	-8.23	-11.7	SHSY5Y	350000	H	Human	BoneMarrow	Epithelial	Adult	L	48	20	MTT	TetrazoliumSalt		56.719		42	10.1016/j.envint.2013.02.013
1274	2013	ZnO	I	Sphere	None	Commercial	Negative	100	243.7	273.4	-8.23	-11.7	SHSY5Y	350000	H	Human	BoneMarrow	Epithelial	Adult	L	48	25	MTT	TetrazoliumSalt		10.079		42	10.1016/j.envint.2013.02.013
1275	2013	ZnO	I	Sphere	None	Commercial	Negative	100	243.7	273.4	-8.23	-11.7	SHSY5Y	350000	H	Human	BoneMarrow	Epithelial	Adult	L	48	30	MTT	TetrazoliumSalt		9.0909		42	10.1016/j.envint.2013.02.013
1276	2013	ZnO	I	Sphere	None	Commercial	Negative	100	243.7	273.4	-8.23	-11.7	SHSY5Y	350000	H	Human	BoneMarrow	Epithelial	Adult	L	48	35	MTT	TetrazoliumSalt		7.9051		42	10.1016/j.envint.2013.02.013
1277	2013	ZnO	I	Sphere	None	Commercial	Negative	100	243.7	273.4	-8.23	-11.7	SHSY5Y	350000	H	Human	BoneMarrow	Epithelial	Adult	L	48	40	MTT	TetrazoliumSalt		7.9051		42	10.1016/j.envint.2013.02.013
1278	2013	ZnO	I	Sphere	None	Commercial	Negative	100	243.7	273.4	-8.23	-11.7	SHSY5Y	350000	H	Human	BoneMarrow	Epithelial	Adult	L	3	10	NRU	NeutralRed		101.97		42	10.1016/j.envint.2013.02.013
1279	2013	ZnO	I	Sphere	None	Commercial	Negative	100	243.7	273.4	-8.23	-11.7	SHSY5Y	350000	H	Human	BoneMarrow	Epithelial	Adult	L	3	15	NRU	NeutralRed		92.358		42	10.1016/j.envint.2013.02.013
1280	2013	ZnO	I	Sphere	None	Commercial	Negative	100	243.7	273.4	-8.23	-11.7	SHSY5Y	350000	H	Human	BoneMarrow	Epithelial	Adult	L	3	20	NRU	NeutralRed		86.463		42	10.1016/j.envint.2013.02.013
1281	2013	ZnO	I	Sphere	None	Commercial	Negative	100	243.7	273.4	-8.23	-11.7	SHSY5Y	350000	H	Human	BoneMarrow	Epithelial	Adult	L	3	25	NRU	NeutralRed		65.066		42	10.1016/j.envint.2013.02.013
1282	2013	ZnO	I	Sphere	None	Commercial	Negative	100	243.7	273.4	-8.23	-11.7	SHSY5Y	350000	H	Human	BoneMarrow	Epithelial	Adult	L	3	30	NRU	NeutralRed		56.769		42	10.1016/j.envint.2013.02.013
1283	2013	ZnO	I	Sphere	None	Commercial	Negative	100	243.7	273.4	-8.23	-11.7	SHSY5Y	350000	H	Human	BoneMarrow	Epithelial	Adult	L	3	35	NRU	NeutralRed		56.769		42	10.1016/j.envint.2013.02.013
1284	2013	ZnO	I	Sphere	None	Commercial	Negative	100	243.7	273.4	-8.23	-11.7	SHSY5Y	350000	H	Human	BoneMarrow	Epithelial	Adult	L	3	40	NRU	NeutralRed		50.437		42	10.1016/j.envint.2013.02.013
1285	2013	ZnO	I	Sphere	None	Commercial	Negative	100	243.7	273.4	-8.23	-11.7	SHSY5Y	350000	H	Human	BoneMarrow	Epithelial	Adult	L	3	80	NRU	NeutralRed		61.572		42	10.1016/j.envint.2013.02.013
1286	2013	ZnO	I	Sphere	None	Commercial	Negative	100	243.7	273.4	-8.23	-11.7	SHSY5Y	350000	H	Human	BoneMarrow	Epithelial	Adult	L	6	10	NRU	NeutralRed		104.8		42	10.1016/j.envint.2013.02.013
1287	2013	ZnO	I	Sphere	None	Commercial	Negative	100	243.7	273.4	-8.23	-11.7	SHSY5Y	350000	H	Human	BoneMarrow	Epithelial	Adult	L	6	15	NRU	NeutralRed		100.44		42	10.1016/j.envint.2013.02.013
1288	2013	ZnO	I	Sphere	None	Commercial	Negative	100	243.7	273.4	-8.23	-11.7	SHSY5Y	350000	H	Human	BoneMarrow	Epithelial	Adult	L	6	20	NRU	NeutralRed		105.9		42	10.1016/j.envint.2013.02.013
1289	2013	ZnO	I	Sphere	None	Commercial	Negative	100	243.7	273.4	-8.23	-11.7	SHSY5Y	350000	H	Human	BoneMarrow	Epithelial	Adult	L	6	25	NRU	NeutralRed		76.856		42	10.1016/j.envint.2013.02.013
1290	2013	ZnO	I	Sphere	None	Commercial	Negative	100	243.7	273.4	-8.23	-11.7	SHSY5Y	350000	H	Human	BoneMarrow	Epithelial	Adult	L	6	30	NRU	NeutralRed		60.262		42	10.1016/j.envint.2013.02.013
1291	2013	ZnO	I	Sphere	None	Commercial	Negative	100	243.7	273.4	-8.23	-11.7	SHSY5Y	350000	H	Human	BoneMarrow	Epithelial	Adult	L	6	35	NRU	NeutralRed		56.114		42	10.1016/j.envint.2013.02.013
1292	2013	ZnO	I	Sphere	None	Commercial	Negative	100	243.7	273.4	-8.23	-11.7	SHSY5Y	350000	H	Human	BoneMarrow	Epithelial	Adult	L	6	40	NRU	NeutralRed		53.275		42	10.1016/j.envint.2013.02.013
1293	2013	ZnO	I	Sphere	None	Commercial	Negative	100	243.7	273.4	-8.23	-11.7	SHSY5Y	350000	H	Human	BoneMarrow	Epithelial	Adult	L	6	80	NRU	NeutralRed		59.825		42	10.1016/j.envint.2013.02.013
1294	2013	ZnO	I	Sphere	None	Commercial	Negative	100	243.7	273.4	-8.23	-11.7	SHSY5Y	350000	H	Human	BoneMarrow	Epithelial	Adult	L	24	10	NRU	NeutralRed		104.8		42	10.1016/j.envint.2013.02.013
1295	2013	ZnO	I	Sphere	None	Commercial	Negative	100	243.7	273.4	-8.23	-11.7	SHSY5Y	350000	H	Human	BoneMarrow	Epithelial	Adult	L	24	15	NRU	NeutralRed		100		42	10.1016/j.envint.2013.02.013
1296	2013	ZnO	I	Sphere	None	Commercial	Negative	100	243.7	273.4	-8.23	-11.7	SHSY5Y	350000	H	Human	BoneMarrow	Epithelial	Adult	L	24	20	NRU	NeutralRed		92.795		42	10.1016/j.envint.2013.02.013
1297	2013	ZnO	I	Sphere	None	Commercial	Negative	100	243.7	273.4	-8.23	-11.7	SHSY5Y	350000	H	Human	BoneMarrow	Epithelial	Adult	L	24	25	NRU	NeutralRed		75.109		42	10.1016/j.envint.2013.02.013
1298	2013	ZnO	I	Sphere	None	Commercial	Negative	100	243.7	273.4	-8.23	-11.7	SHSY5Y	350000	H	Human	BoneMarrow	Epithelial	Adult	L	24	30	NRU	NeutralRed		70.742		42	10.1016/j.envint.2013.02.013
1299	2013	ZnO	I	Sphere	None	Commercial	Negative	100	243.7	273.4	-8.23	-11.7	SHSY5Y	350000	H	Human	BoneMarrow	Epithelial	Adult	L	24	35	NRU	NeutralRed		68.996		42	10.1016/j.envint.2013.02.013
1300	2013	ZnO	I	Sphere	None	Commercial	Negative	100	243.7	273.4	-8.23	-11.7	SHSY5Y	350000	H	Human	BoneMarrow	Epithelial	Adult	L	24	40	NRU	NeutralRed		69.432		42	10.1016/j.envint.2013.02.013
1301	2013	ZnO	I	Sphere	None	Commercial	Negative	100	243.7	273.4	-8.23	-11.7	SHSY5Y	350000	H	Human	BoneMarrow	Epithelial	Adult	L	24	80	NRU	NeutralRed		49.345		42	10.1016/j.envint.2013.02.013
1302	2013	ZnO	I	Sphere	None	Commercial	Negative	100	243.7	273.4	-8.23	-11.7	SHSY5Y	350000	H	Human	BoneMarrow	Epithelial	Adult	L	48	10	NRU	NeutralRed		96.288		42	10.1016/j.envint.2013.02.013
1303	2013	ZnO	I	Sphere	None	Commercial	Negative	100	243.7	273.4	-8.23	-11.7	SHSY5Y	350000	H	Human	BoneMarrow	Epithelial	Adult	L	48	15	NRU	NeutralRed		100.44		42	10.1016/j.envint.2013.02.013
1304	2013	ZnO	I	Sphere	None	Commercial	Negative	100	243.7	273.4	-8.23	-11.7	SHSY5Y	350000	H	Human	BoneMarrow	Epithelial	Adult	L	48	20	NRU	NeutralRed		82.314		42	10.1016/j.envint.2013.02.013
1305	2013	ZnO	I	Sphere	None	Commercial	Negative	100	243.7	273.4	-8.23	-11.7	SHSY5Y	350000	H	Human	BoneMarrow	Epithelial	Adult	L	48	25	NRU	NeutralRed		63.755		42	10.1016/j.envint.2013.02.013
1306	2013	ZnO	I	Sphere	None	Commercial	Negative	100	243.7	273.4	-8.23	-11.7	SHSY5Y	350000	H	Human	BoneMarrow	Epithelial	Adult	L	48	30	NRU	NeutralRed		60.262		42	10.1016/j.envint.2013.02.013
1307	2013	ZnO	I	Sphere	None	Commercial	Negative	100	243.7	273.4	-8.23	-11.7	SHSY5Y	350000	H	Human	BoneMarrow	Epithelial	Adult	L	48	35	NRU	NeutralRed		59.607		42	10.1016/j.envint.2013.02.013
1308	2013	ZnO	I	Sphere	None	Commercial	Negative	100	243.7	273.4	-8.23	-11.7	SHSY5Y	350000	H	Human	BoneMarrow	Epithelial	Adult	L	48	40	NRU	NeutralRed		64.192		42	10.1016/j.envint.2013.02.013
1309	2013	ZnO	I	Sphere	None	Commercial	Negative	100	243.7	273.4	-8.23	-11.7	SHSY5Y	350000	H	Human	BoneMarrow	Epithelial	Adult	L	48	80	NRU	NeutralRed		55.677		42	10.1016/j.envint.2013.02.013
1310	2014	ZnO	I	Sphere	None	Commercial	Negative	50		278.8		-11.5	Macrophages	400000	A	Mouse	Peritoneal Cavity	Macrophage	Adult	P	24	1	MTT	TetrazoliumSalt		91.342		43	10.1016/j.tiv.2013.12.004
1311	2014	ZnO	I	Sphere	None	Commercial	Negative	50		278.8		-11.5	Macrophages	400000	A	Mouse	Peritoneal Cavity	Macrophage	Adult	P	24	2.5	MTT	TetrazoliumSalt		61.905		43	10.1016/j.tiv.2013.12.004
1312	2014	ZnO	I	Sphere	None	Commercial	Negative	50		278.8		-11.5	Macrophages	400000	A	Mouse	Peritoneal Cavity	Macrophage	Adult	P	24	5	MTT	TetrazoliumSalt		31.818		43	10.1016/j.tiv.2013.12.004
1313	2014	ZnO	I	Sphere	None	Commercial	Negative	50		278.8		-11.5	Macrophages	400000	A	Mouse	Peritoneal Cavity	Macrophage	Adult	P	24	10	MTT	TetrazoliumSalt		15.152		43	10.1016/j.tiv.2013.12.004
1314	2019	SiO2	I	Sphere	None	Sol-Gel Method		21.8	18.7				HUVEC	100000	H	Human	Umbilical Vein	Endothelial	Embryonic	P	24	5	CVS	CrystalViolet		92.5		44	10.1186/s12951-019-0456-4
1315	2019	SiO2	I	Sphere	None	Sol-Gel Method		21.8	18.7				HUVEC	100000	H	Human	Umbilical Vein	Endothelial	Embryonic	P	24	10	CVS	CrystalViolet		80.208		44	10.1186/s12951-019-0456-4
1316	2019	SiO2	I	Sphere	None	Sol-Gel Method		21.8	18.7				HUVEC	100000	H	Human	Umbilical Vein	Endothelial	Embryonic	P	24	15	CVS	CrystalViolet		63.958		44	10.1186/s12951-019-0456-4
1317	2019	SiO2	I	Sphere	None	Sol-Gel Method		21.8	18.7				HUVEC	100000	H	Human	Umbilical Vein	Endothelial	Embryonic	P	24	20	CVS	CrystalViolet		45.417		44	10.1186/s12951-019-0456-4
1318	2019	SiO2	I	Sphere	None	Sol-Gel Method		21.8	18.7				HUVEC	100000	H	Human	Umbilical Vein	Endothelial	Embryonic	P	24	25	CVS	CrystalViolet		36.458		44	10.1186/s12951-019-0456-4
1319	2019	SiO2	I	Sphere	None	Sol-Gel Method		31.4	30.2				HUVEC	100000	H	Human	Umbilical Vein	Endothelial	Embryonic	P	24	5	CVS	CrystalViolet		97.292		44	10.1186/s12951-019-0456-4
1320	2019	SiO2	I	Sphere	None	Sol-Gel Method		31.4	30.2				HUVEC	100000	H	Human	Umbilical Vein	Endothelial	Embryonic	P	24	10	CVS	CrystalViolet		93.958		44	10.1186/s12951-019-0456-4
1321	2019	SiO2	I	Sphere	None	Sol-Gel Method		31.4	30.2				HUVEC	100000	H	Human	Umbilical Vein	Endothelial	Embryonic	P	24	15	CVS	CrystalViolet		87.083		44	10.1186/s12951-019-0456-4
1322	2019	SiO2	I	Sphere	None	Sol-Gel Method		31.4	30.2				HUVEC	100000	H	Human	Umbilical Vein	Endothelial	Embryonic	P	24	20	CVS	CrystalViolet		82.5		44	10.1186/s12951-019-0456-4
1323	2019	SiO2	I	Sphere	None	Sol-Gel Method		31.4	30.2				HUVEC	100000	H	Human	Umbilical Vein	Endothelial	Embryonic	P	24	25	CVS	CrystalViolet		74.167		44	10.1186/s12951-019-0456-4
1324	2019	SiO2	I	Sphere	None	Sol-Gel Method		56.7	50.4				HUVEC	100000	H	Human	Umbilical Vein	Endothelial	Embryonic	P	24	5	CVS	CrystalViolet		92.5		44	10.1186/s12951-019-0456-4
1325	2019	SiO2	I	Sphere	None	Sol-Gel Method		56.7	50.4				HUVEC	100000	H	Human	Umbilical Vein	Endothelial	Embryonic	P	24	10	CVS	CrystalViolet		90.625		44	10.1186/s12951-019-0456-4
1326	2019	SiO2	I	Sphere	None	Sol-Gel Method		56.7	50.4				HUVEC	100000	H	Human	Umbilical Vein	Endothelial	Embryonic	P	24	15	CVS	CrystalViolet		86.25		44	10.1186/s12951-019-0456-4
1327	2019	SiO2	I	Sphere	None	Sol-Gel Method		56.7	50.4				HUVEC	100000	H	Human	Umbilical Vein	Endothelial	Embryonic	P	24	20	CVS	CrystalViolet		84.167		44	10.1186/s12951-019-0456-4
1328	2019	SiO2	I	Sphere	None	Sol-Gel Method		56.7	50.4				HUVEC	100000	H	Human	Umbilical Vein	Endothelial	Embryonic	P	24	25	CVS	CrystalViolet		79.792		44	10.1186/s12951-019-0456-4
1329	2011	ZnO	I	Sph/Rho/Rod	None	Commercial		71					HepG2	60000	H	Human	Liver	Epithelial	Adult	L	48	10	MTT	TetrazoliumSalt		88.254		45	10.1016/j.scitotenv.2011.07.039
1330	2011	ZnO	I	Sph/Rho/Rod	None	Commercial		71					HepG2	60000	H	Human	Liver	Epithelial	Adult	L	48	25	MTT	TetrazoliumSalt		67.143		45	10.1016/j.scitotenv.2011.07.039
1331	2011	ZnO	I	Sph/Rho/Rod	None	Commercial		71					HepG2	60000	H	Human	Liver	Epithelial	Adult	L	48	50	MTT	TetrazoliumSalt		10		45	10.1016/j.scitotenv.2011.07.039
1332	2011	ZnO	I	Sph/Rho/Rod	None	Commercial		71					HepG2	60000	H	Human	Liver	Epithelial	Adult	L	48	100	MTT	TetrazoliumSalt		11.587		45	10.1016/j.scitotenv.2011.07.039
1333	2011	TiO2	I	Rho/Sph	None	Commercial		42.3					HepG2	60000	H	Human	Liver	Epithelial	Adult	L	48	25	MTT	TetrazoliumSalt		90.794		45	10.1016/j.scitotenv.2011.07.039
1334	2011	TiO2	I	Rho/Sph	None	Commercial		42.3					HepG2	60000	H	Human	Liver	Epithelial	Adult	L	48	50	MTT	TetrazoliumSalt		94.921		45	10.1016/j.scitotenv.2011.07.039
1335	2011	TiO2	I	Rho/Sph	None	Commercial		42.3					HepG2	60000	H	Human	Liver	Epithelial	Adult	L	48	100	MTT	TetrazoliumSalt		115.4		45	10.1016/j.scitotenv.2011.07.039
1336	2011	TiO2	I	Rho/Sph	None	Commercial		42.3					HepG2	60000	H	Human	Liver	Epithelial	Adult	L	48	200	MTT	TetrazoliumSalt		103.17		45	10.1016/j.scitotenv.2011.07.039
1337	2011	CuO	I	Sphere	None	Commercial		28					HepG2	60000	H	Human	Liver	Epithelial	Adult	L	48	5	MTT	TetrazoliumSalt		51.746		45	10.1016/j.scitotenv.2011.07.039
1338	2011	CuO	I	Sphere	None	Commercial		28					HepG2	60000	H	Human	Liver	Epithelial	Adult	L	48	10	MTT	TetrazoliumSalt		38.889		45	10.1016/j.scitotenv.2011.07.039
1339	2011	CuO	I	Sphere	None	Commercial		28					HepG2	60000	H	Human	Liver	Epithelial	Adult	L	48	25	MTT	TetrazoliumSalt		20.317		45	10.1016/j.scitotenv.2011.07.039
1340	2011	CuO	I	Sphere	None	Commercial		28					HepG2	60000	H	Human	Liver	Epithelial	Adult	L	48	50	MTT	TetrazoliumSalt		13.651		45	10.1016/j.scitotenv.2011.07.039
1341	2011	Co3O4	I	Rho/Qua	None	Commercial		78.3					HepG2	60000	H	Human	Liver	Epithelial	Adult	L	48	10	MTT	TetrazoliumSalt		70.635		45	10.1016/j.scitotenv.2011.07.039
1342	2011	Co3O4	I	Rho/Qua	None	Commercial		78.3					HepG2	60000	H	Human	Liver	Epithelial	Adult	L	48	25	MTT	TetrazoliumSalt		42.381		45	10.1016/j.scitotenv.2011.07.039
1343	2011	Co3O4	I	Rho/Qua	None	Commercial		78.3					HepG2	60000	H	Human	Liver	Epithelial	Adult	L	48	50	MTT	TetrazoliumSalt		23.968		45	10.1016/j.scitotenv.2011.07.039
1344	2011	Co3O4	I	Rho/Qua	None	Commercial		78.3					HepG2	60000	H	Human	Liver	Epithelial	Adult	L	48	100	MTT	TetrazoliumSalt		12.063		45	10.1016/j.scitotenv.2011.07.039
1345	2011	ZnO	I	Sph/Rho/Rod	None	Commercial		71					Hepatocytes	60000	A	Catfish	Liver	Epithelial	Adult	P	48	25	MTT	TetrazoliumSalt		90.095		45	10.1016/j.scitotenv.2011.07.039
1346	2011	ZnO	I	Sph/Rho/Rod	None	Commercial		71					Hepatocytes	60000	A	Catfish	Liver	Epithelial	Adult	P	48	50	MTT	TetrazoliumSalt		85.333		45	10.1016/j.scitotenv.2011.07.039
1347	2011	ZnO	I	Sph/Rho/Rod	None	Commercial		71					Hepatocytes	60000	A	Catfish	Liver	Epithelial	Adult	P	48	100	MTT	TetrazoliumSalt		79.429		45	10.1016/j.scitotenv.2011.07.039
1348	2011	ZnO	I	Sph/Rho/Rod	None	Commercial		71					Hepatocytes	60000	A	Catfish	Liver	Epithelial	Adult	P	48	200	MTT	TetrazoliumSalt		55.81		45	10.1016/j.scitotenv.2011.07.039
1349	2011	TiO2	I	Rho/Sph	None	Commercial		42.3					Hepatocytes	60000	A	Catfish	Liver	Epithelial	Adult	P	48	25	MTT	TetrazoliumSalt		100.19		45	10.1016/j.scitotenv.2011.07.039
1350	2011	TiO2	I	Rho/Sph	None	Commercial		42.3					Hepatocytes	60000	A	Catfish	Liver	Epithelial	Adult	P	48	50	MTT	TetrazoliumSalt		93.333		45	10.1016/j.scitotenv.2011.07.039
1351	2011	TiO2	I	Rho/Sph	None	Commercial		42.3					Hepatocytes	60000	A	Catfish	Liver	Epithelial	Adult	P	48	100	MTT	TetrazoliumSalt		120.38		45	10.1016/j.scitotenv.2011.07.039
1352	2011	TiO2	I	Rho/Sph	None	Commercial		42.3					Hepatocytes	60000	A	Catfish	Liver	Epithelial	Adult	P	48	200	MTT	TetrazoliumSalt		96.952		45	10.1016/j.scitotenv.2011.07.039
1353	2011	CuO	I	Sphere	None	Commercial		28					Hepatocytes	60000	A	Catfish	Liver	Epithelial	Adult	P	48	25	MTT	TetrazoliumSalt		89.333		45	10.1016/j.scitotenv.2011.07.039
1354	2011	CuO	I	Sphere	None	Commercial		28					Hepatocytes	60000	A	Catfish	Liver	Epithelial	Adult	P	48	50	MTT	TetrazoliumSalt		90.667		45	10.1016/j.scitotenv.2011.07.039
1355	2011	CuO	I	Sphere	None	Commercial		28					Hepatocytes	60000	A	Catfish	Liver	Epithelial	Adult	P	48	100	MTT	TetrazoliumSalt		67.81		45	10.1016/j.scitotenv.2011.07.039
1356	2011	CuO	I	Sphere	None	Commercial		28					Hepatocytes	60000	A	Catfish	Liver	Epithelial	Adult	P	48	200	MTT	TetrazoliumSalt		48.952		45	10.1016/j.scitotenv.2011.07.039
1357	2011	Co3O4	I	Rho/Qua	None	Commercial		78.3					Hepatocytes	60000	A	Catfish	Liver	Epithelial	Adult	P	48	25	MTT	TetrazoliumSalt		137.9		45	10.1016/j.scitotenv.2011.07.039
1358	2011	Co3O4	I	Rho/Qua	None	Commercial		78.3					Hepatocytes	60000	A	Catfish	Liver	Epithelial	Adult	P	48	50	MTT	TetrazoliumSalt		114.1		45	10.1016/j.scitotenv.2011.07.039
1359	2011	Co3O4	I	Rho/Qua	None	Commercial		78.3					Hepatocytes	60000	A	Catfish	Liver	Epithelial	Adult	P	48	100	MTT	TetrazoliumSalt		82.095		45	10.1016/j.scitotenv.2011.07.039
1360	2011	Co3O4	I	Rho/Qua	None	Commercial		78.3					Hepatocytes	60000	A	Catfish	Liver	Epithelial	Adult	P	48	200	MTT	TetrazoliumSalt		70.095		45	10.1016/j.scitotenv.2011.07.039
1361	2013	TiO2	I	Sphere	None	Commercial	Negative	25		434.1		-7.83	A549	10000	H	Human	Lung	Epithelial	Adult	L	6	1	MTT	TetrazoliumSalt		100.97		46	10.1177/0960327112462725
1362	2013	TiO2	I	Sphere	None	Commercial	Negative	25		434.1		-7.83	A549	10000	H	Human	Lung	Epithelial	Adult	L	6	5	MTT	TetrazoliumSalt		97.742		46	10.1177/0960327112462725
1363	2013	TiO2	I	Sphere	None	Commercial	Negative	25		434.1		-7.83	A549	10000	H	Human	Lung	Epithelial	Adult	L	6	10	MTT	TetrazoliumSalt		95.161		46	10.1177/0960327112462725
1364	2013	TiO2	I	Sphere	None	Commercial	Negative	25		434.1		-7.83	A549	10000	H	Human	Lung	Epithelial	Adult	L	6	50	MTT	TetrazoliumSalt		96.935		46	10.1177/0960327112462725
1365	2013	TiO2	I	Sphere	None	Commercial	Negative	25		434.1		-7.83	A549	10000	H	Human	Lung	Epithelial	Adult	L	6	100	MTT	TetrazoliumSalt		95.161		46	10.1177/0960327112462725
1366	2013	TiO2	I	Sphere	None	Commercial	Negative	25		434.1		-7.83	A549	10000	H	Human	Lung	Epithelial	Adult	L	24	1	MTT	TetrazoliumSalt		97.742		46	10.1177/0960327112462725
1367	2013	TiO2	I	Sphere	None	Commercial	Negative	25		434.1		-7.83	A549	10000	H	Human	Lung	Epithelial	Adult	L	24	5	MTT	TetrazoliumSalt		95.645		46	10.1177/0960327112462725
1368	2013	TiO2	I	Sphere	None	Commercial	Negative	25		434.1		-7.83	A549	10000	H	Human	Lung	Epithelial	Adult	L	24	10	MTT	TetrazoliumSalt		92.19		46	10.1177/0960327112462725
1369	2013	TiO2	I	Sphere	None	Commercial	Negative	25		434.1		-7.83	A549	10000	H	Human	Lung	Epithelial	Adult	L	24	50	MTT	TetrazoliumSalt		87.07		46	10.1177/0960327112462725
1370	2013	TiO2	I	Sphere	None	Commercial	Negative	25		434.1		-7.83	A549	10000	H	Human	Lung	Epithelial	Adult	L	24	100	MTT	TetrazoliumSalt		84.34		46	10.1177/0960327112462725
1371	2013	TiO2	I	Sphere	None	Commercial	Negative	25		434.1		-7.83	A549	10000	H	Human	Lung	Epithelial	Adult	L	48	1	MTT	TetrazoliumSalt		97.742		46	10.1177/0960327112462725
1372	2013	TiO2	I	Sphere	None	Commercial	Negative	25		434.1		-7.83	A549	10000	H	Human	Lung	Epithelial	Adult	L	48	5	MTT	TetrazoliumSalt		92.742		46	10.1177/0960327112462725
1373	2013	TiO2	I	Sphere	None	Commercial	Negative	25		434.1		-7.83	A549	10000	H	Human	Lung	Epithelial	Adult	L	48	10	MTT	TetrazoliumSalt		88.72		46	10.1177/0960327112462725
1374	2013	TiO2	I	Sphere	None	Commercial	Negative	25		434.1		-7.83	A549	10000	H	Human	Lung	Epithelial	Adult	L	48	50	MTT	TetrazoliumSalt		82.34		46	10.1177/0960327112462725
1375	2013	TiO2	I	Sphere	None	Commercial	Negative	25		434.1		-7.83	A549	10000	H	Human	Lung	Epithelial	Adult	L	48	100	MTT	TetrazoliumSalt		78.89		46	10.1177/0960327112462725
1376	2018	TiO2	I	Sphere	None	Commercial	Negative	15.84	124		-43.29		A549	30000	H	Human	Lung	Epithelial	Adult	L	48	0.1	MTT	TetrazoliumSalt		89.374		47	10.1080/01480545.2018.1452930
1377	2018	TiO2	I	Sphere	None	Commercial	Negative	15.84	124		-43.29		A549	30000	H	Human	Lung	Epithelial	Adult	L	48	3	MTT	TetrazoliumSalt		75.089		47	10.1080/01480545.2018.1452930
1378	2018	TiO2	I	Sphere	None	Commercial	Negative	15.84	124		-43.29		A549	30000	H	Human	Lung	Epithelial	Adult	L	48	10	MTT	TetrazoliumSalt		64.109		47	10.1080/01480545.2018.1452930
1379	2018	TiO2	I	Sphere	None	Commercial	Negative	15.84	124		-43.29		A549	30000	H	Human	Lung	Epithelial	Adult	L	48	30	MTT	TetrazoliumSalt		25.4		47	10.1080/01480545.2018.1452930
1380	2018	TiO2	I	Sphere	None	Commercial	Negative	15.84	124		-43.29		A549	30000	H	Human	Lung	Epithelial	Adult	L	48	60	MTT	TetrazoliumSalt		14.71		47	10.1080/01480545.2018.1452930
1381	2018	TiO2	I	Sphere	None	Commercial	Negative	15.84	124		-43.29		A549	30000	H	Human	Lung	Epithelial	Adult	L	48	100	MTT	TetrazoliumSalt		5.51		47	10.1080/01480545.2018.1452930
1382	2018	TiO2	I	Sphere	None	Commercial	Negative	24.59	172		-14.25		A549	30000	H	Human	Lung	Epithelial	Adult	L	48	0.1	MTT	TetrazoliumSalt		91.499		47	10.1080/01480545.2018.1452930
1383	2018	TiO2	I	Sphere	None	Commercial	Negative	24.59	172		-14.25		A549	30000	H	Human	Lung	Epithelial	Adult	L	48	3	MTT	TetrazoliumSalt		80.283		47	10.1080/01480545.2018.1452930
1384	2018	TiO2	I	Sphere	None	Commercial	Negative	24.59	172		-14.25		A549	30000	H	Human	Lung	Epithelial	Adult	L	48	10	MTT	TetrazoliumSalt		64.7		47	10.1080/01480545.2018.1452930
1385	2018	TiO2	I	Sphere	None	Commercial	Negative	24.59	172		-14.25		A549	30000	H	Human	Lung	Epithelial	Adult	L	48	30	MTT	TetrazoliumSalt		30.61		47	10.1080/01480545.2018.1452930
1386	2018	TiO2	I	Sphere	None	Commercial	Negative	24.59	172		-14.25		A549	30000	H	Human	Lung	Epithelial	Adult	L	48	60	MTT	TetrazoliumSalt		16.6		47	10.1080/01480545.2018.1452930
1387	2018	TiO2	I	Sphere	None	Commercial	Negative	24.59	172		-14.25		A549	30000	H	Human	Lung	Epithelial	Adult	L	48	100	MTT	TetrazoliumSalt		8.6		47	10.1080/01480545.2018.1452930
1388	2018	TiO2	I	Sphere	None	Commercial	Negative	81.8	486		-8.6		A549	30000	H	Human	Lung	Epithelial	Adult	L	48	0.1	MTT	TetrazoliumSalt		93.152		47	10.1080/01480545.2018.1452930
1389	2018	TiO2	I	Sphere	None	Commercial	Negative	81.8	486		-8.6		A549	30000	H	Human	Lung	Epithelial	Adult	L	48	3	MTT	TetrazoliumSalt		90.201		47	10.1080/01480545.2018.1452930
1390	2018	TiO2	I	Sphere	None	Commercial	Negative	81.8	486		-8.6		A549	30000	H	Human	Lung	Epithelial	Adult	L	48	10	MTT	TetrazoliumSalt		76.505		47	10.1080/01480545.2018.1452930
1391	2018	TiO2	I	Sphere	None	Commercial	Negative	81.8	486		-8.6		A549	30000	H	Human	Lung	Epithelial	Adult	L	48	30	MTT	TetrazoliumSalt		57.4		47	10.1080/01480545.2018.1452930
1392	2018	TiO2	I	Sphere	None	Commercial	Negative	81.8	486		-8.6		A549	30000	H	Human	Lung	Epithelial	Adult	L	48	60	MTT	TetrazoliumSalt		37.61		47	10.1080/01480545.2018.1452930
1393	2018	TiO2	I	Sphere	None	Commercial	Negative	81.8	486		-8.6		A549	30000	H	Human	Lung	Epithelial	Adult	L	48	100	MTT	TetrazoliumSalt		11.51		47	10.1080/01480545.2018.1452930
1394	2018	TiO2	I	Sphere	None	Commercial	Negative	15.84	124		-43.29		Caco-2	30000	H	Human	Colon	Epithelial	Adult	L	48	0.1	MTT	TetrazoliumSalt		87.557		47	10.1080/01480545.2018.1452930
1395	2018	TiO2	I	Sphere	None	Commercial	Negative	15.84	124		-43.29		Caco-2	30000	H	Human	Colon	Epithelial	Adult	L	48	3	MTT	TetrazoliumSalt		75.452		47	10.1080/01480545.2018.1452930
1396	2018	TiO2	I	Sphere	None	Commercial	Negative	15.84	124		-43.29		Caco-2	30000	H	Human	Colon	Epithelial	Adult	L	48	10	MTT	TetrazoliumSalt		60.52		47	10.1080/01480545.2018.1452930
1397	2018	TiO2	I	Sphere	None	Commercial	Negative	15.84	124		-43.29		Caco-2	30000	H	Human	Colon	Epithelial	Adult	L	48	30	MTT	TetrazoliumSalt		26.4		47	10.1080/01480545.2018.1452930
1398	2018	TiO2	I	Sphere	None	Commercial	Negative	15.84	124		-43.29		Caco-2	30000	H	Human	Colon	Epithelial	Adult	L	48	60	MTT	TetrazoliumSalt		15.11		47	10.1080/01480545.2018.1452930
1399	2018	TiO2	I	Sphere	None	Commercial	Negative	15.84	124		-43.29		Caco-2	30000	H	Human	Colon	Epithelial	Adult	L	48	100	MTT	TetrazoliumSalt		6		47	10.1080/01480545.2018.1452930
1400	2018	TiO2	I	Sphere	None	Commercial	Negative	24.59	172		-14.25		Caco-2	30000	H	Human	Colon	Epithelial	Adult	L	48	0.1	MTT	TetrazoliumSalt		90.724		47	10.1080/01480545.2018.1452930
1401	2018	TiO2	I	Sphere	None	Commercial	Negative	24.59	172		-14.25		Caco-2	30000	H	Human	Colon	Epithelial	Adult	L	48	3	MTT	TetrazoliumSalt		78.394		47	10.1080/01480545.2018.1452930
1402	2018	TiO2	I	Sphere	None	Commercial	Negative	24.59	172		-14.25		Caco-2	30000	H	Human	Colon	Epithelial	Adult	L	48	10	MTT	TetrazoliumSalt		64.706		47	10.1080/01480545.2018.1452930
1403	2018	TiO2	I	Sphere	None	Commercial	Negative	24.59	172		-14.25		Caco-2	30000	H	Human	Colon	Epithelial	Adult	L	48	30	MTT	TetrazoliumSalt		41.17		47	10.1080/01480545.2018.1452930
1404	2018	TiO2	I	Sphere	None	Commercial	Negative	24.59	172		-14.25		Caco-2	30000	H	Human	Colon	Epithelial	Adult	L	48	60	MTT	TetrazoliumSalt		20.61		47	10.1080/01480545.2018.1452930
1405	2018	TiO2	I	Sphere	None	Commercial	Negative	24.59	172		-14.25		Caco-2	30000	H	Human	Colon	Epithelial	Adult	L	48	100	MTT	TetrazoliumSalt		11.425		47	10.1080/01480545.2018.1452930
1406	2018	TiO2	I	Sphere	None	Commercial	Negative	81.8	486		-8.6		Caco-2	30000	H	Human	Colon	Epithelial	Adult	L	48	0.1	MTT	TetrazoliumSalt		91.629		47	10.1080/01480545.2018.1452930
1407	2018	TiO2	I	Sphere	None	Commercial	Negative	81.8	486		-8.6		Caco-2	30000	H	Human	Colon	Epithelial	Adult	L	48	3	MTT	TetrazoliumSalt		87.557		47	10.1080/01480545.2018.1452930
1408	2018	TiO2	I	Sphere	None	Commercial	Negative	81.8	486		-8.6		Caco-2	30000	H	Human	Colon	Epithelial	Adult	L	48	10	MTT	TetrazoliumSalt		78.733		47	10.1080/01480545.2018.1452930
1409	2018	TiO2	I	Sphere	None	Commercial	Negative	81.8	486		-8.6		Caco-2	30000	H	Human	Colon	Epithelial	Adult	L	48	30	MTT	TetrazoliumSalt		46.833		47	10.1080/01480545.2018.1452930
1410	2018	TiO2	I	Sphere	None	Commercial	Negative	81.8	486		-8.6		Caco-2	30000	H	Human	Colon	Epithelial	Adult	L	48	60	MTT	TetrazoliumSalt		31.674		47	10.1080/01480545.2018.1452930
1411	2018	TiO2	I	Sphere	None	Commercial	Negative	81.8	486		-8.6		Caco-2	30000	H	Human	Colon	Epithelial	Adult	L	48	100	MTT	TetrazoliumSalt		15.837		47	10.1080/01480545.2018.1452930
1412	2019	IronOxide	I	Sphere	Silica	Commercial	Negative	114	188			-6.52	HK-2	30000	H	Human	Kidney	Epithelial	Adult	L	24	1	XTT	TetrazoliumSalt		100	0.647	48	10.1016/j.mrgentox.2019.05.015
1413	2019	IronOxide	I	Sphere	Silica	Commercial	Negative	114	188			-6.52	HK-2	30000	H	Human	Kidney	Epithelial	Adult	L	24	5	XTT	TetrazoliumSalt		98.305	0.647	48	10.1016/j.mrgentox.2019.05.015
1414	2019	IronOxide	I	Sphere	Silica	Commercial	Negative	114	188			-6.52	HK-2	30000	H	Human	Kidney	Epithelial	Adult	L	24	25	XTT	TetrazoliumSalt		77.331	0.647	48	10.1016/j.mrgentox.2019.05.015
1415	2019	IronOxide	I	Sphere	Silica	Commercial	Negative	114	188			-6.52	HK-2	30000	H	Human	Kidney	Epithelial	Adult	L	24	50	XTT	TetrazoliumSalt		65.89	0.647	48	10.1016/j.mrgentox.2019.05.015
1416	2019	IronOxide	I	Sphere	Silica	Commercial	Negative	114	188			-6.52	HK-2	30000	H	Human	Kidney	Epithelial	Adult	L	24	100	XTT	TetrazoliumSalt		54.661	0.647	48	10.1016/j.mrgentox.2019.05.015
1417	2019	IronOxide	I	Sphere	Silica	Commercial	Negative	114	188			-6.52	HK-2	30000	H	Human	Kidney	Epithelial	Adult	L	24	200	XTT	TetrazoliumSalt		45.975	0.647	48	10.1016/j.mrgentox.2019.05.015
1418	2019	IronOxide	I	Sphere	Silica	Commercial	Negative	114	188			-6.52	HK-2	30000	H	Human	Kidney	Epithelial	Adult	L	24	400	XTT	TetrazoliumSalt		45.339	0.647	48	10.1016/j.mrgentox.2019.05.015
1419	2019	IronOxide	I	Sphere	Silica-NH2	Commercial	Negative	114	199			-9.77	HK-2	30000	H	Human	Kidney	Epithelial	Adult	L	24	1	XTT	TetrazoliumSalt		106.28	0.845	48	10.1016/j.mrgentox.2019.05.015
1420	2019	IronOxide	I	Sphere	Silica-NH2	Commercial	Negative	114	199			-9.77	HK-2	30000	H	Human	Kidney	Epithelial	Adult	L	24	5	XTT	TetrazoliumSalt		100	0.845	48	10.1016/j.mrgentox.2019.05.015
1421	2019	IronOxide	I	Sphere	Silica-NH2	Commercial	Negative	114	199			-9.77	HK-2	30000	H	Human	Kidney	Epithelial	Adult	L	24	25	XTT	TetrazoliumSalt		91.498	0.845	48	10.1016/j.mrgentox.2019.05.015
1422	2019	IronOxide	I	Sphere	Silica-NH2	Commercial	Negative	114	199			-9.77	HK-2	30000	H	Human	Kidney	Epithelial	Adult	L	24	50	XTT	TetrazoliumSalt		85.83	0.845	48	10.1016/j.mrgentox.2019.05.015
1423	2019	IronOxide	I	Sphere	Silica-NH2	Commercial	Negative	114	199			-9.77	HK-2	30000	H	Human	Kidney	Epithelial	Adult	L	24	100	XTT	TetrazoliumSalt		80.162	0.845	48	10.1016/j.mrgentox.2019.05.015
1424	2019	IronOxide	I	Sphere	Silica-NH2	Commercial	Negative	114	199			-9.77	HK-2	30000	H	Human	Kidney	Epithelial	Adult	L	24	200	XTT	TetrazoliumSalt		69.838	0.845	48	10.1016/j.mrgentox.2019.05.015
1425	2019	IronOxide	I	Sphere	Silica-NH2	Commercial	Negative	114	199			-9.77	HK-2	30000	H	Human	Kidney	Epithelial	Adult	L	24	400	XTT	TetrazoliumSalt		52.227	0.845	48	10.1016/j.mrgentox.2019.05.015
1426	2020	Au	I	Sphere	Citrate	Chemical Reduction				10			HUVEC	15000	H	Human	Umbilical Vein	Endothelial	Embryonic	P	24	50	CCK-8	TetrazoliumSalt		110.02		49	10.2147/IJN.S208225
1427	2020	Au	I	Sphere	Citrate	Chemical Reduction				10			HUVEC	15000	H	Human	Umbilical Vein	Endothelial	Embryonic	P	24	100	CCK-8	TetrazoliumSalt		123.42		49	10.2147/IJN.S208225
1428	2020	Au	I	Sphere	Citrate	Chemical Reduction				10			HUVEC	15000	H	Human	Umbilical Vein	Endothelial	Embryonic	P	24	200	CCK-8	TetrazoliumSalt		111.47		49	10.2147/IJN.S208225
1429	2020	Au	I	Sphere	Citrate	Chemical Reduction				30			HUVEC	15000	H	Human	Umbilical Vein	Endothelial	Embryonic	P	24	50	CCK-8	TetrazoliumSalt		114.7		49	10.2147/IJN.S208225
1430	2020	Au	I	Sphere	Citrate	Chemical Reduction				30			HUVEC	15000	H	Human	Umbilical Vein	Endothelial	Embryonic	P	24	100	CCK-8	TetrazoliumSalt		103.72		49	10.2147/IJN.S208225
1431	2020	Au	I	Sphere	Citrate	Chemical Reduction				30			HUVEC	15000	H	Human	Umbilical Vein	Endothelial	Embryonic	P	24	200	CCK-8	TetrazoliumSalt		108.89		49	10.2147/IJN.S208225
1432	2020	Au	I	Sphere	Citrate	Chemical Reduction				50			HUVEC	15000	H	Human	Umbilical Vein	Endothelial	Embryonic	P	24	50	CCK-8	TetrazoliumSalt		109.37		49	10.2147/IJN.S208225
1433	2020	Au	I	Sphere	Citrate	Chemical Reduction				50			HUVEC	15000	H	Human	Umbilical Vein	Endothelial	Embryonic	P	24	100	CCK-8	TetrazoliumSalt		108.89		49	10.2147/IJN.S208225
1434	2020	Au	I	Sphere	Citrate	Chemical Reduction				50			HUVEC	15000	H	Human	Umbilical Vein	Endothelial	Embryonic	P	24	200	CCK-8	TetrazoliumSalt		116.64		49	10.2147/IJN.S208225
1435	2020	Pt	I	Sphere	Citrate	Commercial		5					HUVEC	15000	H	Human	Umbilical Vein	Endothelial	Embryonic	P	24	0.5	CCK-8	TetrazoliumSalt		91.139		49	10.2147/IJN.S208225
1436	2020	Pt	I	Sphere	Citrate	Commercial		5					HUVEC	15000	H	Human	Umbilical Vein	Endothelial	Embryonic	P	24	1	CCK-8	TetrazoliumSalt		90.416		49	10.2147/IJN.S208225
1437	2020	Pt	I	Sphere	Citrate	Commercial		5					HUVEC	15000	H	Human	Umbilical Vein	Endothelial	Embryonic	P	24	2	CCK-8	TetrazoliumSalt		87.523		49	10.2147/IJN.S208225
1438	2020	Pt	I	Sphere	Citrate	Commercial		5					HUVEC	15000	H	Human	Umbilical Vein	Endothelial	Embryonic	P	24	4	CCK-8	TetrazoliumSalt		73.237		49	10.2147/IJN.S208225
1439	2020	Pt	I	Sphere	Citrate	Commercial		30					HUVEC	15000	H	Human	Umbilical Vein	Endothelial	Embryonic	P	24	0.5	CCK-8	TetrazoliumSalt		90.958		49	10.2147/IJN.S208225
1440	2020	Pt	I	Sphere	Citrate	Commercial		30					HUVEC	15000	H	Human	Umbilical Vein	Endothelial	Embryonic	P	24	1	CCK-8	TetrazoliumSalt		89.873		49	10.2147/IJN.S208225
1441	2020	Pt	I	Sphere	Citrate	Commercial		30					HUVEC	15000	H	Human	Umbilical Vein	Endothelial	Embryonic	P	24	2	CCK-8	TetrazoliumSalt		88.608		49	10.2147/IJN.S208225
1442	2020	Pt	I	Sphere	Citrate	Commercial		30					HUVEC	15000	H	Human	Umbilical Vein	Endothelial	Embryonic	P	24	4	CCK-8	TetrazoliumSalt		87.523		49	10.2147/IJN.S208225
1443	2020	Pt	I	Sphere	Citrate	Commercial		70					HUVEC	15000	H	Human	Umbilical Vein	Endothelial	Embryonic	P	24	0.5	CCK-8	TetrazoliumSalt		98.192		49	10.2147/IJN.S208225
1444	2020	Pt	I	Sphere	Citrate	Commercial		70					HUVEC	15000	H	Human	Umbilical Vein	Endothelial	Embryonic	P	24	1	CCK-8	TetrazoliumSalt		93.49		49	10.2147/IJN.S208225
1445	2020	Pt	I	Sphere	Citrate	Commercial		70					HUVEC	15000	H	Human	Umbilical Vein	Endothelial	Embryonic	P	24	2	CCK-8	TetrazoliumSalt		91.628		49	10.2147/IJN.S208225
1446	2020	Pt	I	Sphere	Citrate	Commercial		70					HUVEC	15000	H	Human	Umbilical Vein	Endothelial	Embryonic	P	24	4	CCK-8	TetrazoliumSalt		89.873		49	10.2147/IJN.S208225
1447	2020	SiO2	I	Sphere	None	Commercial		20		202.37			HUVEC	15000	H	Human	Umbilical Vein	Endothelial	Embryonic	P	24	6.25	CCK-8	TetrazoliumSalt		87.687		49	10.2147/IJN.S208225
1448	2020	SiO2	I	Sphere	None	Commercial		20		202.37			HUVEC	15000	H	Human	Umbilical Vein	Endothelial	Embryonic	P	24	12.5	CCK-8	TetrazoliumSalt		83.582		49	10.2147/IJN.S208225
1449	2020	SiO2	I	Sphere	None	Commercial		20		202.37			HUVEC	15000	H	Human	Umbilical Vein	Endothelial	Embryonic	P	24	25	CCK-8	TetrazoliumSalt		79.291		49	10.2147/IJN.S208225
1450	2020	SiO2	I	Sphere	None	Commercial		20		202.37			HUVEC	15000	H	Human	Umbilical Vein	Endothelial	Embryonic	P	24	50	CCK-8	TetrazoliumSalt		82.276		49	10.2147/IJN.S208225
1451	2020	SiO2	I	Sphere	None	Commercial		50					HUVEC	15000	H	Human	Umbilical Vein	Endothelial	Embryonic	P	24	6.25	CCK-8	TetrazoliumSalt		96.828		49	10.2147/IJN.S208225
1452	2020	SiO2	I	Sphere	None	Commercial		50					HUVEC	15000	H	Human	Umbilical Vein	Endothelial	Embryonic	P	24	12.5	CCK-8	TetrazoliumSalt		94.403		49	10.2147/IJN.S208225
1453	2020	SiO2	I	Sphere	None	Commercial		50					HUVEC	15000	H	Human	Umbilical Vein	Endothelial	Embryonic	P	24	25	CCK-8	TetrazoliumSalt		89.552		49	10.2147/IJN.S208225
1454	2020	SiO2	I	Sphere	None	Commercial		50					HUVEC	15000	H	Human	Umbilical Vein	Endothelial	Embryonic	P	24	50	CCK-8	TetrazoliumSalt		57.649		49	10.2147/IJN.S208225
1455	2020	SiO2	I	Sphere	None	Commercial		100					HUVEC	15000	H	Human	Umbilical Vein	Endothelial	Embryonic	P	24	6.25	CCK-8	TetrazoliumSalt		101.49		49	10.2147/IJN.S208225
1456	2020	SiO2	I	Sphere	None	Commercial		100					HUVEC	15000	H	Human	Umbilical Vein	Endothelial	Embryonic	P	24	12.5	CCK-8	TetrazoliumSalt		102.24		49	10.2147/IJN.S208225
1457	2020	SiO2	I	Sphere	None	Commercial		100					HUVEC	15000	H	Human	Umbilical Vein	Endothelial	Embryonic	P	24	25	CCK-8	TetrazoliumSalt		95.522		49	10.2147/IJN.S208225
1458	2020	SiO2	I	Sphere	None	Commercial		100					HUVEC	15000	H	Human	Umbilical Vein	Endothelial	Embryonic	P	24	50	CCK-8	TetrazoliumSalt		102.8		49	10.2147/IJN.S208225
1459	2020	TiO2	I	Sphere	None	Commercial		25					HUVEC	15000	H	Human	Umbilical Vein	Endothelial	Embryonic	P	24	6.25	CCK-8	TetrazoliumSalt		98.556		49	10.2147/IJN.S208225
1460	2020	TiO2	I	Sphere	None	Commercial		25					HUVEC	15000	H	Human	Umbilical Vein	Endothelial	Embryonic	P	24	12.5	CCK-8	TetrazoliumSalt		94.404		49	10.2147/IJN.S208225
1461	2020	TiO2	I	Sphere	None	Commercial		25					HUVEC	15000	H	Human	Umbilical Vein	Endothelial	Embryonic	P	24	25	CCK-8	TetrazoliumSalt		74.007		49	10.2147/IJN.S208225
1462	2020	TiO2	I	Sphere	None	Commercial		25					HUVEC	15000	H	Human	Umbilical Vein	Endothelial	Embryonic	P	24	50	CCK-8	TetrazoliumSalt		43.863		49	10.2147/IJN.S208225
1463	2020	TiO2	I	Sphere	None	Commercial		30					HUVEC	15000	H	Human	Umbilical Vein	Endothelial	Embryonic	P	24	6.25	CCK-8	TetrazoliumSalt		88.267		49	10.2147/IJN.S208225
1464	2020	TiO2	I	Sphere	None	Commercial		30					HUVEC	15000	H	Human	Umbilical Vein	Endothelial	Embryonic	P	24	12.5	CCK-8	TetrazoliumSalt		79.964		49	10.2147/IJN.S208225
1465	2020	TiO2	I	Sphere	None	Commercial		30					HUVEC	15000	H	Human	Umbilical Vein	Endothelial	Embryonic	P	24	25	CCK-8	TetrazoliumSalt		78.7		49	10.2147/IJN.S208225
1466	2020	TiO2	I	Sphere	None	Commercial		30					HUVEC	15000	H	Human	Umbilical Vein	Endothelial	Embryonic	P	24	50	CCK-8	TetrazoliumSalt		68.592		49	10.2147/IJN.S208225
1467	2020	TiO2	I	Sphere	None	Commercial		80					HUVEC	15000	H	Human	Umbilical Vein	Endothelial	Embryonic	P	24	6.25	CCK-8	TetrazoliumSalt		100.36		49	10.2147/IJN.S208225
1468	2020	TiO2	I	Sphere	None	Commercial		80					HUVEC	15000	H	Human	Umbilical Vein	Endothelial	Embryonic	P	24	12.5	CCK-8	TetrazoliumSalt		99.097		49	10.2147/IJN.S208225
1469	2020	TiO2	I	Sphere	None	Commercial		80					HUVEC	15000	H	Human	Umbilical Vein	Endothelial	Embryonic	P	24	25	CCK-8	TetrazoliumSalt		93.682		49	10.2147/IJN.S208225
1470	2020	TiO2	I	Sphere	None	Commercial		80					HUVEC	15000	H	Human	Umbilical Vein	Endothelial	Embryonic	P	24	50	CCK-8	TetrazoliumSalt		85.921		49	10.2147/IJN.S208225
1471	2020	TiO2	I	Sphere	None	Commercial		100					HUVEC	15000	H	Human	Umbilical Vein	Endothelial	Embryonic	P	24	6.25	CCK-8	TetrazoliumSalt		87.726		49	10.2147/IJN.S208225
1472	2020	TiO2	I	Sphere	None	Commercial		100					HUVEC	15000	H	Human	Umbilical Vein	Endothelial	Embryonic	P	24	12.5	CCK-8	TetrazoliumSalt		93.141		49	10.2147/IJN.S208225
1473	2020	TiO2	I	Sphere	None	Commercial		100					HUVEC	15000	H	Human	Umbilical Vein	Endothelial	Embryonic	P	24	25	CCK-8	TetrazoliumSalt		83.574		49	10.2147/IJN.S208225
1474	2020	TiO2	I	Sphere	None	Commercial		100					HUVEC	15000	H	Human	Umbilical Vein	Endothelial	Embryonic	P	24	50	CCK-8	TetrazoliumSalt		87.184		49	10.2147/IJN.S208225
1475	2020	MWCNT	C	Nanotube	COOH	Oxidation/Sonication				128.5			HUVEC	15000	H	Human	Umbilical Vein	Endothelial	Embryonic	P	24	7.5	CCK-8	TetrazoliumSalt		91.682		49	10.2147/IJN.S208225
1476	2020	MWCNT	C	Nanotube	COOH	Oxidation/Sonication				128.5			HUVEC	15000	H	Human	Umbilical Vein	Endothelial	Embryonic	P	24	15	CCK-8	TetrazoliumSalt		91.682		49	10.2147/IJN.S208225
1477	2020	MWCNT	C	Nanotube	COOH	Oxidation/Sonication				128.5			HUVEC	15000	H	Human	Umbilical Vein	Endothelial	Embryonic	P	24	30	CCK-8	TetrazoliumSalt		92.25		49	10.2147/IJN.S208225
1478	2020	MWCNT	C	Nanotube	COOH	Oxidation/Sonication				128.5			HUVEC	15000	H	Human	Umbilical Vein	Endothelial	Embryonic	P	24	60	CCK-8	TetrazoliumSalt		86.767		49	10.2147/IJN.S208225
1479	2020	IronOxide	I	Sphere	Dextran	Commercial		30.15					HUVEC	15000	H	Human	Umbilical Vein	Endothelial	Embryonic	P	24	30	CCK-8	TetrazoliumSalt		99.258		49	10.2147/IJN.S208225
1480	2020	IronOxide	I	Sphere	Dextran	Commercial		30.15					HUVEC	15000	H	Human	Umbilical Vein	Endothelial	Embryonic	P	24	60	CCK-8	TetrazoliumSalt		96.289		49	10.2147/IJN.S208225
1481	2020	IronOxide	I	Sphere	Dextran	Commercial		30.15					HUVEC	15000	H	Human	Umbilical Vein	Endothelial	Embryonic	P	24	120	CCK-8	TetrazoliumSalt		92.579		49	10.2147/IJN.S208225
1482	2020	IronOxide	I	Sphere	Dextran	Commercial		30.15					HUVEC	15000	H	Human	Umbilical Vein	Endothelial	Embryonic	P	24	240	CCK-8	TetrazoliumSalt		95.547		49	10.2147/IJN.S208225
1483	2020	IronOxide	I	Sphere	DMSA	Commercial		45.3					HUVEC	15000	H	Human	Umbilical Vein	Endothelial	Embryonic	P	24	30	CCK-8	TetrazoliumSalt		97.403		49	10.2147/IJN.S208225
1484	2020	IronOxide	I	Sphere	DMSA	Commercial		45.3					HUVEC	15000	H	Human	Umbilical Vein	Endothelial	Embryonic	P	24	60	CCK-8	TetrazoliumSalt		55.473		49	10.2147/IJN.S208225
1485	2020	IronOxide	I	Sphere	DMSA	Commercial		45.3					HUVEC	15000	H	Human	Umbilical Vein	Endothelial	Embryonic	P	24	120	CCK-8	TetrazoliumSalt		3.8961		49	10.2147/IJN.S208225
1486	2020	IronOxide	I	Sphere	DMSA	Commercial		45.3					HUVEC	15000	H	Human	Umbilical Vein	Endothelial	Embryonic	P	24	240	CCK-8	TetrazoliumSalt		4.4527		49	10.2147/IJN.S208225
1487	2015	Au	I	Sphere	MSA	Chemical Reduction	Negative	1.5	1.8				WA09		H	Human	Embryo	Spindle	Embryonic	L	24	10	Live/Dead	TrypanBlue		15.174		50	10.1002/smll.201502346
1488	2015	Au	I	Sphere	MSA	Chemical Reduction	Negative	4.2	4.2	7.6			WA09		H	Human	Embryo	Spindle	Embryonic	L	24	10	Live/Dead	TrypanBlue		98.172		50	10.1002/smll.201502346
1489	2015	Au	I	Sphere	Citrate	Chemical Reduction	Negative	13.6	18.8	21.2			WA09		H	Human	Embryo	Spindle	Embryonic	L	24	10	Live/Dead	TrypanBlue		103.47		50	10.1002/smll.201502346
1490	2015	Au	I	Sphere	MSA	Chemical Reduction	Negative	1.5	1.8				WA09	100000	H	Human	Embryo	Spindle	Embryonic	L	24	10	MTT	TetrazoliumSalt		14.259		50	10.1002/smll.201502346
1491	2015	Au	I	Sphere	MSA	Chemical Reduction	Negative	4.2	4.2	7.6			WA09	100000	H	Human	Embryo	Spindle	Embryonic	L	24	10	MTT	TetrazoliumSalt		90.494		50	10.1002/smll.201502346
1492	2015	Au	I	Sphere	Citrate	Chemical Reduction	Negative	13.6	18.8	21.2			WA09	100000	H	Human	Embryo	Spindle	Embryonic	L	24	10	MTT	TetrazoliumSalt		79.087		50	10.1002/smll.201502346
1493	2015	Au	I	Sphere	MSA	Chemical Reduction	Negative	1.5	1.8				WA09		H	Human	Embryo	Spindle	Embryonic	L	24	0.001	Live/Dead	TrypanBlue		90.573		50	10.1002/smll.201502346
1494	2015	Au	I	Sphere	MSA	Chemical Reduction	Negative	1.5	1.8				WA09		H	Human	Embryo	Spindle	Embryonic	L	24	0.01	Live/Dead	TrypanBlue		87.616		50	10.1002/smll.201502346
1495	2015	Au	I	Sphere	MSA	Chemical Reduction	Negative	1.5	1.8				WA09		H	Human	Embryo	Spindle	Embryonic	L	24	0.1	Live/Dead	TrypanBlue		75.97		50	10.1002/smll.201502346
1496	2015	Au	I	Sphere	MSA	Chemical Reduction	Negative	1.5	1.8				WA09		H	Human	Embryo	Spindle	Embryonic	L	24	1	Live/Dead	TrypanBlue		56.562		50	10.1002/smll.201502346
1497	2015	Au	I	Sphere	MSA	Chemical Reduction	Negative	1.5	1.8				WA09		H	Human	Embryo	Spindle	Embryonic	L	24	10	Live/Dead	TrypanBlue		0.92421		50	10.1002/smll.201502346
1498	2015	Au	I	Sphere	MSA	Chemical Reduction	Negative	1.5	1.8				WA09	100000	H	Human	Embryo	Spindle	Embryonic	L	24	0.001	MTT	TetrazoliumSalt		80.591		50	10.1002/smll.201502346
1499	2015	Au	I	Sphere	MSA	Chemical Reduction	Negative	1.5	1.8				WA09	100000	H	Human	Embryo	Spindle	Embryonic	L	24	0.01	MTT	TetrazoliumSalt		66.174		50	10.1002/smll.201502346
1500	2015	Au	I	Sphere	MSA	Chemical Reduction	Negative	1.5	1.8				WA09	100000	H	Human	Embryo	Spindle	Embryonic	L	24	0.1	MTT	TetrazoliumSalt		62.477		50	10.1002/smll.201502346
1501	2015	Au	I	Sphere	MSA	Chemical Reduction	Negative	1.5	1.8				WA09	100000	H	Human	Embryo	Spindle	Embryonic	L	24	1	MTT	TetrazoliumSalt		38.078		50	10.1002/smll.201502346
1502	2015	Au	I	Sphere	MSA	Chemical Reduction	Negative	1.5	1.8				WA09	100000	H	Human	Embryo	Spindle	Embryonic	L	24	10	MTT	TetrazoliumSalt		-1.1091		50	10.1002/smll.201502346
1503	2015	Dendrimer	O	Sphere	None	Commercial			0.84				WA09		H	Human	Embryo	Spindle	Embryonic	L	24	10	Live/Dead	TrypanBlue		94.643		50	10.1002/smll.201502346
1504	2015	Dendrimer	O	Sphere	None	Commercial			1.4				WA09		H	Human	Embryo	Spindle	Embryonic	L	24	10	Live/Dead	TrypanBlue		98.214		50	10.1002/smll.201502346
1505	2019	Au	I	Sphere	None	Biosynthesis	Negative	6					HeLa	5000	H	Human	Cervix	Epithelial	Adult	L	24	50	MTT	TetrazoliumSalt		96.19		51	10.1007/s10876-019-01695-5
1506	2019	Au	I	Sphere	None	Biosynthesis	Negative	6					HeLa	5000	H	Human	Cervix	Epithelial	Adult	L	24	100	MTT	TetrazoliumSalt		75.873		51	10.1007/s10876-019-01695-5
1507	2019	Au	I	Sphere	None	Biosynthesis	Negative	6					HeLa	5000	H	Human	Cervix	Epithelial	Adult	L	24	200	MTT	TetrazoliumSalt		47.09		51	10.1007/s10876-019-01695-5
1508	2019	Au	I	Sphere	None	Biosynthesis	Negative	6					HeLa	5000	H	Human	Cervix	Epithelial	Adult	L	24	400	MTT	TetrazoliumSalt		37.249		51	10.1007/s10876-019-01695-5
1509	2019	Au	I	Sph/Hex/Ova	Citrate	Chemical Reduction		12.5					HeLa	5000	H	Human	Cervix	Epithelial	Adult	L	24	50	MTT	TetrazoliumSalt		98.836		51	10.1007/s10876-019-01695-5
1510	2019	Au	I	Sph/Hex/Ova	Citrate	Chemical Reduction		12.5					HeLa	5000	H	Human	Cervix	Epithelial	Adult	L	24	100	MTT	TetrazoliumSalt		89.63		51	10.1007/s10876-019-01695-5
1511	2019	Au	I	Sph/Hex/Ova	Citrate	Chemical Reduction		12.5					HeLa	5000	H	Human	Cervix	Epithelial	Adult	L	24	200	MTT	TetrazoliumSalt		78.836		51	10.1007/s10876-019-01695-5
1512	2019	Au	I	Sph/Hex/Ova	Citrate	Chemical Reduction		12.5					HeLa	5000	H	Human	Cervix	Epithelial	Adult	L	24	400	MTT	TetrazoliumSalt		77.778		51	10.1007/s10876-019-01695-5
1513	2019	Au	I	Sphere	None	Biosynthesis	Negative	6					HEK293	5000	H	Human	Kidney	Epithelial	Embryonic	L	24	50	MTT	TetrazoliumSalt		94.301		51	10.1007/s10876-019-01695-5
1514	2019	Au	I	Sphere	None	Biosynthesis	Negative	6					HEK293	5000	H	Human	Kidney	Epithelial	Embryonic	L	24	100	MTT	TetrazoliumSalt		93.534		51	10.1007/s10876-019-01695-5
1515	2019	Au	I	Sphere	None	Biosynthesis	Negative	6					HEK293	5000	H	Human	Kidney	Epithelial	Embryonic	L	24	200	MTT	TetrazoliumSalt		89.918		51	10.1007/s10876-019-01695-5
1516	2019	Au	I	Sphere	None	Biosynthesis	Negative	6					HEK293	5000	H	Human	Kidney	Epithelial	Embryonic	L	24	400	MTT	TetrazoliumSalt		81.479		51	10.1007/s10876-019-01695-5
1517	2019	Au	I	Sph/Hex/Ova	Citrate	Chemical Reduction		12.5					HEK293	5000	H	Human	Kidney	Epithelial	Embryonic	L	24	50	MTT	TetrazoliumSalt		87.945		51	10.1007/s10876-019-01695-5
1518	2019	Au	I	Sph/Hex/Ova	Citrate	Chemical Reduction		12.5					HEK293	5000	H	Human	Kidney	Epithelial	Embryonic	L	24	100	MTT	TetrazoliumSalt		78.082		51	10.1007/s10876-019-01695-5
1519	2019	Au	I	Sph/Hex/Ova	Citrate	Chemical Reduction		12.5					HEK293	5000	H	Human	Kidney	Epithelial	Embryonic	L	24	200	MTT	TetrazoliumSalt		66.904		51	10.1007/s10876-019-01695-5
1520	2019	Au	I	Sph/Hex/Ova	Citrate	Chemical Reduction		12.5					HEK293	5000	H	Human	Kidney	Epithelial	Embryonic	L	24	400	MTT	TetrazoliumSalt		48.164		51	10.1007/s10876-019-01695-5
1521	2019	Au	I	Sphere	None	Biosynthesis	Negative	6					H1299	5000	H	Human	Lung	Epithelial	Adult	L	24	50	MTT	TetrazoliumSalt		89.18		51	10.1007/s10876-019-01695-5
1522	2019	Au	I	Sphere	None	Biosynthesis	Negative	6					H1299	5000	H	Human	Lung	Epithelial	Adult	L	24	100	MTT	TetrazoliumSalt		72.85		51	10.1007/s10876-019-01695-5
1523	2019	Au	I	Sphere	None	Biosynthesis	Negative	6					H1299	5000	H	Human	Lung	Epithelial	Adult	L	24	200	MTT	TetrazoliumSalt		57.024		51	10.1007/s10876-019-01695-5
1524	2019	Au	I	Sphere	None	Biosynthesis	Negative	6					H1299	5000	H	Human	Lung	Epithelial	Adult	L	24	400	MTT	TetrazoliumSalt		47.125		51	10.1007/s10876-019-01695-5
1525	2019	Au	I	Sph/Hex/Ova	Citrate	Chemical Reduction		12.5					H1299	5000	H	Human	Lung	Epithelial	Adult	L	24	50	MTT	TetrazoliumSalt		90.82		51	10.1007/s10876-019-01695-5
1526	2019	Au	I	Sph/Hex/Ova	Citrate	Chemical Reduction		12.5					H1299	5000	H	Human	Lung	Epithelial	Adult	L	24	100	MTT	TetrazoliumSalt		83.695		51	10.1007/s10876-019-01695-5
1527	2019	Au	I	Sph/Hex/Ova	Citrate	Chemical Reduction		12.5					H1299	5000	H	Human	Lung	Epithelial	Adult	L	24	200	MTT	TetrazoliumSalt		75.687		51	10.1007/s10876-019-01695-5
1528	2019	Au	I	Sph/Hex/Ova	Citrate	Chemical Reduction		12.5					H1299	5000	H	Human	Lung	Epithelial	Adult	L	24	400	MTT	TetrazoliumSalt		71.841		51	10.1007/s10876-019-01695-5
1529	2019	Au	I	Sphere	None	Biosynthesis	Negative	6					MCF-7	5000	H	Human	Breast	Epithelial	Adult	L	24	50	MTT	TetrazoliumSalt		86.145		51	10.1007/s10876-019-01695-5
1530	2019	Au	I	Sphere	None	Biosynthesis	Negative	6					MCF-7	5000	H	Human	Breast	Epithelial	Adult	L	24	100	MTT	TetrazoliumSalt		69.675		51	10.1007/s10876-019-01695-5
1531	2019	Au	I	Sphere	None	Biosynthesis	Negative	6					MCF-7	5000	H	Human	Breast	Epithelial	Adult	L	24	200	MTT	TetrazoliumSalt		43.917		51	10.1007/s10876-019-01695-5
1532	2019	Au	I	Sphere	None	Biosynthesis	Negative	6					MCF-7	5000	H	Human	Breast	Epithelial	Adult	L	24	400	MTT	TetrazoliumSalt		32.09		51	10.1007/s10876-019-01695-5
1533	2019	Au	I	Sph/Hex/Ova	Citrate	Chemical Reduction		12.5					MCF-7	5000	H	Human	Breast	Epithelial	Adult	L	24	50	MTT	TetrazoliumSalt		91.84		51	10.1007/s10876-019-01695-5
1534	2019	Au	I	Sph/Hex/Ova	Citrate	Chemical Reduction		12.5					MCF-7	5000	H	Human	Breast	Epithelial	Adult	L	24	100	MTT	TetrazoliumSalt		84.568		51	10.1007/s10876-019-01695-5
1535	2019	Au	I	Sph/Hex/Ova	Citrate	Chemical Reduction		12.5					MCF-7	5000	H	Human	Breast	Epithelial	Adult	L	24	200	MTT	TetrazoliumSalt		75.632		51	10.1007/s10876-019-01695-5
1536	2019	Au	I	Sph/Hex/Ova	Citrate	Chemical Reduction		12.5					MCF-7	5000	H	Human	Breast	Epithelial	Adult	L	24	400	MTT	TetrazoliumSalt		68.711		51	10.1007/s10876-019-01695-5
1537	2019	Au	I	Sphere	None	Biosynthesis	Negative	6					A549	5000	H	Human	Lung	Epithelial	Adult	L	24	50	MTT	TetrazoliumSalt		78.221		51	10.1007/s10876-019-01695-5
1538	2019	Au	I	Sphere	None	Biosynthesis	Negative	6					A549	5000	H	Human	Lung	Epithelial	Adult	L	24	100	MTT	TetrazoliumSalt		68.798		51	10.1007/s10876-019-01695-5
1539	2019	Au	I	Sphere	None	Biosynthesis	Negative	6					A549	5000	H	Human	Lung	Epithelial	Adult	L	24	200	MTT	TetrazoliumSalt		52.139		51	10.1007/s10876-019-01695-5
1540	2019	Au	I	Sphere	None	Biosynthesis	Negative	6					A549	5000	H	Human	Lung	Epithelial	Adult	L	24	400	MTT	TetrazoliumSalt		30.264		51	10.1007/s10876-019-01695-5
1541	2019	Au	I	Sph/Hex/Ova	Citrate	Chemical Reduction		12.5					A549	5000	H	Human	Lung	Epithelial	Adult	L	24	50	MTT	TetrazoliumSalt		88.654		51	10.1007/s10876-019-01695-5
1542	2019	Au	I	Sph/Hex/Ova	Citrate	Chemical Reduction		12.5					A549	5000	H	Human	Lung	Epithelial	Adult	L	24	100	MTT	TetrazoliumSalt		78.642		51	10.1007/s10876-019-01695-5
1543	2019	Au	I	Sph/Hex/Ova	Citrate	Chemical Reduction		12.5					A549	5000	H	Human	Lung	Epithelial	Adult	L	24	200	MTT	TetrazoliumSalt		67.704		51	10.1007/s10876-019-01695-5
1544	2019	Au	I	Sph/Hex/Ova	Citrate	Chemical Reduction		12.5					A549	5000	H	Human	Lung	Epithelial	Adult	L	24	400	MTT	TetrazoliumSalt		60.805		51	10.1007/s10876-019-01695-5
1545	2019	Ag	I	Sphere	CYS	Chemical Reduction	Negative		8		-56.9		L929	5000	A	Mouse	SubcutaneousConnectiveTissue	Fibroblast	Adult	L	24	1	MTT	TetrazoliumSalt		103.7		52	10.3762/bxiv.2019.15.v1
1546	2019	Ag	I	Sphere	CYS	Chemical Reduction	Negative		8		-56.9		L929	5000	A	Mouse	SubcutaneousConnectiveTissue	Fibroblast	Adult	L	24	5	MTT	TetrazoliumSalt		98.413		52	10.3762/bxiv.2019.15.v1
1547	2019	Ag	I	Sphere	CYS	Chemical Reduction	Negative		8		-56.9		L929	5000	A	Mouse	SubcutaneousConnectiveTissue	Fibroblast	Adult	L	24	10	MTT	TetrazoliumSalt		85.185		52	10.3762/bxiv.2019.15.v1
1548	2019	Ag	I	Sphere	CYS	Chemical Reduction	Negative		8		-56.9		L929	5000	A	Mouse	SubcutaneousConnectiveTissue	Fibroblast	Adult	L	24	25	MTT	TetrazoliumSalt		74.074		52	10.3762/bxiv.2019.15.v1
1549	2019	Ag	I	Sphere	CYS	Chemical Reduction	Negative		8		-56.9		L929	5000	A	Mouse	SubcutaneousConnectiveTissue	Fibroblast	Adult	L	24	50	MTT	TetrazoliumSalt		41.799		52	10.3762/bxiv.2019.15.v1
1550	2019	Ag	I	Sphere	CYS	Chemical Reduction	Negative		8		-56.9		L929	5000	A	Mouse	SubcutaneousConnectiveTissue	Fibroblast	Adult	L	24	75	MTT	TetrazoliumSalt		16.931		52	10.3762/bxiv.2019.15.v1
1551	2019	Ag	I	Sphere	CYS	Chemical Reduction	Negative		8		-56.9		L929	5000	A	Mouse	SubcutaneousConnectiveTissue	Fibroblast	Adult	L	24	100	MTT	TetrazoliumSalt		18.519		52	10.3762/bxiv.2019.15.v1
1552	2019	Ag	I	Sphere	GSH	Chemical Reduction	Negative		6		-50.9		L929	5000	A	Mouse	SubcutaneousConnectiveTissue	Fibroblast	Adult	L	24	1	MTT	TetrazoliumSalt		103.17		52	10.3762/bxiv.2019.15.v1
1553	2019	Ag	I	Sphere	GSH	Chemical Reduction	Negative		6		-50.9		L929	5000	A	Mouse	SubcutaneousConnectiveTissue	Fibroblast	Adult	L	24	5	MTT	TetrazoliumSalt		77.249		52	10.3762/bxiv.2019.15.v1
1554	2019	Ag	I	Sphere	GSH	Chemical Reduction	Negative		6		-50.9		L929	5000	A	Mouse	SubcutaneousConnectiveTissue	Fibroblast	Adult	L	24	10	MTT	TetrazoliumSalt		50.794		52	10.3762/bxiv.2019.15.v1
1555	2019	Ag	I	Sphere	GSH	Chemical Reduction	Negative		6		-50.9		L929	5000	A	Mouse	SubcutaneousConnectiveTissue	Fibroblast	Adult	L	24	25	MTT	TetrazoliumSalt		23.81		52	10.3762/bxiv.2019.15.v1
1556	2019	Ag	I	Sphere	GSH	Chemical Reduction	Negative		6		-50.9		L929	5000	A	Mouse	SubcutaneousConnectiveTissue	Fibroblast	Adult	L	24	50	MTT	TetrazoliumSalt		20.106		52	10.3762/bxiv.2019.15.v1
1557	2019	Ag	I	Sphere	GSH	Chemical Reduction	Negative		6		-50.9		L929	5000	A	Mouse	SubcutaneousConnectiveTissue	Fibroblast	Adult	L	24	75	MTT	TetrazoliumSalt		16.931		52	10.3762/bxiv.2019.15.v1
1558	2019	Ag	I	Sphere	GSH	Chemical Reduction	Negative		6		-50.9		L929	5000	A	Mouse	SubcutaneousConnectiveTissue	Fibroblast	Adult	L	24	100	MTT	TetrazoliumSalt		16.931		52	10.3762/bxiv.2019.15.v1
1559	2019	Au	I	Sphere	CYS	Chemical Reduction	Negative		25.76		-46.8		L929	5000	A	Mouse	SubcutaneousConnectiveTissue	Fibroblast	Adult	L	24	1	MTT	TetrazoliumSalt		105.29		52	10.3762/bxiv.2019.15.v1
1560	2019	Au	I	Sphere	CYS	Chemical Reduction	Negative		25.76		-46.8		L929	5000	A	Mouse	SubcutaneousConnectiveTissue	Fibroblast	Adult	L	24	5	MTT	TetrazoliumSalt		102.65		52	10.3762/bxiv.2019.15.v1
1561	2019	Au	I	Sphere	CYS	Chemical Reduction	Negative		25.76		-46.8		L929	5000	A	Mouse	SubcutaneousConnectiveTissue	Fibroblast	Adult	L	24	10	MTT	TetrazoliumSalt		104.23		52	10.3762/bxiv.2019.15.v1
1562	2019	Au	I	Sphere	CYS	Chemical Reduction	Negative		25.76		-46.8		L929	5000	A	Mouse	SubcutaneousConnectiveTissue	Fibroblast	Adult	L	24	25	MTT	TetrazoliumSalt		96.825		52	10.3762/bxiv.2019.15.v1
1563	2019	Au	I	Sphere	CYS	Chemical Reduction	Negative		25.76		-46.8		L929	5000	A	Mouse	SubcutaneousConnectiveTissue	Fibroblast	Adult	L	24	50	MTT	TetrazoliumSalt		90.476		52	10.3762/bxiv.2019.15.v1
1564	2019	Au	I	Sphere	CYS	Chemical Reduction	Negative		25.76		-46.8		L929	5000	A	Mouse	SubcutaneousConnectiveTissue	Fibroblast	Adult	L	24	100	MTT	TetrazoliumSalt		87.831		52	10.3762/bxiv.2019.15.v1
1565	2019	Au	I	Sphere	CYS	Chemical Reduction	Negative		25.76		-46.8		L929	5000	A	Mouse	SubcutaneousConnectiveTissue	Fibroblast	Adult	L	24	300	MTT	TetrazoliumSalt		69.312		52	10.3762/bxiv.2019.15.v1
1566	2019	Au	I	Sphere	GSH	Chemical Reduction	Negative		43.17		-58		L929	5000	A	Mouse	SubcutaneousConnectiveTissue	Fibroblast	Adult	L	24	1	MTT	TetrazoliumSalt		106.35		52	10.3762/bxiv.2019.15.v1
1567	2019	Au	I	Sphere	GSH	Chemical Reduction	Negative		43.17		-58		L929	5000	A	Mouse	SubcutaneousConnectiveTissue	Fibroblast	Adult	L	24	5	MTT	TetrazoliumSalt		109.52		52	10.3762/bxiv.2019.15.v1
1568	2019	Au	I	Sphere	GSH	Chemical Reduction	Negative		43.17		-58		L929	5000	A	Mouse	SubcutaneousConnectiveTissue	Fibroblast	Adult	L	24	10	MTT	TetrazoliumSalt		106.88		52	10.3762/bxiv.2019.15.v1
1569	2019	Au	I	Sphere	GSH	Chemical Reduction	Negative		43.17		-58		L929	5000	A	Mouse	SubcutaneousConnectiveTissue	Fibroblast	Adult	L	24	25	MTT	TetrazoliumSalt		102.12		52	10.3762/bxiv.2019.15.v1
1570	2019	Au	I	Sphere	GSH	Chemical Reduction	Negative		43.17		-58		L929	5000	A	Mouse	SubcutaneousConnectiveTissue	Fibroblast	Adult	L	24	50	MTT	TetrazoliumSalt		92.063		52	10.3762/bxiv.2019.15.v1
1571	2019	Au	I	Sphere	GSH	Chemical Reduction	Negative		43.17		-58		L929	5000	A	Mouse	SubcutaneousConnectiveTissue	Fibroblast	Adult	L	24	100	MTT	TetrazoliumSalt		95.238		52	10.3762/bxiv.2019.15.v1
1572	2019	Au	I	Sphere	GSH	Chemical Reduction	Negative		43.17		-58		L929	5000	A	Mouse	SubcutaneousConnectiveTissue	Fibroblast	Adult	L	24	300	MTT	TetrazoliumSalt		95.238		52	10.3762/bxiv.2019.15.v1
1573	2019	Au	I	Rod	None	Seed-Mediated Growth Method		18					hFOB1.19	10000	H	Human	Bone	Osteoblast	Fetus	L	24	0.3	MTT	TetrazoliumSalt	2.17	84.876		53	10.1007/s10856-019-6221-2
1574	2019	Au	I	Rod	None	Seed-Mediated Growth Method		18					hFOB1.19	10000	H	Human	Bone	Osteoblast	Fetus	L	24	0.6	MTT	TetrazoliumSalt	2.17	82.008		53	10.1007/s10856-019-6221-2
1575	2019	Au	I	Rod	None	Seed-Mediated Growth Method		18					hFOB1.19	10000	H	Human	Bone	Osteoblast	Fetus	L	24	1.2	MTT	TetrazoliumSalt	2.17	79.27		53	10.1007/s10856-019-6221-2
1576	2019	Au	I	Rod	None	Seed-Mediated Growth Method		18					hFOB1.19	10000	H	Human	Bone	Osteoblast	Fetus	L	24	2.5	MTT	TetrazoliumSalt	2.17	75.88		53	10.1007/s10856-019-6221-2
1577	2019	Au	I	Rod	None	Seed-Mediated Growth Method		18					hFOB1.19	10000	H	Human	Bone	Osteoblast	Fetus	L	24	5	MTT	TetrazoliumSalt	2.17	72.49		53	10.1007/s10856-019-6221-2
1578	2019	Au	I	Star	None	Chemical Reduction		215					hFOB1.19	10000	H	Human	Bone	Osteoblast	Fetus	L	24	0.3	MTT	TetrazoliumSalt		91.265		53	10.1007/s10856-019-6221-2
1579	2019	Au	I	Star	None	Chemical Reduction		215					hFOB1.19	10000	H	Human	Bone	Osteoblast	Fetus	L	24	0.6	MTT	TetrazoliumSalt		90.352		53	10.1007/s10856-019-6221-2
1580	2019	Au	I	Star	None	Chemical Reduction		215					hFOB1.19	10000	H	Human	Bone	Osteoblast	Fetus	L	24	1.2	MTT	TetrazoliumSalt		66.623		53	10.1007/s10856-019-6221-2
1581	2019	Au	I	Star	None	Chemical Reduction		215					hFOB1.19	10000	H	Human	Bone	Osteoblast	Fetus	L	24	2.5	MTT	TetrazoliumSalt		44.329		53	10.1007/s10856-019-6221-2
1582	2019	Au	I	Star	None	Chemical Reduction		215					hFOB1.19	10000	H	Human	Bone	Osteoblast	Fetus	L	24	5	MTT	TetrazoliumSalt		40.808		53	10.1007/s10856-019-6221-2
1583	2019	Au	I	Sphere	None	Chemical Reduction		6.3					hFOB1.19	10000	H	Human	Bone	Osteoblast	Fetus	L	24	0.3	MTT	TetrazoliumSalt		99.739		53	10.1007/s10856-019-6221-2
1584	2019	Au	I	Sphere	None	Chemical Reduction		6.3					hFOB1.19	10000	H	Human	Bone	Osteoblast	Fetus	L	24	0.6	MTT	TetrazoliumSalt		99.087		53	10.1007/s10856-019-6221-2
1585	2019	Au	I	Sphere	None	Chemical Reduction		6.3					hFOB1.19	10000	H	Human	Bone	Osteoblast	Fetus	L	24	1.2	MTT	TetrazoliumSalt		97.523		53	10.1007/s10856-019-6221-2
1586	2019	Au	I	Sphere	None	Chemical Reduction		6.3					hFOB1.19	10000	H	Human	Bone	Osteoblast	Fetus	L	24	2.5	MTT	TetrazoliumSalt		97.262		53	10.1007/s10856-019-6221-2
1587	2019	Au	I	Sphere	None	Chemical Reduction		6.3					hFOB1.19	10000	H	Human	Bone	Osteoblast	Fetus	L	24	5	MTT	TetrazoliumSalt		96.61		53	10.1007/s10856-019-6221-2
1588	2019	Au	I	Rod	None	Seed-Mediated Growth Method		18					hFOB1.19	10000	H	Human	Bone	Osteoblast	Fetus	L	24	0.3	NRU	NeutralRed	2.17	98.705		53	10.1007/s10856-019-6221-2
1589	2019	Au	I	Rod	None	Seed-Mediated Growth Method		18					hFOB1.19	10000	H	Human	Bone	Osteoblast	Fetus	L	24	0.6	NRU	NeutralRed	2.17	100.29		53	10.1007/s10856-019-6221-2
1590	2019	Au	I	Rod	None	Seed-Mediated Growth Method		18					hFOB1.19	10000	H	Human	Bone	Osteoblast	Fetus	L	24	1.2	NRU	NeutralRed	2.17	100.58		53	10.1007/s10856-019-6221-2
1591	2019	Au	I	Rod	None	Seed-Mediated Growth Method		18					hFOB1.19	10000	H	Human	Bone	Osteoblast	Fetus	L	24	2.5	NRU	NeutralRed	2.17	96.547		53	10.1007/s10856-019-6221-2
1592	2019	Au	I	Rod	None	Seed-Mediated Growth Method		18					hFOB1.19	10000	H	Human	Bone	Osteoblast	Fetus	L	24	5	NRU	NeutralRed	2.17	72.806		53	10.1007/s10856-019-6221-2
1593	2019	Au	I	Star	None	Chemical Reduction		215					hFOB1.19	10000	H	Human	Bone	Osteoblast	Fetus	L	24	0.3	NRU	NeutralRed		98.993		53	10.1007/s10856-019-6221-2
1594	2019	Au	I	Star	None	Chemical Reduction		215					hFOB1.19	10000	H	Human	Bone	Osteoblast	Fetus	L	24	0.6	NRU	NeutralRed		84.748		53	10.1007/s10856-019-6221-2
1595	2019	Au	I	Star	None	Chemical Reduction		215					hFOB1.19	10000	H	Human	Bone	Osteoblast	Fetus	L	24	1.2	NRU	NeutralRed		77.41		53	10.1007/s10856-019-6221-2
1596	2019	Au	I	Star	None	Chemical Reduction		215					hFOB1.19	10000	H	Human	Bone	Osteoblast	Fetus	L	24	2.5	NRU	NeutralRed		76.691		53	10.1007/s10856-019-6221-2
1597	2019	Au	I	Star	None	Chemical Reduction		215					hFOB1.19	10000	H	Human	Bone	Osteoblast	Fetus	L	24	5	NRU	NeutralRed		41.727		53	10.1007/s10856-019-6221-2
1598	2019	Au	I	Sphere	None	Chemical Reduction		6.3					hFOB1.19	10000	H	Human	Bone	Osteoblast	Fetus	L	24	0.3	NRU	NeutralRed		100		53	10.1007/s10856-019-6221-2
1599	2019	Au	I	Sphere	None	Chemical Reduction		6.3					hFOB1.19	10000	H	Human	Bone	Osteoblast	Fetus	L	24	0.6	NRU	NeutralRed		100.29		53	10.1007/s10856-019-6221-2
1600	2019	Au	I	Sphere	None	Chemical Reduction		6.3					hFOB1.19	10000	H	Human	Bone	Osteoblast	Fetus	L	24	1.2	NRU	NeutralRed		99.424		53	10.1007/s10856-019-6221-2
1601	2019	Au	I	Sphere	None	Chemical Reduction		6.3					hFOB1.19	10000	H	Human	Bone	Osteoblast	Fetus	L	24	2.5	NRU	NeutralRed		100.29		53	10.1007/s10856-019-6221-2
1602	2019	Au	I	Sphere	None	Chemical Reduction		6.3					hFOB1.19	10000	H	Human	Bone	Osteoblast	Fetus	L	24	5	NRU	NeutralRed		98.705		53	10.1007/s10856-019-6221-2
1603	2019	Au	I	Rod	None	Seed-Mediated Growth Method		18					MG-63	10000	H	Human	Bone	Fibroblast	Adult	L	24	0.3	MTT	TetrazoliumSalt	2.17	94.416		53	10.1007/s10856-019-6221-2
1604	2019	Au	I	Rod	None	Seed-Mediated Growth Method		18					MG-63	10000	H	Human	Bone	Fibroblast	Adult	L	24	0.6	MTT	TetrazoliumSalt	2.17	92.893		53	10.1007/s10856-019-6221-2
1605	2019	Au	I	Rod	None	Seed-Mediated Growth Method		18					MG-63	10000	H	Human	Bone	Fibroblast	Adult	L	24	1.2	MTT	TetrazoliumSalt	2.17	88.198		53	10.1007/s10856-019-6221-2
1606	2019	Au	I	Rod	None	Seed-Mediated Growth Method		18					MG-63	10000	H	Human	Bone	Fibroblast	Adult	L	24	2.5	MTT	TetrazoliumSalt	2.17	64.848		53	10.1007/s10856-019-6221-2
1607	2019	Au	I	Rod	None	Seed-Mediated Growth Method		18					MG-63	10000	H	Human	Bone	Fibroblast	Adult	L	24	5	MTT	TetrazoliumSalt	2.17	66.244		53	10.1007/s10856-019-6221-2
1608	2019	Au	I	Star	None	Chemical Reduction		215					MG-63	10000	H	Human	Bone	Fibroblast	Adult	L	24	0.3	MTT	TetrazoliumSalt		90.355		53	10.1007/s10856-019-6221-2
1609	2019	Au	I	Star	None	Chemical Reduction		215					MG-63	10000	H	Human	Bone	Fibroblast	Adult	L	24	0.6	MTT	TetrazoliumSalt		88.198		53	10.1007/s10856-019-6221-2
1610	2019	Au	I	Star	None	Chemical Reduction		215					MG-63	10000	H	Human	Bone	Fibroblast	Adult	L	24	1.2	MTT	TetrazoliumSalt		83.503		53	10.1007/s10856-019-6221-2
1611	2019	Au	I	Star	None	Chemical Reduction		215					MG-63	10000	H	Human	Bone	Fibroblast	Adult	L	24	2.5	MTT	TetrazoliumSalt		23.223		53	10.1007/s10856-019-6221-2
1612	2019	Au	I	Star	None	Chemical Reduction		215					MG-63	10000	H	Human	Bone	Fibroblast	Adult	L	24	5	MTT	TetrazoliumSalt		13.325		53	10.1007/s10856-019-6221-2
1613	2019	Au	I	Sphere	None	Chemical Reduction		6.3					MG-63	10000	H	Human	Bone	Fibroblast	Adult	L	24	0.3	MTT	TetrazoliumSalt		99.112		53	10.1007/s10856-019-6221-2
1614	2019	Au	I	Sphere	None	Chemical Reduction		6.3					MG-63	10000	H	Human	Bone	Fibroblast	Adult	L	24	0.6	MTT	TetrazoliumSalt		99.112		53	10.1007/s10856-019-6221-2
1615	2019	Au	I	Sphere	None	Chemical Reduction		6.3					MG-63	10000	H	Human	Bone	Fibroblast	Adult	L	24	1.2	MTT	TetrazoliumSalt		99.112		53	10.1007/s10856-019-6221-2
1616	2019	Au	I	Sphere	None	Chemical Reduction		6.3					MG-63	10000	H	Human	Bone	Fibroblast	Adult	L	24	2.5	MTT	TetrazoliumSalt		94.162		53	10.1007/s10856-019-6221-2
1617	2019	Au	I	Sphere	None	Chemical Reduction		6.3					MG-63	10000	H	Human	Bone	Fibroblast	Adult	L	24	5	MTT	TetrazoliumSalt		95.305		53	10.1007/s10856-019-6221-2
1618	2019	Au	I	Rod	None	Seed-Mediated Growth Method		18					MG-63	10000	H	Human	Bone	Fibroblast	Adult	L	24	0.3	NRU	NeutralRed	2.17	95.07		53	10.1007/s10856-019-6221-2
1619	2019	Au	I	Rod	None	Seed-Mediated Growth Method		18					MG-63	10000	H	Human	Bone	Fibroblast	Adult	L	24	0.6	NRU	NeutralRed	2.17	90.645		53	10.1007/s10856-019-6221-2
1620	2019	Au	I	Rod	None	Seed-Mediated Growth Method		18					MG-63	10000	H	Human	Bone	Fibroblast	Adult	L	24	1.2	NRU	NeutralRed	2.17	81.037		53	10.1007/s10856-019-6221-2
1621	2019	Au	I	Rod	None	Seed-Mediated Growth Method		18					MG-63	10000	H	Human	Bone	Fibroblast	Adult	L	24	2.5	NRU	NeutralRed	2.17	80.025		53	10.1007/s10856-019-6221-2
1622	2019	Au	I	Rod	None	Seed-Mediated Growth Method		18					MG-63	10000	H	Human	Bone	Fibroblast	Adult	L	24	5	NRU	NeutralRed	2.17	74.21		53	10.1007/s10856-019-6221-2
1623	2019	Au	I	Star	None	Chemical Reduction		215					MG-63	10000	H	Human	Bone	Fibroblast	Adult	L	24	0.3	NRU	NeutralRed		99.747		53	10.1007/s10856-019-6221-2
1624	2019	Au	I	Star	None	Chemical Reduction		215					MG-63	10000	H	Human	Bone	Fibroblast	Adult	L	24	0.6	NRU	NeutralRed		87.105		53	10.1007/s10856-019-6221-2
1625	2019	Au	I	Star	None	Chemical Reduction		215					MG-63	10000	H	Human	Bone	Fibroblast	Adult	L	24	1.2	NRU	NeutralRed		82.427		53	10.1007/s10856-019-6221-2
1626	2019	Au	I	Star	None	Chemical Reduction		215					MG-63	10000	H	Human	Bone	Fibroblast	Adult	L	24	2.5	NRU	NeutralRed		43.363		53	10.1007/s10856-019-6221-2
1627	2019	Au	I	Star	None	Chemical Reduction		215					MG-63	10000	H	Human	Bone	Fibroblast	Adult	L	24	5	NRU	NeutralRed		26.422		53	10.1007/s10856-019-6221-2
1628	2019	Au	I	Sphere	None	Chemical Reduction		6.3					MG-63	10000	H	Human	Bone	Fibroblast	Adult	L	24	0.3	NRU	NeutralRed		99.747		53	10.1007/s10856-019-6221-2
1629	2019	Au	I	Sphere	None	Chemical Reduction		6.3					MG-63	10000	H	Human	Bone	Fibroblast	Adult	L	24	0.6	NRU	NeutralRed		100		53	10.1007/s10856-019-6221-2
1630	2019	Au	I	Sphere	None	Chemical Reduction		6.3					MG-63	10000	H	Human	Bone	Fibroblast	Adult	L	24	1.2	NRU	NeutralRed		99.494		53	10.1007/s10856-019-6221-2
1631	2019	Au	I	Sphere	None	Chemical Reduction		6.3					MG-63	10000	H	Human	Bone	Fibroblast	Adult	L	24	2.5	NRU	NeutralRed		98.736		53	10.1007/s10856-019-6221-2
1632	2019	Au	I	Sphere	None	Chemical Reduction		6.3					MG-63	10000	H	Human	Bone	Fibroblast	Adult	L	24	5	NRU	NeutralRed		100		53	10.1007/s10856-019-6221-2
1633	2019	Au	I	Rod	None	Seed-Mediated Growth Method		18					143B	10000	H	Human	Bone	Mixed	Adult	L	24	0.3	MTT	TetrazoliumSalt	2.17	84.988		53	10.1007/s10856-019-6221-2
1634	2019	Au	I	Rod	None	Seed-Mediated Growth Method		18					143B	10000	H	Human	Bone	Mixed	Adult	L	24	0.6	MTT	TetrazoliumSalt	2.17	86.849		53	10.1007/s10856-019-6221-2
1635	2019	Au	I	Rod	None	Seed-Mediated Growth Method		18					143B	10000	H	Human	Bone	Mixed	Adult	L	24	1.2	MTT	TetrazoliumSalt	2.17	85.484		53	10.1007/s10856-019-6221-2
1636	2019	Au	I	Rod	None	Seed-Mediated Growth Method		18					143B	10000	H	Human	Bone	Mixed	Adult	L	24	2.5	MTT	TetrazoliumSalt	2.17	70.72		53	10.1007/s10856-019-6221-2
1637	2019	Au	I	Rod	None	Seed-Mediated Growth Method		18					143B	10000	H	Human	Bone	Mixed	Adult	L	24	5	MTT	TetrazoliumSalt	2.17	54.094		53	10.1007/s10856-019-6221-2
1638	2019	Au	I	Star	None	Chemical Reduction		215					143B	10000	H	Human	Bone	Mixed	Adult	L	24	0.3	MTT	TetrazoliumSalt		67.99		53	10.1007/s10856-019-6221-2
1639	2019	Au	I	Star	None	Chemical Reduction		215					143B	10000	H	Human	Bone	Mixed	Adult	L	24	0.6	MTT	TetrazoliumSalt		16.377		53	10.1007/s10856-019-6221-2
1640	2019	Au	I	Star	None	Chemical Reduction		215					143B	10000	H	Human	Bone	Mixed	Adult	L	24	1.2	MTT	TetrazoliumSalt		16.377		53	10.1007/s10856-019-6221-2
1641	2019	Au	I	Star	None	Chemical Reduction		215					143B	10000	H	Human	Bone	Mixed	Adult	L	24	2.5	MTT	TetrazoliumSalt		14.764		53	10.1007/s10856-019-6221-2
1642	2019	Au	I	Star	None	Chemical Reduction		215					143B	10000	H	Human	Bone	Mixed	Adult	L	24	5	MTT	TetrazoliumSalt		13.896		53	10.1007/s10856-019-6221-2
1643	2019	Au	I	Sphere	None	Chemical Reduction		6.3					143B	10000	H	Human	Bone	Mixed	Adult	L	24	0.3	MTT	TetrazoliumSalt		94.541		53	10.1007/s10856-019-6221-2
1644	2019	Au	I	Sphere	None	Chemical Reduction		6.3					143B	10000	H	Human	Bone	Mixed	Adult	L	24	0.6	MTT	TetrazoliumSalt		89.578		53	10.1007/s10856-019-6221-2
1645	2019	Au	I	Sphere	None	Chemical Reduction		6.3					143B	10000	H	Human	Bone	Mixed	Adult	L	24	1.2	MTT	TetrazoliumSalt		89.826		53	10.1007/s10856-019-6221-2
1646	2019	Au	I	Sphere	None	Chemical Reduction		6.3					143B	10000	H	Human	Bone	Mixed	Adult	L	24	2.5	MTT	TetrazoliumSalt		88.834		53	10.1007/s10856-019-6221-2
1647	2019	Au	I	Sphere	None	Chemical Reduction		6.3					143B	10000	H	Human	Bone	Mixed	Adult	L	24	5	MTT	TetrazoliumSalt		86.104		53	10.1007/s10856-019-6221-2
1648	2019	Au	I	Rod	None	Seed-Mediated Growth Method		18					143B	10000	H	Human	Bone	Mixed	Adult	L	24	0.3	NRU	NeutralRed	2.17	101.63		53	10.1007/s10856-019-6221-2
1649	2019	Au	I	Rod	None	Seed-Mediated Growth Method		18					143B	10000	H	Human	Bone	Mixed	Adult	L	24	0.6	NRU	NeutralRed	2.17	98.37		53	10.1007/s10856-019-6221-2
1650	2019	Au	I	Rod	None	Seed-Mediated Growth Method		18					143B	10000	H	Human	Bone	Mixed	Adult	L	24	1.2	NRU	NeutralRed	2.17	98.37		53	10.1007/s10856-019-6221-2
1651	2019	Au	I	Rod	None	Seed-Mediated Growth Method		18					143B	10000	H	Human	Bone	Mixed	Adult	L	24	2.5	NRU	NeutralRed	2.17	87.092		53	10.1007/s10856-019-6221-2
1652	2019	Au	I	Rod	None	Seed-Mediated Growth Method		18					143B	10000	H	Human	Bone	Mixed	Adult	L	24	5	NRU	NeutralRed	2.17	79.348		53	10.1007/s10856-019-6221-2
1653	2019	Au	I	Star	None	Chemical Reduction		215					143B	10000	H	Human	Bone	Mixed	Adult	L	24	0.3	NRU	NeutralRed		97.011		53	10.1007/s10856-019-6221-2
1654	2019	Au	I	Star	None	Chemical Reduction		215					143B	10000	H	Human	Bone	Mixed	Adult	L	24	0.6	NRU	NeutralRed		82.337		53	10.1007/s10856-019-6221-2
1655	2019	Au	I	Star	None	Chemical Reduction		215					143B	10000	H	Human	Bone	Mixed	Adult	L	24	1.2	NRU	NeutralRed		66.168		53	10.1007/s10856-019-6221-2
1656	2019	Au	I	Star	None	Chemical Reduction		215					143B	10000	H	Human	Bone	Mixed	Adult	L	24	2.5	NRU	NeutralRed		26.223		53	10.1007/s10856-019-6221-2
1657	2019	Au	I	Star	None	Chemical Reduction		215					143B	10000	H	Human	Bone	Mixed	Adult	L	24	5	NRU	NeutralRed		17.12		53	10.1007/s10856-019-6221-2
1658	2019	Au	I	Sphere	None	Chemical Reduction		6.3					143B	10000	H	Human	Bone	Mixed	Adult	L	24	0.3	NRU	NeutralRed		102.45		53	10.1007/s10856-019-6221-2
1659	2019	Au	I	Sphere	None	Chemical Reduction		6.3					143B	10000	H	Human	Bone	Mixed	Adult	L	24	0.6	NRU	NeutralRed		101.36		53	10.1007/s10856-019-6221-2
1660	2019	Au	I	Sphere	None	Chemical Reduction		6.3					143B	10000	H	Human	Bone	Mixed	Adult	L	24	1.2	NRU	NeutralRed		103.26		53	10.1007/s10856-019-6221-2
1661	2019	Au	I	Sphere	None	Chemical Reduction		6.3					143B	10000	H	Human	Bone	Mixed	Adult	L	24	2.5	NRU	NeutralRed		102.99		53	10.1007/s10856-019-6221-2
1662	2019	Au	I	Sphere	None	Chemical Reduction		6.3					143B	10000	H	Human	Bone	Mixed	Adult	L	24	5	NRU	NeutralRed		103.26		53	10.1007/s10856-019-6221-2
1663	2012	Au	I	Sphere	Citrate	Chemical Reduction	Negative	18.2	7.3	10.1	-15	-1.2	HepG2	100000	H	Human	Liver	Epithelial	Adult	L	24		MTT	TetrazoliumSalt		84.32		54	10.1016/j.toxlet.2012.09.025
1664	2012	Au	I	Sphere	Citrate	Chemical Reduction	Negative	18.2	7.3	10.1	-15	-1.2	HepG2	100000	H	Human	Liver	Epithelial	Adult	L	24		MTT	TetrazoliumSalt		82.4		54	10.1016/j.toxlet.2012.09.025
1665	2012	Au	I	Sphere	Citrate	Chemical Reduction	Negative	18.2	7.3	10.1	-15	-1.2	HepG2	100000	H	Human	Liver	Epithelial	Adult	L	24		MTT	TetrazoliumSalt		76.8		54	10.1016/j.toxlet.2012.09.025
1666	2012	Au	I	Sphere	Citrate	Chemical Reduction	Negative	18.2	7.3	10.1	-15	-1.2	HepG2	100000	H	Human	Liver	Epithelial	Adult	L	24		MTT	TetrazoliumSalt		76.96		54	10.1016/j.toxlet.2012.09.025
1667	2012	Au	I	Sphere	Citrate	Chemical Reduction	Negative	18.2	7.3	10.1	-15	-1.2	HepG2	100000	H	Human	Liver	Epithelial	Adult	L	24		MTT	TetrazoliumSalt		75.04		54	10.1016/j.toxlet.2012.09.025
1668	2012	Au	I	Sphere	PAMAM	Chemical Reduction	Positive	10.9	7.2	12.1	41	-6.8	HepG2	100000	H	Human	Liver	Epithelial	Adult	L	24		MTT	TetrazoliumSalt		73.487		54	10.1016/j.toxlet.2012.09.025
1669	2012	Au	I	Sphere	PAMAM	Chemical Reduction	Positive	10.9	7.2	12.1	41	-6.8	HepG2	100000	H	Human	Liver	Epithelial	Adult	L	24		MTT	TetrazoliumSalt		70.605		54	10.1016/j.toxlet.2012.09.025
1670	2012	Au	I	Sphere	PAMAM	Chemical Reduction	Positive	10.9	7.2	12.1	41	-6.8	HepG2	100000	H	Human	Liver	Epithelial	Adult	L	24		MTT	TetrazoliumSalt		70.173		54	10.1016/j.toxlet.2012.09.025
1671	2012	Au	I	Sphere	PAMAM	Chemical Reduction	Positive	10.9	7.2	12.1	41	-6.8	HepG2	100000	H	Human	Liver	Epithelial	Adult	L	24		MTT	TetrazoliumSalt		67.291		54	10.1016/j.toxlet.2012.09.025
1672	2012	Au	I	Sphere	PAMAM	Chemical Reduction	Positive	10.9	7.2	12.1	41	-6.8	HepG2	100000	H	Human	Liver	Epithelial	Adult	L	24		MTT	TetrazoliumSalt		52.45		54	10.1016/j.toxlet.2012.09.025
1673	2012	Au	I	Sphere	Citrate	Chemical Reduction	Negative	18.2	7.3	10.1	-15	-1.2	PBMC	100000	H	Human	Blood	Lymphoblast	Adult	P	24		MTT	TetrazoliumSalt		83.913		54	10.1016/j.toxlet.2012.09.025
1674	2012	Au	I	Sphere	Citrate	Chemical Reduction	Negative	18.2	7.3	10.1	-15	-1.2	PBMC	100000	H	Human	Blood	Lymphoblast	Adult	P	24		MTT	TetrazoliumSalt		71.159		54	10.1016/j.toxlet.2012.09.025
1675	2012	Au	I	Sphere	Citrate	Chemical Reduction	Negative	18.2	7.3	10.1	-15	-1.2	PBMC	100000	H	Human	Blood	Lymphoblast	Adult	P	24		MTT	TetrazoliumSalt		70.725		54	10.1016/j.toxlet.2012.09.025
1676	2012	Au	I	Sphere	Citrate	Chemical Reduction	Negative	18.2	7.3	10.1	-15	-1.2	PBMC	100000	H	Human	Blood	Lymphoblast	Adult	P	24		MTT	TetrazoliumSalt		66.087		54	10.1016/j.toxlet.2012.09.025
1677	2012	Au	I	Sphere	Citrate	Chemical Reduction	Negative	18.2	7.3	10.1	-15	-1.2	PBMC	100000	H	Human	Blood	Lymphoblast	Adult	P	24		MTT	TetrazoliumSalt		62.609		54	10.1016/j.toxlet.2012.09.025
1678	2012	Au	I	Sphere	PAMAM	Chemical Reduction	Positive	10.9	7.2	12.1	41	-6.8	PBMC	100000	H	Human	Blood	Lymphoblast	Adult	P	24		MTT	TetrazoliumSalt		75.071		54	10.1016/j.toxlet.2012.09.025
1679	2012	Au	I	Sphere	PAMAM	Chemical Reduction	Positive	10.9	7.2	12.1	41	-6.8	PBMC	100000	H	Human	Blood	Lymphoblast	Adult	P	24		MTT	TetrazoliumSalt		74.786		54	10.1016/j.toxlet.2012.09.025
1680	2012	Au	I	Sphere	PAMAM	Chemical Reduction	Positive	10.9	7.2	12.1	41	-6.8	PBMC	100000	H	Human	Blood	Lymphoblast	Adult	P	24		MTT	TetrazoliumSalt		72.08		54	10.1016/j.toxlet.2012.09.025
1681	2012	Au	I	Sphere	PAMAM	Chemical Reduction	Positive	10.9	7.2	12.1	41	-6.8	PBMC	100000	H	Human	Blood	Lymphoblast	Adult	P	24		MTT	TetrazoliumSalt		67.664		54	10.1016/j.toxlet.2012.09.025
1682	2012	Au	I	Sphere	PAMAM	Chemical Reduction	Positive	10.9	7.2	12.1	41	-6.8	PBMC	100000	H	Human	Blood	Lymphoblast	Adult	P	24		MTT	TetrazoliumSalt		64.957		54	10.1016/j.toxlet.2012.09.025
1683	2016	CuO	I	Sphere	None	Commercial	Positive	28.2	172	214	35.9	-10.5	A549		H	Human	Lung	Epithelial	Adult	L	4	5	CellTiterBlue	AlamarBlue		124.78	0.188	55	10.1186/s12989-016-0160-6
1684	2016	CuO	I	Sphere	None	Commercial	Positive	28.2	172	214	35.9	-10.5	A549		H	Human	Lung	Epithelial	Adult	L	4	10	CellTiterBlue	AlamarBlue		128.04	0.188	55	10.1186/s12989-016-0160-6
1685	2016	CuO	I	Sphere	None	Commercial	Positive	28.2	172	214	35.9	-10.5	A549		H	Human	Lung	Epithelial	Adult	L	4	20	CellTiterBlue	AlamarBlue		126.3	0.188	55	10.1186/s12989-016-0160-6
1686	2016	CuO	I	Sphere	None	Commercial	Positive	28.2	172	214	35.9	-10.5	A549		H	Human	Lung	Epithelial	Adult	L	4	40	CellTiterBlue	AlamarBlue		101.09	0.188	55	10.1186/s12989-016-0160-6
1687	2016	CuO	I	Sphere	None	Commercial	Positive	28.2	172	214	35.9	-10.5	A549		H	Human	Lung	Epithelial	Adult	L	24	5	CellTiterBlue	AlamarBlue		110.22	0.188	55	10.1186/s12989-016-0160-6
1688	2016	CuO	I	Sphere	None	Commercial	Positive	28.2	172	214	35.9	-10.5	A549		H	Human	Lung	Epithelial	Adult	L	24	10	CellTiterBlue	AlamarBlue		98.261	0.188	55	10.1186/s12989-016-0160-6
1689	2016	CuO	I	Sphere	None	Commercial	Positive	28.2	172	214	35.9	-10.5	A549		H	Human	Lung	Epithelial	Adult	L	24	20	CellTiterBlue	AlamarBlue		45.217	0.188	55	10.1186/s12989-016-0160-6
1690	2016	CuO	I	Sphere	None	Commercial	Positive	28.2	172	214	35.9	-10.5	A549		H	Human	Lung	Epithelial	Adult	L	24	40	CellTiterBlue	AlamarBlue		20	0.188	55	10.1186/s12989-016-0160-6
1691	2016	CuO	I	Sphere	None	Commercial	Positive	28.2	172	214	35.9	-10.5	A549		H	Human	Lung	Epithelial	Adult	L	48	5	CellTiterBlue	AlamarBlue		100	0.188	55	10.1186/s12989-016-0160-6
1692	2016	CuO	I	Sphere	None	Commercial	Positive	28.2	172	214	35.9	-10.5	A549		H	Human	Lung	Epithelial	Adult	L	48	10	CellTiterBlue	AlamarBlue		66.739	0.188	55	10.1186/s12989-016-0160-6
1693	2016	CuO	I	Sphere	None	Commercial	Positive	28.2	172	214	35.9	-10.5	A549		H	Human	Lung	Epithelial	Adult	L	48	20	CellTiterBlue	AlamarBlue		17.609	0.188	55	10.1186/s12989-016-0160-6
1694	2016	CuO	I	Sphere	None	Commercial	Positive	28.2	172	214	35.9	-10.5	A549		H	Human	Lung	Epithelial	Adult	L	48	40	CellTiterBlue	AlamarBlue		7.1739	0.188	55	10.1186/s12989-016-0160-6
1695	2019	Ag	I	Wire	None	Commercial	Negative	30			-4.23	-0.87	J774A.1	10000	A	Mouse	Ascites	Macrophage	Adult	L	24	2	MTS	TetrazoliumSalt	250	95.629		56	10.1016/j.chemosphere.2019.124565
1696	2019	Ag	I	Wire	None	Commercial	Negative	30			-4.23	-0.87	J774A.1	10000	A	Mouse	Ascites	Macrophage	Adult	L	24	5	MTS	TetrazoliumSalt	250	86.713		56	10.1016/j.chemosphere.2019.124565
1697	2019	Ag	I	Wire	None	Commercial	Negative	30			-4.23	-0.87	J774A.1	10000	A	Mouse	Ascites	Macrophage	Adult	L	24	10	MTS	TetrazoliumSalt	250	78.322		56	10.1016/j.chemosphere.2019.124565
1698	2019	Ag	I	Wire	None	Commercial	Negative	30			-4.23	-0.87	J774A.1	10000	A	Mouse	Ascites	Macrophage	Adult	L	24	20	MTS	TetrazoliumSalt	250	67.308		56	10.1016/j.chemosphere.2019.124565
1699	2019	Ag	I	Wire	None	Commercial	Negative	30			-4.23	-0.87	J774A.1	10000	A	Mouse	Ascites	Macrophage	Adult	L	24	50	MTS	TetrazoliumSalt	250	56.294		56	10.1016/j.chemosphere.2019.124565
1700	2019	Ag	I	Wire	None	Commercial	Negative	30			-3.85	-0.87	J774A.1	10000	A	Mouse	Ascites	Macrophage	Adult	L	24	2	MTS	TetrazoliumSalt	833	98.776		56	10.1016/j.chemosphere.2019.124565
1701	2019	Ag	I	Wire	None	Commercial	Negative	30			-3.85	-0.87	J774A.1	10000	A	Mouse	Ascites	Macrophage	Adult	L	24	5	MTS	TetrazoliumSalt	833	94.755		56	10.1016/j.chemosphere.2019.124565
1702	2019	Ag	I	Wire	None	Commercial	Negative	30			-3.85	-0.87	J774A.1	10000	A	Mouse	Ascites	Macrophage	Adult	L	24	10	MTS	TetrazoliumSalt	833	88.462		56	10.1016/j.chemosphere.2019.124565
1703	2019	Ag	I	Wire	None	Commercial	Negative	30			-3.85	-0.87	J774A.1	10000	A	Mouse	Ascites	Macrophage	Adult	L	24	20	MTS	TetrazoliumSalt	833	81.993		56	10.1016/j.chemosphere.2019.124565
1704	2019	Ag	I	Wire	None	Commercial	Negative	30			-3.85	-0.87	J774A.1	10000	A	Mouse	Ascites	Macrophage	Adult	L	24	50	MTS	TetrazoliumSalt	833	67.133		56	10.1016/j.chemosphere.2019.124565
1705	2019	Ag	I	Wire	None	Commercial	Negative	30			-3.36	-0.82	J774A.1	10000	A	Mouse	Ascites	Macrophage	Adult	L	24	2	MTS	TetrazoliumSalt	3333	100.7		56	10.1016/j.chemosphere.2019.124565
1706	2019	Ag	I	Wire	None	Commercial	Negative	30			-3.36	-0.82	J774A.1	10000	A	Mouse	Ascites	Macrophage	Adult	L	24	5	MTS	TetrazoliumSalt	3333	97.727		56	10.1016/j.chemosphere.2019.124565
1707	2019	Ag	I	Wire	None	Commercial	Negative	30			-3.36	-0.82	J774A.1	10000	A	Mouse	Ascites	Macrophage	Adult	L	24	10	MTS	TetrazoliumSalt	3333	88.462		56	10.1016/j.chemosphere.2019.124565
1708	2019	Ag	I	Wire	None	Commercial	Negative	30			-3.36	-0.82	J774A.1	10000	A	Mouse	Ascites	Macrophage	Adult	L	24	20	MTS	TetrazoliumSalt	3333	83.042		56	10.1016/j.chemosphere.2019.124565
1709	2019	Ag	I	Wire	None	Commercial	Negative	30			-3.36	-0.82	J774A.1	10000	A	Mouse	Ascites	Macrophage	Adult	L	24	50	MTS	TetrazoliumSalt	3333	73.427		56	10.1016/j.chemosphere.2019.124565
1710	2019	Ag	I	Wire	None	Commercial	Negative	50			-2.49	-0.32	J774A.1	10000	A	Mouse	Ascites	Macrophage	Adult	L	24	2	MTS	TetrazoliumSalt	2000	98.427		56	10.1016/j.chemosphere.2019.124565
1711	2019	Ag	I	Wire	None	Commercial	Negative	50			-2.49	-0.32	J774A.1	10000	A	Mouse	Ascites	Macrophage	Adult	L	24	5	MTS	TetrazoliumSalt	2000	97.028		56	10.1016/j.chemosphere.2019.124565
1712	2019	Ag	I	Wire	None	Commercial	Negative	50			-2.49	-0.32	J774A.1	10000	A	Mouse	Ascites	Macrophage	Adult	L	24	10	MTS	TetrazoliumSalt	2000	90.385		56	10.1016/j.chemosphere.2019.124565
1713	2019	Ag	I	Wire	None	Commercial	Negative	50			-2.49	-0.32	J774A.1	10000	A	Mouse	Ascites	Macrophage	Adult	L	24	20	MTS	TetrazoliumSalt	2000	88.986		56	10.1016/j.chemosphere.2019.124565
1714	2019	Ag	I	Wire	None	Commercial	Negative	50			-2.49	-0.32	J774A.1	10000	A	Mouse	Ascites	Macrophage	Adult	L	24	50	MTS	TetrazoliumSalt	2000	76.224		56	10.1016/j.chemosphere.2019.124565
1715	2019	Ag	I	Wire	None	Commercial	Negative	100			-1.46	-0.25	J774A.1	10000	A	Mouse	Ascites	Macrophage	Adult	L	24	2	MTS	TetrazoliumSalt	1000	102.1		56	10.1016/j.chemosphere.2019.124565
1716	2019	Ag	I	Wire	None	Commercial	Negative	100			-1.46	-0.25	J774A.1	10000	A	Mouse	Ascites	Macrophage	Adult	L	24	5	MTS	TetrazoliumSalt	1000	103.67		56	10.1016/j.chemosphere.2019.124565
1717	2019	Ag	I	Wire	None	Commercial	Negative	100			-1.46	-0.25	J774A.1	10000	A	Mouse	Ascites	Macrophage	Adult	L	24	10	MTS	TetrazoliumSalt	1000	102.8		56	10.1016/j.chemosphere.2019.124565
1718	2019	Ag	I	Wire	None	Commercial	Negative	100			-1.46	-0.25	J774A.1	10000	A	Mouse	Ascites	Macrophage	Adult	L	24	20	MTS	TetrazoliumSalt	1000	99.65		56	10.1016/j.chemosphere.2019.124565
1719	2019	Ag	I	Wire	None	Commercial	Negative	100			-1.46	-0.25	J774A.1	10000	A	Mouse	Ascites	Macrophage	Adult	L	24	50	MTS	TetrazoliumSalt	1000	76.399		56	10.1016/j.chemosphere.2019.124565
1720	2019	SiO2	I	Sphere	None	Soft Templating Method	Negative	120	232.2		-5.21		A549	10000	H	Human	Lung	Epithelial	Adult	L	96	50	MTT	TetrazoliumSalt		91.667		57	10.1016/j.matdes.2019.108187
1721	2019	SiO2	I	Sphere	None	Soft Templating Method	Negative	120	232.2		-5.21		A549	10000	H	Human	Lung	Epithelial	Adult	L	96	100	MTT	TetrazoliumSalt		91.27		57	10.1016/j.matdes.2019.108187
1722	2019	SiO2	I	Sphere	None	Soft Templating Method	Negative	120	232.2		-5.21		A549	10000	H	Human	Lung	Epithelial	Adult	L	96	200	MTT	TetrazoliumSalt		86.111		57	10.1016/j.matdes.2019.108187
1723	2019	SiO2	I	Sphere	None	Soft Templating Method	Negative	120	232.2		-5.21		A549	10000	H	Human	Lung	Epithelial	Adult	L	96	500	MTT	TetrazoliumSalt		83.333		57	10.1016/j.matdes.2019.108187
1724	2019	SiO2	I	Sphere	COOH	Soft Templating Method	Negative	120	109.1		-28.7		A549	10000	H	Human	Lung	Epithelial	Adult	L	96	50	MTT	TetrazoliumSalt		89.431		57	10.1016/j.matdes.2019.108187
1725	2019	SiO2	I	Sphere	COOH	Soft Templating Method	Negative	120	109.1		-28.7		A549	10000	H	Human	Lung	Epithelial	Adult	L	96	100	MTT	TetrazoliumSalt		81.707		57	10.1016/j.matdes.2019.108187
1726	2019	SiO2	I	Sphere	COOH	Soft Templating Method	Negative	120	109.1		-28.7		A549	10000	H	Human	Lung	Epithelial	Adult	L	96	200	MTT	TetrazoliumSalt		81.03		57	10.1016/j.matdes.2019.108187
1727	2019	SiO2	I	Sphere	COOH	Soft Templating Method	Negative	120	109.1		-28.7		A549	10000	H	Human	Lung	Epithelial	Adult	L	96	500	MTT	TetrazoliumSalt		84.959		57	10.1016/j.matdes.2019.108187
1728	2019	SiO2	I	Sphere	None	Soft Templating Method	Negative	120	232.2		-5.21		A2780	10000	H	Human	Ovary	Epithelial	Adult	L	96	50	MTT	TetrazoliumSalt		81.081		57	10.1016/j.matdes.2019.108187
1729	2019	SiO2	I	Sphere	None	Soft Templating Method	Negative	120	232.2		-5.21		A2780	10000	H	Human	Ovary	Epithelial	Adult	L	96	100	MTT	TetrazoliumSalt		83.499		57	10.1016/j.matdes.2019.108187
1730	2019	SiO2	I	Sphere	None	Soft Templating Method	Negative	120	232.2		-5.21		A2780	10000	H	Human	Ovary	Epithelial	Adult	L	96	200	MTT	TetrazoliumSalt		84.637		57	10.1016/j.matdes.2019.108187
1731	2019	SiO2	I	Sphere	None	Soft Templating Method	Negative	120	232.2		-5.21		A2780	10000	H	Human	Ovary	Epithelial	Adult	L	96	500	MTT	TetrazoliumSalt		82.646		57	10.1016/j.matdes.2019.108187
1732	2019	SiO2	I	Sphere	COOH	Soft Templating Method	Negative	120	109.1		-28.7		A2780	10000	H	Human	Ovary	Epithelial	Adult	L	96	50	MTT	TetrazoliumSalt		90.15		57	10.1016/j.matdes.2019.108187
1733	2019	SiO2	I	Sphere	COOH	Soft Templating Method	Negative	120	109.1		-28.7		A2780	10000	H	Human	Ovary	Epithelial	Adult	L	96	100	MTT	TetrazoliumSalt		89.33		57	10.1016/j.matdes.2019.108187
1734	2019	SiO2	I	Sphere	COOH	Soft Templating Method	Negative	120	109.1		-28.7		A2780	10000	H	Human	Ovary	Epithelial	Adult	L	96	200	MTT	TetrazoliumSalt		85.226		57	10.1016/j.matdes.2019.108187
1735	2019	SiO2	I	Sphere	COOH	Soft Templating Method	Negative	120	109.1		-28.7		A2780	10000	H	Human	Ovary	Epithelial	Adult	L	96	500	MTT	TetrazoliumSalt		82.216		57	10.1016/j.matdes.2019.108187
1736	2019	SiO2	I	Sphere	None	Soft Templating Method	Negative	120	232.2		-5.21		MCF-7	10000	H	Human	Breast	Epithelial	Adult	L	96	50	MTT	TetrazoliumSalt		88.514		57	10.1016/j.matdes.2019.108187
1737	2019	SiO2	I	Sphere	None	Soft Templating Method	Negative	120	232.2		-5.21		MCF-7	10000	H	Human	Breast	Epithelial	Adult	L	96	100	MTT	TetrazoliumSalt		86.892		57	10.1016/j.matdes.2019.108187
1738	2019	SiO2	I	Sphere	None	Soft Templating Method	Negative	120	232.2		-5.21		MCF-7	10000	H	Human	Breast	Epithelial	Adult	L	96	200	MTT	TetrazoliumSalt		83.378		57	10.1016/j.matdes.2019.108187
1739	2019	SiO2	I	Sphere	None	Soft Templating Method	Negative	120	232.2		-5.21		MCF-7	10000	H	Human	Breast	Epithelial	Adult	L	96	500	MTT	TetrazoliumSalt		82.973		57	10.1016/j.matdes.2019.108187
1740	2019	SiO2	I	Sphere	COOH	Soft Templating Method	Negative	120	109.1		-28.7		MCF-7	10000	H	Human	Breast	Epithelial	Adult	L	96	50	MTT	TetrazoliumSalt		96.138		57	10.1016/j.matdes.2019.108187
1741	2019	SiO2	I	Sphere	COOH	Soft Templating Method	Negative	120	109.1		-28.7		MCF-7	10000	H	Human	Breast	Epithelial	Adult	L	96	100	MTT	TetrazoliumSalt		90.013		57	10.1016/j.matdes.2019.108187
1742	2019	SiO2	I	Sphere	COOH	Soft Templating Method	Negative	120	109.1		-28.7		MCF-7	10000	H	Human	Breast	Epithelial	Adult	L	96	200	MTT	TetrazoliumSalt		90.679		57	10.1016/j.matdes.2019.108187
1743	2019	SiO2	I	Sphere	COOH	Soft Templating Method	Negative	120	109.1		-28.7		MCF-7	10000	H	Human	Breast	Epithelial	Adult	L	96	500	MTT	TetrazoliumSalt		82.157		57	10.1016/j.matdes.2019.108187
1744	2017	PLGA	O	Sphere	PEG	Precipitation	Negative	90				-22.46	HepG2		H	Human	Liver	Epithelial	Adult	L	24	5	MTT	TetrazoliumSalt		96.51		58	10.1038/s41598-017-07588-9
1745	2017	PLGA	O	Sphere	PEG	Precipitation	Negative	90				-22.46	HepG2		H	Human	Liver	Epithelial	Adult	L	24	10	MTT	TetrazoliumSalt		92.617		58	10.1038/s41598-017-07588-9
1746	2017	PLGA	O	Sphere	PEG	Precipitation	Negative	90				-22.46	HepG2		H	Human	Liver	Epithelial	Adult	L	24	25	MTT	TetrazoliumSalt		90		58	10.1038/s41598-017-07588-9
1747	2017	PLGA	O	Sphere	PEG	Precipitation	Negative	90				-22.46	HepG2		H	Human	Liver	Epithelial	Adult	L	24	50	MTT	TetrazoliumSalt		86.98		58	10.1038/s41598-017-07588-9
1748	2017	PLGA	O	Sphere	PEG	Precipitation	Negative	90				-22.46	HepG2		H	Human	Liver	Epithelial	Adult	L	24	100	MTT	TetrazoliumSalt		84.832		58	10.1038/s41598-017-07588-9
1749	2017	PLGA	O	Sphere	PEG	Precipitation	Negative	90				-22.46	HepG2		H	Human	Liver	Epithelial	Adult	L	24	250	MTT	TetrazoliumSalt		83.96		58	10.1038/s41598-017-07588-9
1750	2017	PLGA	O	Needle	PEG	Precipitation	Negative	30				-24.09	HepG2		H	Human	Liver	Epithelial	Adult	L	24	5	MTT	TetrazoliumSalt	18	93.49		58	10.1038/s41598-017-07588-9
1751	2017	PLGA	O	Needle	PEG	Precipitation	Negative	30				-24.09	HepG2		H	Human	Liver	Epithelial	Adult	L	24	10	MTT	TetrazoliumSalt	18	83.691		58	10.1038/s41598-017-07588-9
1752	2017	PLGA	O	Needle	PEG	Precipitation	Negative	30				-24.09	HepG2		H	Human	Liver	Epithelial	Adult	L	24	25	MTT	TetrazoliumSalt	18	75.906		58	10.1038/s41598-017-07588-9
1753	2017	PLGA	O	Needle	PEG	Precipitation	Negative	30				-24.09	HepG2		H	Human	Liver	Epithelial	Adult	L	24	50	MTT	TetrazoliumSalt	18	64.631		58	10.1038/s41598-017-07588-9
1754	2017	PLGA	O	Needle	PEG	Precipitation	Negative	30				-24.09	HepG2		H	Human	Liver	Epithelial	Adult	L	24	100	MTT	TetrazoliumSalt	18	59.732		58	10.1038/s41598-017-07588-9
1755	2017	PLGA	O	Needle	PEG	Precipitation	Negative	30				-24.09	HepG2		H	Human	Liver	Epithelial	Adult	L	24	250	MTT	TetrazoliumSalt	18	55.906		58	10.1038/s41598-017-07588-9
1756	2017	PLGA	O	Sphere	PEG	Precipitation	Negative	90				-22.46	HeLa		H	Human	Cervix	Epithelial	Adult	L	24	5	MTT	TetrazoliumSalt		100.69		58	10.1038/s41598-017-07588-9
1757	2017	PLGA	O	Sphere	PEG	Precipitation	Negative	90				-22.46	HeLa		H	Human	Cervix	Epithelial	Adult	L	24	10	MTT	TetrazoliumSalt		97.721		58	10.1038/s41598-017-07588-9
1758	2017	PLGA	O	Sphere	PEG	Precipitation	Negative	90				-22.46	HeLa		H	Human	Cervix	Epithelial	Adult	L	24	25	MTT	TetrazoliumSalt		95.866		58	10.1038/s41598-017-07588-9
1759	2017	PLGA	O	Sphere	PEG	Precipitation	Negative	90				-22.46	HeLa		H	Human	Cervix	Epithelial	Adult	L	24	50	MTT	TetrazoliumSalt		94.753		58	10.1038/s41598-017-07588-9
1760	2017	PLGA	O	Sphere	PEG	Precipitation	Negative	90				-22.46	HeLa		H	Human	Cervix	Epithelial	Adult	L	24	100	MTT	TetrazoliumSalt		93.64		58	10.1038/s41598-017-07588-9
1761	2017	PLGA	O	Sphere	PEG	Precipitation	Negative	90				-22.46	HeLa		H	Human	Cervix	Epithelial	Adult	L	24	250	MTT	TetrazoliumSalt		93.428		58	10.1038/s41598-017-07588-9
1762	2017	PLGA	O	Needle	PEG	Precipitation	Negative	30				-24.09	HeLa		H	Human	Cervix	Epithelial	Adult	L	24	5	MTT	TetrazoliumSalt	18	94.064		58	10.1038/s41598-017-07588-9
1763	2017	PLGA	O	Needle	PEG	Precipitation	Negative	30				-24.09	HeLa		H	Human	Cervix	Epithelial	Adult	L	24	10	MTT	TetrazoliumSalt	18	88.71		58	10.1038/s41598-017-07588-9
1764	2017	PLGA	O	Needle	PEG	Precipitation	Negative	30				-24.09	HeLa		H	Human	Cervix	Epithelial	Adult	L	24	25	MTT	TetrazoliumSalt	18	81.979		58	10.1038/s41598-017-07588-9
1765	2017	PLGA	O	Needle	PEG	Precipitation	Negative	30				-24.09	HeLa		H	Human	Cervix	Epithelial	Adult	L	24	50	MTT	TetrazoliumSalt	18	76.625		58	10.1038/s41598-017-07588-9
1766	2017	PLGA	O	Needle	PEG	Precipitation	Negative	30				-24.09	HeLa		H	Human	Cervix	Epithelial	Adult	L	24	100	MTT	TetrazoliumSalt	18	74.134		58	10.1038/s41598-017-07588-9
1767	2017	PLGA	O	Needle	PEG	Precipitation	Negative	30				-24.09	HeLa		H	Human	Cervix	Epithelial	Adult	L	24	250	MTT	TetrazoliumSalt	18	69.629		58	10.1038/s41598-017-07588-9
1768	2015	IronOxide	I	Rod	Urea	Chemical Reduction		150					L929	10000	A	Mouse	SubcutaneousConnectiveTissue	Fibroblast	Adult	L	24	200	MTT	TetrazoliumSalt	0.1	55.577		59	10.1016/j.etp.2015.07.005
1769	2015	IronOxide	I	Rod	Urea	Chemical Reduction		150					L929	10000	A	Mouse	SubcutaneousConnectiveTissue	Fibroblast	Adult	L	24	400	MTT	TetrazoliumSalt	0.1	72.401		59	10.1016/j.etp.2015.07.005
1770	2017	IronOxide	I	Sphere	Dextran	Co-precipitation	Negative	7.5		60		-11	Monocytes	150000	H	Human	Blood	Monocyte	Adult	P	24	10	CCK-8	TetrazoliumSalt		95		60	10.2147/IJN.S135189
1771	2017	IronOxide	I	Sphere	Dextran	Co-precipitation	Negative	7.5		60		-11	Monocytes	150000	H	Human	Blood	Monocyte	Adult	P	24	20	CCK-8	TetrazoliumSalt		93		60	10.2147/IJN.S135189
1772	2017	IronOxide	I	Sphere	Dextran	Co-precipitation	Negative	7.5		60		-11	Monocytes	150000	H	Human	Blood	Monocyte	Adult	P	24	50	CCK-8	TetrazoliumSalt		102.4		60	10.2147/IJN.S135189
1773	2017	IronOxide	I	Sphere	Dextran	Co-precipitation	Negative	7.5		60		-11	Monocytes	150000	H	Human	Blood	Monocyte	Adult	P	24	100	CCK-8	TetrazoliumSalt		99		60	10.2147/IJN.S135189
1774	2017	IronOxide	I	Sphere	Dextran	Co-precipitation	Negative	7.5		60		-11	Monocytes	150000	H	Human	Blood	Monocyte	Adult	P	48	10	CCK-8	TetrazoliumSalt		184.82		60	10.2147/IJN.S135189
1775	2017	IronOxide	I	Sphere	Dextran	Co-precipitation	Negative	7.5		60		-11	Monocytes	150000	H	Human	Blood	Monocyte	Adult	P	48	20	CCK-8	TetrazoliumSalt		221.01		60	10.2147/IJN.S135189
1776	2017	IronOxide	I	Sphere	Dextran	Co-precipitation	Negative	7.5		60		-11	Monocytes	150000	H	Human	Blood	Monocyte	Adult	P	48	50	CCK-8	TetrazoliumSalt		234.63		60	10.2147/IJN.S135189
1777	2017	IronOxide	I	Sphere	Dextran	Co-precipitation	Negative	7.5		60		-11	Monocytes	150000	H	Human	Blood	Monocyte	Adult	P	48	100	CCK-8	TetrazoliumSalt		230.74		60	10.2147/IJN.S135189
1778	2013	SiO2	I	Sphere	None	Soft Templating Method	Negative	55.6		61.8		-25.4	HeLa	6000	H	Human	Cervix	Epithelial	Adult	L	48	10	MTT	TetrazoliumSalt		98.63		61	10.1016/j.talanta.2013.01.037
1779	2013	SiO2	I	Sphere	None	Soft Templating Method	Negative	55.6		61.8		-25.4	HeLa	6000	H	Human	Cervix	Epithelial	Adult	L	48	100	MTT	TetrazoliumSalt		94.894		61	10.1016/j.talanta.2013.01.037
1780	2013	SiO2	I	Sphere	None	Soft Templating Method	Negative	167.8		164.2		-24	HeLa	6000	H	Human	Cervix	Epithelial	Adult	L	48	10	MTT	TetrazoliumSalt		95.641		61	10.1016/j.talanta.2013.01.037
1781	2013	SiO2	I	Sphere	None	Soft Templating Method	Negative	167.8		164.2		-24	HeLa	6000	H	Human	Cervix	Epithelial	Adult	L	48	100	MTT	TetrazoliumSalt		96.887		61	10.1016/j.talanta.2013.01.037
1782	2013	SiO2	I	Sphere	None	Soft Templating Method	Negative	307.6		342		-27.3	HeLa	6000	H	Human	Cervix	Epithelial	Adult	L	48	10	MTT	TetrazoliumSalt		94.894		61	10.1016/j.talanta.2013.01.037
1783	2013	SiO2	I	Sphere	None	Soft Templating Method	Negative	307.6		342		-27.3	HeLa	6000	H	Human	Cervix	Epithelial	Adult	L	48	100	MTT	TetrazoliumSalt		94.894		61	10.1016/j.talanta.2013.01.037
1784	2019	SiO2	I	Sphere	None	Sol-Gel Method	Negative	19.4	229.5		-21.77		A549	40000	H	Human	Lung	Epithelial	Adult	L	24	8	CCK-8	TetrazoliumSalt		101.67	0.196	62	10.1016/j.ecoenv.2019.109770
1785	2019	SiO2	I	Sphere	None	Sol-Gel Method	Negative	19.4	229.5		-21.77		A549	40000	H	Human	Lung	Epithelial	Adult	L	24	16	CCK-8	TetrazoliumSalt		103.04	0.196	62	10.1016/j.ecoenv.2019.109770
1786	2019	SiO2	I	Sphere	None	Sol-Gel Method	Negative	19.4	229.5		-21.77		A549	40000	H	Human	Lung	Epithelial	Adult	L	24	32	CCK-8	TetrazoliumSalt		103.04	0.196	62	10.1016/j.ecoenv.2019.109770
1787	2019	SiO2	I	Sphere	None	Sol-Gel Method	Negative	19.4	229.5		-21.77		A549	40000	H	Human	Lung	Epithelial	Adult	L	24	64	CCK-8	TetrazoliumSalt		104.41	0.196	62	10.1016/j.ecoenv.2019.109770
1788	2019	SiO2	I	Sphere	None	Sol-Gel Method	Negative	19.4	229.5		-21.77		A549	40000	H	Human	Lung	Epithelial	Adult	L	24	128	CCK-8	TetrazoliumSalt		101.67	0.196	62	10.1016/j.ecoenv.2019.109770
1789	2019	SiO2	I	Sphere	None	Sol-Gel Method	Negative	19.4	229.5		-21.77		A549	40000	H	Human	Lung	Epithelial	Adult	L	24	256	CCK-8	TetrazoliumSalt		79.62	0.196	62	10.1016/j.ecoenv.2019.109770
1790	2019	SiO2	I	Sphere	None	Sol-Gel Method	Negative	19.4	229.5		-21.77		16HBE	40000	H	Human	RespiratoryTract	Epithelial	Adult	P	24	8	CCK-8	TetrazoliumSalt		101.06	0.196	62	10.1016/j.ecoenv.2019.109770
1791	2019	SiO2	I	Sphere	None	Sol-Gel Method	Negative	19.4	229.5		-21.77		16HBE	40000	H	Human	RespiratoryTract	Epithelial	Adult	P	24	16	CCK-8	TetrazoliumSalt		102.73	0.196	62	10.1016/j.ecoenv.2019.109770
1792	2019	SiO2	I	Sphere	None	Sol-Gel Method	Negative	19.4	229.5		-21.77		16HBE	40000	H	Human	RespiratoryTract	Epithelial	Adult	P	24	32	CCK-8	TetrazoliumSalt		103.64	0.196	62	10.1016/j.ecoenv.2019.109770
1793	2019	SiO2	I	Sphere	None	Sol-Gel Method	Negative	19.4	229.5		-21.77		16HBE	40000	H	Human	RespiratoryTract	Epithelial	Adult	P	24	64	CCK-8	TetrazoliumSalt		106.22	0.196	62	10.1016/j.ecoenv.2019.109770
1794	2019	SiO2	I	Sphere	None	Sol-Gel Method	Negative	19.4	229.5		-21.77		16HBE	40000	H	Human	RespiratoryTract	Epithelial	Adult	P	24	128	CCK-8	TetrazoliumSalt		72.989	0.196	62	10.1016/j.ecoenv.2019.109770
1795	2019	SiO2	I	Sphere	None	Sol-Gel Method	Negative	19.4	229.5		-21.77		16HBE	40000	H	Human	RespiratoryTract	Epithelial	Adult	P	24	256	CCK-8	TetrazoliumSalt		20.822	0.196	62	10.1016/j.ecoenv.2019.109770
1796	2019	SiO2	I	Sphere	DPPC	Sol-Gel Method	Negative	19.4	889.03		-13.5		A549	40000	H	Human	Lung	Epithelial	Adult	L	24	8	CCK-8	TetrazoliumSalt		98.928	0.895	62	10.1016/j.ecoenv.2019.109770
1797	2019	SiO2	I	Sphere	DPPC	Sol-Gel Method	Negative	19.4	889.03		-13.5		A549	40000	H	Human	Lung	Epithelial	Adult	L	24	16	CCK-8	TetrazoliumSalt		98.622	0.895	62	10.1016/j.ecoenv.2019.109770
1798	2019	SiO2	I	Sphere	DPPC	Sol-Gel Method	Negative	19.4	889.03		-13.5		A549	40000	H	Human	Lung	Epithelial	Adult	L	24	32	CCK-8	TetrazoliumSalt		97.243	0.895	62	10.1016/j.ecoenv.2019.109770
1799	2019	SiO2	I	Sphere	DPPC	Sol-Gel Method	Negative	19.4	889.03		-13.5		A549	40000	H	Human	Lung	Epithelial	Adult	L	24	64	CCK-8	TetrazoliumSalt		98.315	0.895	62	10.1016/j.ecoenv.2019.109770
1800	2019	SiO2	I	Sphere	DPPC	Sol-Gel Method	Negative	19.4	889.03		-13.5		A549	40000	H	Human	Lung	Epithelial	Adult	L	24	128	CCK-8	TetrazoliumSalt		98.622	0.895	62	10.1016/j.ecoenv.2019.109770
1801	2019	SiO2	I	Sphere	DPPC	Sol-Gel Method	Negative	19.4	889.03		-13.5		16HBE	40000	H	Human	RespiratoryTract	Epithelial	Adult	P	24	8	CCK-8	TetrazoliumSalt		93.539	0.895	62	10.1016/j.ecoenv.2019.109770
1802	2019	SiO2	I	Sphere	DPPC	Sol-Gel Method	Negative	19.4	889.03		-13.5		16HBE	40000	H	Human	RespiratoryTract	Epithelial	Adult	P	24	16	CCK-8	TetrazoliumSalt		94.86	0.895	62	10.1016/j.ecoenv.2019.109770
1803	2019	SiO2	I	Sphere	DPPC	Sol-Gel Method	Negative	19.4	889.03		-13.5		16HBE	40000	H	Human	RespiratoryTract	Epithelial	Adult	P	24	32	CCK-8	TetrazoliumSalt		95.448	0.895	62	10.1016/j.ecoenv.2019.109770
1804	2019	SiO2	I	Sphere	DPPC	Sol-Gel Method	Negative	19.4	889.03		-13.5		16HBE	40000	H	Human	RespiratoryTract	Epithelial	Adult	P	24	64	CCK-8	TetrazoliumSalt		98.385	0.895	62	10.1016/j.ecoenv.2019.109770
1805	2019	SiO2	I	Sphere	DPPC	Sol-Gel Method	Negative	19.4	889.03		-13.5		16HBE	40000	H	Human	RespiratoryTract	Epithelial	Adult	P	24	128	CCK-8	TetrazoliumSalt		92.364	0.895	62	10.1016/j.ecoenv.2019.109770
1806	2016	Au	I	Sphere	Citrate	Commercial	Negative	13	21	48	-60.7	-7.7	BALB/c3T3	2000	A	Mouse	Embryo	Fibroblast	Embryonic	L	24	0.028	WST-1	TetrazoliumSalt		83.921		63	10.1016/j.tiv.2016.09.012
1807	2016	Au	I	Sphere	Citrate	Commercial	Negative	13	21	48	-60.7	-7.7	BALB/c3T3	2000	A	Mouse	Embryo	Fibroblast	Embryonic	L	24	0.061	WST-1	TetrazoliumSalt		83.357		63	10.1016/j.tiv.2016.09.012
1808	2016	Au	I	Sphere	Citrate	Commercial	Negative	13	21	48	-60.7	-7.7	BALB/c3T3	2000	A	Mouse	Embryo	Fibroblast	Embryonic	L	24	0.131	WST-1	TetrazoliumSalt		88.011		63	10.1016/j.tiv.2016.09.012
1809	2016	Au	I	Sphere	Citrate	Commercial	Negative	13	21	48	-60.7	-7.7	BALB/c3T3	2000	A	Mouse	Embryo	Fibroblast	Embryonic	L	24	0.281	WST-1	TetrazoliumSalt		91.537		63	10.1016/j.tiv.2016.09.012
1810	2016	Au	I	Sphere	Citrate	Commercial	Negative	13	21	48	-60.7	-7.7	BALB/c3T3	2000	A	Mouse	Embryo	Fibroblast	Embryonic	L	24	0.604	WST-1	TetrazoliumSalt		92.102		63	10.1016/j.tiv.2016.09.012
1811	2016	Au	I	Sphere	Citrate	Commercial	Negative	13	21	48	-60.7	-7.7	BALB/c3T3	2000	A	Mouse	Embryo	Fibroblast	Embryonic	L	24	1.298	WST-1	TetrazoliumSalt		93.371		63	10.1016/j.tiv.2016.09.012
1812	2016	Au	I	Sphere	Citrate	Commercial	Negative	13	21	48	-60.7	-7.7	BALB/c3T3	2000	A	Mouse	Embryo	Fibroblast	Embryonic	L	24	2.791	WST-1	TetrazoliumSalt		95.769		63	10.1016/j.tiv.2016.09.012
1813	2016	Au	I	Sphere	Citrate	Commercial	Negative	13	21	48	-60.7	-7.7	BALB/c3T3	2000	A	Mouse	Embryo	Fibroblast	Embryonic	L	24	6	WST-1	TetrazoliumSalt		71.227		63	10.1016/j.tiv.2016.09.012
1814	2016	Au	I	Sphere	Citrate	Commercial	Negative	13	21	48	-60.7	-7.7	BALB/c3T3	2000	A	Mouse	Embryo	Fibroblast	Embryonic	L	48	0.028	NRU	NeutralRed		99.577		63	10.1016/j.tiv.2016.09.012
1815	2016	Au	I	Sphere	Citrate	Commercial	Negative	13	21	48	-60.7	-7.7	BALB/c3T3	2000	A	Mouse	Embryo	Fibroblast	Embryonic	L	48	0.061	NRU	NeutralRed		96.897		63	10.1016/j.tiv.2016.09.012
1816	2016	Au	I	Sphere	Citrate	Commercial	Negative	13	21	48	-60.7	-7.7	BALB/c3T3	2000	A	Mouse	Embryo	Fibroblast	Embryonic	L	48	0.131	NRU	NeutralRed		95.769		63	10.1016/j.tiv.2016.09.012
1817	2016	Au	I	Sphere	Citrate	Commercial	Negative	13	21	48	-60.7	-7.7	BALB/c3T3	2000	A	Mouse	Embryo	Fibroblast	Embryonic	L	48	0.281	NRU	NeutralRed		97.884		63	10.1016/j.tiv.2016.09.012
1818	2016	Au	I	Sphere	Citrate	Commercial	Negative	13	21	48	-60.7	-7.7	BALB/c3T3	2000	A	Mouse	Embryo	Fibroblast	Embryonic	L	48	0.604	NRU	NeutralRed		95.346		63	10.1016/j.tiv.2016.09.012
1819	2016	Au	I	Sphere	Citrate	Commercial	Negative	13	21	48	-60.7	-7.7	BALB/c3T3	2000	A	Mouse	Embryo	Fibroblast	Embryonic	L	48	1.298	NRU	NeutralRed		97.461		63	10.1016/j.tiv.2016.09.012
1820	2016	Au	I	Sphere	Citrate	Commercial	Negative	13	21	48	-60.7	-7.7	BALB/c3T3	2000	A	Mouse	Embryo	Fibroblast	Embryonic	L	48	2.791	NRU	NeutralRed		95.769		63	10.1016/j.tiv.2016.09.012
1821	2016	Au	I	Sphere	Citrate	Commercial	Negative	13	21	48	-60.7	-7.7	BALB/c3T3	2000	A	Mouse	Embryo	Fibroblast	Embryonic	L	48	6	NRU	NeutralRed		100.71		63	10.1016/j.tiv.2016.09.012
1822	2016	Au	I	Sphere	Citrate	Commercial	Negative	13	21	52	-60.7	-9.3	NR8383	12000	A	Rat	Lung	Macrophage	Adult	L	24	0.028	WST-1	TetrazoliumSalt		86.46		63	10.1016/j.tiv.2016.09.012
1823	2016	Au	I	Sphere	Citrate	Commercial	Negative	13	21	52	-60.7	-9.3	NR8383	12000	A	Rat	Lung	Macrophage	Adult	L	24	0.061	WST-1	TetrazoliumSalt		80.395		63	10.1016/j.tiv.2016.09.012
1824	2016	Au	I	Sphere	Citrate	Commercial	Negative	13	21	52	-60.7	-9.3	NR8383	12000	A	Rat	Lung	Macrophage	Adult	L	24	0.131	WST-1	TetrazoliumSalt		82.37		63	10.1016/j.tiv.2016.09.012
1825	2016	Au	I	Sphere	Citrate	Commercial	Negative	13	21	52	-60.7	-9.3	NR8383	12000	A	Rat	Lung	Macrophage	Adult	L	24	0.281	WST-1	TetrazoliumSalt		87.729		63	10.1016/j.tiv.2016.09.012
1826	2016	Au	I	Sphere	Citrate	Commercial	Negative	13	21	52	-60.7	-9.3	NR8383	12000	A	Rat	Lung	Macrophage	Adult	L	24	0.604	WST-1	TetrazoliumSalt		82.793		63	10.1016/j.tiv.2016.09.012
1827	2016	Au	I	Sphere	Citrate	Commercial	Negative	13	21	52	-60.7	-9.3	NR8383	12000	A	Rat	Lung	Macrophage	Adult	L	24	1.298	WST-1	TetrazoliumSalt		82.087		63	10.1016/j.tiv.2016.09.012
1828	2016	Au	I	Sphere	Citrate	Commercial	Negative	13	21	52	-60.7	-9.3	NR8383	12000	A	Rat	Lung	Macrophage	Adult	L	24	2.791	WST-1	TetrazoliumSalt		77.715		63	10.1016/j.tiv.2016.09.012
1829	2016	Au	I	Sphere	Citrate	Commercial	Negative	13	21	52	-60.7	-9.3	NR8383	12000	A	Rat	Lung	Macrophage	Adult	L	24	6	WST-1	TetrazoliumSalt		74.189		63	10.1016/j.tiv.2016.09.012
1830	2016	Ag	I	Irregular	PVP	Commercial	Negative	20	148	121	-17.1	-9	BALB/c3T3	2000	A	Mouse	Embryo	Fibroblast	Embryonic	L	24	0.67	WST-1	TetrazoliumSalt		102.69		63	10.1016/j.tiv.2016.09.012
1831	2016	Ag	I	Irregular	PVP	Commercial	Negative	20	148	121	-17.1	-9	BALB/c3T3	2000	A	Mouse	Embryo	Fibroblast	Embryonic	L	24	1	WST-1	TetrazoliumSalt		94.215		63	10.1016/j.tiv.2016.09.012
1832	2016	Ag	I	Irregular	PVP	Commercial	Negative	20	148	121	-17.1	-9	BALB/c3T3	2000	A	Mouse	Embryo	Fibroblast	Embryonic	L	24	1.5	WST-1	TetrazoliumSalt		98.967		63	10.1016/j.tiv.2016.09.012
1833	2016	Ag	I	Irregular	PVP	Commercial	Negative	20	148	121	-17.1	-9	BALB/c3T3	2000	A	Mouse	Embryo	Fibroblast	Embryonic	L	24	2.1	WST-1	TetrazoliumSalt		152.69		63	10.1016/j.tiv.2016.09.012
1834	2016	Ag	I	Irregular	PVP	Commercial	Negative	20	148	121	-17.1	-9	BALB/c3T3	2000	A	Mouse	Embryo	Fibroblast	Embryonic	L	24	3.1	WST-1	TetrazoliumSalt		29.752		63	10.1016/j.tiv.2016.09.012
1835	2016	Ag	I	Irregular	PVP	Commercial	Negative	20	148	121	-17.1	-9	BALB/c3T3	2000	A	Mouse	Embryo	Fibroblast	Embryonic	L	24	4.6	WST-1	TetrazoliumSalt		2.0661		63	10.1016/j.tiv.2016.09.012
1836	2016	Ag	I	Irregular	PVP	Commercial	Negative	20	148	121	-17.1	-9	BALB/c3T3	2000	A	Mouse	Embryo	Fibroblast	Embryonic	L	24	6.8	WST-1	TetrazoliumSalt		2.2727		63	10.1016/j.tiv.2016.09.012
1837	2016	Ag	I	Irregular	PVP	Commercial	Negative	20	148	121	-17.1	-9	BALB/c3T3	2000	A	Mouse	Embryo	Fibroblast	Embryonic	L	24	10	WST-1	TetrazoliumSalt		3.0992		63	10.1016/j.tiv.2016.09.012
1838	2016	Ag	I	Irregular	PVP	Commercial	Negative	20	148	121	-17.1	-9	BALB/c3T3	2000	A	Mouse	Embryo	Fibroblast	Embryonic	L	48	0.67	NRU	NeutralRed		93.388		63	10.1016/j.tiv.2016.09.012
1839	2016	Ag	I	Irregular	PVP	Commercial	Negative	20	148	121	-17.1	-9	BALB/c3T3	2000	A	Mouse	Embryo	Fibroblast	Embryonic	L	48	1	NRU	NeutralRed		92.562		63	10.1016/j.tiv.2016.09.012
1840	2016	Ag	I	Irregular	PVP	Commercial	Negative	20	148	121	-17.1	-9	BALB/c3T3	2000	A	Mouse	Embryo	Fibroblast	Embryonic	L	48	1.5	NRU	NeutralRed		90.702		63	10.1016/j.tiv.2016.09.012
1841	2016	Ag	I	Irregular	PVP	Commercial	Negative	20	148	121	-17.1	-9	BALB/c3T3	2000	A	Mouse	Embryo	Fibroblast	Embryonic	L	48	2.1	NRU	NeutralRed		89.463		63	10.1016/j.tiv.2016.09.012
1842	2016	Ag	I	Irregular	PVP	Commercial	Negative	20	148	121	-17.1	-9	BALB/c3T3	2000	A	Mouse	Embryo	Fibroblast	Embryonic	L	48	3.1	NRU	NeutralRed		24.587		63	10.1016/j.tiv.2016.09.012
1843	2016	Ag	I	Irregular	PVP	Commercial	Negative	20	148	121	-17.1	-9	BALB/c3T3	2000	A	Mouse	Embryo	Fibroblast	Embryonic	L	48	4.6	NRU	NeutralRed		0.61983		63	10.1016/j.tiv.2016.09.012
1844	2016	Ag	I	Irregular	PVP	Commercial	Negative	20	148	121	-17.1	-9	BALB/c3T3	2000	A	Mouse	Embryo	Fibroblast	Embryonic	L	48	6.8	NRU	NeutralRed		0.20661		63	10.1016/j.tiv.2016.09.012
1845	2016	Ag	I	Irregular	PVP	Commercial	Negative	20	148	121	-17.1	-9	BALB/c3T3	2000	A	Mouse	Embryo	Fibroblast	Embryonic	L	48	10	NRU	NeutralRed		0.41322		63	10.1016/j.tiv.2016.09.012
1846	2016	Ag	I	Irregular	PVP	Commercial	Negative	20	148		-17.1	-11.3	NR8383	12000	A	Rat	Lung	Macrophage	Adult	L	24	0.67	WST-1	TetrazoliumSalt		97.107		63	10.1016/j.tiv.2016.09.012
1847	2016	Ag	I	Irregular	PVP	Commercial	Negative	20	148		-17.1	-11.3	NR8383	12000	A	Rat	Lung	Macrophage	Adult	L	24	1	WST-1	TetrazoliumSalt		98.967		63	10.1016/j.tiv.2016.09.012
1848	2016	Ag	I	Irregular	PVP	Commercial	Negative	20	148		-17.1	-11.3	NR8383	12000	A	Rat	Lung	Macrophage	Adult	L	24	1.5	WST-1	TetrazoliumSalt		104.75		63	10.1016/j.tiv.2016.09.012
1849	2016	Ag	I	Irregular	PVP	Commercial	Negative	20	148		-17.1	-11.3	NR8383	12000	A	Rat	Lung	Macrophage	Adult	L	24	2.1	WST-1	TetrazoliumSalt		102.89		63	10.1016/j.tiv.2016.09.012
1850	2016	Ag	I	Irregular	PVP	Commercial	Negative	20	148		-17.1	-11.3	NR8383	12000	A	Rat	Lung	Macrophage	Adult	L	24	3.1	WST-1	TetrazoliumSalt		106.2		63	10.1016/j.tiv.2016.09.012
1851	2016	Ag	I	Irregular	PVP	Commercial	Negative	20	148		-17.1	-11.3	NR8383	12000	A	Rat	Lung	Macrophage	Adult	L	24	4.6	WST-1	TetrazoliumSalt		95.455		63	10.1016/j.tiv.2016.09.012
1852	2016	Ag	I	Irregular	PVP	Commercial	Negative	20	148		-17.1	-11.3	NR8383	12000	A	Rat	Lung	Macrophage	Adult	L	24	6.8	WST-1	TetrazoliumSalt		83.058		63	10.1016/j.tiv.2016.09.012
1853	2016	Ag	I	Irregular	PVP	Commercial	Negative	20	148		-17.1	-11.3	NR8383	12000	A	Rat	Lung	Macrophage	Adult	L	24	10	WST-1	TetrazoliumSalt		48.76		63	10.1016/j.tiv.2016.09.012
1854	2013	SiO2	I	Sphere	None	Sol-Gel Method		50					HaCat		H	Human	Skin	Keratinocyte	Adult	L	4	25	MTT	TetrazoliumSalt		99.588		64	10.1002/jat.2953
1855	2013	SiO2	I	Sphere	None	Sol-Gel Method		50					HaCat		H	Human	Skin	Keratinocyte	Adult	L	4	75	MTT	TetrazoliumSalt		94.643		64	10.1002/jat.2953
1856	2013	SiO2	I	Sphere	None	Sol-Gel Method		50					HaCat		H	Human	Skin	Keratinocyte	Adult	L	4	100	MTT	TetrazoliumSalt		52.473		64	10.1002/jat.2953
1857	2013	SiO2	I	Sphere	None	Sol-Gel Method		50					HaCat		H	Human	Skin	Keratinocyte	Adult	L	4	200	MTT	TetrazoliumSalt		36.126		64	10.1002/jat.2953
1858	2013	SiO2	I	Sphere	None	Sol-Gel Method		50					HaCat		H	Human	Skin	Keratinocyte	Adult	L	4	400	MTT	TetrazoliumSalt		22.253		64	10.1002/jat.2953
1859	2013	SiO2	I	Sphere	None	Sol-Gel Method		50					HaCat		H	Human	Skin	Keratinocyte	Adult	L	4	500	MTT	TetrazoliumSalt		19.643		64	10.1002/jat.2953
1860	2012	Ag	I	Sphere	None	Chemical Reduction	Negative			43.9		-16.2	RAW264.7	10000	A	Mouse	Ascites	Monocyte/Macrophage	Adult	L	72	1	MTT	TetrazoliumSalt		91.262	0.4	65	10.1016/j.toxlet.2012.07.009
1861	2012	Ag	I	Sphere	None	Chemical Reduction	Negative			43.9		-16.2	RAW264.7	10000	A	Mouse	Ascites	Monocyte/Macrophage	Adult	L	72	3	MTT	TetrazoliumSalt		87.5	0.4	65	10.1016/j.toxlet.2012.07.009
1862	2012	Ag	I	Sphere	None	Chemical Reduction	Negative			43.9		-16.2	RAW264.7	10000	A	Mouse	Ascites	Monocyte/Macrophage	Adult	L	72	10	MTT	TetrazoliumSalt		81.553	0.4	65	10.1016/j.toxlet.2012.07.009
1863	2012	Ag	I	Sphere	None	Chemical Reduction	Negative			43.9		-16.2	RAW264.7	10000	A	Mouse	Ascites	Monocyte/Macrophage	Adult	L	72	30	MTT	TetrazoliumSalt		52.306	0.4	65	10.1016/j.toxlet.2012.07.009
1864	2012	Ag	I	Sphere	None	Chemical Reduction	Negative			43.9		-16.2	RAW264.7	10000	A	Mouse	Ascites	Monocyte/Macrophage	Adult	L	72	100	MTT	TetrazoliumSalt		30.097	0.4	65	10.1016/j.toxlet.2012.07.009
1865	2012	Ag	I	Sphere	None	Chemical Reduction	Negative			43.9		-16.2	J774A.1	10000	A	Mouse	Ascites	Macrophage	Adult	L	72	1	MTT	TetrazoliumSalt		108.01	0.4	65	10.1016/j.toxlet.2012.07.009
1866	2012	Ag	I	Sphere	None	Chemical Reduction	Negative			43.9		-16.2	J774A.1	10000	A	Mouse	Ascites	Macrophage	Adult	L	72	3	MTT	TetrazoliumSalt		107.14	0.4	65	10.1016/j.toxlet.2012.07.009
1867	2012	Ag	I	Sphere	None	Chemical Reduction	Negative			43.9		-16.2	J774A.1	10000	A	Mouse	Ascites	Macrophage	Adult	L	72	10	MTT	TetrazoliumSalt		106.26	0.4	65	10.1016/j.toxlet.2012.07.009
1868	2012	Ag	I	Sphere	None	Chemical Reduction	Negative			43.9		-16.2	J774A.1	10000	A	Mouse	Ascites	Macrophage	Adult	L	72	30	MTT	TetrazoliumSalt		94.072	0.4	65	10.1016/j.toxlet.2012.07.009
1869	2012	Ag	I	Sphere	None	Chemical Reduction	Negative			43.9		-16.2	J774A.1	10000	A	Mouse	Ascites	Macrophage	Adult	L	72	100	MTT	TetrazoliumSalt		64.764	0.4	65	10.1016/j.toxlet.2012.07.009
1870	2012	Ag	I	Sphere	None	Commercial		20					EBF	10000	H	Human	Embryo	Fibroblast	Embryonic	P	24	0.5	CCK-8	TetrazoliumSalt		88.021		66	10.1155/2012/160145
1871	2012	Ag	I	Sphere	None	Commercial		20					EBF	10000	H	Human	Embryo	Fibroblast	Embryonic	P	24	5	CCK-8	TetrazoliumSalt		85.069		66	10.1155/2012/160145
1872	2012	Ag	I	Sphere	None	Commercial		20					EBF	10000	H	Human	Embryo	Fibroblast	Embryonic	P	24	50	CCK-8	TetrazoliumSalt		55.556		66	10.1155/2012/160145
1873	2012	Ag	I	Sphere	None	Commercial		20					EBF	10000	H	Human	Embryo	Fibroblast	Embryonic	P	24	500	CCK-8	TetrazoliumSalt		12.5		66	10.1155/2012/160145
1874	2012	Ag	I	Sphere	None	Commercial		20					L929	10000	A	Mouse	SubcutaneousConnectiveTissue	Fibroblast	Adult	L	24	0.5	CCK-8	TetrazoliumSalt		97.049		66	10.1155/2012/160145
1875	2012	Ag	I	Sphere	None	Commercial		20					L929	10000	A	Mouse	SubcutaneousConnectiveTissue	Fibroblast	Adult	L	24	5	CCK-8	TetrazoliumSalt		94.444		66	10.1155/2012/160145
1876	2012	Ag	I	Sphere	None	Commercial		20					L929	10000	A	Mouse	SubcutaneousConnectiveTissue	Fibroblast	Adult	L	24	50	CCK-8	TetrazoliumSalt		92.014		66	10.1155/2012/160145
1877	2012	Ag	I	Sphere	None	Commercial		20					L929	10000	A	Mouse	SubcutaneousConnectiveTissue	Fibroblast	Adult	L	24	500	CCK-8	TetrazoliumSalt		5.9028		66	10.1155/2012/160145
1878	2012	Ag	I	Sphere	None	Commercial		20					EBF	10000	H	Human	Embryo	Fibroblast	Embryonic	P	48	0.5	CCK-8	TetrazoliumSalt		83.505		66	10.1155/2012/160145
1879	2012	Ag	I	Sphere	None	Commercial		20					EBF	10000	H	Human	Embryo	Fibroblast	Embryonic	P	48	5	CCK-8	TetrazoliumSalt		69.931		66	10.1155/2012/160145
1880	2012	Ag	I	Sphere	None	Commercial		20					EBF	10000	H	Human	Embryo	Fibroblast	Embryonic	P	48	50	CCK-8	TetrazoliumSalt		49.485		66	10.1155/2012/160145
1881	2012	Ag	I	Sphere	None	Commercial		20					EBF	10000	H	Human	Embryo	Fibroblast	Embryonic	P	48	500	CCK-8	TetrazoliumSalt		-3.7801		66	10.1155/2012/160145
1882	2012	Ag	I	Sphere	None	Commercial		20					L929	10000	A	Mouse	SubcutaneousConnectiveTissue	Fibroblast	Adult	L	48	0.5	CCK-8	TetrazoliumSalt		99.485		66	10.1155/2012/160145
1883	2012	Ag	I	Sphere	None	Commercial		20					L929	10000	A	Mouse	SubcutaneousConnectiveTissue	Fibroblast	Adult	L	48	5	CCK-8	TetrazoliumSalt		89.519		66	10.1155/2012/160145
1884	2012	Ag	I	Sphere	None	Commercial		20					L929	10000	A	Mouse	SubcutaneousConnectiveTissue	Fibroblast	Adult	L	48	50	CCK-8	TetrazoliumSalt		85.911		66	10.1155/2012/160145
1885	2012	Ag	I	Sphere	None	Commercial		20					L929	10000	A	Mouse	SubcutaneousConnectiveTissue	Fibroblast	Adult	L	48	500	CCK-8	TetrazoliumSalt		3.9519		66	10.1155/2012/160145
1886	2012	Ag	I	Sphere	None	Commercial		20					EBF	10000	H	Human	Embryo	Fibroblast	Embryonic	P	72	0.5	CCK-8	TetrazoliumSalt		82.847		66	10.1155/2012/160145
1887	2012	Ag	I	Sphere	None	Commercial		20					EBF	10000	H	Human	Embryo	Fibroblast	Embryonic	P	72	5	CCK-8	TetrazoliumSalt		59.691		66	10.1155/2012/160145
1888	2012	Ag	I	Sphere	None	Commercial		20					EBF	10000	H	Human	Embryo	Fibroblast	Embryonic	P	72	50	CCK-8	TetrazoliumSalt		39.108		66	10.1155/2012/160145
1889	2012	Ag	I	Sphere	None	Commercial		20					EBF	10000	H	Human	Embryo	Fibroblast	Embryonic	P	72	500	CCK-8	TetrazoliumSalt		1.5437		66	10.1155/2012/160145
1890	2012	Ag	I	Sphere	None	Commercial		20					L929	10000	A	Mouse	SubcutaneousConnectiveTissue	Fibroblast	Adult	L	72	0.5	CCK-8	TetrazoliumSalt		83.877		66	10.1155/2012/160145
1891	2012	Ag	I	Sphere	None	Commercial		20					L929	10000	A	Mouse	SubcutaneousConnectiveTissue	Fibroblast	Adult	L	72	5	CCK-8	TetrazoliumSalt		81.818		66	10.1155/2012/160145
1892	2012	Ag	I	Sphere	None	Commercial		20					L929	10000	A	Mouse	SubcutaneousConnectiveTissue	Fibroblast	Adult	L	72	50	CCK-8	TetrazoliumSalt		58.834		66	10.1155/2012/160145
1893	2012	Ag	I	Sphere	None	Commercial		20					L929	10000	A	Mouse	SubcutaneousConnectiveTissue	Fibroblast	Adult	L	72	500	CCK-8	TetrazoliumSalt		2.4014		66	10.1155/2012/160145
1894	2012	Ag	I	Sphere	None	Commercial		100					EBF	10000	H	Human	Embryo	Fibroblast	Embryonic	P	24	0.5	CCK-8	TetrazoliumSalt		87.13		66	10.1155/2012/160145
1895	2012	Ag	I	Sphere	None	Commercial		100					EBF	10000	H	Human	Embryo	Fibroblast	Embryonic	P	24	5	CCK-8	TetrazoliumSalt		78.609		66	10.1155/2012/160145
1896	2012	Ag	I	Sphere	None	Commercial		100					EBF	10000	H	Human	Embryo	Fibroblast	Embryonic	P	24	50	CCK-8	TetrazoliumSalt		55.13		66	10.1155/2012/160145
1897	2012	Ag	I	Sphere	None	Commercial		100					EBF	10000	H	Human	Embryo	Fibroblast	Embryonic	P	24	500	CCK-8	TetrazoliumSalt		9.913		66	10.1155/2012/160145
1898	2012	Ag	I	Sphere	None	Commercial		100					L929	10000	A	Mouse	SubcutaneousConnectiveTissue	Fibroblast	Adult	L	24	0.5	CCK-8	TetrazoliumSalt		98.087		66	10.1155/2012/160145
1899	2012	Ag	I	Sphere	None	Commercial		100					L929	10000	A	Mouse	SubcutaneousConnectiveTissue	Fibroblast	Adult	L	24	5	CCK-8	TetrazoliumSalt		95.652		66	10.1155/2012/160145
1900	2012	Ag	I	Sphere	None	Commercial		100					L929	10000	A	Mouse	SubcutaneousConnectiveTissue	Fibroblast	Adult	L	24	50	CCK-8	TetrazoliumSalt		96.522		66	10.1155/2012/160145
1901	2012	Ag	I	Sphere	None	Commercial		100					L929	10000	A	Mouse	SubcutaneousConnectiveTissue	Fibroblast	Adult	L	24	500	CCK-8	TetrazoliumSalt		1.0435		66	10.1155/2012/160145
1902	2012	Ag	I	Sphere	None	Commercial		100					EBF	10000	H	Human	Embryo	Fibroblast	Embryonic	P	48	0.5	CCK-8	TetrazoliumSalt		88.644		66	10.1155/2012/160145
1903	2012	Ag	I	Sphere	None	Commercial		100					EBF	10000	H	Human	Embryo	Fibroblast	Embryonic	P	48	5	CCK-8	TetrazoliumSalt		90.169		66	10.1155/2012/160145
1904	2012	Ag	I	Sphere	None	Commercial		100					EBF	10000	H	Human	Embryo	Fibroblast	Embryonic	P	48	50	CCK-8	TetrazoliumSalt		63.39		66	10.1155/2012/160145
1905	2012	Ag	I	Sphere	None	Commercial		100					EBF	10000	H	Human	Embryo	Fibroblast	Embryonic	P	48	500	CCK-8	TetrazoliumSalt		-1.5254		66	10.1155/2012/160145
1906	2012	Ag	I	Sphere	None	Commercial		100					L929	10000	A	Mouse	SubcutaneousConnectiveTissue	Fibroblast	Adult	L	48	0.5	CCK-8	TetrazoliumSalt		92.542		66	10.1155/2012/160145
1907	2012	Ag	I	Sphere	None	Commercial		100					L929	10000	A	Mouse	SubcutaneousConnectiveTissue	Fibroblast	Adult	L	48	5	CCK-8	TetrazoliumSalt		96.61		66	10.1155/2012/160145
1908	2012	Ag	I	Sphere	None	Commercial		100					L929	10000	A	Mouse	SubcutaneousConnectiveTissue	Fibroblast	Adult	L	48	50	CCK-8	TetrazoliumSalt		96.102		66	10.1155/2012/160145
1909	2012	Ag	I	Sphere	None	Commercial		100					L929	10000	A	Mouse	SubcutaneousConnectiveTissue	Fibroblast	Adult	L	48	500	CCK-8	TetrazoliumSalt		2.3729		66	10.1155/2012/160145
1910	2012	Ag	I	Sphere	None	Commercial		100					EBF	10000	H	Human	Embryo	Fibroblast	Embryonic	P	72	0.5	CCK-8	TetrazoliumSalt		77.108		66	10.1155/2012/160145
1911	2012	Ag	I	Sphere	None	Commercial		100					EBF	10000	H	Human	Embryo	Fibroblast	Embryonic	P	72	5	CCK-8	TetrazoliumSalt		75.559		66	10.1155/2012/160145
1912	2012	Ag	I	Sphere	None	Commercial		100					EBF	10000	H	Human	Embryo	Fibroblast	Embryonic	P	72	50	CCK-8	TetrazoliumSalt		55.25		66	10.1155/2012/160145
1913	2012	Ag	I	Sphere	None	Commercial		100					EBF	10000	H	Human	Embryo	Fibroblast	Embryonic	P	72	500	CCK-8	TetrazoliumSalt		-1.3769		66	10.1155/2012/160145
1914	2012	Ag	I	Sphere	None	Commercial		100					L929	10000	A	Mouse	SubcutaneousConnectiveTissue	Fibroblast	Adult	L	72	0.5	CCK-8	TetrazoliumSalt		91.05		66	10.1155/2012/160145
1915	2012	Ag	I	Sphere	None	Commercial		100					L929	10000	A	Mouse	SubcutaneousConnectiveTissue	Fibroblast	Adult	L	72	5	CCK-8	TetrazoliumSalt		91.91		66	10.1155/2012/160145
1916	2012	Ag	I	Sphere	None	Commercial		100					L929	10000	A	Mouse	SubcutaneousConnectiveTissue	Fibroblast	Adult	L	72	50	CCK-8	TetrazoliumSalt		91.566		66	10.1155/2012/160145
1917	2012	Ag	I	Sphere	None	Commercial		100					L929	10000	A	Mouse	SubcutaneousConnectiveTissue	Fibroblast	Adult	L	72	500	CCK-8	TetrazoliumSalt		11.876		66	10.1155/2012/160145
1918	2018	HAP	I	Rod	None	Precipitation				567.86			hMSC		H	Human	BoneMarrow	Spindle	Adult	P	24	5	CCK-8	TetrazoliumSalt	6.25	98.864		67	10.1155/2018/2036176
1919	2018	HAP	I	Rod	None	Precipitation				567.86			hMSC		H	Human	BoneMarrow	Spindle	Adult	P	24	10	CCK-8	TetrazoliumSalt	6.25	100		67	10.1155/2018/2036176
1920	2018	HAP	I	Rod	None	Precipitation				567.86			hMSC		H	Human	BoneMarrow	Spindle	Adult	P	24	50	CCK-8	TetrazoliumSalt	6.25	91.136		67	10.1155/2018/2036176
1921	2018	HAP	I	Rod	None	Precipitation				626.1			hMSC		H	Human	BoneMarrow	Spindle	Adult	P	24	5	CCK-8	TetrazoliumSalt	6.67	100		67	10.1155/2018/2036176
1922	2018	HAP	I	Rod	None	Precipitation				626.1			hMSC		H	Human	BoneMarrow	Spindle	Adult	P	24	10	CCK-8	TetrazoliumSalt	6.67	99.318		67	10.1155/2018/2036176
1923	2018	HAP	I	Rod	None	Precipitation				626.1			hMSC		H	Human	BoneMarrow	Spindle	Adult	P	24	50	CCK-8	TetrazoliumSalt	6.67	89.318		67	10.1155/2018/2036176
1924	2018	HAP	I	Rod	None	Precipitation				1262.33			hMSC		H	Human	BoneMarrow	Spindle	Adult	P	24	5	CCK-8	TetrazoliumSalt	7.5	99.318		67	10.1155/2018/2036176
1925	2018	HAP	I	Rod	None	Precipitation				1262.33			hMSC		H	Human	BoneMarrow	Spindle	Adult	P	24	10	CCK-8	TetrazoliumSalt	7.5	99.318		67	10.1155/2018/2036176
1926	2018	HAP	I	Rod	None	Precipitation				1262.33			hMSC		H	Human	BoneMarrow	Spindle	Adult	P	24	50	CCK-8	TetrazoliumSalt	7.5	85.227		67	10.1155/2018/2036176
1927	2018	HAP	I	Rod	None	Precipitation				567.86			hMSC		H	Human	BoneMarrow	Spindle	Adult	P	72	5	CCK-8	TetrazoliumSalt	6.25	100.45		67	10.1155/2018/2036176
1928	2018	HAP	I	Rod	None	Precipitation				567.86			hMSC		H	Human	BoneMarrow	Spindle	Adult	P	72	10	CCK-8	TetrazoliumSalt	6.25	99.324		67	10.1155/2018/2036176
1929	2018	HAP	I	Rod	None	Precipitation				567.86			hMSC		H	Human	BoneMarrow	Spindle	Adult	P	72	50	CCK-8	TetrazoliumSalt	6.25	90.541		67	10.1155/2018/2036176
1930	2018	HAP	I	Rod	None	Precipitation				626.1			hMSC		H	Human	BoneMarrow	Spindle	Adult	P	72	5	CCK-8	TetrazoliumSalt	6.67	99.324		67	10.1155/2018/2036176
1931	2018	HAP	I	Rod	None	Precipitation				626.1			hMSC		H	Human	BoneMarrow	Spindle	Adult	P	72	10	CCK-8	TetrazoliumSalt	6.67	99.324		67	10.1155/2018/2036176
1932	2018	HAP	I	Rod	None	Precipitation				626.1			hMSC		H	Human	BoneMarrow	Spindle	Adult	P	72	50	CCK-8	TetrazoliumSalt	6.67	93.468		67	10.1155/2018/2036176
1933	2018	HAP	I	Rod	None	Precipitation				1262.33			hMSC		H	Human	BoneMarrow	Spindle	Adult	P	72	5	CCK-8	TetrazoliumSalt	7.5	98.649		67	10.1155/2018/2036176
1934	2018	HAP	I	Rod	None	Precipitation				1262.33			hMSC		H	Human	BoneMarrow	Spindle	Adult	P	72	10	CCK-8	TetrazoliumSalt	7.5	98.649		67	10.1155/2018/2036176
1935	2018	HAP	I	Rod	None	Precipitation				1262.33			hMSC		H	Human	BoneMarrow	Spindle	Adult	P	72	50	CCK-8	TetrazoliumSalt	7.5	92.342		67	10.1155/2018/2036176
1936	2010	HAP	I	Sphere	None	Sol-Gel Method			26				HepG2	100000	H	Human	Liver	Epithelial	Adult	L	48	200	MTT	TetrazoliumSalt		53.263		68	10.1016/j.biomaterials.2009.09.088
1937	2010	HAP	I	Sphere	None	Sol-Gel Method			45				HepG2	100000	H	Human	Liver	Epithelial	Adult	L	48	200	MTT	TetrazoliumSalt		22.458		68	10.1016/j.biomaterials.2009.09.088
1938	2010	HAP	I	Sphere	None	Sol-Gel Method			78				HepG2	100000	H	Human	Liver	Epithelial	Adult	L	48	200	MTT	TetrazoliumSalt		65.554		68	10.1016/j.biomaterials.2009.09.088
1939	2010	HAP	I	Sphere	None	Sol-Gel Method			175				HepG2	100000	H	Human	Liver	Epithelial	Adult	L	48	200	MTT	TetrazoliumSalt		91.047		68	10.1016/j.biomaterials.2009.09.088
1940	2010	HAP	I	Sphere	None	Sol-Gel Method			26				L-02	100000	H	Human	Liver	Epithelial	Embryonic	L	48	200	MTT	TetrazoliumSalt		96.662		68	10.1016/j.biomaterials.2009.09.088
1941	2010	HAP	I	Sphere	None	Sol-Gel Method			45				L-02	100000	H	Human	Liver	Epithelial	Embryonic	L	48	200	MTT	TetrazoliumSalt		95.144		68	10.1016/j.biomaterials.2009.09.088
1942	2010	HAP	I	Sphere	None	Sol-Gel Method			78				L-02	100000	H	Human	Liver	Epithelial	Embryonic	L	48	200	MTT	TetrazoliumSalt		94.537		68	10.1016/j.biomaterials.2009.09.088
1943	2010	HAP	I	Sphere	None	Sol-Gel Method			175				L-02	100000	H	Human	Liver	Epithelial	Embryonic	L	48	200	MTT	TetrazoliumSalt		94.841		68	10.1016/j.biomaterials.2009.09.088
1944	2010	HAP	I	Sphere	None	Sol-Gel Method			26				HepG2	100000	H	Human	Liver	Epithelial	Adult	L	24	200	MTT	TetrazoliumSalt		73.149		68	10.1016/j.biomaterials.2009.09.088
1945	2010	HAP	I	Sphere	None	Sol-Gel Method			45				HepG2	100000	H	Human	Liver	Epithelial	Adult	L	24	200	MTT	TetrazoliumSalt		52.044		68	10.1016/j.biomaterials.2009.09.088
1946	2010	HAP	I	Sphere	None	Sol-Gel Method			78				HepG2	100000	H	Human	Liver	Epithelial	Adult	L	24	200	MTT	TetrazoliumSalt		82.541		68	10.1016/j.biomaterials.2009.09.088
1947	2010	HAP	I	Sphere	None	Sol-Gel Method			175				HepG2	100000	H	Human	Liver	Epithelial	Adult	L	24	200	MTT	TetrazoliumSalt		94.917		68	10.1016/j.biomaterials.2009.09.088
1948	2010	HAP	I	Sphere	None	Sol-Gel Method			26				HepG2	100000	H	Human	Liver	Epithelial	Adult	L	48	200	MTT	TetrazoliumSalt		53.37		68	10.1016/j.biomaterials.2009.09.088
1949	2010	HAP	I	Sphere	None	Sol-Gel Method			45				HepG2	100000	H	Human	Liver	Epithelial	Adult	L	48	200	MTT	TetrazoliumSalt		22.32		68	10.1016/j.biomaterials.2009.09.088
1950	2010	HAP	I	Sphere	None	Sol-Gel Method			78				HepG2	100000	H	Human	Liver	Epithelial	Adult	L	48	200	MTT	TetrazoliumSalt		73.481		68	10.1016/j.biomaterials.2009.09.088
1951	2010	HAP	I	Sphere	None	Sol-Gel Method			175				HepG2	100000	H	Human	Liver	Epithelial	Adult	L	48	200	MTT	TetrazoliumSalt		89.945		68	10.1016/j.biomaterials.2009.09.088
1952	2010	HAP	I	Sphere	None	Sol-Gel Method			26				HepG2	100000	H	Human	Liver	Epithelial	Adult	L	72	200	MTT	TetrazoliumSalt		48.066		68	10.1016/j.biomaterials.2009.09.088
1953	2010	HAP	I	Sphere	None	Sol-Gel Method			45				HepG2	100000	H	Human	Liver	Epithelial	Adult	L	72	200	MTT	TetrazoliumSalt		20.994		68	10.1016/j.biomaterials.2009.09.088
1954	2010	HAP	I	Sphere	None	Sol-Gel Method			78				HepG2	100000	H	Human	Liver	Epithelial	Adult	L	72	200	MTT	TetrazoliumSalt		70.718		68	10.1016/j.biomaterials.2009.09.088
1955	2010	HAP	I	Sphere	None	Sol-Gel Method			175				HepG2	100000	H	Human	Liver	Epithelial	Adult	L	72	200	MTT	TetrazoliumSalt		86.961		68	10.1016/j.biomaterials.2009.09.088
1956	2010	CuO	I	Sphere	None	Commercial	Negative	52.51		65.59		-39.67	A549	10000	H	Human	Lung	Epithelial	Adult	L	24	10	MTT	TetrazoliumSalt		75		69	10.1016/j.bbrc.2010.04.156
1957	2010	CuO	I	Sphere	None	Commercial	Negative	52.51		65.59		-39.67	A549	10000	H	Human	Lung	Epithelial	Adult	L	24	25	MTT	TetrazoliumSalt		66		69	10.1016/j.bbrc.2010.04.156
1958	2010	CuO	I	Sphere	None	Commercial	Negative	52.51		65.59		-39.67	A549	10000	H	Human	Lung	Epithelial	Adult	L	24	50	MTT	TetrazoliumSalt		48		69	10.1016/j.bbrc.2010.04.156
1959	2010	CuO	I	Sphere	None	Commercial	Negative	52.51		65.59		-39.67	A549	10000	H	Human	Lung	Epithelial	Adult	L	24	10	NRU	NeutralRed		85		69	10.1016/j.bbrc.2010.04.156
1960	2010	CuO	I	Sphere	None	Commercial	Negative	52.51		65.59		-39.67	A549	10000	H	Human	Lung	Epithelial	Adult	L	24	25	NRU	NeutralRed		69		69	10.1016/j.bbrc.2010.04.156
1961	2010	CuO	I	Sphere	None	Commercial	Negative	52.51		65.59		-39.67	A549	10000	H	Human	Lung	Epithelial	Adult	L	24	50	NRU	NeutralRed		46		69	10.1016/j.bbrc.2010.04.156
1962	2014	CuO	I	Sphere	None	Commercial	Negative	30.09	403	310	-20	-12.1	hMSC	4500	H	Human	BoneMarrow	Spindle	Adult	P	48	1.78	NRU	NeutralRed		78.035	0.37	70	10.3109/15376516.2014.928920
1963	2014	CuO	I	Sphere	None	Commercial	Negative	30.09	403	310	-20	-12.1	hMSC	4500	H	Human	BoneMarrow	Spindle	Adult	P	48	3.16	NRU	NeutralRed		31.985	0.37	70	10.3109/15376516.2014.928920
1964	2014	CuO	I	Sphere	None	Commercial	Negative	30.09	403	310	-20	-12.1	hMSC	4500	H	Human	BoneMarrow	Spindle	Adult	P	48	5.62	NRU	NeutralRed		10.405	0.37	70	10.3109/15376516.2014.928920
1965	2014	CuO	I	Sphere	None	Commercial	Negative	30.09	403	310	-20	-12.1	hMSC	4500	H	Human	BoneMarrow	Spindle	Adult	P	48	10	NRU	NeutralRed		4.2389	0.37	70	10.3109/15376516.2014.928920
1966	2014	CuO	I	Sphere	None	Commercial	Negative	30.09	403	310	-20	-12.1	hMSC	4500	H	Human	BoneMarrow	Spindle	Adult	P	48	17.8	NRU	NeutralRed		2.1195	0.37	70	10.3109/15376516.2014.928920
1967	2014	CuO	I	Sphere	None	Commercial	Negative	30.09	403	310	-20	-12.1	hMSC	4500	H	Human	BoneMarrow	Spindle	Adult	P	48	31.6	NRU	NeutralRed		1.1561	0.37	70	10.3109/15376516.2014.928920
1968	2014	CuO	I	Sphere	None	Commercial	Negative	30.09	403	310	-20	-12.1	hMSC	4500	H	Human	BoneMarrow	Spindle	Adult	P	48	56.2	NRU	NeutralRed		0.385	0.37	70	10.3109/15376516.2014.928920
1969	2014	CuO	I	Sphere	None	Commercial	Negative	30.09	403	310	-20	-12.1	hMSC	4500	H	Human	BoneMarrow	Spindle	Adult	P	48	100	NRU	NeutralRed		0.385	0.37	70	10.3109/15376516.2014.928920
1970	2016	CuO	I	Sphere	None	Solvothermal Process	Negative	23		87		-25	A549	1000	H	Human	Lung	Epithelial	Adult	L	24	5	MTT	TetrazoliumSalt		81.514		71	10.1177/0748233713511512
1971	2016	CuO	I	Sphere	None	Solvothermal Process	Negative	23		87		-25	A549	1000	H	Human	Lung	Epithelial	Adult	L	24	10	MTT	TetrazoliumSalt		56.477		71	10.1177/0748233713511512
1972	2016	CuO	I	Sphere	None	Solvothermal Process	Negative	23		87		-25	A549	1000	H	Human	Lung	Epithelial	Adult	L	24	15	MTT	TetrazoliumSalt		31.441		71	10.1177/0748233713511512
1973	2012	CuO	I	Sphere	None	Commercial		40		644			Caco-2	50000	H	Human	Colon	Epithelial	Adult	L	24	25	MTS	TetrazoliumSalt		114.06		72	10.3109/17435390.2011.625127
1974	2012	CuO	I	Sphere	None	Commercial		40		644			Caco-2	50000	H	Human	Colon	Epithelial	Adult	L	48	25	MTS	TetrazoliumSalt		75.332		72	10.3109/17435390.2011.625127
1975	2012	CuO	I	Rod	None	Commercial		10		527			Caco-2	50000	H	Human	Colon	Epithelial	Adult	L	24	25	MTS	TetrazoliumSalt	7.4	75.862		72	10.3109/17435390.2011.625127
1976	2012	CuO	I	Rod	None	Commercial		10		527			Caco-2	50000	H	Human	Colon	Epithelial	Adult	L	48	25	MTS	TetrazoliumSalt	7.4	64.721		72	10.3109/17435390.2011.625127
1977	2012	CuO	I	Sphere	None	Commercial		40		644			A549		H	Human	Lung	Epithelial	Adult	L	24	5	MTS	TetrazoliumSalt		100		72	10.3109/17435390.2011.625127
1978	2012	CuO	I	Sphere	None	Commercial		40		644			A549		H	Human	Lung	Epithelial	Adult	L	24	10	MTS	TetrazoliumSalt		102.87		72	10.3109/17435390.2011.625127
1979	2012	CuO	I	Sphere	None	Commercial		40		644			A549		H	Human	Lung	Epithelial	Adult	L	24	25	MTS	TetrazoliumSalt		94.702		72	10.3109/17435390.2011.625127
1980	2012	CuO	I	Sphere	None	Commercial		40		644			A549		H	Human	Lung	Epithelial	Adult	L	24	50	MTS	TetrazoliumSalt		85.872		72	10.3109/17435390.2011.625127
1981	2012	CuO	I	Sphere	None	Commercial		40		644			A549		H	Human	Lung	Epithelial	Adult	L	24	100	MTS	TetrazoliumSalt		52.759		72	10.3109/17435390.2011.625127
1982	2012	CuO	I	Rod	None	Commercial		10		527			A549		H	Human	Lung	Epithelial	Adult	L	24	5	MTS	TetrazoliumSalt	7.4	103.31		72	10.3109/17435390.2011.625127
1983	2012	CuO	I	Rod	None	Commercial		10		527			A549		H	Human	Lung	Epithelial	Adult	L	24	10	MTS	TetrazoliumSalt	7.4	98.455		72	10.3109/17435390.2011.625127
1984	2012	CuO	I	Rod	None	Commercial		10		527			A549		H	Human	Lung	Epithelial	Adult	L	24	25	MTS	TetrazoliumSalt	7.4	84.768		72	10.3109/17435390.2011.625127
1985	2012	CuO	I	Rod	None	Commercial		10		527			A549		H	Human	Lung	Epithelial	Adult	L	24	50	MTS	TetrazoliumSalt	7.4	56.291		72	10.3109/17435390.2011.625127
1986	2012	CuO	I	Rod	None	Commercial		10		527			A549		H	Human	Lung	Epithelial	Adult	L	24	100	MTS	TetrazoliumSalt	7.4	15.011		72	10.3109/17435390.2011.625127
1987	2015	CeO2	I	Sphere	None	Sol-Gel Method		20.3					L929	5000	A	Mouse	SubcutaneousConnectiveTissue	Fibroblast	Adult	L	24	50	MTT	TetrazoliumSalt		105.86		73	10.1016/j.ceramint.2014.09.095
1988	2015	CeO2	I	Sphere	None	Sol-Gel Method		20.3					L929	5000	A	Mouse	SubcutaneousConnectiveTissue	Fibroblast	Adult	L	24	100	MTT	TetrazoliumSalt		103.06		73	10.1016/j.ceramint.2014.09.095
1989	2015	CeO2	I	Sphere	None	Sol-Gel Method		20.3					L929	5000	A	Mouse	SubcutaneousConnectiveTissue	Fibroblast	Adult	L	24	200	MTT	TetrazoliumSalt		104.97		73	10.1016/j.ceramint.2014.09.095
1990	2015	CeO2	I	Sphere	None	Sol-Gel Method		20.3					L929	5000	A	Mouse	SubcutaneousConnectiveTissue	Fibroblast	Adult	L	24	400	MTT	TetrazoliumSalt		100		73	10.1016/j.ceramint.2014.09.095
1991	2015	CeO2	I	Sphere	None	Sol-Gel Method		20.3					L929	5000	A	Mouse	SubcutaneousConnectiveTissue	Fibroblast	Adult	L	24	800	MTT	TetrazoliumSalt		96.943		73	10.1016/j.ceramint.2014.09.095
1992	2013	CeO2	I	Sphere	None	Sol-Gel Method		4.7					neuro2A	10000	A	Mouse	Brain	Neuronal	Adult	L	24	5.46	MTT	TetrazoliumSalt		82.4		74	10.1016/j.ceramint.2013.02.026
1993	2013	CeO2	I	Sphere	None	Sol-Gel Method		4.7					neuro2A	10000	A	Mouse	Brain	Neuronal	Adult	L	24	10.93	MTT	TetrazoliumSalt		84.667		74	10.1016/j.ceramint.2013.02.026
1994	2013	CeO2	I	Sphere	None	Sol-Gel Method		4.7					neuro2A	10000	A	Mouse	Brain	Neuronal	Adult	L	24	21.87	MTT	TetrazoliumSalt		74.933		74	10.1016/j.ceramint.2013.02.026
1995	2013	CeO2	I	Sphere	None	Sol-Gel Method		4.7					neuro2A	10000	A	Mouse	Brain	Neuronal	Adult	L	24	43.75	MTT	TetrazoliumSalt		75.467		74	10.1016/j.ceramint.2013.02.026
1996	2013	CeO2	I	Sphere	None	Sol-Gel Method		4.7					neuro2A	10000	A	Mouse	Brain	Neuronal	Adult	L	24	87.5	MTT	TetrazoliumSalt		67.733		74	10.1016/j.ceramint.2013.02.026
1997	2013	CeO2	I	Sphere	None	Sol-Gel Method		4.7					neuro2A	10000	A	Mouse	Brain	Neuronal	Adult	L	24	175	MTT	TetrazoliumSalt		66.8		74	10.1016/j.ceramint.2013.02.026
1998	2018	ZnO	I	Sphere	None	Commercial		30	0.04	54.17			A549	5000	H	Human	Lung	Epithelial	Adult	L	24	1	CCK-8	TetrazoliumSalt		96.943	0.17	75	10.1007/s11051-018-4333-0
1999	2018	ZnO	I	Sphere	None	Commercial		30	180.55	55.74			A549	5000	H	Human	Lung	Epithelial	Adult	L	24	2.5	CCK-8	TetrazoliumSalt		98.69	0.35	75	10.1007/s11051-018-4333-0
[truncated: 2,112 more rows]
